# Supplementary material for: Identifying Patients with Atrioventricular Septal Defect in Down Syndrome Populations by Using Self-Normalizing Neural Networks and Feature Selection
Source: MDPI journal article supplement (doi:10.3390/genes9040208), 2018-04-12
Supplement: s1 [file s1]

**Supplementary Material S2.** Two series of MCCs and AUCs resulting from IFS method and SNN classifiers.

**(1) IFS first series**

| <b>Number of features</b> | <b><i>MCC</i></b> | <b><i>AUC</i></b> |
|---------------------------|-------------------|-------------------|
| 10                        | 0.287             | 0.698             |
| 20                        | 0.311             | 0.699             |
| 30                        | 0.323             | 0.727             |
| 40                        | 0.382             | 0.738             |
| 50                        | 0.367             | 0.743             |
| 60                        | 0.359             | 0.756             |
| 70                        | 0.401             | 0.746             |
| 80                        | 0.423             | 0.785             |
| 90                        | 0.424             | 0.755             |
| 100                       | 0.428             | 0.751             |
| 110                       | 0.424             | 0.767             |
| 120                       | 0.426             | 0.769             |
| 130                       | 0.430             | 0.802             |
| 140                       | 0.453             | 0.790             |
| 150                       | 0.430             | 0.797             |
| 160                       | 0.469             | 0.804             |
| 170                       | 0.469             | 0.819             |
| 180                       | 0.510             | 0.794             |
| 190                       | 0.481             | 0.802             |
| 200                       | 0.499             | 0.819             |
| 210                       | 0.537             | 0.831             |
| 220                       | 0.454             | 0.825             |
| 230                       | 0.488             | 0.847             |
| 240                       | 0.530             | 0.824             |
| 250                       | 0.517             | 0.823             |
| 260                       | 0.549             | 0.826             |
| 270                       | 0.534             | 0.816             |
| 280                       | 0.507             | 0.838             |
| 290                       | 0.563             | 0.848             |
| 300                       | 0.501             | 0.839             |
| 310                       | 0.545             | 0.839             |
| 320                       | 0.549             | 0.840             |
| 330                       | 0.530             | 0.847             |
| 340                       | 0.545             | 0.840             |
| 350                       | 0.534             | 0.849             |

|     |       |       |
|-----|-------|-------|
| 360 | 0.539 | 0.830 |
| 370 | 0.564 | 0.858 |
| 380 | 0.507 | 0.840 |
| 390 | 0.553 | 0.837 |
| 400 | 0.573 | 0.842 |
| 410 | 0.542 | 0.833 |
| 420 | 0.580 | 0.862 |
| 430 | 0.542 | 0.858 |
| 440 | 0.563 | 0.859 |
| 450 | 0.592 | 0.853 |
| 460 | 0.587 | 0.865 |
| 470 | 0.588 | 0.861 |
| 480 | 0.572 | 0.869 |
| 490 | 0.575 | 0.862 |
| 500 | 0.612 | 0.874 |
| 510 | 0.581 | 0.877 |
| 520 | 0.593 | 0.881 |
| 530 | 0.504 | 0.868 |
| 540 | 0.580 | 0.867 |
| 550 | 0.545 | 0.866 |
| 560 | 0.526 | 0.862 |
| 570 | 0.577 | 0.877 |
| 580 | 0.508 | 0.869 |
| 590 | 0.527 | 0.873 |
| 600 | 0.538 | 0.868 |
| 610 | 0.513 | 0.864 |
| 620 | 0.508 | 0.857 |
| 630 | 0.554 | 0.864 |
| 640 | 0.562 | 0.858 |
| 650 | 0.563 | 0.859 |
| 660 | 0.509 | 0.857 |
| 670 | 0.553 | 0.859 |
| 680 | 0.512 | 0.877 |
| 690 | 0.583 | 0.873 |
| 700 | 0.582 | 0.880 |
| 710 | 0.550 | 0.876 |
| 720 | 0.553 | 0.879 |
| 730 | 0.531 | 0.872 |
| 740 | 0.579 | 0.893 |

|      |       |       |
|------|-------|-------|
| 750  | 0.524 | 0.872 |
| 760  | 0.565 | 0.873 |
| 770  | 0.550 | 0.885 |
| 780  | 0.566 | 0.894 |
| 790  | 0.576 | 0.866 |
| 800  | 0.580 | 0.883 |
| 810  | 0.570 | 0.878 |
| 820  | 0.588 | 0.892 |
| 830  | 0.543 | 0.887 |
| 840  | 0.598 | 0.890 |
| 850  | 0.576 | 0.895 |
| 860  | 0.610 | 0.881 |
| 870  | 0.521 | 0.886 |
| 880  | 0.599 | 0.883 |
| 890  | 0.619 | 0.899 |
| 900  | 0.562 | 0.891 |
| 910  | 0.583 | 0.895 |
| 920  | 0.595 | 0.880 |
| 930  | 0.658 | 0.898 |
| 940  | 0.627 | 0.896 |
| 950  | 0.539 | 0.900 |
| 960  | 0.611 | 0.884 |
| 970  | 0.581 | 0.877 |
| 980  | 0.620 | 0.886 |
| 990  | 0.609 | 0.895 |
| 1000 | 0.566 | 0.890 |
| 1010 | 0.623 | 0.885 |
| 1020 | 0.616 | 0.899 |
| 1030 | 0.624 | 0.908 |
| 1040 | 0.532 | 0.887 |
| 1050 | 0.616 | 0.882 |
| 1060 | 0.618 | 0.889 |
| 1070 | 0.618 | 0.903 |
| 1080 | 0.597 | 0.895 |
| 1090 | 0.627 | 0.893 |
| 1100 | 0.563 | 0.887 |
| 1110 | 0.615 | 0.897 |
| 1120 | 0.623 | 0.885 |
| 1130 | 0.597 | 0.881 |

|      |       |       |
|------|-------|-------|
| 1140 | 0.630 | 0.903 |
| 1150 | 0.597 | 0.885 |
| 1160 | 0.631 | 0.901 |
| 1170 | 0.615 | 0.889 |
| 1180 | 0.612 | 0.899 |
| 1190 | 0.588 | 0.891 |
| 1200 | 0.576 | 0.898 |
| 1210 | 0.647 | 0.895 |
| 1220 | 0.626 | 0.887 |
| 1230 | 0.622 | 0.899 |
| 1240 | 0.656 | 0.902 |
| 1250 | 0.616 | 0.898 |
| 1260 | 0.592 | 0.895 |
| 1270 | 0.619 | 0.892 |
| 1280 | 0.611 | 0.895 |
| 1290 | 0.635 | 0.902 |
| 1300 | 0.639 | 0.904 |
| 1310 | 0.640 | 0.905 |
| 1320 | 0.617 | 0.886 |
| 1330 | 0.629 | 0.884 |
| 1340 | 0.644 | 0.895 |
| 1350 | 0.601 | 0.907 |
| 1360 | 0.643 | 0.897 |
| 1370 | 0.584 | 0.898 |
| 1380 | 0.617 | 0.894 |
| 1390 | 0.671 | 0.887 |
| 1400 | 0.632 | 0.904 |
| 1410 | 0.634 | 0.880 |
| 1420 | 0.589 | 0.889 |
| 1430 | 0.618 | 0.889 |
| 1440 | 0.669 | 0.889 |
| 1450 | 0.628 | 0.901 |
| 1460 | 0.644 | 0.910 |
| 1470 | 0.626 | 0.903 |
| 1480 | 0.576 | 0.892 |
| 1490 | 0.621 | 0.907 |
| 1500 | 0.605 | 0.919 |
| 1510 | 0.625 | 0.911 |
| 1520 | 0.631 | 0.893 |

|      |       |       |
|------|-------|-------|
| 1530 | 0.675 | 0.913 |
| 1540 | 0.647 | 0.903 |
| 1550 | 0.602 | 0.914 |
| 1560 | 0.642 | 0.908 |
| 1570 | 0.590 | 0.914 |
| 1580 | 0.633 | 0.913 |
| 1590 | 0.606 | 0.916 |
| 1600 | 0.612 | 0.918 |
| 1610 | 0.662 | 0.907 |
| 1620 | 0.643 | 0.917 |
| 1630 | 0.636 | 0.925 |
| 1640 | 0.675 | 0.920 |
| 1650 | 0.631 | 0.906 |
| 1660 | 0.659 | 0.927 |
| 1670 | 0.634 | 0.915 |
| 1680 | 0.641 | 0.931 |
| 1690 | 0.653 | 0.909 |
| 1700 | 0.652 | 0.919 |
| 1710 | 0.667 | 0.917 |
| 1720 | 0.646 | 0.905 |
| 1730 | 0.658 | 0.902 |
| 1740 | 0.668 | 0.923 |
| 1750 | 0.642 | 0.912 |
| 1760 | 0.601 | 0.898 |
| 1770 | 0.593 | 0.905 |
| 1780 | 0.665 | 0.908 |
| 1790 | 0.623 | 0.897 |
| 1800 | 0.637 | 0.904 |
| 1810 | 0.652 | 0.906 |
| 1820 | 0.653 | 0.904 |
| 1830 | 0.631 | 0.913 |
| 1840 | 0.652 | 0.921 |
| 1850 | 0.622 | 0.900 |
| 1860 | 0.666 | 0.911 |
| 1870 | 0.626 | 0.898 |
| 1880 | 0.611 | 0.920 |
| 1890 | 0.648 | 0.909 |
| 1900 | 0.656 | 0.914 |
| 1910 | 0.706 | 0.909 |

|      |       |       |
|------|-------|-------|
| 1920 | 0.585 | 0.898 |
| 1930 | 0.663 | 0.913 |
| 1940 | 0.655 | 0.897 |
| 1950 | 0.633 | 0.926 |
| 1960 | 0.650 | 0.901 |
| 1970 | 0.689 | 0.922 |
| 1980 | 0.675 | 0.921 |
| 1990 | 0.667 | 0.913 |
| 2000 | 0.612 | 0.926 |
| 2010 | 0.665 | 0.913 |
| 2020 | 0.670 | 0.918 |
| 2030 | 0.630 | 0.925 |
| 2040 | 0.656 | 0.917 |
| 2050 | 0.646 | 0.913 |
| 2060 | 0.645 | 0.922 |
| 2070 | 0.671 | 0.929 |
| 2080 | 0.658 | 0.915 |
| 2090 | 0.659 | 0.926 |
| 2100 | 0.647 | 0.917 |
| 2110 | 0.709 | 0.920 |
| 2120 | 0.682 | 0.923 |
| 2130 | 0.637 | 0.904 |
| 2140 | 0.617 | 0.921 |
| 2150 | 0.679 | 0.927 |
| 2160 | 0.662 | 0.917 |
| 2170 | 0.679 | 0.908 |
| 2180 | 0.661 | 0.924 |
| 2190 | 0.643 | 0.921 |
| 2200 | 0.678 | 0.922 |
| 2210 | 0.658 | 0.921 |
| 2220 | 0.627 | 0.928 |
| 2230 | 0.644 | 0.920 |
| 2240 | 0.647 | 0.918 |
| 2250 | 0.647 | 0.916 |
| 2260 | 0.667 | 0.912 |
| 2270 | 0.683 | 0.924 |
| 2280 | 0.672 | 0.919 |
| 2290 | 0.624 | 0.907 |
| 2300 | 0.685 | 0.920 |

|      |       |       |
|------|-------|-------|
| 2310 | 0.685 | 0.930 |
| 2320 | 0.673 | 0.925 |
| 2330 | 0.680 | 0.922 |
| 2340 | 0.650 | 0.913 |
| 2350 | 0.662 | 0.913 |
| 2360 | 0.652 | 0.919 |
| 2370 | 0.642 | 0.925 |
| 2380 | 0.644 | 0.920 |
| 2390 | 0.701 | 0.929 |
| 2400 | 0.615 | 0.926 |
| 2410 | 0.657 | 0.924 |
| 2420 | 0.697 | 0.927 |
| 2430 | 0.704 | 0.933 |
| 2440 | 0.692 | 0.920 |
| 2450 | 0.715 | 0.917 |
| 2460 | 0.689 | 0.919 |
| 2470 | 0.694 | 0.931 |
| 2480 | 0.687 | 0.940 |
| 2490 | 0.620 | 0.939 |
| 2500 | 0.708 | 0.936 |
| 2510 | 0.689 | 0.919 |
| 2520 | 0.636 | 0.937 |
| 2530 | 0.697 | 0.919 |
| 2540 | 0.711 | 0.929 |
| 2550 | 0.681 | 0.928 |
| 2560 | 0.659 | 0.921 |
| 2570 | 0.676 | 0.921 |
| 2580 | 0.667 | 0.933 |
| 2590 | 0.697 | 0.929 |
| 2600 | 0.653 | 0.921 |
| 2610 | 0.656 | 0.924 |
| 2620 | 0.715 | 0.919 |
| 2630 | 0.650 | 0.924 |
| 2640 | 0.691 | 0.901 |
| 2650 | 0.674 | 0.930 |
| 2660 | 0.675 | 0.922 |
| 2670 | 0.665 | 0.918 |
| 2680 | 0.643 | 0.927 |
| 2690 | 0.654 | 0.921 |

|      |       |       |
|------|-------|-------|
| 2700 | 0.670 | 0.926 |
| 2710 | 0.676 | 0.933 |
| 2720 | 0.690 | 0.903 |
| 2730 | 0.636 | 0.937 |
| 2740 | 0.698 | 0.926 |
| 2750 | 0.663 | 0.924 |
| 2760 | 0.679 | 0.926 |
| 2770 | 0.686 | 0.922 |
| 2780 | 0.695 | 0.920 |
| 2790 | 0.632 | 0.926 |
| 2800 | 0.691 | 0.933 |
| 2810 | 0.672 | 0.920 |
| 2820 | 0.701 | 0.922 |
| 2830 | 0.671 | 0.917 |
| 2840 | 0.695 | 0.914 |
| 2850 | 0.661 | 0.928 |
| 2860 | 0.683 | 0.928 |
| 2870 | 0.706 | 0.919 |
| 2880 | 0.678 | 0.926 |
| 2890 | 0.676 | 0.911 |
| 2900 | 0.653 | 0.910 |
| 2910 | 0.674 | 0.925 |
| 2920 | 0.668 | 0.919 |
| 2930 | 0.655 | 0.927 |
| 2940 | 0.646 | 0.911 |
| 2950 | 0.643 | 0.942 |
| 2960 | 0.666 | 0.934 |
| 2970 | 0.625 | 0.924 |
| 2980 | 0.670 | 0.934 |
| 2990 | 0.661 | 0.920 |
| 3000 | 0.658 | 0.924 |
| 3010 | 0.651 | 0.919 |
| 3020 | 0.655 | 0.938 |
| 3030 | 0.667 | 0.922 |
| 3040 | 0.658 | 0.926 |
| 3050 | 0.664 | 0.927 |
| 3060 | 0.643 | 0.919 |
| 3070 | 0.642 | 0.919 |
| 3080 | 0.666 | 0.920 |



|      |       |       |
|------|-------|-------|
| 3090 | 0.645 | 0.915 |
| 3100 | 0.662 | 0.926 |
| 3110 | 0.698 | 0.923 |
| 3120 | 0.639 | 0.924 |
| 3130 | 0.699 | 0.926 |
| 3140 | 0.677 | 0.921 |
| 3150 | 0.656 | 0.922 |
| 3160 | 0.670 | 0.915 |
| 3170 | 0.673 | 0.922 |
| 3180 | 0.692 | 0.922 |
| 3190 | 0.640 | 0.905 |
| 3200 | 0.678 | 0.923 |
| 3210 | 0.644 | 0.920 |
| 3220 | 0.656 | 0.920 |
| 3230 | 0.679 | 0.916 |
| 3240 | 0.681 | 0.908 |
| 3250 | 0.646 | 0.920 |
| 3260 | 0.616 | 0.921 |
| 3270 | 0.708 | 0.916 |
| 3280 | 0.649 | 0.934 |
| 3290 | 0.700 | 0.914 |
| 3300 | 0.644 | 0.926 |
| 3310 | 0.659 | 0.927 |
| 3320 | 0.677 | 0.902 |
| 3330 | 0.647 | 0.927 |
| 3340 | 0.649 | 0.931 |
| 3350 | 0.670 | 0.933 |
| 3360 | 0.704 | 0.915 |
| 3370 | 0.660 | 0.914 |
| 3380 | 0.700 | 0.922 |
| 3390 | 0.643 | 0.925 |
| 3400 | 0.681 | 0.936 |
| 3410 | 0.683 | 0.921 |
| 3420 | 0.696 | 0.917 |
| 3430 | 0.670 | 0.914 |
| 3440 | 0.655 | 0.934 |
| 3450 | 0.663 | 0.917 |
| 3460 | 0.657 | 0.929 |
| 3470 | 0.679 | 0.927 |

|      |       |       |
|------|-------|-------|
| 3480 | 0.704 | 0.935 |
| 3490 | 0.701 | 0.925 |
| 3500 | 0.681 | 0.918 |
| 3510 | 0.674 | 0.903 |
| 3520 | 0.691 | 0.912 |
| 3530 | 0.698 | 0.926 |
| 3540 | 0.676 | 0.926 |
| 3550 | 0.708 | 0.900 |
| 3560 | 0.691 | 0.915 |
| 3570 | 0.672 | 0.930 |
| 3580 | 0.705 | 0.913 |
| 3590 | 0.660 | 0.923 |
| 3600 | 0.685 | 0.918 |
| 3610 | 0.653 | 0.917 |
| 3620 | 0.699 | 0.915 |
| 3630 | 0.663 | 0.932 |
| 3640 | 0.662 | 0.915 |
| 3650 | 0.681 | 0.934 |
| 3660 | 0.688 | 0.924 |
| 3670 | 0.650 | 0.933 |
| 3680 | 0.658 | 0.935 |
| 3690 | 0.643 | 0.930 |
| 3700 | 0.650 | 0.934 |
| 3710 | 0.694 | 0.923 |
| 3720 | 0.665 | 0.920 |
| 3730 | 0.655 | 0.923 |
| 3740 | 0.618 | 0.925 |
| 3750 | 0.656 | 0.922 |
| 3760 | 0.698 | 0.923 |
| 3770 | 0.678 | 0.922 |
| 3780 | 0.689 | 0.932 |
| 3790 | 0.658 | 0.924 |
| 3800 | 0.690 | 0.923 |
| 3810 | 0.639 | 0.915 |
| 3820 | 0.643 | 0.917 |
| 3830 | 0.659 | 0.910 |
| 3840 | 0.669 | 0.920 |
| 3850 | 0.609 | 0.907 |
| 3860 | 0.655 | 0.925 |

|      |       |       |
|------|-------|-------|
| 3870 | 0.685 | 0.919 |
| 3880 | 0.622 | 0.934 |
| 3890 | 0.678 | 0.916 |
| 3900 | 0.631 | 0.918 |
| 3910 | 0.666 | 0.923 |
| 3920 | 0.684 | 0.902 |
| 3930 | 0.667 | 0.901 |
| 3940 | 0.629 | 0.916 |
| 3950 | 0.642 | 0.925 |
| 3960 | 0.671 | 0.910 |
| 3970 | 0.647 | 0.939 |
| 3980 | 0.686 | 0.921 |
| 3990 | 0.665 | 0.925 |
| 4000 | 0.640 | 0.917 |
| 4010 | 0.678 | 0.928 |
| 4020 | 0.661 | 0.926 |
| 4030 | 0.664 | 0.921 |
| 4040 | 0.663 | 0.913 |
| 4050 | 0.689 | 0.926 |
| 4060 | 0.700 | 0.920 |
| 4070 | 0.639 | 0.914 |
| 4080 | 0.647 | 0.922 |
| 4090 | 0.633 | 0.930 |
| 4100 | 0.662 | 0.907 |
| 4110 | 0.661 | 0.930 |
| 4120 | 0.659 | 0.915 |
| 4130 | 0.666 | 0.923 |
| 4140 | 0.672 | 0.925 |
| 4150 | 0.689 | 0.932 |
| 4160 | 0.652 | 0.917 |
| 4170 | 0.621 | 0.920 |
| 4180 | 0.689 | 0.925 |
| 4190 | 0.679 | 0.911 |
| 4200 | 0.693 | 0.914 |
| 4210 | 0.687 | 0.923 |
| 4220 | 0.700 | 0.923 |
| 4230 | 0.663 | 0.916 |
| 4240 | 0.659 | 0.915 |
| 4250 | 0.667 | 0.895 |

|      |       |       |
|------|-------|-------|
| 4260 | 0.670 | 0.920 |
| 4270 | 0.657 | 0.920 |
| 4280 | 0.695 | 0.923 |
| 4290 | 0.687 | 0.908 |
| 4300 | 0.689 | 0.918 |
| 4310 | 0.693 | 0.913 |
| 4320 | 0.672 | 0.930 |
| 4330 | 0.728 | 0.924 |
| 4340 | 0.647 | 0.897 |
| 4350 | 0.702 | 0.927 |
| 4360 | 0.717 | 0.916 |
| 4370 | 0.708 | 0.913 |
| 4380 | 0.701 | 0.925 |
| 4390 | 0.641 | 0.912 |
| 4400 | 0.676 | 0.909 |
| 4410 | 0.689 | 0.918 |
| 4420 | 0.633 | 0.925 |
| 4430 | 0.709 | 0.908 |
| 4440 | 0.693 | 0.921 |
| 4450 | 0.652 | 0.909 |
| 4460 | 0.671 | 0.923 |
| 4470 | 0.690 | 0.926 |
| 4480 | 0.659 | 0.931 |
| 4490 | 0.682 | 0.924 |
| 4500 | 0.693 | 0.919 |
| 4510 | 0.688 | 0.923 |
| 4520 | 0.667 | 0.917 |
| 4530 | 0.649 | 0.917 |
| 4540 | 0.675 | 0.908 |
| 4550 | 0.694 | 0.908 |
| 4560 | 0.658 | 0.932 |
| 4570 | 0.644 | 0.936 |
| 4580 | 0.628 | 0.912 |
| 4590 | 0.657 | 0.917 |
| 4600 | 0.651 | 0.928 |
| 4610 | 0.646 | 0.927 |
| 4620 | 0.662 | 0.912 |
| 4630 | 0.685 | 0.922 |
| 4640 | 0.633 | 0.915 |

|      |       |       |
|------|-------|-------|
| 4650 | 0.660 | 0.924 |
| 4660 | 0.667 | 0.918 |
| 4670 | 0.674 | 0.920 |
| 4680 | 0.665 | 0.910 |
| 4690 | 0.701 | 0.922 |
| 4700 | 0.695 | 0.920 |
| 4710 | 0.661 | 0.916 |
| 4720 | 0.678 | 0.922 |
| 4730 | 0.635 | 0.924 |
| 4740 | 0.643 | 0.920 |
| 4750 | 0.635 | 0.913 |
| 4760 | 0.670 | 0.930 |
| 4770 | 0.698 | 0.930 |
| 4780 | 0.663 | 0.918 |
| 4790 | 0.665 | 0.916 |
| 4800 | 0.673 | 0.909 |
| 4810 | 0.647 | 0.916 |
| 4820 | 0.639 | 0.922 |
| 4830 | 0.655 | 0.921 |
| 4840 | 0.631 | 0.917 |
| 4850 | 0.659 | 0.919 |
| 4860 | 0.663 | 0.912 |
| 4870 | 0.662 | 0.912 |
| 4880 | 0.675 | 0.913 |
| 4890 | 0.615 | 0.923 |
| 4900 | 0.666 | 0.911 |
| 4910 | 0.633 | 0.923 |
| 4920 | 0.673 | 0.920 |
| 4930 | 0.667 | 0.902 |
| 4940 | 0.700 | 0.903 |
| 4950 | 0.671 | 0.915 |
| 4960 | 0.673 | 0.921 |
| 4970 | 0.670 | 0.909 |
| 4980 | 0.682 | 0.922 |
| 4990 | 0.620 | 0.913 |
| 5000 | 0.657 | 0.914 |

**(2) IFS second series**

| <b>Number of features</b> | <b><i>MCC</i></b> | <b><i>AUC</i></b> |
|---------------------------|-------------------|-------------------|
| 2001                      | 0.670             | 0.921             |
| 2002                      | 0.627             | 0.921             |
| 2003                      | 0.654             | 0.920             |
| 2004                      | 0.689             | 0.935             |
| 2005                      | 0.648             | 0.925             |
| 2006                      | 0.644             | 0.915             |
| 2007                      | 0.681             | 0.916             |
| 2008                      | 0.654             | 0.915             |
| 2009                      | 0.667             | 0.924             |
| 2010                      | 0.665             | 0.913             |
| 2011                      | 0.687             | 0.927             |
| 2012                      | 0.668             | 0.930             |
| 2013                      | 0.621             | 0.909             |
| 2014                      | 0.655             | 0.919             |
| 2015                      | 0.625             | 0.926             |
| 2016                      | 0.618             | 0.925             |
| 2017                      | 0.679             | 0.918             |
| 2018                      | 0.668             | 0.925             |
| 2019                      | 0.665             | 0.925             |
| 2020                      | 0.670             | 0.918             |
| 2021                      | 0.632             | 0.931             |
| 2022                      | 0.621             | 0.909             |
| 2023                      | 0.721             | 0.931             |
| 2024                      | 0.638             | 0.932             |
| 2025                      | 0.714             | 0.918             |
| 2026                      | 0.693             | 0.913             |
| 2027                      | 0.628             | 0.919             |
| 2028                      | 0.655             | 0.915             |
| 2029                      | 0.641             | 0.912             |
| 2030                      | 0.630             | 0.925             |
| 2031                      | 0.629             | 0.914             |
| 2032                      | 0.674             | 0.930             |
| 2033                      | 0.660             | 0.916             |
| 2034                      | 0.641             | 0.916             |
| 2035                      | 0.654             | 0.917             |
| 2036                      | 0.687             | 0.925             |
| 2037                      | 0.701             | 0.926             |

|      |       |       |
|------|-------|-------|
| 2038 | 0.669 | 0.913 |
| 2039 | 0.652 | 0.927 |
| 2040 | 0.656 | 0.917 |
| 2041 | 0.686 | 0.905 |
| 2042 | 0.644 | 0.920 |
| 2043 | 0.655 | 0.928 |
| 2044 | 0.729 | 0.920 |
| 2045 | 0.667 | 0.918 |
| 2046 | 0.679 | 0.915 |
| 2047 | 0.642 | 0.921 |
| 2048 | 0.639 | 0.912 |
| 2049 | 0.590 | 0.933 |
| 2050 | 0.646 | 0.913 |
| 2051 | 0.661 | 0.932 |
| 2052 | 0.639 | 0.907 |
| 2053 | 0.658 | 0.915 |
| 2054 | 0.665 | 0.919 |
| 2055 | 0.694 | 0.928 |
| 2056 | 0.640 | 0.909 |
| 2057 | 0.656 | 0.908 |
| 2058 | 0.673 | 0.920 |
| 2059 | 0.653 | 0.923 |
| 2060 | 0.645 | 0.922 |
| 2061 | 0.646 | 0.919 |
| 2062 | 0.617 | 0.918 |
| 2063 | 0.650 | 0.916 |
| 2064 | 0.618 | 0.926 |
| 2065 | 0.663 | 0.925 |
| 2066 | 0.656 | 0.922 |
| 2067 | 0.652 | 0.902 |
| 2068 | 0.650 | 0.923 |
| 2069 | 0.685 | 0.924 |
| 2070 | 0.671 | 0.929 |
| 2071 | 0.655 | 0.930 |
| 2072 | 0.654 | 0.919 |
| 2073 | 0.622 | 0.910 |
| 2074 | 0.698 | 0.912 |
| 2075 | 0.655 | 0.918 |
| 2076 | 0.655 | 0.918 |

|      |       |       |
|------|-------|-------|
| 2077 | 0.666 | 0.922 |
| 2078 | 0.681 | 0.915 |
| 2079 | 0.684 | 0.932 |
| 2080 | 0.658 | 0.915 |
| 2081 | 0.673 | 0.915 |
| 2082 | 0.685 | 0.921 |
| 2083 | 0.678 | 0.914 |
| 2084 | 0.659 | 0.914 |
| 2085 | 0.682 | 0.917 |
| 2086 | 0.693 | 0.925 |
| 2087 | 0.624 | 0.932 |
| 2088 | 0.680 | 0.921 |
| 2089 | 0.652 | 0.916 |
| 2090 | 0.659 | 0.926 |
| 2091 | 0.674 | 0.922 |
| 2092 | 0.668 | 0.923 |
| 2093 | 0.646 | 0.920 |
| 2094 | 0.654 | 0.911 |
| 2095 | 0.624 | 0.931 |
| 2096 | 0.722 | 0.925 |
| 2097 | 0.643 | 0.918 |
| 2098 | 0.675 | 0.926 |
| 2099 | 0.692 | 0.916 |
| 2100 | 0.647 | 0.917 |
| 2101 | 0.689 | 0.916 |
| 2102 | 0.687 | 0.921 |
| 2103 | 0.664 | 0.916 |
| 2104 | 0.628 | 0.913 |
| 2105 | 0.670 | 0.925 |
| 2106 | 0.695 | 0.913 |
| 2107 | 0.721 | 0.926 |
| 2108 | 0.716 | 0.909 |
| 2109 | 0.615 | 0.921 |
| 2110 | 0.709 | 0.920 |
| 2111 | 0.702 | 0.921 |
| 2112 | 0.639 | 0.920 |
| 2113 | 0.676 | 0.910 |
| 2114 | 0.679 | 0.907 |
| 2115 | 0.676 | 0.925 |



|      |       |       |
|------|-------|-------|
| 2116 | 0.686 | 0.915 |
| 2117 | 0.652 | 0.919 |
| 2118 | 0.685 | 0.925 |
| 2119 | 0.686 | 0.913 |
| 2120 | 0.682 | 0.923 |
| 2121 | 0.647 | 0.922 |
| 2122 | 0.618 | 0.915 |
| 2123 | 0.644 | 0.921 |
| 2124 | 0.686 | 0.919 |
| 2125 | 0.671 | 0.920 |
| 2126 | 0.645 | 0.923 |
| 2127 | 0.681 | 0.915 |
| 2128 | 0.693 | 0.922 |
| 2129 | 0.668 | 0.922 |
| 2130 | 0.637 | 0.904 |
| 2131 | 0.639 | 0.905 |
| 2132 | 0.651 | 0.920 |
| 2133 | 0.656 | 0.910 |
| 2134 | 0.662 | 0.919 |
| 2135 | 0.646 | 0.928 |
| 2136 | 0.690 | 0.917 |
| 2137 | 0.716 | 0.916 |
| 2138 | 0.709 | 0.914 |
| 2139 | 0.681 | 0.905 |
| 2140 | 0.617 | 0.921 |
| 2141 | 0.649 | 0.915 |
| 2142 | 0.662 | 0.918 |
| 2143 | 0.705 | 0.915 |
| 2144 | 0.644 | 0.923 |
| 2145 | 0.635 | 0.905 |
| 2146 | 0.633 | 0.927 |
| 2147 | 0.670 | 0.923 |
| 2148 | 0.653 | 0.925 |
| 2149 | 0.657 | 0.917 |
| 2150 | 0.679 | 0.927 |
| 2151 | 0.643 | 0.914 |
| 2152 | 0.637 | 0.914 |
| 2153 | 0.674 | 0.910 |
| 2154 | 0.648 | 0.924 |

|      |       |       |
|------|-------|-------|
| 2155 | 0.685 | 0.913 |
| 2156 | 0.704 | 0.921 |
| 2157 | 0.645 | 0.918 |
| 2158 | 0.689 | 0.916 |
| 2159 | 0.647 | 0.898 |
| 2160 | 0.662 | 0.917 |
| 2161 | 0.674 | 0.929 |
| 2162 | 0.648 | 0.920 |
| 2163 | 0.600 | 0.927 |
| 2164 | 0.697 | 0.915 |
| 2165 | 0.652 | 0.916 |
| 2166 | 0.688 | 0.925 |
| 2167 | 0.680 | 0.905 |
| 2168 | 0.637 | 0.926 |
| 2169 | 0.637 | 0.920 |
| 2170 | 0.679 | 0.908 |
| 2171 | 0.650 | 0.913 |
| 2172 | 0.627 | 0.916 |
| 2173 | 0.643 | 0.920 |
| 2174 | 0.681 | 0.914 |
| 2175 | 0.723 | 0.918 |
| 2176 | 0.678 | 0.914 |
| 2177 | 0.636 | 0.931 |
| 2178 | 0.692 | 0.921 |
| 2179 | 0.693 | 0.919 |
| 2180 | 0.661 | 0.924 |
| 2181 | 0.642 | 0.922 |
| 2182 | 0.631 | 0.921 |
| 2183 | 0.716 | 0.906 |
| 2184 | 0.631 | 0.919 |
| 2185 | 0.679 | 0.925 |
| 2186 | 0.622 | 0.924 |
| 2187 | 0.654 | 0.923 |
| 2188 | 0.680 | 0.931 |
| 2189 | 0.712 | 0.917 |
| 2190 | 0.643 | 0.921 |
| 2191 | 0.664 | 0.915 |
| 2192 | 0.663 | 0.922 |
| 2193 | 0.663 | 0.901 |

|      |       |       |
|------|-------|-------|
| 2194 | 0.656 | 0.914 |
| 2195 | 0.679 | 0.917 |
| 2196 | 0.678 | 0.920 |
| 2197 | 0.638 | 0.924 |
| 2198 | 0.696 | 0.929 |
| 2199 | 0.652 | 0.918 |
| 2200 | 0.678 | 0.922 |
| 2201 | 0.668 | 0.923 |
| 2202 | 0.646 | 0.927 |
| 2203 | 0.694 | 0.908 |
| 2204 | 0.681 | 0.911 |
| 2205 | 0.693 | 0.916 |
| 2206 | 0.615 | 0.925 |
| 2207 | 0.641 | 0.915 |
| 2208 | 0.646 | 0.914 |
| 2209 | 0.689 | 0.923 |
| 2210 | 0.658 | 0.921 |
| 2211 | 0.663 | 0.915 |
| 2212 | 0.653 | 0.914 |
| 2213 | 0.705 | 0.914 |
| 2214 | 0.616 | 0.918 |
| 2215 | 0.632 | 0.924 |
| 2216 | 0.682 | 0.931 |
| 2217 | 0.635 | 0.933 |
| 2218 | 0.690 | 0.912 |
| 2219 | 0.675 | 0.912 |
| 2220 | 0.627 | 0.928 |
| 2221 | 0.651 | 0.915 |
| 2222 | 0.632 | 0.908 |
| 2223 | 0.667 | 0.911 |
| 2224 | 0.674 | 0.919 |
| 2225 | 0.612 | 0.909 |
| 2226 | 0.650 | 0.909 |
| 2227 | 0.655 | 0.917 |
| 2228 | 0.673 | 0.925 |
| 2229 | 0.675 | 0.933 |
| 2230 | 0.644 | 0.920 |
| 2231 | 0.701 | 0.926 |
| 2232 | 0.679 | 0.921 |

|      |       |       |
|------|-------|-------|
| 2233 | 0.654 | 0.925 |
| 2234 | 0.652 | 0.914 |
| 2235 | 0.652 | 0.908 |
| 2236 | 0.708 | 0.927 |
| 2237 | 0.641 | 0.929 |
| 2238 | 0.649 | 0.918 |
| 2239 | 0.657 | 0.922 |
| 2240 | 0.647 | 0.918 |
| 2241 | 0.664 | 0.920 |
| 2242 | 0.653 | 0.915 |
| 2243 | 0.666 | 0.919 |
| 2244 | 0.639 | 0.921 |
| 2245 | 0.654 | 0.912 |
| 2246 | 0.640 | 0.926 |
| 2247 | 0.657 | 0.910 |
| 2248 | 0.664 | 0.923 |
| 2249 | 0.685 | 0.924 |
| 2250 | 0.647 | 0.916 |
| 2251 | 0.679 | 0.919 |
| 2252 | 0.666 | 0.916 |
| 2253 | 0.646 | 0.922 |
| 2254 | 0.660 | 0.916 |
| 2255 | 0.704 | 0.917 |
| 2256 | 0.648 | 0.921 |
| 2257 | 0.646 | 0.921 |
| 2258 | 0.700 | 0.917 |
| 2259 | 0.683 | 0.912 |
| 2260 | 0.667 | 0.912 |
| 2261 | 0.687 | 0.921 |
| 2262 | 0.695 | 0.912 |
| 2263 | 0.694 | 0.910 |
| 2264 | 0.665 | 0.922 |
| 2265 | 0.669 | 0.926 |
| 2266 | 0.662 | 0.927 |
| 2267 | 0.639 | 0.918 |
| 2268 | 0.673 | 0.914 |
| 2269 | 0.674 | 0.928 |
| 2270 | 0.683 | 0.924 |
| 2271 | 0.696 | 0.908 |

|      |       |       |
|------|-------|-------|
| 2272 | 0.681 | 0.919 |
| 2273 | 0.635 | 0.924 |
| 2274 | 0.651 | 0.926 |
| 2275 | 0.654 | 0.920 |
| 2276 | 0.629 | 0.911 |
| 2277 | 0.637 | 0.903 |
| 2278 | 0.647 | 0.925 |
| 2279 | 0.611 | 0.930 |
| 2280 | 0.672 | 0.919 |
| 2281 | 0.648 | 0.915 |
| 2282 | 0.631 | 0.913 |
| 2283 | 0.683 | 0.900 |
| 2284 | 0.666 | 0.913 |
| 2285 | 0.633 | 0.916 |
| 2286 | 0.708 | 0.932 |
| 2287 | 0.709 | 0.926 |
| 2288 | 0.660 | 0.911 |
| 2289 | 0.671 | 0.931 |
| 2290 | 0.624 | 0.907 |
| 2291 | 0.706 | 0.907 |
| 2292 | 0.625 | 0.907 |
| 2293 | 0.670 | 0.921 |
| 2294 | 0.697 | 0.909 |
| 2295 | 0.721 | 0.913 |
| 2296 | 0.650 | 0.924 |
| 2297 | 0.681 | 0.916 |
| 2298 | 0.682 | 0.925 |
| 2299 | 0.668 | 0.900 |
| 2300 | 0.685 | 0.920 |
| 2301 | 0.658 | 0.920 |
| 2302 | 0.678 | 0.925 |
| 2303 | 0.639 | 0.918 |
| 2304 | 0.693 | 0.919 |
| 2305 | 0.659 | 0.914 |
| 2306 | 0.654 | 0.928 |
| 2307 | 0.693 | 0.930 |
| 2308 | 0.677 | 0.908 |
| 2309 | 0.667 | 0.914 |
| 2310 | 0.685 | 0.930 |

|      |       |       |
|------|-------|-------|
| 2311 | 0.685 | 0.919 |
| 2312 | 0.685 | 0.909 |
| 2313 | 0.638 | 0.928 |
| 2314 | 0.662 | 0.918 |
| 2315 | 0.648 | 0.911 |
| 2316 | 0.664 | 0.926 |
| 2317 | 0.710 | 0.911 |
| 2318 | 0.635 | 0.925 |
| 2319 | 0.654 | 0.933 |
| 2320 | 0.673 | 0.925 |
| 2321 | 0.667 | 0.926 |
| 2322 | 0.696 | 0.910 |
| 2323 | 0.667 | 0.923 |
| 2324 | 0.688 | 0.936 |
| 2325 | 0.679 | 0.918 |
| 2326 | 0.705 | 0.927 |
| 2327 | 0.712 | 0.918 |
| 2328 | 0.697 | 0.913 |
| 2329 | 0.667 | 0.927 |
| 2330 | 0.680 | 0.922 |
| 2331 | 0.723 | 0.914 |
| 2332 | 0.672 | 0.915 |
| 2333 | 0.698 | 0.931 |
| 2334 | 0.682 | 0.919 |
| 2335 | 0.662 | 0.909 |
| 2336 | 0.669 | 0.918 |
| 2337 | 0.685 | 0.905 |
| 2338 | 0.696 | 0.920 |
| 2339 | 0.706 | 0.926 |
| 2340 | 0.650 | 0.913 |
| 2341 | 0.671 | 0.915 |
| 2342 | 0.626 | 0.913 |
| 2343 | 0.633 | 0.923 |
| 2344 | 0.682 | 0.924 |
| 2345 | 0.695 | 0.929 |
| 2346 | 0.691 | 0.930 |
| 2347 | 0.651 | 0.925 |
| 2348 | 0.650 | 0.915 |
| 2349 | 0.670 | 0.919 |

|      |       |       |
|------|-------|-------|
| 2350 | 0.662 | 0.913 |
| 2351 | 0.641 | 0.921 |
| 2352 | 0.723 | 0.910 |
| 2353 | 0.688 | 0.910 |
| 2354 | 0.685 | 0.918 |
| 2355 | 0.666 | 0.927 |
| 2356 | 0.687 | 0.917 |
| 2357 | 0.637 | 0.911 |
| 2358 | 0.708 | 0.915 |
| 2359 | 0.640 | 0.923 |
| 2360 | 0.652 | 0.919 |
| 2361 | 0.644 | 0.928 |
| 2362 | 0.679 | 0.933 |
| 2363 | 0.654 | 0.914 |
| 2364 | 0.616 | 0.935 |
| 2365 | 0.675 | 0.926 |
| 2366 | 0.646 | 0.924 |
| 2367 | 0.647 | 0.909 |
| 2368 | 0.667 | 0.913 |
| 2369 | 0.646 | 0.924 |
| 2370 | 0.642 | 0.925 |
| 2371 | 0.675 | 0.914 |
| 2372 | 0.705 | 0.926 |
| 2373 | 0.675 | 0.930 |
| 2374 | 0.678 | 0.928 |
| 2375 | 0.605 | 0.906 |
| 2376 | 0.629 | 0.920 |
| 2377 | 0.699 | 0.936 |
| 2378 | 0.643 | 0.916 |
| 2379 | 0.695 | 0.927 |
| 2380 | 0.644 | 0.920 |
| 2381 | 0.657 | 0.928 |
| 2382 | 0.711 | 0.921 |
| 2383 | 0.701 | 0.922 |
| 2384 | 0.665 | 0.910 |
| 2385 | 0.704 | 0.920 |
| 2386 | 0.688 | 0.925 |
| 2387 | 0.684 | 0.925 |
| 2388 | 0.620 | 0.933 |

|      |       |       |
|------|-------|-------|
| 2389 | 0.689 | 0.925 |
| 2390 | 0.701 | 0.929 |
| 2391 | 0.658 | 0.930 |
| 2392 | 0.701 | 0.918 |
| 2393 | 0.684 | 0.924 |
| 2394 | 0.671 | 0.927 |
| 2395 | 0.696 | 0.925 |
| 2396 | 0.698 | 0.937 |
| 2397 | 0.684 | 0.929 |
| 2398 | 0.713 | 0.917 |
| 2399 | 0.660 | 0.928 |
| 2400 | 0.615 | 0.926 |
| 2401 | 0.716 | 0.929 |
| 2402 | 0.653 | 0.931 |
| 2403 | 0.675 | 0.926 |
| 2404 | 0.666 | 0.934 |
| 2405 | 0.669 | 0.922 |
| 2406 | 0.675 | 0.923 |
| 2407 | 0.643 | 0.906 |
| 2408 | 0.708 | 0.923 |
| 2409 | 0.685 | 0.920 |
| 2410 | 0.657 | 0.924 |
| 2411 | 0.639 | 0.924 |
| 2412 | 0.666 | 0.931 |
| 2413 | 0.685 | 0.915 |
| 2414 | 0.669 | 0.933 |
| 2415 | 0.693 | 0.910 |
| 2416 | 0.723 | 0.926 |
| 2417 | 0.641 | 0.924 |
| 2418 | 0.686 | 0.919 |
| 2419 | 0.671 | 0.922 |
| 2420 | 0.697 | 0.927 |
| 2421 | 0.706 | 0.929 |
| 2422 | 0.628 | 0.922 |
| 2423 | 0.683 | 0.940 |
| 2424 | 0.677 | 0.917 |
| 2425 | 0.684 | 0.913 |
| 2426 | 0.670 | 0.925 |
| 2427 | 0.650 | 0.917 |



|      |       |       |
|------|-------|-------|
| 2428 | 0.649 | 0.925 |
| 2429 | 0.702 | 0.922 |
| 2430 | 0.704 | 0.933 |
| 2431 | 0.700 | 0.926 |
| 2432 | 0.712 | 0.920 |
| 2433 | 0.660 | 0.929 |
| 2434 | 0.705 | 0.903 |
| 2435 | 0.655 | 0.926 |
| 2436 | 0.640 | 0.926 |
| 2437 | 0.687 | 0.936 |
| 2438 | 0.716 | 0.917 |
| 2439 | 0.661 | 0.914 |
| 2440 | 0.692 | 0.920 |
| 2441 | 0.702 | 0.922 |
| 2442 | 0.654 | 0.919 |
| 2443 | 0.679 | 0.920 |
| 2444 | 0.712 | 0.916 |
| 2445 | 0.717 | 0.923 |
| 2446 | 0.649 | 0.931 |
| 2447 | 0.687 | 0.919 |
| 2448 | 0.701 | 0.927 |
| 2449 | 0.708 | 0.923 |
| 2450 | 0.715 | 0.917 |
| 2451 | 0.679 | 0.918 |
| 2452 | 0.699 | 0.926 |
| 2453 | 0.678 | 0.928 |
| 2454 | 0.663 | 0.937 |
| 2455 | 0.671 | 0.914 |
| 2456 | 0.682 | 0.912 |
| 2457 | 0.649 | 0.937 |
| 2458 | 0.659 | 0.919 |
| 2459 | 0.708 | 0.925 |
| 2460 | 0.689 | 0.919 |
| 2461 | 0.709 | 0.919 |
| 2462 | 0.684 | 0.934 |
| 2463 | 0.642 | 0.921 |
| 2464 | 0.660 | 0.923 |
| 2465 | 0.704 | 0.928 |
| 2466 | 0.703 | 0.930 |

|      |       |       |
|------|-------|-------|
| 2467 | 0.666 | 0.927 |
| 2468 | 0.679 | 0.916 |
| 2469 | 0.649 | 0.921 |
| 2470 | 0.694 | 0.931 |
| 2471 | 0.639 | 0.929 |
| 2472 | 0.713 | 0.921 |
| 2473 | 0.679 | 0.931 |
| 2474 | 0.644 | 0.927 |
| 2475 | 0.696 | 0.919 |
| 2476 | 0.667 | 0.931 |
| 2477 | 0.675 | 0.927 |
| 2478 | 0.647 | 0.923 |
| 2479 | 0.688 | 0.919 |
| 2480 | 0.687 | 0.940 |
| 2481 | 0.673 | 0.929 |
| 2482 | 0.694 | 0.920 |
| 2483 | 0.666 | 0.932 |
| 2484 | 0.670 | 0.919 |
| 2485 | 0.669 | 0.926 |
| 2486 | 0.679 | 0.927 |
| 2487 | 0.666 | 0.926 |
| 2488 | 0.694 | 0.918 |
| 2489 | 0.728 | 0.925 |
| 2490 | 0.620 | 0.939 |
| 2491 | 0.675 | 0.913 |
| 2492 | 0.712 | 0.933 |
| 2493 | 0.642 | 0.933 |
| 2494 | 0.672 | 0.924 |
| 2495 | 0.655 | 0.919 |
| 2496 | 0.667 | 0.919 |
| 2497 | 0.689 | 0.925 |
| 2498 | 0.705 | 0.922 |
| 2499 | 0.691 | 0.916 |
| 2500 | 0.708 | 0.936 |
| 2501 | 0.673 | 0.931 |
| 2502 | 0.633 | 0.916 |
| 2503 | 0.706 | 0.927 |
| 2504 | 0.708 | 0.920 |
| 2505 | 0.640 | 0.931 |

|      |       |       |
|------|-------|-------|
| 2506 | 0.661 | 0.915 |
| 2507 | 0.675 | 0.921 |
| 2508 | 0.679 | 0.926 |
| 2509 | 0.707 | 0.916 |
| 2510 | 0.689 | 0.919 |
| 2511 | 0.633 | 0.915 |
| 2512 | 0.693 | 0.925 |
| 2513 | 0.687 | 0.908 |
| 2514 | 0.652 | 0.927 |
| 2515 | 0.685 | 0.920 |
| 2516 | 0.698 | 0.944 |
| 2517 | 0.678 | 0.929 |
| 2518 | 0.731 | 0.924 |
| 2519 | 0.673 | 0.921 |
| 2520 | 0.636 | 0.937 |
| 2521 | 0.678 | 0.926 |
| 2522 | 0.657 | 0.927 |
| 2523 | 0.663 | 0.926 |
| 2524 | 0.678 | 0.920 |
| 2525 | 0.674 | 0.925 |
| 2526 | 0.675 | 0.925 |
| 2527 | 0.689 | 0.929 |
| 2528 | 0.705 | 0.928 |
| 2529 | 0.693 | 0.923 |
| 2530 | 0.697 | 0.919 |
| 2531 | 0.689 | 0.932 |
| 2532 | 0.671 | 0.929 |
| 2533 | 0.687 | 0.925 |
| 2534 | 0.648 | 0.916 |
| 2535 | 0.651 | 0.914 |
| 2536 | 0.654 | 0.922 |
| 2537 | 0.705 | 0.907 |
| 2538 | 0.684 | 0.929 |
| 2539 | 0.675 | 0.919 |
| 2540 | 0.711 | 0.929 |
| 2541 | 0.637 | 0.927 |
| 2542 | 0.693 | 0.917 |
| 2543 | 0.667 | 0.918 |
| 2544 | 0.663 | 0.929 |

|      |       |       |
|------|-------|-------|
| 2545 | 0.670 | 0.917 |
| 2546 | 0.685 | 0.932 |
| 2547 | 0.668 | 0.925 |
| 2548 | 0.696 | 0.918 |
| 2549 | 0.656 | 0.932 |
| 2550 | 0.681 | 0.928 |
| 2551 | 0.657 | 0.922 |
| 2552 | 0.679 | 0.927 |
| 2553 | 0.659 | 0.916 |
| 2554 | 0.704 | 0.920 |
| 2555 | 0.705 | 0.928 |
| 2556 | 0.640 | 0.926 |
| 2557 | 0.698 | 0.917 |
| 2558 | 0.692 | 0.927 |
| 2559 | 0.624 | 0.935 |
| 2560 | 0.659 | 0.921 |
| 2561 | 0.702 | 0.922 |
| 2562 | 0.704 | 0.923 |
| 2563 | 0.679 | 0.915 |
| 2564 | 0.722 | 0.926 |
| 2565 | 0.662 | 0.928 |
| 2566 | 0.670 | 0.927 |
| 2567 | 0.681 | 0.930 |
| 2568 | 0.654 | 0.924 |
| 2569 | 0.704 | 0.937 |
| 2570 | 0.676 | 0.921 |
| 2571 | 0.664 | 0.920 |
| 2572 | 0.678 | 0.922 |
| 2573 | 0.696 | 0.925 |
| 2574 | 0.690 | 0.923 |
| 2575 | 0.716 | 0.935 |
| 2576 | 0.639 | 0.932 |
| 2577 | 0.702 | 0.927 |
| 2578 | 0.719 | 0.920 |
| 2579 | 0.655 | 0.918 |
| 2580 | 0.667 | 0.933 |
| 2581 | 0.678 | 0.913 |
| 2582 | 0.677 | 0.921 |
| 2583 | 0.682 | 0.918 |

|      |       |       |
|------|-------|-------|
| 2584 | 0.679 | 0.923 |
| 2585 | 0.662 | 0.919 |
| 2586 | 0.686 | 0.930 |
| 2587 | 0.679 | 0.917 |
| 2588 | 0.694 | 0.926 |
| 2589 | 0.711 | 0.910 |
| 2590 | 0.697 | 0.929 |
| 2591 | 0.664 | 0.917 |
| 2592 | 0.670 | 0.925 |
| 2593 | 0.666 | 0.929 |
| 2594 | 0.711 | 0.929 |
| 2595 | 0.662 | 0.931 |
| 2596 | 0.688 | 0.911 |
| 2597 | 0.652 | 0.908 |
| 2598 | 0.658 | 0.920 |
| 2599 | 0.687 | 0.919 |
| 2600 | 0.653 | 0.921 |
| 2601 | 0.673 | 0.924 |
| 2602 | 0.671 | 0.919 |
| 2603 | 0.686 | 0.914 |
| 2604 | 0.661 | 0.927 |
| 2605 | 0.621 | 0.925 |
| 2606 | 0.681 | 0.924 |
| 2607 | 0.642 | 0.918 |
| 2608 | 0.664 | 0.920 |
| 2609 | 0.671 | 0.911 |
| 2610 | 0.656 | 0.924 |
| 2611 | 0.662 | 0.930 |
| 2612 | 0.689 | 0.932 |
| 2613 | 0.648 | 0.930 |
| 2614 | 0.652 | 0.927 |
| 2615 | 0.652 | 0.913 |
| 2616 | 0.687 | 0.923 |
| 2617 | 0.689 | 0.917 |
| 2618 | 0.737 | 0.930 |
| 2619 | 0.634 | 0.912 |
| 2620 | 0.715 | 0.919 |
| 2621 | 0.679 | 0.927 |
| 2622 | 0.637 | 0.930 |

|      |       |       |
|------|-------|-------|
| 2623 | 0.684 | 0.926 |
| 2624 | 0.666 | 0.932 |
| 2625 | 0.685 | 0.926 |
| 2626 | 0.682 | 0.918 |
| 2627 | 0.693 | 0.934 |
| 2628 | 0.699 | 0.922 |
| 2629 | 0.680 | 0.930 |
| 2630 | 0.650 | 0.924 |
| 2631 | 0.685 | 0.916 |
| 2632 | 0.709 | 0.932 |
| 2633 | 0.692 | 0.909 |
| 2634 | 0.673 | 0.933 |
| 2635 | 0.687 | 0.912 |
| 2636 | 0.650 | 0.915 |
| 2637 | 0.723 | 0.916 |
| 2638 | 0.671 | 0.916 |
| 2639 | 0.719 | 0.934 |
| 2640 | 0.691 | 0.901 |
| 2641 | 0.666 | 0.926 |
| 2642 | 0.652 | 0.932 |
| 2643 | 0.642 | 0.917 |
| 2644 | 0.685 | 0.917 |
| 2645 | 0.679 | 0.927 |
| 2646 | 0.682 | 0.923 |
| 2647 | 0.687 | 0.924 |
| 2648 | 0.681 | 0.920 |
| 2649 | 0.701 | 0.930 |
| 2650 | 0.674 | 0.930 |
| 2651 | 0.667 | 0.928 |
| 2652 | 0.708 | 0.927 |
| 2653 | 0.673 | 0.919 |
| 2654 | 0.687 | 0.915 |
| 2655 | 0.708 | 0.922 |
| 2656 | 0.654 | 0.922 |
| 2657 | 0.656 | 0.918 |
| 2658 | 0.666 | 0.929 |
| 2659 | 0.700 | 0.919 |
| 2660 | 0.675 | 0.922 |
| 2661 | 0.690 | 0.918 |

|      |       |       |
|------|-------|-------|
| 2662 | 0.671 | 0.918 |
| 2663 | 0.712 | 0.920 |
| 2664 | 0.670 | 0.922 |
| 2665 | 0.646 | 0.919 |
| 2666 | 0.677 | 0.933 |
| 2667 | 0.721 | 0.920 |
| 2668 | 0.681 | 0.928 |
| 2669 | 0.658 | 0.924 |
| 2670 | 0.665 | 0.918 |
| 2671 | 0.662 | 0.918 |
| 2672 | 0.678 | 0.914 |
| 2673 | 0.666 | 0.919 |
| 2674 | 0.641 | 0.918 |
| 2675 | 0.631 | 0.920 |
| 2676 | 0.662 | 0.908 |
| 2677 | 0.717 | 0.925 |
| 2678 | 0.648 | 0.925 |
| 2679 | 0.655 | 0.926 |
| 2680 | 0.643 | 0.927 |
| 2681 | 0.672 | 0.918 |
| 2682 | 0.672 | 0.924 |
| 2683 | 0.683 | 0.920 |
| 2684 | 0.647 | 0.925 |
| 2685 | 0.686 | 0.926 |
| 2686 | 0.681 | 0.923 |
| 2687 | 0.694 | 0.927 |
| 2688 | 0.694 | 0.926 |
| 2689 | 0.681 | 0.911 |
| 2690 | 0.654 | 0.921 |
| 2691 | 0.683 | 0.920 |
| 2692 | 0.710 | 0.916 |
| 2693 | 0.674 | 0.926 |
| 2694 | 0.668 | 0.929 |
| 2695 | 0.684 | 0.910 |
| 2696 | 0.682 | 0.917 |
| 2697 | 0.667 | 0.924 |
| 2698 | 0.675 | 0.920 |
| 2699 | 0.697 | 0.933 |
| 2700 | 0.670 | 0.926 |

|      |       |       |
|------|-------|-------|
| 2701 | 0.666 | 0.913 |
| 2702 | 0.701 | 0.924 |
| 2703 | 0.686 | 0.918 |
| 2704 | 0.686 | 0.925 |
| 2705 | 0.701 | 0.912 |
| 2706 | 0.595 | 0.915 |
| 2707 | 0.691 | 0.921 |
| 2708 | 0.650 | 0.916 |
| 2709 | 0.674 | 0.908 |
| 2710 | 0.676 | 0.933 |
| 2711 | 0.659 | 0.931 |
| 2712 | 0.652 | 0.919 |
| 2713 | 0.659 | 0.926 |
| 2714 | 0.659 | 0.919 |
| 2715 | 0.662 | 0.935 |
| 2716 | 0.685 | 0.919 |
| 2717 | 0.682 | 0.929 |
| 2718 | 0.654 | 0.920 |
| 2719 | 0.667 | 0.925 |
| 2720 | 0.690 | 0.903 |
| 2721 | 0.642 | 0.921 |
| 2722 | 0.662 | 0.928 |
| 2723 | 0.671 | 0.914 |
| 2724 | 0.640 | 0.916 |
| 2725 | 0.680 | 0.917 |
| 2726 | 0.700 | 0.931 |
| 2727 | 0.670 | 0.923 |
| 2728 | 0.629 | 0.923 |
| 2729 | 0.674 | 0.924 |
| 2730 | 0.636 | 0.937 |
| 2731 | 0.678 | 0.921 |
| 2732 | 0.691 | 0.939 |
| 2733 | 0.675 | 0.926 |
| 2734 | 0.646 | 0.933 |
| 2735 | 0.691 | 0.924 |
| 2736 | 0.693 | 0.921 |
| 2737 | 0.748 | 0.915 |
| 2738 | 0.667 | 0.935 |
| 2739 | 0.702 | 0.931 |



|      |       |       |
|------|-------|-------|
| 2740 | 0.698 | 0.926 |
| 2741 | 0.673 | 0.929 |
| 2742 | 0.702 | 0.926 |
| 2743 | 0.716 | 0.936 |
| 2744 | 0.673 | 0.920 |
| 2745 | 0.683 | 0.932 |
| 2746 | 0.669 | 0.920 |
| 2747 | 0.744 | 0.933 |
| 2748 | 0.697 | 0.930 |
| 2749 | 0.682 | 0.929 |
| 2750 | 0.663 | 0.924 |
| 2751 | 0.694 | 0.937 |
| 2752 | 0.650 | 0.921 |
| 2753 | 0.709 | 0.927 |
| 2754 | 0.661 | 0.935 |
| 2755 | 0.668 | 0.922 |
| 2756 | 0.716 | 0.922 |
| 2757 | 0.704 | 0.923 |
| 2758 | 0.666 | 0.922 |
| 2759 | 0.653 | 0.916 |
| 2760 | 0.679 | 0.926 |
| 2761 | 0.698 | 0.919 |
| 2762 | 0.683 | 0.925 |
| 2763 | 0.634 | 0.916 |
| 2764 | 0.665 | 0.922 |
| 2765 | 0.689 | 0.922 |
| 2766 | 0.689 | 0.911 |
| 2767 | 0.697 | 0.937 |
| 2768 | 0.670 | 0.928 |
| 2769 | 0.664 | 0.922 |
| 2770 | 0.686 | 0.922 |
| 2771 | 0.673 | 0.926 |
| 2772 | 0.667 | 0.930 |
| 2773 | 0.681 | 0.924 |
| 2774 | 0.687 | 0.915 |
| 2775 | 0.673 | 0.927 |
| 2776 | 0.679 | 0.906 |
| 2777 | 0.693 | 0.934 |
| 2778 | 0.628 | 0.923 |

|      |       |       |
|------|-------|-------|
| 2779 | 0.707 | 0.927 |
| 2780 | 0.695 | 0.920 |
| 2781 | 0.686 | 0.930 |
| 2782 | 0.715 | 0.918 |
| 2783 | 0.714 | 0.924 |
| 2784 | 0.702 | 0.918 |
| 2785 | 0.661 | 0.924 |
| 2786 | 0.691 | 0.929 |
| 2787 | 0.671 | 0.927 |
| 2788 | 0.683 | 0.924 |
| 2789 | 0.685 | 0.922 |
| 2790 | 0.632 | 0.926 |
| 2791 | 0.694 | 0.915 |
| 2792 | 0.636 | 0.924 |
| 2793 | 0.722 | 0.915 |
| 2794 | 0.688 | 0.926 |
| 2795 | 0.667 | 0.922 |
| 2796 | 0.677 | 0.926 |
| 2797 | 0.647 | 0.920 |
| 2798 | 0.679 | 0.918 |
| 2799 | 0.661 | 0.922 |
| 2800 | 0.691 | 0.933 |
| 2801 | 0.662 | 0.923 |
| 2802 | 0.689 | 0.928 |
| 2803 | 0.664 | 0.933 |
| 2804 | 0.590 | 0.928 |
| 2805 | 0.697 | 0.928 |
| 2806 | 0.657 | 0.928 |
| 2807 | 0.679 | 0.917 |
| 2808 | 0.687 | 0.923 |
| 2809 | 0.639 | 0.921 |
| 2810 | 0.672 | 0.920 |
| 2811 | 0.693 | 0.933 |
| 2812 | 0.628 | 0.919 |
| 2813 | 0.685 | 0.925 |
| 2814 | 0.693 | 0.923 |
| 2815 | 0.712 | 0.915 |
| 2816 | 0.663 | 0.920 |
| 2817 | 0.687 | 0.920 |

|      |       |       |
|------|-------|-------|
| 2818 | 0.705 | 0.938 |
| 2819 | 0.703 | 0.916 |
| 2820 | 0.701 | 0.922 |
| 2821 | 0.670 | 0.925 |
| 2822 | 0.686 | 0.928 |
| 2823 | 0.664 | 0.935 |
| 2824 | 0.712 | 0.920 |
| 2825 | 0.706 | 0.912 |
| 2826 | 0.653 | 0.916 |
| 2827 | 0.650 | 0.921 |
| 2828 | 0.671 | 0.922 |
| 2829 | 0.665 | 0.924 |
| 2830 | 0.671 | 0.917 |
| 2831 | 0.686 | 0.909 |
| 2832 | 0.689 | 0.925 |
| 2833 | 0.663 | 0.927 |
| 2834 | 0.705 | 0.921 |
| 2835 | 0.709 | 0.924 |
| 2836 | 0.706 | 0.926 |
| 2837 | 0.643 | 0.911 |
| 2838 | 0.718 | 0.922 |
| 2839 | 0.713 | 0.922 |
| 2840 | 0.695 | 0.914 |
| 2841 | 0.682 | 0.932 |
| 2842 | 0.677 | 0.921 |
| 2843 | 0.660 | 0.927 |
| 2844 | 0.726 | 0.935 |
| 2845 | 0.698 | 0.922 |
| 2846 | 0.662 | 0.927 |
| 2847 | 0.693 | 0.922 |
| 2848 | 0.705 | 0.926 |
| 2849 | 0.665 | 0.921 |
| 2850 | 0.661 | 0.928 |
| 2851 | 0.655 | 0.931 |
| 2852 | 0.712 | 0.916 |
| 2853 | 0.675 | 0.920 |
| 2854 | 0.713 | 0.921 |
| 2855 | 0.653 | 0.924 |
| 2856 | 0.720 | 0.923 |

|      |       |       |
|------|-------|-------|
| 2857 | 0.680 | 0.922 |
| 2858 | 0.655 | 0.918 |
| 2859 | 0.687 | 0.924 |
| 2860 | 0.683 | 0.928 |
| 2861 | 0.644 | 0.932 |
| 2862 | 0.735 | 0.936 |
| 2863 | 0.685 | 0.925 |
| 2864 | 0.659 | 0.921 |
| 2865 | 0.658 | 0.932 |
| 2866 | 0.665 | 0.922 |
| 2867 | 0.676 | 0.922 |
| 2868 | 0.718 | 0.918 |
| 2869 | 0.717 | 0.918 |
| 2870 | 0.706 | 0.919 |
| 2871 | 0.670 | 0.913 |
| 2872 | 0.643 | 0.921 |
| 2873 | 0.651 | 0.920 |
| 2874 | 0.664 | 0.918 |
| 2875 | 0.702 | 0.914 |
| 2876 | 0.693 | 0.922 |
| 2877 | 0.660 | 0.915 |
| 2878 | 0.660 | 0.919 |
| 2879 | 0.670 | 0.920 |
| 2880 | 0.678 | 0.926 |
| 2881 | 0.658 | 0.916 |
| 2882 | 0.740 | 0.925 |
| 2883 | 0.656 | 0.925 |
| 2884 | 0.647 | 0.929 |
| 2885 | 0.695 | 0.919 |
| 2886 | 0.675 | 0.918 |
| 2887 | 0.670 | 0.932 |
| 2888 | 0.641 | 0.923 |
| 2889 | 0.661 | 0.918 |
| 2890 | 0.676 | 0.911 |
| 2891 | 0.606 | 0.924 |
| 2892 | 0.663 | 0.922 |
| 2893 | 0.672 | 0.930 |
| 2894 | 0.670 | 0.919 |
| 2895 | 0.690 | 0.924 |

|      |       |       |
|------|-------|-------|
| 2896 | 0.674 | 0.932 |
| 2897 | 0.688 | 0.917 |
| 2898 | 0.652 | 0.927 |
| 2899 | 0.684 | 0.935 |
| 2900 | 0.653 | 0.910 |
| 2901 | 0.681 | 0.929 |
| 2902 | 0.686 | 0.922 |
| 2903 | 0.704 | 0.925 |
| 2904 | 0.670 | 0.921 |
| 2905 | 0.636 | 0.925 |
| 2906 | 0.624 | 0.926 |
| 2907 | 0.649 | 0.920 |
| 2908 | 0.652 | 0.926 |
| 2909 | 0.643 | 0.931 |
| 2910 | 0.674 | 0.925 |
| 2911 | 0.669 | 0.927 |
| 2912 | 0.662 | 0.908 |
| 2913 | 0.668 | 0.922 |
| 2914 | 0.687 | 0.924 |
| 2915 | 0.683 | 0.923 |
| 2916 | 0.667 | 0.917 |
| 2917 | 0.662 | 0.927 |
| 2918 | 0.723 | 0.919 |
| 2919 | 0.655 | 0.922 |
| 2920 | 0.668 | 0.919 |
| 2921 | 0.624 | 0.935 |
| 2922 | 0.640 | 0.930 |
| 2923 | 0.681 | 0.914 |
| 2924 | 0.674 | 0.929 |
| 2925 | 0.736 | 0.912 |
| 2926 | 0.684 | 0.920 |
| 2927 | 0.673 | 0.918 |
| 2928 | 0.693 | 0.929 |
| 2929 | 0.676 | 0.928 |
| 2930 | 0.655 | 0.927 |
| 2931 | 0.667 | 0.924 |
| 2932 | 0.652 | 0.930 |
| 2933 | 0.658 | 0.916 |
| 2934 | 0.666 | 0.934 |

|      |       |       |
|------|-------|-------|
| 2935 | 0.713 | 0.914 |
| 2936 | 0.664 | 0.924 |
| 2937 | 0.679 | 0.926 |
| 2938 | 0.658 | 0.923 |
| 2939 | 0.698 | 0.919 |
| 2940 | 0.646 | 0.911 |
| 2941 | 0.701 | 0.917 |
| 2942 | 0.693 | 0.919 |
| 2943 | 0.666 | 0.925 |
| 2944 | 0.661 | 0.927 |
| 2945 | 0.681 | 0.912 |
| 2946 | 0.662 | 0.916 |
| 2947 | 0.695 | 0.923 |
| 2948 | 0.676 | 0.926 |
| 2949 | 0.662 | 0.923 |
| 2950 | 0.643 | 0.942 |
| 2951 | 0.708 | 0.939 |
| 2952 | 0.626 | 0.919 |
| 2953 | 0.656 | 0.937 |
| 2954 | 0.691 | 0.923 |
| 2955 | 0.691 | 0.929 |
| 2956 | 0.744 | 0.921 |
| 2957 | 0.688 | 0.933 |
| 2958 | 0.686 | 0.921 |
| 2959 | 0.693 | 0.916 |
| 2960 | 0.666 | 0.934 |
| 2961 | 0.648 | 0.924 |
| 2962 | 0.678 | 0.935 |
| 2963 | 0.708 | 0.925 |
| 2964 | 0.687 | 0.932 |
| 2965 | 0.684 | 0.916 |
| 2966 | 0.737 | 0.927 |
| 2967 | 0.686 | 0.920 |
| 2968 | 0.648 | 0.922 |
| 2969 | 0.671 | 0.927 |
| 2970 | 0.625 | 0.924 |
| 2971 | 0.651 | 0.917 |
| 2972 | 0.648 | 0.921 |
| 2973 | 0.694 | 0.923 |

|      |       |       |
|------|-------|-------|
| 2974 | 0.670 | 0.934 |
| 2975 | 0.732 | 0.928 |
| 2976 | 0.684 | 0.924 |
| 2977 | 0.725 | 0.908 |
| 2978 | 0.690 | 0.918 |
| 2979 | 0.615 | 0.926 |
| 2980 | 0.670 | 0.934 |
| 2981 | 0.661 | 0.925 |
| 2982 | 0.691 | 0.910 |
| 2983 | 0.666 | 0.927 |
| 2984 | 0.635 | 0.925 |
| 2985 | 0.707 | 0.929 |
| 2986 | 0.712 | 0.934 |
| 2987 | 0.643 | 0.907 |
| 2988 | 0.695 | 0.921 |
| 2989 | 0.647 | 0.924 |
| 2990 | 0.661 | 0.920 |
| 2991 | 0.705 | 0.931 |
| 2992 | 0.677 | 0.934 |
| 2993 | 0.703 | 0.923 |
| 2994 | 0.681 | 0.923 |
| 2995 | 0.671 | 0.919 |
| 2996 | 0.645 | 0.921 |
| 2997 | 0.666 | 0.919 |
| 2998 | 0.626 | 0.923 |
| 2999 | 0.677 | 0.915 |
| 3000 | 0.658 | 0.924 |
| 3001 | 0.681 | 0.924 |
| 3002 | 0.663 | 0.924 |
| 3003 | 0.645 | 0.914 |
| 3004 | 0.666 | 0.917 |
| 3005 | 0.674 | 0.929 |
| 3006 | 0.673 | 0.920 |
| 3007 | 0.690 | 0.927 |
| 3008 | 0.681 | 0.917 |
| 3009 | 0.697 | 0.916 |
| 3010 | 0.651 | 0.919 |
| 3011 | 0.693 | 0.921 |
| 3012 | 0.679 | 0.919 |

|      |       |       |
|------|-------|-------|
| 3013 | 0.685 | 0.930 |
| 3014 | 0.678 | 0.924 |
| 3015 | 0.647 | 0.921 |
| 3016 | 0.665 | 0.935 |
| 3017 | 0.682 | 0.934 |
| 3018 | 0.633 | 0.924 |
| 3019 | 0.674 | 0.922 |
| 3020 | 0.655 | 0.938 |
| 3021 | 0.659 | 0.915 |
| 3022 | 0.662 | 0.923 |
| 3023 | 0.624 | 0.918 |
| 3024 | 0.670 | 0.934 |
| 3025 | 0.670 | 0.924 |
| 3026 | 0.689 | 0.929 |
| 3027 | 0.638 | 0.920 |
| 3028 | 0.639 | 0.931 |
| 3029 | 0.658 | 0.928 |
| 3030 | 0.667 | 0.922 |
| 3031 | 0.728 | 0.916 |
| 3032 | 0.686 | 0.921 |
| 3033 | 0.669 | 0.910 |
| 3034 | 0.655 | 0.925 |
| 3035 | 0.697 | 0.919 |
| 3036 | 0.653 | 0.922 |
| 3037 | 0.702 | 0.922 |
| 3038 | 0.666 | 0.918 |
| 3039 | 0.703 | 0.915 |
| 3040 | 0.658 | 0.926 |
| 3041 | 0.654 | 0.934 |
| 3042 | 0.691 | 0.918 |
| 3043 | 0.708 | 0.931 |
| 3044 | 0.652 | 0.930 |
| 3045 | 0.661 | 0.921 |
| 3046 | 0.663 | 0.927 |
| 3047 | 0.659 | 0.917 |
| 3048 | 0.682 | 0.925 |
| 3049 | 0.654 | 0.928 |
| 3050 | 0.664 | 0.927 |
| 3051 | 0.668 | 0.914 |



|      |       |       |
|------|-------|-------|
| 3052 | 0.695 | 0.917 |
| 3053 | 0.677 | 0.926 |
| 3054 | 0.635 | 0.927 |
| 3055 | 0.643 | 0.929 |
| 3056 | 0.663 | 0.923 |
| 3057 | 0.683 | 0.923 |
| 3058 | 0.697 | 0.918 |
| 3059 | 0.670 | 0.921 |
| 3060 | 0.643 | 0.919 |
| 3061 | 0.658 | 0.930 |
| 3062 | 0.630 | 0.935 |
| 3063 | 0.670 | 0.910 |
| 3064 | 0.713 | 0.915 |
| 3065 | 0.709 | 0.918 |
| 3066 | 0.687 | 0.918 |
| 3067 | 0.700 | 0.928 |
| 3068 | 0.702 | 0.920 |
| 3069 | 0.671 | 0.918 |
| 3070 | 0.642 | 0.919 |
| 3071 | 0.698 | 0.925 |
| 3072 | 0.702 | 0.919 |
| 3073 | 0.662 | 0.925 |
| 3074 | 0.643 | 0.922 |
| 3075 | 0.667 | 0.919 |
| 3076 | 0.674 | 0.923 |
| 3077 | 0.662 | 0.920 |
| 3078 | 0.676 | 0.908 |
| 3079 | 0.663 | 0.928 |
| 3080 | 0.666 | 0.920 |
| 3081 | 0.675 | 0.924 |
| 3082 | 0.689 | 0.909 |
| 3083 | 0.702 | 0.917 |
| 3084 | 0.690 | 0.919 |
| 3085 | 0.670 | 0.931 |
| 3086 | 0.655 | 0.926 |
| 3087 | 0.612 | 0.916 |
| 3088 | 0.667 | 0.918 |
| 3089 | 0.668 | 0.921 |
| 3090 | 0.645 | 0.915 |

|      |       |       |
|------|-------|-------|
| 3091 | 0.650 | 0.925 |
| 3092 | 0.693 | 0.923 |
| 3093 | 0.647 | 0.928 |
| 3094 | 0.652 | 0.930 |
| 3095 | 0.709 | 0.919 |
| 3096 | 0.664 | 0.923 |
| 3097 | 0.677 | 0.920 |
| 3098 | 0.693 | 0.927 |
| 3099 | 0.629 | 0.925 |
| 3100 | 0.662 | 0.926 |
| 3101 | 0.654 | 0.917 |
| 3102 | 0.664 | 0.928 |
| 3103 | 0.692 | 0.940 |
| 3104 | 0.668 | 0.924 |
| 3105 | 0.637 | 0.924 |
| 3106 | 0.655 | 0.913 |
| 3107 | 0.679 | 0.921 |
| 3108 | 0.673 | 0.927 |
| 3109 | 0.685 | 0.916 |
| 3110 | 0.698 | 0.923 |
| 3111 | 0.657 | 0.931 |
| 3112 | 0.694 | 0.925 |
| 3113 | 0.654 | 0.919 |
| 3114 | 0.664 | 0.920 |
| 3115 | 0.681 | 0.927 |
| 3116 | 0.663 | 0.920 |
| 3117 | 0.693 | 0.916 |
| 3118 | 0.685 | 0.928 |
| 3119 | 0.692 | 0.923 |
| 3120 | 0.639 | 0.924 |
| 3121 | 0.674 | 0.907 |
| 3122 | 0.661 | 0.931 |
| 3123 | 0.651 | 0.923 |
| 3124 | 0.705 | 0.927 |
| 3125 | 0.677 | 0.913 |
| 3126 | 0.725 | 0.926 |
| 3127 | 0.670 | 0.919 |
| 3128 | 0.678 | 0.932 |
| 3129 | 0.616 | 0.932 |

|      |       |       |
|------|-------|-------|
| 3130 | 0.699 | 0.926 |
| 3131 | 0.704 | 0.918 |
| 3132 | 0.672 | 0.921 |
| 3133 | 0.666 | 0.931 |
| 3134 | 0.716 | 0.917 |
| 3135 | 0.653 | 0.930 |
| 3136 | 0.656 | 0.925 |
| 3137 | 0.678 | 0.913 |
| 3138 | 0.620 | 0.913 |
| 3139 | 0.695 | 0.928 |
| 3140 | 0.677 | 0.921 |
| 3141 | 0.668 | 0.919 |
| 3142 | 0.694 | 0.920 |
| 3143 | 0.675 | 0.914 |
| 3144 | 0.662 | 0.927 |
| 3145 | 0.678 | 0.912 |
| 3146 | 0.658 | 0.921 |
| 3147 | 0.696 | 0.920 |
| 3148 | 0.690 | 0.919 |
| 3149 | 0.656 | 0.932 |
| 3150 | 0.656 | 0.922 |
| 3151 | 0.627 | 0.929 |
| 3152 | 0.689 | 0.928 |
| 3153 | 0.678 | 0.925 |
| 3154 | 0.685 | 0.921 |
| 3155 | 0.677 | 0.924 |
| 3156 | 0.695 | 0.929 |
| 3157 | 0.686 | 0.925 |
| 3158 | 0.617 | 0.928 |
| 3159 | 0.694 | 0.926 |
| 3160 | 0.670 | 0.915 |
| 3161 | 0.669 | 0.924 |
| 3162 | 0.696 | 0.930 |
| 3163 | 0.668 | 0.916 |
| 3164 | 0.716 | 0.930 |
| 3165 | 0.682 | 0.927 |
| 3166 | 0.659 | 0.926 |
| 3167 | 0.681 | 0.930 |
| 3168 | 0.708 | 0.921 |

|      |       |       |
|------|-------|-------|
| 3169 | 0.675 | 0.919 |
| 3170 | 0.673 | 0.922 |
| 3171 | 0.655 | 0.934 |
| 3172 | 0.629 | 0.925 |
| 3173 | 0.668 | 0.925 |
| 3174 | 0.681 | 0.919 |
| 3175 | 0.697 | 0.917 |
| 3176 | 0.729 | 0.921 |
| 3177 | 0.708 | 0.923 |
| 3178 | 0.653 | 0.915 |
| 3179 | 0.651 | 0.915 |
| 3180 | 0.692 | 0.922 |
| 3181 | 0.670 | 0.921 |
| 3182 | 0.678 | 0.926 |
| 3183 | 0.675 | 0.918 |
| 3184 | 0.669 | 0.920 |
| 3185 | 0.704 | 0.917 |
| 3186 | 0.673 | 0.927 |
| 3187 | 0.693 | 0.915 |
| 3188 | 0.689 | 0.934 |
| 3189 | 0.654 | 0.922 |
| 3190 | 0.640 | 0.905 |
| 3191 | 0.696 | 0.922 |
| 3192 | 0.701 | 0.926 |
| 3193 | 0.682 | 0.925 |
| 3194 | 0.701 | 0.911 |
| 3195 | 0.651 | 0.921 |
| 3196 | 0.693 | 0.927 |
| 3197 | 0.732 | 0.921 |
| 3198 | 0.655 | 0.932 |
| 3199 | 0.671 | 0.923 |
| 3200 | 0.678 | 0.923 |
| 3201 | 0.675 | 0.925 |
| 3202 | 0.675 | 0.912 |
| 3203 | 0.698 | 0.906 |
| 3204 | 0.683 | 0.931 |
| 3205 | 0.666 | 0.921 |
| 3206 | 0.687 | 0.922 |
| 3207 | 0.661 | 0.922 |

|      |       |       |
|------|-------|-------|
| 3208 | 0.705 | 0.924 |
| 3209 | 0.670 | 0.913 |
| 3210 | 0.644 | 0.920 |
| 3211 | 0.666 | 0.929 |
| 3212 | 0.682 | 0.923 |
| 3213 | 0.640 | 0.917 |
| 3214 | 0.675 | 0.908 |
| 3215 | 0.692 | 0.923 |
| 3216 | 0.670 | 0.921 |
| 3217 | 0.647 | 0.940 |
| 3218 | 0.712 | 0.918 |
| 3219 | 0.663 | 0.930 |
| 3220 | 0.656 | 0.920 |
| 3221 | 0.677 | 0.917 |
| 3222 | 0.694 | 0.921 |
| 3223 | 0.685 | 0.909 |
| 3224 | 0.671 | 0.919 |
| 3225 | 0.700 | 0.911 |
| 3226 | 0.678 | 0.905 |
| 3227 | 0.697 | 0.922 |
| 3228 | 0.689 | 0.923 |
| 3229 | 0.659 | 0.921 |
| 3230 | 0.679 | 0.916 |
| 3231 | 0.696 | 0.916 |
| 3232 | 0.712 | 0.921 |
| 3233 | 0.670 | 0.926 |
| 3234 | 0.691 | 0.916 |
| 3235 | 0.648 | 0.931 |
| 3236 | 0.660 | 0.920 |
| 3237 | 0.666 | 0.917 |
| 3238 | 0.700 | 0.913 |
| 3239 | 0.705 | 0.929 |
| 3240 | 0.681 | 0.908 |
| 3241 | 0.697 | 0.919 |
| 3242 | 0.666 | 0.920 |
| 3243 | 0.685 | 0.935 |
| 3244 | 0.658 | 0.930 |
| 3245 | 0.675 | 0.930 |
| 3246 | 0.658 | 0.914 |

|      |       |       |
|------|-------|-------|
| 3247 | 0.704 | 0.928 |
| 3248 | 0.660 | 0.938 |
| 3249 | 0.639 | 0.912 |
| 3250 | 0.646 | 0.920 |
| 3251 | 0.700 | 0.917 |
| 3252 | 0.697 | 0.916 |
| 3253 | 0.671 | 0.927 |
| 3254 | 0.622 | 0.925 |
| 3255 | 0.682 | 0.919 |
| 3256 | 0.651 | 0.913 |
| 3257 | 0.644 | 0.919 |
| 3258 | 0.690 | 0.917 |
| 3259 | 0.658 | 0.911 |
| 3260 | 0.616 | 0.921 |
| 3261 | 0.647 | 0.922 |
| 3262 | 0.705 | 0.916 |
| 3263 | 0.683 | 0.924 |
| 3264 | 0.686 | 0.922 |
| 3265 | 0.658 | 0.913 |
| 3266 | 0.704 | 0.932 |
| 3267 | 0.623 | 0.926 |
| 3268 | 0.636 | 0.928 |
| 3269 | 0.639 | 0.920 |
| 3270 | 0.708 | 0.916 |
| 3271 | 0.634 | 0.915 |
| 3272 | 0.689 | 0.929 |
| 3273 | 0.666 | 0.922 |
| 3274 | 0.671 | 0.940 |
| 3275 | 0.674 | 0.915 |
| 3276 | 0.681 | 0.909 |
| 3277 | 0.666 | 0.917 |
| 3278 | 0.691 | 0.931 |
| 3279 | 0.661 | 0.929 |
| 3280 | 0.649 | 0.934 |
| 3281 | 0.668 | 0.908 |
| 3282 | 0.692 | 0.900 |
| 3283 | 0.629 | 0.933 |
| 3284 | 0.728 | 0.927 |
| 3285 | 0.642 | 0.936 |

|      |       |       |
|------|-------|-------|
| 3286 | 0.679 | 0.921 |
| 3287 | 0.684 | 0.928 |
| 3288 | 0.635 | 0.925 |
| 3289 | 0.673 | 0.920 |
| 3290 | 0.700 | 0.914 |
| 3291 | 0.689 | 0.923 |
| 3292 | 0.684 | 0.921 |
| 3293 | 0.627 | 0.924 |
| 3294 | 0.698 | 0.924 |
| 3295 | 0.682 | 0.921 |
| 3296 | 0.689 | 0.934 |
| 3297 | 0.660 | 0.922 |
| 3298 | 0.616 | 0.923 |
| 3299 | 0.656 | 0.921 |
| 3300 | 0.644 | 0.926 |
| 3301 | 0.667 | 0.922 |
| 3302 | 0.701 | 0.915 |
| 3303 | 0.681 | 0.922 |
| 3304 | 0.685 | 0.930 |
| 3305 | 0.692 | 0.915 |
| 3306 | 0.692 | 0.929 |
| 3307 | 0.658 | 0.920 |
| 3308 | 0.623 | 0.930 |
| 3309 | 0.682 | 0.926 |
| 3310 | 0.659 | 0.927 |
| 3311 | 0.701 | 0.919 |
| 3312 | 0.669 | 0.920 |
| 3313 | 0.673 | 0.924 |
| 3314 | 0.660 | 0.915 |
| 3315 | 0.670 | 0.923 |
| 3316 | 0.679 | 0.926 |
| 3317 | 0.690 | 0.921 |
| 3318 | 0.680 | 0.923 |
| 3319 | 0.700 | 0.914 |
| 3320 | 0.677 | 0.902 |
| 3321 | 0.702 | 0.918 |
| 3322 | 0.644 | 0.922 |
| 3323 | 0.633 | 0.922 |
| 3324 | 0.654 | 0.920 |

|      |       |       |
|------|-------|-------|
| 3325 | 0.689 | 0.915 |
| 3326 | 0.707 | 0.919 |
| 3327 | 0.690 | 0.918 |
| 3328 | 0.683 | 0.915 |
| 3329 | 0.621 | 0.923 |
| 3330 | 0.647 | 0.927 |
| 3331 | 0.676 | 0.916 |
| 3332 | 0.665 | 0.921 |
| 3333 | 0.719 | 0.916 |
| 3334 | 0.677 | 0.914 |
| 3335 | 0.650 | 0.924 |
| 3336 | 0.707 | 0.924 |
| 3337 | 0.676 | 0.916 |
| 3338 | 0.649 | 0.905 |
| 3339 | 0.651 | 0.920 |
| 3340 | 0.649 | 0.931 |
| 3341 | 0.658 | 0.916 |
| 3342 | 0.660 | 0.927 |
| 3343 | 0.660 | 0.914 |
| 3344 | 0.658 | 0.910 |
| 3345 | 0.702 | 0.917 |
| 3346 | 0.656 | 0.917 |
| 3347 | 0.654 | 0.928 |
| 3348 | 0.705 | 0.926 |
| 3349 | 0.746 | 0.927 |
| 3350 | 0.670 | 0.933 |
| 3351 | 0.702 | 0.923 |
| 3352 | 0.636 | 0.909 |
| 3353 | 0.654 | 0.913 |
| 3354 | 0.683 | 0.920 |
| 3355 | 0.687 | 0.908 |
| 3356 | 0.651 | 0.931 |
| 3357 | 0.664 | 0.920 |
| 3358 | 0.674 | 0.931 |
| 3359 | 0.669 | 0.908 |
| 3360 | 0.704 | 0.915 |
| 3361 | 0.690 | 0.915 |
| 3362 | 0.669 | 0.929 |
| 3363 | 0.660 | 0.921 |



|      |       |       |
|------|-------|-------|
| 3364 | 0.649 | 0.918 |
| 3365 | 0.672 | 0.924 |
| 3366 | 0.663 | 0.920 |
| 3367 | 0.688 | 0.921 |
| 3368 | 0.682 | 0.925 |
| 3369 | 0.606 | 0.914 |
| 3370 | 0.660 | 0.914 |
| 3371 | 0.651 | 0.930 |
| 3372 | 0.666 | 0.915 |
| 3373 | 0.667 | 0.917 |
| 3374 | 0.666 | 0.931 |
| 3375 | 0.674 | 0.927 |
| 3376 | 0.657 | 0.921 |
| 3377 | 0.635 | 0.925 |
| 3378 | 0.661 | 0.924 |
| 3379 | 0.693 | 0.922 |
| 3380 | 0.700 | 0.922 |
| 3381 | 0.690 | 0.925 |
| 3382 | 0.678 | 0.922 |
| 3383 | 0.680 | 0.935 |
| 3384 | 0.661 | 0.914 |
| 3385 | 0.701 | 0.926 |
| 3386 | 0.644 | 0.917 |
| 3387 | 0.641 | 0.927 |
| 3388 | 0.667 | 0.919 |
| 3389 | 0.665 | 0.920 |
| 3390 | 0.643 | 0.925 |
| 3391 | 0.646 | 0.919 |
| 3392 | 0.654 | 0.915 |
| 3393 | 0.703 | 0.922 |
| 3394 | 0.673 | 0.929 |
| 3395 | 0.708 | 0.914 |
| 3396 | 0.681 | 0.930 |
| 3397 | 0.625 | 0.935 |
| 3398 | 0.701 | 0.919 |
| 3399 | 0.659 | 0.916 |
| 3400 | 0.681 | 0.936 |
| 3401 | 0.673 | 0.913 |
| 3402 | 0.678 | 0.927 |

|      |       |       |
|------|-------|-------|
| 3403 | 0.675 | 0.919 |
| 3404 | 0.678 | 0.916 |
| 3405 | 0.659 | 0.921 |
| 3406 | 0.710 | 0.927 |
| 3407 | 0.679 | 0.930 |
| 3408 | 0.693 | 0.919 |
| 3409 | 0.660 | 0.920 |
| 3410 | 0.683 | 0.921 |
| 3411 | 0.659 | 0.917 |
| 3412 | 0.638 | 0.920 |
| 3413 | 0.700 | 0.904 |
| 3414 | 0.690 | 0.926 |
| 3415 | 0.645 | 0.914 |
| 3416 | 0.687 | 0.921 |
| 3417 | 0.662 | 0.923 |
| 3418 | 0.695 | 0.915 |
| 3419 | 0.653 | 0.911 |
| 3420 | 0.696 | 0.917 |
| 3421 | 0.666 | 0.933 |
| 3422 | 0.660 | 0.922 |
| 3423 | 0.679 | 0.930 |
| 3424 | 0.680 | 0.920 |
| 3425 | 0.658 | 0.918 |
| 3426 | 0.644 | 0.913 |
| 3427 | 0.630 | 0.914 |
| 3428 | 0.679 | 0.940 |
| 3429 | 0.689 | 0.915 |
| 3430 | 0.670 | 0.914 |
| 3431 | 0.669 | 0.915 |
| 3432 | 0.692 | 0.926 |
| 3433 | 0.662 | 0.917 |
| 3434 | 0.616 | 0.916 |
| 3435 | 0.670 | 0.915 |
| 3436 | 0.663 | 0.930 |
| 3437 | 0.654 | 0.924 |
| 3438 | 0.672 | 0.927 |
| 3439 | 0.654 | 0.942 |
| 3440 | 0.655 | 0.934 |
| 3441 | 0.677 | 0.921 |

|      |       |       |
|------|-------|-------|
| 3442 | 0.694 | 0.923 |
| 3443 | 0.698 | 0.916 |
| 3444 | 0.666 | 0.924 |
| 3445 | 0.653 | 0.925 |
| 3446 | 0.634 | 0.917 |
| 3447 | 0.677 | 0.913 |
| 3448 | 0.632 | 0.923 |
| 3449 | 0.653 | 0.929 |
| 3450 | 0.663 | 0.917 |
| 3451 | 0.671 | 0.906 |
| 3452 | 0.703 | 0.909 |
| 3453 | 0.685 | 0.922 |
| 3454 | 0.652 | 0.938 |
| 3455 | 0.632 | 0.909 |
| 3456 | 0.659 | 0.931 |
| 3457 | 0.693 | 0.922 |
| 3458 | 0.694 | 0.923 |
| 3459 | 0.697 | 0.925 |
| 3460 | 0.657 | 0.929 |
| 3461 | 0.648 | 0.926 |
| 3462 | 0.724 | 0.928 |
| 3463 | 0.690 | 0.931 |
| 3464 | 0.655 | 0.925 |
| 3465 | 0.643 | 0.921 |
| 3466 | 0.692 | 0.914 |
| 3467 | 0.683 | 0.915 |
| 3468 | 0.670 | 0.922 |
| 3469 | 0.652 | 0.920 |
| 3470 | 0.679 | 0.927 |
| 3471 | 0.732 | 0.928 |
| 3472 | 0.669 | 0.924 |
| 3473 | 0.649 | 0.913 |
| 3474 | 0.673 | 0.914 |
| 3475 | 0.662 | 0.921 |
| 3476 | 0.693 | 0.919 |
| 3477 | 0.677 | 0.931 |
| 3478 | 0.712 | 0.926 |
| 3479 | 0.666 | 0.905 |
| 3480 | 0.704 | 0.935 |

|      |       |       |
|------|-------|-------|
| 3481 | 0.662 | 0.924 |
| 3482 | 0.653 | 0.919 |
| 3483 | 0.689 | 0.924 |
| 3484 | 0.675 | 0.928 |
| 3485 | 0.670 | 0.912 |
| 3486 | 0.680 | 0.923 |
| 3487 | 0.690 | 0.926 |
| 3488 | 0.666 | 0.918 |
| 3489 | 0.676 | 0.914 |
| 3490 | 0.701 | 0.925 |
| 3491 | 0.708 | 0.926 |
| 3492 | 0.697 | 0.925 |
| 3493 | 0.647 | 0.923 |
| 3494 | 0.675 | 0.932 |
| 3495 | 0.666 | 0.912 |
| 3496 | 0.670 | 0.923 |
| 3497 | 0.673 | 0.918 |
| 3498 | 0.635 | 0.916 |
| 3499 | 0.606 | 0.922 |
| 3500 | 0.681 | 0.918 |
| 3501 | 0.648 | 0.916 |
| 3502 | 0.649 | 0.925 |
| 3503 | 0.674 | 0.903 |
| 3504 | 0.675 | 0.918 |
| 3505 | 0.700 | 0.918 |
| 3506 | 0.636 | 0.912 |
| 3507 | 0.700 | 0.925 |
| 3508 | 0.622 | 0.928 |
| 3509 | 0.637 | 0.920 |
| 3510 | 0.674 | 0.903 |
| 3511 | 0.661 | 0.914 |
| 3512 | 0.690 | 0.915 |
| 3513 | 0.646 | 0.920 |
| 3514 | 0.646 | 0.923 |
| 3515 | 0.693 | 0.916 |
| 3516 | 0.685 | 0.925 |
| 3517 | 0.686 | 0.927 |
| 3518 | 0.658 | 0.907 |
| 3519 | 0.629 | 0.925 |

|      |       |       |
|------|-------|-------|
| 3520 | 0.691 | 0.912 |
| 3521 | 0.637 | 0.926 |
| 3522 | 0.666 | 0.918 |
| 3523 | 0.624 | 0.915 |
| 3524 | 0.669 | 0.924 |
| 3525 | 0.675 | 0.920 |
| 3526 | 0.670 | 0.928 |
| 3527 | 0.661 | 0.925 |
| 3528 | 0.647 | 0.911 |
| 3529 | 0.674 | 0.922 |
| 3530 | 0.698 | 0.926 |
| 3531 | 0.690 | 0.927 |
| 3532 | 0.626 | 0.928 |
| 3533 | 0.591 | 0.916 |
| 3534 | 0.648 | 0.913 |
| 3535 | 0.682 | 0.921 |
| 3536 | 0.676 | 0.916 |
| 3537 | 0.693 | 0.914 |
| 3538 | 0.717 | 0.924 |
| 3539 | 0.702 | 0.918 |
| 3540 | 0.676 | 0.926 |
| 3541 | 0.681 | 0.935 |
| 3542 | 0.677 | 0.915 |
| 3543 | 0.663 | 0.903 |
| 3544 | 0.667 | 0.919 |
| 3545 | 0.679 | 0.914 |
| 3546 | 0.694 | 0.927 |
| 3547 | 0.697 | 0.932 |
| 3548 | 0.642 | 0.921 |
| 3549 | 0.661 | 0.919 |
| 3550 | 0.708 | 0.900 |
| 3551 | 0.701 | 0.922 |
| 3552 | 0.665 | 0.922 |
| 3553 | 0.706 | 0.916 |
| 3554 | 0.635 | 0.909 |
| 3555 | 0.707 | 0.915 |
| 3556 | 0.711 | 0.916 |
| 3557 | 0.684 | 0.920 |
| 3558 | 0.653 | 0.913 |

|      |       |       |
|------|-------|-------|
| 3559 | 0.668 | 0.921 |
| 3560 | 0.691 | 0.915 |
| 3561 | 0.662 | 0.917 |
| 3562 | 0.702 | 0.914 |
| 3563 | 0.659 | 0.918 |
| 3564 | 0.702 | 0.932 |
| 3565 | 0.685 | 0.908 |
| 3566 | 0.666 | 0.920 |
| 3567 | 0.637 | 0.918 |
| 3568 | 0.682 | 0.913 |
| 3569 | 0.692 | 0.929 |
| 3570 | 0.672 | 0.930 |
| 3571 | 0.633 | 0.927 |
| 3572 | 0.657 | 0.922 |
| 3573 | 0.656 | 0.918 |
| 3574 | 0.659 | 0.914 |
| 3575 | 0.652 | 0.925 |
| 3576 | 0.669 | 0.924 |
| 3577 | 0.643 | 0.917 |
| 3578 | 0.680 | 0.922 |
| 3579 | 0.674 | 0.920 |
| 3580 | 0.705 | 0.913 |
| 3581 | 0.688 | 0.922 |
| 3582 | 0.642 | 0.931 |
| 3583 | 0.658 | 0.918 |
| 3584 | 0.698 | 0.906 |
| 3585 | 0.645 | 0.912 |
| 3586 | 0.646 | 0.924 |
| 3587 | 0.650 | 0.912 |
| 3588 | 0.650 | 0.926 |
| 3589 | 0.662 | 0.926 |
| 3590 | 0.660 | 0.923 |
| 3591 | 0.698 | 0.924 |
| 3592 | 0.664 | 0.923 |
| 3593 | 0.690 | 0.926 |
| 3594 | 0.652 | 0.923 |
| 3595 | 0.679 | 0.924 |
| 3596 | 0.638 | 0.921 |
| 3597 | 0.713 | 0.920 |

|      |       |       |
|------|-------|-------|
| 3598 | 0.643 | 0.921 |
| 3599 | 0.679 | 0.922 |
| 3600 | 0.685 | 0.918 |
| 3601 | 0.662 | 0.929 |
| 3602 | 0.705 | 0.922 |
| 3603 | 0.662 | 0.919 |
| 3604 | 0.651 | 0.923 |
| 3605 | 0.704 | 0.915 |
| 3606 | 0.673 | 0.921 |
| 3607 | 0.635 | 0.920 |
| 3608 | 0.639 | 0.926 |
| 3609 | 0.684 | 0.911 |
| 3610 | 0.653 | 0.917 |
| 3611 | 0.658 | 0.917 |
| 3612 | 0.640 | 0.911 |
| 3613 | 0.674 | 0.919 |
| 3614 | 0.705 | 0.916 |
| 3615 | 0.693 | 0.918 |
| 3616 | 0.682 | 0.910 |
| 3617 | 0.740 | 0.926 |
| 3618 | 0.642 | 0.920 |
| 3619 | 0.642 | 0.915 |
| 3620 | 0.699 | 0.915 |
| 3621 | 0.695 | 0.923 |
| 3622 | 0.675 | 0.927 |
| 3623 | 0.671 | 0.924 |
| 3624 | 0.639 | 0.915 |
| 3625 | 0.668 | 0.921 |
| 3626 | 0.683 | 0.925 |
| 3627 | 0.636 | 0.907 |
| 3628 | 0.640 | 0.926 |
| 3629 | 0.693 | 0.915 |
| 3630 | 0.663 | 0.932 |
| 3631 | 0.658 | 0.915 |
| 3632 | 0.663 | 0.912 |
| 3633 | 0.644 | 0.921 |
| 3634 | 0.652 | 0.926 |
| 3635 | 0.659 | 0.920 |
| 3636 | 0.693 | 0.927 |

|      |       |       |
|------|-------|-------|
| 3637 | 0.677 | 0.919 |
| 3638 | 0.666 | 0.922 |
| 3639 | 0.664 | 0.916 |
| 3640 | 0.662 | 0.915 |
| 3641 | 0.715 | 0.923 |
| 3642 | 0.663 | 0.911 |
| 3643 | 0.666 | 0.932 |
| 3644 | 0.667 | 0.912 |
| 3645 | 0.656 | 0.923 |
| 3646 | 0.645 | 0.920 |
| 3647 | 0.665 | 0.920 |
| 3648 | 0.663 | 0.924 |
| 3649 | 0.667 | 0.926 |
| 3650 | 0.681 | 0.934 |
| 3651 | 0.690 | 0.915 |
| 3652 | 0.666 | 0.925 |
| 3653 | 0.673 | 0.924 |
| 3654 | 0.698 | 0.906 |
| 3655 | 0.681 | 0.921 |
| 3656 | 0.655 | 0.917 |
| 3657 | 0.692 | 0.916 |
| 3658 | 0.649 | 0.918 |
| 3659 | 0.670 | 0.912 |
| 3660 | 0.688 | 0.924 |
| 3661 | 0.673 | 0.930 |
| 3662 | 0.658 | 0.926 |
| 3663 | 0.677 | 0.918 |
| 3664 | 0.663 | 0.902 |
| 3665 | 0.669 | 0.927 |
| 3666 | 0.665 | 0.914 |
| 3667 | 0.658 | 0.915 |
| 3668 | 0.655 | 0.919 |
| 3669 | 0.685 | 0.916 |
| 3670 | 0.650 | 0.933 |
| 3671 | 0.678 | 0.926 |
| 3672 | 0.672 | 0.918 |
| 3673 | 0.672 | 0.929 |
| 3674 | 0.639 | 0.914 |
| 3675 | 0.679 | 0.908 |



|      |       |       |
|------|-------|-------|
| 3676 | 0.675 | 0.926 |
| 3677 | 0.681 | 0.918 |
| 3678 | 0.673 | 0.928 |
| 3679 | 0.701 | 0.919 |
| 3680 | 0.658 | 0.935 |
| 3681 | 0.624 | 0.912 |
| 3682 | 0.695 | 0.927 |
| 3683 | 0.693 | 0.921 |
| 3684 | 0.702 | 0.905 |
| 3685 | 0.644 | 0.911 |
| 3686 | 0.694 | 0.910 |
| 3687 | 0.670 | 0.928 |
| 3688 | 0.671 | 0.914 |
| 3689 | 0.647 | 0.926 |
| 3690 | 0.643 | 0.930 |
| 3691 | 0.658 | 0.921 |
| 3692 | 0.672 | 0.912 |
| 3693 | 0.677 | 0.920 |
| 3694 | 0.712 | 0.920 |
| 3695 | 0.681 | 0.923 |
| 3696 | 0.687 | 0.924 |
| 3697 | 0.678 | 0.929 |
| 3698 | 0.662 | 0.923 |
| 3699 | 0.705 | 0.927 |
| 3700 | 0.650 | 0.934 |
| 3701 | 0.644 | 0.918 |
| 3702 | 0.704 | 0.928 |
| 3703 | 0.683 | 0.908 |
| 3704 | 0.710 | 0.911 |
| 3705 | 0.695 | 0.913 |
| 3706 | 0.638 | 0.914 |
| 3707 | 0.654 | 0.927 |
| 3708 | 0.651 | 0.915 |
| 3709 | 0.654 | 0.925 |
| 3710 | 0.694 | 0.923 |
| 3711 | 0.666 | 0.907 |
| 3712 | 0.647 | 0.919 |
| 3713 | 0.704 | 0.911 |
| 3714 | 0.648 | 0.923 |

|      |       |       |
|------|-------|-------|
| 3715 | 0.729 | 0.926 |
| 3716 | 0.702 | 0.911 |
| 3717 | 0.671 | 0.919 |
| 3718 | 0.693 | 0.914 |
| 3719 | 0.692 | 0.927 |
| 3720 | 0.665 | 0.920 |
| 3721 | 0.631 | 0.922 |
| 3722 | 0.677 | 0.917 |
| 3723 | 0.679 | 0.915 |
| 3724 | 0.665 | 0.903 |
| 3725 | 0.665 | 0.918 |
| 3726 | 0.644 | 0.921 |
| 3727 | 0.664 | 0.926 |
| 3728 | 0.625 | 0.924 |
| 3729 | 0.656 | 0.916 |
| 3730 | 0.655 | 0.923 |
| 3731 | 0.669 | 0.914 |
| 3732 | 0.653 | 0.915 |
| 3733 | 0.712 | 0.911 |
| 3734 | 0.675 | 0.923 |
| 3735 | 0.678 | 0.910 |
| 3736 | 0.674 | 0.921 |
| 3737 | 0.701 | 0.901 |
| 3738 | 0.656 | 0.925 |
| 3739 | 0.685 | 0.925 |
| 3740 | 0.618 | 0.925 |
| 3741 | 0.670 | 0.924 |
| 3742 | 0.692 | 0.910 |
| 3743 | 0.659 | 0.918 |
| 3744 | 0.701 | 0.916 |
| 3745 | 0.693 | 0.920 |
| 3746 | 0.694 | 0.912 |
| 3747 | 0.679 | 0.917 |
| 3748 | 0.641 | 0.914 |
| 3749 | 0.698 | 0.920 |
| 3750 | 0.656 | 0.922 |
| 3751 | 0.669 | 0.917 |
| 3752 | 0.643 | 0.932 |
| 3753 | 0.626 | 0.929 |

|      |       |       |
|------|-------|-------|
| 3754 | 0.653 | 0.921 |
| 3755 | 0.651 | 0.922 |
| 3756 | 0.665 | 0.926 |
| 3757 | 0.670 | 0.912 |
| 3758 | 0.675 | 0.914 |
| 3759 | 0.633 | 0.917 |
| 3760 | 0.698 | 0.923 |
| 3761 | 0.643 | 0.913 |
| 3762 | 0.702 | 0.909 |
| 3763 | 0.656 | 0.918 |
| 3764 | 0.652 | 0.925 |
| 3765 | 0.674 | 0.918 |
| 3766 | 0.670 | 0.920 |
| 3767 | 0.658 | 0.922 |
| 3768 | 0.656 | 0.906 |
| 3769 | 0.623 | 0.928 |
| 3770 | 0.678 | 0.922 |
| 3771 | 0.662 | 0.915 |
| 3772 | 0.647 | 0.926 |
| 3773 | 0.671 | 0.917 |
| 3774 | 0.689 | 0.915 |
| 3775 | 0.668 | 0.914 |
| 3776 | 0.655 | 0.930 |
| 3777 | 0.645 | 0.905 |
| 3778 | 0.670 | 0.931 |
| 3779 | 0.629 | 0.933 |
| 3780 | 0.689 | 0.932 |
| 3781 | 0.630 | 0.917 |
| 3782 | 0.677 | 0.924 |
| 3783 | 0.676 | 0.925 |
| 3784 | 0.656 | 0.922 |
| 3785 | 0.693 | 0.929 |
| 3786 | 0.681 | 0.929 |
| 3787 | 0.694 | 0.931 |
| 3788 | 0.666 | 0.928 |
| 3789 | 0.647 | 0.919 |
| 3790 | 0.658 | 0.924 |
| 3791 | 0.635 | 0.918 |
| 3792 | 0.679 | 0.922 |

|      |       |       |
|------|-------|-------|
| 3793 | 0.644 | 0.916 |
| 3794 | 0.711 | 0.924 |
| 3795 | 0.646 | 0.917 |
| 3796 | 0.681 | 0.917 |
| 3797 | 0.630 | 0.915 |
| 3798 | 0.667 | 0.916 |
| 3799 | 0.643 | 0.922 |
| 3800 | 0.690 | 0.923 |
| 3801 | 0.639 | 0.922 |
| 3802 | 0.688 | 0.928 |
| 3803 | 0.675 | 0.925 |
| 3804 | 0.688 | 0.928 |
| 3805 | 0.631 | 0.929 |
| 3806 | 0.677 | 0.921 |
| 3807 | 0.690 | 0.918 |
| 3808 | 0.661 | 0.931 |
| 3809 | 0.639 | 0.920 |
| 3810 | 0.639 | 0.915 |
| 3811 | 0.660 | 0.924 |
| 3812 | 0.647 | 0.929 |
| 3813 | 0.689 | 0.931 |
| 3814 | 0.671 | 0.918 |
| 3815 | 0.674 | 0.921 |
| 3816 | 0.654 | 0.912 |
| 3817 | 0.655 | 0.912 |
| 3818 | 0.702 | 0.910 |
| 3819 | 0.592 | 0.918 |
| 3820 | 0.643 | 0.917 |
| 3821 | 0.629 | 0.910 |
| 3822 | 0.656 | 0.917 |
| 3823 | 0.723 | 0.917 |
| 3824 | 0.672 | 0.920 |
| 3825 | 0.693 | 0.926 |
| 3826 | 0.641 | 0.921 |
| 3827 | 0.654 | 0.915 |
| 3828 | 0.650 | 0.912 |
| 3829 | 0.702 | 0.933 |
| 3830 | 0.659 | 0.910 |
| 3831 | 0.627 | 0.927 |

|      |       |       |
|------|-------|-------|
| 3832 | 0.674 | 0.913 |
| 3833 | 0.671 | 0.915 |
| 3834 | 0.705 | 0.928 |
| 3835 | 0.683 | 0.918 |
| 3836 | 0.687 | 0.924 |
| 3837 | 0.643 | 0.922 |
| 3838 | 0.685 | 0.907 |
| 3839 | 0.647 | 0.908 |
| 3840 | 0.669 | 0.920 |
| 3841 | 0.651 | 0.920 |
| 3842 | 0.674 | 0.913 |
| 3843 | 0.667 | 0.921 |
| 3844 | 0.705 | 0.893 |
| 3845 | 0.697 | 0.907 |
| 3846 | 0.695 | 0.906 |
| 3847 | 0.654 | 0.924 |
| 3848 | 0.667 | 0.915 |
| 3849 | 0.684 | 0.921 |
| 3850 | 0.609 | 0.907 |
| 3851 | 0.631 | 0.920 |
| 3852 | 0.655 | 0.920 |
| 3853 | 0.658 | 0.922 |
| 3854 | 0.681 | 0.920 |
| 3855 | 0.670 | 0.935 |
| 3856 | 0.680 | 0.920 |
| 3857 | 0.677 | 0.925 |
| 3858 | 0.663 | 0.923 |
| 3859 | 0.648 | 0.918 |
| 3860 | 0.655 | 0.925 |
| 3861 | 0.608 | 0.928 |
| 3862 | 0.682 | 0.914 |
| 3863 | 0.666 | 0.922 |
| 3864 | 0.639 | 0.914 |
| 3865 | 0.615 | 0.922 |
| 3866 | 0.691 | 0.910 |
| 3867 | 0.693 | 0.930 |
| 3868 | 0.626 | 0.914 |
| 3869 | 0.650 | 0.915 |
| 3870 | 0.685 | 0.919 |

|      |       |       |
|------|-------|-------|
| 3871 | 0.681 | 0.923 |
| 3872 | 0.662 | 0.917 |
| 3873 | 0.646 | 0.925 |
| 3874 | 0.635 | 0.913 |
| 3875 | 0.647 | 0.929 |
| 3876 | 0.671 | 0.932 |
| 3877 | 0.662 | 0.917 |
| 3878 | 0.653 | 0.928 |
| 3879 | 0.647 | 0.920 |
| 3880 | 0.622 | 0.934 |
| 3881 | 0.630 | 0.920 |
| 3882 | 0.678 | 0.908 |
| 3883 | 0.629 | 0.914 |
| 3884 | 0.658 | 0.920 |
| 3885 | 0.710 | 0.903 |
| 3886 | 0.652 | 0.916 |
| 3887 | 0.659 | 0.917 |
| 3888 | 0.652 | 0.922 |
| 3889 | 0.652 | 0.922 |
| 3890 | 0.678 | 0.916 |
| 3891 | 0.697 | 0.909 |
| 3892 | 0.678 | 0.900 |
| 3893 | 0.660 | 0.933 |
| 3894 | 0.647 | 0.921 |
| 3895 | 0.695 | 0.911 |
| 3896 | 0.683 | 0.912 |
| 3897 | 0.697 | 0.921 |
| 3898 | 0.669 | 0.918 |
| 3899 | 0.620 | 0.909 |
| 3900 | 0.631 | 0.918 |
| 3901 | 0.687 | 0.924 |
| 3902 | 0.648 | 0.919 |
| 3903 | 0.643 | 0.922 |
| 3904 | 0.702 | 0.915 |
| 3905 | 0.685 | 0.907 |
| 3906 | 0.667 | 0.928 |
| 3907 | 0.716 | 0.911 |
| 3908 | 0.671 | 0.911 |
| 3909 | 0.679 | 0.910 |

|      |       |       |
|------|-------|-------|
| 3910 | 0.666 | 0.923 |
| 3911 | 0.643 | 0.925 |
| 3912 | 0.647 | 0.921 |
| 3913 | 0.678 | 0.919 |
| 3914 | 0.650 | 0.924 |
| 3915 | 0.640 | 0.921 |
| 3916 | 0.681 | 0.918 |
| 3917 | 0.670 | 0.923 |
| 3918 | 0.648 | 0.919 |
| 3919 | 0.674 | 0.913 |
| 3920 | 0.684 | 0.902 |
| 3921 | 0.635 | 0.916 |
| 3922 | 0.648 | 0.920 |
| 3923 | 0.662 | 0.920 |
| 3924 | 0.689 | 0.929 |
| 3925 | 0.674 | 0.929 |
| 3926 | 0.689 | 0.920 |
| 3927 | 0.689 | 0.922 |
| 3928 | 0.679 | 0.916 |
| 3929 | 0.659 | 0.918 |
| 3930 | 0.667 | 0.901 |
| 3931 | 0.697 | 0.915 |
| 3932 | 0.677 | 0.923 |
| 3933 | 0.692 | 0.922 |
| 3934 | 0.630 | 0.924 |
| 3935 | 0.667 | 0.921 |
| 3936 | 0.678 | 0.920 |
| 3937 | 0.708 | 0.920 |
| 3938 | 0.641 | 0.919 |
| 3939 | 0.660 | 0.928 |
| 3940 | 0.629 | 0.916 |
| 3941 | 0.645 | 0.915 |
| 3942 | 0.669 | 0.921 |
| 3943 | 0.682 | 0.920 |
| 3944 | 0.690 | 0.915 |
| 3945 | 0.678 | 0.925 |
| 3946 | 0.630 | 0.921 |
| 3947 | 0.647 | 0.928 |
| 3948 | 0.677 | 0.935 |

|      |       |       |
|------|-------|-------|
| 3949 | 0.634 | 0.929 |
| 3950 | 0.642 | 0.925 |
| 3951 | 0.662 | 0.916 |
| 3952 | 0.641 | 0.920 |
| 3953 | 0.681 | 0.928 |
| 3954 | 0.682 | 0.920 |
| 3955 | 0.620 | 0.911 |
| 3956 | 0.648 | 0.916 |
| 3957 | 0.662 | 0.922 |
| 3958 | 0.694 | 0.919 |
| 3959 | 0.652 | 0.911 |
| 3960 | 0.671 | 0.910 |
| 3961 | 0.635 | 0.903 |
| 3962 | 0.678 | 0.918 |
| 3963 | 0.656 | 0.915 |
| 3964 | 0.646 | 0.916 |
| 3965 | 0.655 | 0.921 |
| 3966 | 0.678 | 0.916 |
| 3967 | 0.631 | 0.916 |
| 3968 | 0.694 | 0.916 |
| 3969 | 0.687 | 0.928 |
| 3970 | 0.647 | 0.939 |
| 3971 | 0.675 | 0.918 |
| 3972 | 0.714 | 0.904 |
| 3973 | 0.693 | 0.914 |
| 3974 | 0.622 | 0.911 |
| 3975 | 0.672 | 0.922 |
| 3976 | 0.681 | 0.920 |
| 3977 | 0.666 | 0.914 |
| 3978 | 0.678 | 0.918 |
| 3979 | 0.638 | 0.910 |
| 3980 | 0.686 | 0.921 |
| 3981 | 0.676 | 0.925 |
| 3982 | 0.648 | 0.903 |
| 3983 | 0.718 | 0.919 |
| 3984 | 0.685 | 0.927 |
| 3985 | 0.684 | 0.926 |
| 3986 | 0.646 | 0.912 |
| 3987 | 0.666 | 0.926 |



|      |       |       |
|------|-------|-------|
| 3988 | 0.659 | 0.927 |
| 3989 | 0.676 | 0.916 |
| 3990 | 0.665 | 0.925 |
| 3991 | 0.679 | 0.916 |
| 3992 | 0.691 | 0.917 |
| 3993 | 0.675 | 0.921 |
| 3994 | 0.659 | 0.925 |
| 3995 | 0.696 | 0.920 |
| 3996 | 0.643 | 0.921 |
| 3997 | 0.658 | 0.922 |
| 3998 | 0.640 | 0.917 |
| 3999 | 0.683 | 0.920 |
| 4000 | 0.640 | 0.917 |
| 4001 | 0.607 | 0.908 |
| 4002 | 0.640 | 0.913 |
| 4003 | 0.697 | 0.929 |
| 4004 | 0.724 | 0.925 |
| 4005 | 0.685 | 0.909 |
| 4006 | 0.713 | 0.908 |
| 4007 | 0.652 | 0.920 |
| 4008 | 0.662 | 0.928 |
| 4009 | 0.642 | 0.905 |
| 4010 | 0.678 | 0.928 |
| 4011 | 0.693 | 0.923 |
| 4012 | 0.663 | 0.910 |
| 4013 | 0.687 | 0.914 |
| 4014 | 0.687 | 0.914 |
| 4015 | 0.614 | 0.917 |
| 4016 | 0.652 | 0.914 |
| 4017 | 0.678 | 0.918 |
| 4018 | 0.676 | 0.915 |
| 4019 | 0.654 | 0.914 |
| 4020 | 0.661 | 0.926 |
| 4021 | 0.683 | 0.910 |
| 4022 | 0.670 | 0.919 |
| 4023 | 0.659 | 0.921 |
| 4024 | 0.675 | 0.930 |
| 4025 | 0.648 | 0.921 |
| 4026 | 0.677 | 0.912 |

|      |       |       |
|------|-------|-------|
| 4027 | 0.690 | 0.909 |
| 4028 | 0.603 | 0.913 |
| 4029 | 0.681 | 0.918 |
| 4030 | 0.664 | 0.921 |
| 4031 | 0.705 | 0.917 |
| 4032 | 0.689 | 0.921 |
| 4033 | 0.689 | 0.920 |
| 4034 | 0.667 | 0.921 |
| 4035 | 0.663 | 0.927 |
| 4036 | 0.673 | 0.919 |
| 4037 | 0.682 | 0.918 |
| 4038 | 0.707 | 0.918 |
| 4039 | 0.672 | 0.905 |
| 4040 | 0.663 | 0.913 |
| 4041 | 0.656 | 0.914 |
| 4042 | 0.654 | 0.916 |
| 4043 | 0.675 | 0.916 |
| 4044 | 0.662 | 0.913 |
| 4045 | 0.668 | 0.930 |
| 4046 | 0.686 | 0.914 |
| 4047 | 0.626 | 0.911 |
| 4048 | 0.652 | 0.921 |
| 4049 | 0.667 | 0.914 |
| 4050 | 0.689 | 0.926 |
| 4051 | 0.689 | 0.917 |
| 4052 | 0.643 | 0.933 |
| 4053 | 0.658 | 0.927 |
| 4054 | 0.655 | 0.909 |
| 4055 | 0.685 | 0.917 |
| 4056 | 0.685 | 0.929 |
| 4057 | 0.638 | 0.922 |
| 4058 | 0.679 | 0.924 |
| 4059 | 0.679 | 0.920 |
| 4060 | 0.700 | 0.920 |
| 4061 | 0.691 | 0.930 |
| 4062 | 0.685 | 0.913 |
| 4063 | 0.648 | 0.919 |
| 4064 | 0.670 | 0.916 |
| 4065 | 0.645 | 0.918 |

|      |       |       |
|------|-------|-------|
| 4066 | 0.658 | 0.923 |
| 4067 | 0.652 | 0.926 |
| 4068 | 0.668 | 0.922 |
| 4069 | 0.689 | 0.928 |
| 4070 | 0.639 | 0.914 |
| 4071 | 0.689 | 0.912 |
| 4072 | 0.683 | 0.911 |
| 4073 | 0.659 | 0.907 |
| 4074 | 0.629 | 0.908 |
| 4075 | 0.687 | 0.934 |
| 4076 | 0.659 | 0.938 |
| 4077 | 0.695 | 0.918 |
| 4078 | 0.651 | 0.923 |
| 4079 | 0.654 | 0.910 |
| 4080 | 0.647 | 0.922 |
| 4081 | 0.658 | 0.925 |
| 4082 | 0.672 | 0.914 |
| 4083 | 0.640 | 0.916 |
| 4084 | 0.608 | 0.907 |
| 4085 | 0.676 | 0.914 |
| 4086 | 0.674 | 0.917 |
| 4087 | 0.631 | 0.924 |
| 4088 | 0.671 | 0.915 |
| 4089 | 0.652 | 0.933 |
| 4090 | 0.633 | 0.930 |
| 4091 | 0.728 | 0.917 |
| 4092 | 0.682 | 0.911 |
| 4093 | 0.657 | 0.921 |
| 4094 | 0.660 | 0.920 |
| 4095 | 0.679 | 0.920 |
| 4096 | 0.671 | 0.918 |
| 4097 | 0.688 | 0.913 |
| 4098 | 0.686 | 0.923 |
| 4099 | 0.622 | 0.919 |
| 4100 | 0.662 | 0.907 |
| 4101 | 0.686 | 0.915 |
| 4102 | 0.656 | 0.919 |
| 4103 | 0.670 | 0.929 |
| 4104 | 0.639 | 0.921 |

|      |       |       |
|------|-------|-------|
| 4105 | 0.673 | 0.918 |
| 4106 | 0.678 | 0.911 |
| 4107 | 0.720 | 0.922 |
| 4108 | 0.648 | 0.930 |
| 4109 | 0.703 | 0.918 |
| 4110 | 0.661 | 0.930 |
| 4111 | 0.670 | 0.916 |
| 4112 | 0.666 | 0.924 |
| 4113 | 0.677 | 0.913 |
| 4114 | 0.678 | 0.924 |
| 4115 | 0.670 | 0.921 |
| 4116 | 0.666 | 0.917 |
| 4117 | 0.648 | 0.911 |
| 4118 | 0.671 | 0.917 |
| 4119 | 0.627 | 0.930 |
| 4120 | 0.659 | 0.915 |
| 4121 | 0.687 | 0.918 |
| 4122 | 0.662 | 0.923 |
| 4123 | 0.669 | 0.914 |
| 4124 | 0.668 | 0.921 |
| 4125 | 0.669 | 0.918 |
| 4126 | 0.658 | 0.923 |
| 4127 | 0.659 | 0.926 |
| 4128 | 0.649 | 0.916 |
| 4129 | 0.666 | 0.926 |
| 4130 | 0.666 | 0.923 |
| 4131 | 0.671 | 0.927 |
| 4132 | 0.698 | 0.908 |
| 4133 | 0.717 | 0.907 |
| 4134 | 0.673 | 0.908 |
| 4135 | 0.635 | 0.921 |
| 4136 | 0.678 | 0.921 |
| 4137 | 0.658 | 0.931 |
| 4138 | 0.656 | 0.925 |
| 4139 | 0.706 | 0.929 |
| 4140 | 0.672 | 0.925 |
| 4141 | 0.712 | 0.906 |
| 4142 | 0.645 | 0.919 |
| 4143 | 0.640 | 0.913 |

|      |       |       |
|------|-------|-------|
| 4144 | 0.652 | 0.910 |
| 4145 | 0.670 | 0.913 |
| 4146 | 0.704 | 0.910 |
| 4147 | 0.694 | 0.919 |
| 4148 | 0.638 | 0.922 |
| 4149 | 0.685 | 0.921 |
| 4150 | 0.689 | 0.932 |
| 4151 | 0.674 | 0.913 |
| 4152 | 0.679 | 0.924 |
| 4153 | 0.694 | 0.914 |
| 4154 | 0.653 | 0.915 |
| 4155 | 0.666 | 0.915 |
| 4156 | 0.650 | 0.924 |
| 4157 | 0.687 | 0.915 |
| 4158 | 0.663 | 0.918 |
| 4159 | 0.692 | 0.923 |
| 4160 | 0.652 | 0.917 |
| 4161 | 0.629 | 0.913 |
| 4162 | 0.672 | 0.929 |
| 4163 | 0.671 | 0.919 |
| 4164 | 0.706 | 0.920 |
| 4165 | 0.667 | 0.921 |
| 4166 | 0.669 | 0.930 |
| 4167 | 0.703 | 0.934 |
| 4168 | 0.637 | 0.923 |
| 4169 | 0.689 | 0.923 |
| 4170 | 0.621 | 0.920 |
| 4171 | 0.670 | 0.917 |
| 4172 | 0.647 | 0.921 |
| 4173 | 0.685 | 0.928 |
| 4174 | 0.687 | 0.921 |
| 4175 | 0.692 | 0.925 |
| 4176 | 0.662 | 0.929 |
| 4177 | 0.662 | 0.914 |
| 4178 | 0.658 | 0.908 |
| 4179 | 0.672 | 0.919 |
| 4180 | 0.689 | 0.925 |
| 4181 | 0.708 | 0.918 |
| 4182 | 0.665 | 0.913 |

|      |       |       |
|------|-------|-------|
| 4183 | 0.688 | 0.917 |
| 4184 | 0.670 | 0.929 |
| 4185 | 0.681 | 0.915 |
| 4186 | 0.675 | 0.927 |
| 4187 | 0.664 | 0.923 |
| 4188 | 0.662 | 0.927 |
| 4189 | 0.692 | 0.934 |
| 4190 | 0.679 | 0.911 |
| 4191 | 0.686 | 0.914 |
| 4192 | 0.674 | 0.915 |
| 4193 | 0.643 | 0.918 |
| 4194 | 0.692 | 0.931 |
| 4195 | 0.669 | 0.924 |
| 4196 | 0.643 | 0.918 |
| 4197 | 0.683 | 0.926 |
| 4198 | 0.646 | 0.921 |
| 4199 | 0.669 | 0.917 |
| 4200 | 0.693 | 0.914 |
| 4201 | 0.679 | 0.918 |
| 4202 | 0.701 | 0.911 |
| 4203 | 0.656 | 0.915 |
| 4204 | 0.656 | 0.909 |
| 4205 | 0.635 | 0.911 |
| 4206 | 0.655 | 0.915 |
| 4207 | 0.671 | 0.914 |
| 4208 | 0.647 | 0.922 |
| 4209 | 0.687 | 0.914 |
| 4210 | 0.687 | 0.923 |
| 4211 | 0.666 | 0.922 |
| 4212 | 0.663 | 0.916 |
| 4213 | 0.663 | 0.921 |
| 4214 | 0.618 | 0.928 |
| 4215 | 0.668 | 0.927 |
| 4216 | 0.672 | 0.913 |
| 4217 | 0.677 | 0.910 |
| 4218 | 0.632 | 0.913 |
| 4219 | 0.667 | 0.929 |
| 4220 | 0.700 | 0.923 |
| 4221 | 0.671 | 0.923 |

|      |       |       |
|------|-------|-------|
| 4222 | 0.681 | 0.919 |
| 4223 | 0.655 | 0.913 |
| 4224 | 0.703 | 0.911 |
| 4225 | 0.656 | 0.910 |
| 4226 | 0.681 | 0.913 |
| 4227 | 0.678 | 0.916 |
| 4228 | 0.674 | 0.917 |
| 4229 | 0.651 | 0.921 |
| 4230 | 0.663 | 0.916 |
| 4231 | 0.636 | 0.914 |
| 4232 | 0.660 | 0.932 |
| 4233 | 0.686 | 0.918 |
| 4234 | 0.635 | 0.925 |
| 4235 | 0.661 | 0.931 |
| 4236 | 0.626 | 0.914 |
| 4237 | 0.713 | 0.917 |
| 4238 | 0.682 | 0.918 |
| 4239 | 0.694 | 0.910 |
| 4240 | 0.659 | 0.915 |
| 4241 | 0.631 | 0.919 |
| 4242 | 0.705 | 0.927 |
| 4243 | 0.668 | 0.926 |
| 4244 | 0.719 | 0.922 |
| 4245 | 0.585 | 0.929 |
| 4246 | 0.674 | 0.914 |
| 4247 | 0.593 | 0.920 |
| 4248 | 0.658 | 0.918 |
| 4249 | 0.668 | 0.918 |
| 4250 | 0.667 | 0.895 |
| 4251 | 0.698 | 0.911 |
| 4252 | 0.686 | 0.913 |
| 4253 | 0.660 | 0.913 |
| 4254 | 0.662 | 0.902 |
| 4255 | 0.692 | 0.925 |
| 4256 | 0.662 | 0.915 |
| 4257 | 0.712 | 0.913 |
| 4258 | 0.660 | 0.926 |
| 4259 | 0.669 | 0.918 |
| 4260 | 0.670 | 0.920 |

|      |       |       |
|------|-------|-------|
| 4261 | 0.698 | 0.921 |
| 4262 | 0.681 | 0.917 |
| 4263 | 0.700 | 0.919 |
| 4264 | 0.655 | 0.925 |
| 4265 | 0.640 | 0.919 |
| 4266 | 0.663 | 0.908 |
| 4267 | 0.664 | 0.924 |
| 4268 | 0.660 | 0.919 |
| 4269 | 0.721 | 0.926 |
| 4270 | 0.657 | 0.920 |
| 4271 | 0.690 | 0.922 |
| 4272 | 0.685 | 0.924 |
| 4273 | 0.623 | 0.909 |
| 4274 | 0.651 | 0.926 |
| 4275 | 0.671 | 0.912 |
| 4276 | 0.620 | 0.920 |
| 4277 | 0.670 | 0.914 |
| 4278 | 0.666 | 0.913 |
| 4279 | 0.663 | 0.922 |
| 4280 | 0.695 | 0.923 |
| 4281 | 0.680 | 0.927 |
| 4282 | 0.671 | 0.923 |
| 4283 | 0.656 | 0.922 |
| 4284 | 0.659 | 0.923 |
| 4285 | 0.675 | 0.915 |
| 4286 | 0.696 | 0.923 |
| 4287 | 0.643 | 0.912 |
| 4288 | 0.700 | 0.922 |
| 4289 | 0.701 | 0.928 |
| 4290 | 0.687 | 0.908 |
| 4291 | 0.605 | 0.907 |
| 4292 | 0.670 | 0.924 |
| 4293 | 0.705 | 0.917 |
| 4294 | 0.693 | 0.921 |
| 4295 | 0.655 | 0.915 |
| 4296 | 0.664 | 0.926 |
| 4297 | 0.655 | 0.916 |
| 4298 | 0.683 | 0.916 |
| 4299 | 0.698 | 0.908 |



|      |       |       |
|------|-------|-------|
| 4300 | 0.689 | 0.918 |
| 4301 | 0.667 | 0.918 |
| 4302 | 0.689 | 0.932 |
| 4303 | 0.685 | 0.923 |
| 4304 | 0.693 | 0.918 |
| 4305 | 0.681 | 0.915 |
| 4306 | 0.669 | 0.907 |
| 4307 | 0.682 | 0.914 |
| 4308 | 0.640 | 0.928 |
| 4309 | 0.673 | 0.928 |
| 4310 | 0.693 | 0.913 |
| 4311 | 0.664 | 0.906 |
| 4312 | 0.624 | 0.929 |
| 4313 | 0.689 | 0.932 |
| 4314 | 0.733 | 0.922 |
| 4315 | 0.664 | 0.918 |
| 4316 | 0.667 | 0.915 |
| 4317 | 0.639 | 0.925 |
| 4318 | 0.701 | 0.928 |
| 4319 | 0.675 | 0.928 |
| 4320 | 0.672 | 0.930 |
| 4321 | 0.665 | 0.931 |
| 4322 | 0.654 | 0.919 |
| 4323 | 0.656 | 0.922 |
| 4324 | 0.696 | 0.925 |
| 4325 | 0.675 | 0.905 |
| 4326 | 0.642 | 0.915 |
| 4327 | 0.659 | 0.920 |
| 4328 | 0.662 | 0.918 |
| 4329 | 0.671 | 0.923 |
| 4330 | 0.728 | 0.924 |
| 4331 | 0.666 | 0.924 |
| 4332 | 0.680 | 0.918 |
| 4333 | 0.645 | 0.926 |
| 4334 | 0.689 | 0.902 |
| 4335 | 0.703 | 0.926 |
| 4336 | 0.663 | 0.930 |
| 4337 | 0.690 | 0.912 |
| 4338 | 0.678 | 0.924 |

|      |       |       |
|------|-------|-------|
| 4339 | 0.643 | 0.924 |
| 4340 | 0.647 | 0.897 |
| 4341 | 0.673 | 0.924 |
| 4342 | 0.661 | 0.927 |
| 4343 | 0.677 | 0.914 |
| 4344 | 0.635 | 0.922 |
| 4345 | 0.653 | 0.917 |
| 4346 | 0.685 | 0.926 |
| 4347 | 0.631 | 0.914 |
| 4348 | 0.659 | 0.920 |
| 4349 | 0.620 | 0.910 |
| 4350 | 0.702 | 0.927 |
| 4351 | 0.673 | 0.911 |
| 4352 | 0.621 | 0.918 |
| 4353 | 0.694 | 0.916 |
| 4354 | 0.667 | 0.914 |
| 4355 | 0.682 | 0.904 |
| 4356 | 0.711 | 0.920 |
| 4357 | 0.672 | 0.920 |
| 4358 | 0.686 | 0.912 |
| 4359 | 0.659 | 0.921 |
| 4360 | 0.717 | 0.916 |
| 4361 | 0.673 | 0.915 |
| 4362 | 0.679 | 0.913 |
| 4363 | 0.668 | 0.914 |
| 4364 | 0.654 | 0.926 |
| 4365 | 0.662 | 0.919 |
| 4366 | 0.693 | 0.930 |
| 4367 | 0.663 | 0.917 |
| 4368 | 0.669 | 0.915 |
| 4369 | 0.656 | 0.922 |
| 4370 | 0.708 | 0.913 |
| 4371 | 0.701 | 0.918 |
| 4372 | 0.636 | 0.921 |
| 4373 | 0.635 | 0.906 |
| 4374 | 0.682 | 0.925 |
| 4375 | 0.661 | 0.923 |
| 4376 | 0.679 | 0.902 |
| 4377 | 0.635 | 0.913 |

|      |       |       |
|------|-------|-------|
| 4378 | 0.646 | 0.925 |
| 4379 | 0.713 | 0.928 |
| 4380 | 0.701 | 0.925 |
| 4381 | 0.656 | 0.921 |
| 4382 | 0.687 | 0.914 |
| 4383 | 0.706 | 0.919 |
| 4384 | 0.695 | 0.931 |
| 4385 | 0.691 | 0.921 |
| 4386 | 0.669 | 0.922 |
| 4387 | 0.667 | 0.925 |
| 4388 | 0.633 | 0.927 |
| 4389 | 0.625 | 0.918 |
| 4390 | 0.641 | 0.912 |
| 4391 | 0.660 | 0.923 |
| 4392 | 0.682 | 0.936 |
| 4393 | 0.705 | 0.918 |
| 4394 | 0.695 | 0.915 |
| 4395 | 0.675 | 0.928 |
| 4396 | 0.637 | 0.919 |
| 4397 | 0.674 | 0.925 |
| 4398 | 0.643 | 0.923 |
| 4399 | 0.689 | 0.908 |
| 4400 | 0.676 | 0.909 |
| 4401 | 0.652 | 0.920 |
| 4402 | 0.675 | 0.919 |
| 4403 | 0.653 | 0.916 |
| 4404 | 0.643 | 0.922 |
| 4405 | 0.693 | 0.918 |
| 4406 | 0.655 | 0.925 |
| 4407 | 0.682 | 0.914 |
| 4408 | 0.682 | 0.920 |
| 4409 | 0.662 | 0.915 |
| 4410 | 0.689 | 0.918 |
| 4411 | 0.641 | 0.921 |
| 4412 | 0.678 | 0.919 |
| 4413 | 0.686 | 0.935 |
| 4414 | 0.678 | 0.924 |
| 4415 | 0.659 | 0.923 |
| 4416 | 0.660 | 0.909 |

|      |       |       |
|------|-------|-------|
| 4417 | 0.639 | 0.925 |
| 4418 | 0.641 | 0.913 |
| 4419 | 0.670 | 0.910 |
| 4420 | 0.633 | 0.925 |
| 4421 | 0.678 | 0.923 |
| 4422 | 0.653 | 0.907 |
| 4423 | 0.712 | 0.920 |
| 4424 | 0.626 | 0.915 |
| 4425 | 0.698 | 0.926 |
| 4426 | 0.677 | 0.915 |
| 4427 | 0.683 | 0.920 |
| 4428 | 0.644 | 0.917 |
| 4429 | 0.693 | 0.911 |
| 4430 | 0.709 | 0.908 |
| 4431 | 0.657 | 0.915 |
| 4432 | 0.721 | 0.918 |
| 4433 | 0.671 | 0.921 |
| 4434 | 0.662 | 0.925 |
| 4435 | 0.659 | 0.925 |
| 4436 | 0.664 | 0.924 |
| 4437 | 0.635 | 0.917 |
| 4438 | 0.667 | 0.924 |
| 4439 | 0.729 | 0.927 |
| 4440 | 0.693 | 0.921 |
| 4441 | 0.640 | 0.930 |
| 4442 | 0.669 | 0.914 |
| 4443 | 0.670 | 0.931 |
| 4444 | 0.714 | 0.926 |
| 4445 | 0.672 | 0.915 |
| 4446 | 0.702 | 0.918 |
| 4447 | 0.666 | 0.909 |
| 4448 | 0.664 | 0.926 |
| 4449 | 0.701 | 0.920 |
| 4450 | 0.652 | 0.909 |
| 4451 | 0.681 | 0.919 |
| 4452 | 0.636 | 0.933 |
| 4453 | 0.706 | 0.917 |
| 4454 | 0.664 | 0.930 |
| 4455 | 0.681 | 0.919 |

|      |       |       |
|------|-------|-------|
| 4456 | 0.656 | 0.920 |
| 4457 | 0.662 | 0.920 |
| 4458 | 0.716 | 0.922 |
| 4459 | 0.666 | 0.919 |
| 4460 | 0.671 | 0.923 |
| 4461 | 0.663 | 0.926 |
| 4462 | 0.648 | 0.908 |
| 4463 | 0.652 | 0.931 |
| 4464 | 0.628 | 0.921 |
| 4465 | 0.682 | 0.920 |
| 4466 | 0.715 | 0.918 |
| 4467 | 0.666 | 0.927 |
| 4468 | 0.693 | 0.930 |
| 4469 | 0.659 | 0.918 |
| 4470 | 0.690 | 0.926 |
| 4471 | 0.700 | 0.923 |
| 4472 | 0.666 | 0.918 |
| 4473 | 0.680 | 0.918 |
| 4474 | 0.673 | 0.918 |
| 4475 | 0.693 | 0.936 |
| 4476 | 0.661 | 0.922 |
| 4477 | 0.710 | 0.915 |
| 4478 | 0.663 | 0.915 |
| 4479 | 0.663 | 0.930 |
| 4480 | 0.659 | 0.931 |
| 4481 | 0.659 | 0.928 |
| 4482 | 0.612 | 0.919 |
| 4483 | 0.652 | 0.920 |
| 4484 | 0.661 | 0.922 |
| 4485 | 0.676 | 0.918 |
| 4486 | 0.678 | 0.915 |
| 4487 | 0.679 | 0.928 |
| 4488 | 0.689 | 0.922 |
| 4489 | 0.679 | 0.913 |
| 4490 | 0.682 | 0.924 |
| 4491 | 0.682 | 0.931 |
| 4492 | 0.687 | 0.929 |
| 4493 | 0.663 | 0.914 |
| 4494 | 0.671 | 0.915 |

|      |       |       |
|------|-------|-------|
| 4495 | 0.664 | 0.913 |
| 4496 | 0.681 | 0.908 |
| 4497 | 0.641 | 0.933 |
| 4498 | 0.648 | 0.912 |
| 4499 | 0.648 | 0.909 |
| 4500 | 0.693 | 0.919 |
| 4501 | 0.681 | 0.920 |
| 4502 | 0.639 | 0.930 |
| 4503 | 0.665 | 0.919 |
| 4504 | 0.690 | 0.915 |
| 4505 | 0.656 | 0.926 |
| 4506 | 0.673 | 0.920 |
| 4507 | 0.639 | 0.931 |
| 4508 | 0.635 | 0.922 |
| 4509 | 0.675 | 0.919 |
| 4510 | 0.688 | 0.923 |
| 4511 | 0.647 | 0.926 |
| 4512 | 0.685 | 0.904 |
| 4513 | 0.655 | 0.918 |
| 4514 | 0.666 | 0.924 |
| 4515 | 0.698 | 0.910 |
| 4516 | 0.622 | 0.918 |
| 4517 | 0.679 | 0.920 |
| 4518 | 0.687 | 0.917 |
| 4519 | 0.671 | 0.930 |
| 4520 | 0.667 | 0.917 |
| 4521 | 0.652 | 0.930 |
| 4522 | 0.648 | 0.919 |
| 4523 | 0.689 | 0.923 |
| 4524 | 0.681 | 0.922 |
| 4525 | 0.664 | 0.919 |
| 4526 | 0.662 | 0.918 |
| 4527 | 0.629 | 0.920 |
| 4528 | 0.667 | 0.914 |
| 4529 | 0.682 | 0.926 |
| 4530 | 0.649 | 0.917 |
| 4531 | 0.662 | 0.919 |
| 4532 | 0.662 | 0.911 |
| 4533 | 0.683 | 0.924 |

|      |       |       |
|------|-------|-------|
| 4534 | 0.705 | 0.908 |
| 4535 | 0.666 | 0.910 |
| 4536 | 0.683 | 0.912 |
| 4537 | 0.625 | 0.916 |
| 4538 | 0.685 | 0.915 |
| 4539 | 0.643 | 0.922 |
| 4540 | 0.675 | 0.908 |
| 4541 | 0.734 | 0.904 |
| 4542 | 0.681 | 0.913 |
| 4543 | 0.667 | 0.912 |
| 4544 | 0.651 | 0.910 |
| 4545 | 0.652 | 0.913 |
| 4546 | 0.668 | 0.927 |
| 4547 | 0.636 | 0.899 |
| 4548 | 0.639 | 0.919 |
| 4549 | 0.682 | 0.913 |
| 4550 | 0.694 | 0.908 |
| 4551 | 0.638 | 0.926 |
| 4552 | 0.625 | 0.930 |
| 4553 | 0.625 | 0.926 |
| 4554 | 0.647 | 0.918 |
| 4555 | 0.645 | 0.919 |
| 4556 | 0.695 | 0.913 |
| 4557 | 0.645 | 0.933 |
| 4558 | 0.683 | 0.915 |
| 4559 | 0.647 | 0.898 |
| 4560 | 0.658 | 0.932 |
| 4561 | 0.640 | 0.927 |
| 4562 | 0.646 | 0.924 |
| 4563 | 0.675 | 0.917 |
| 4564 | 0.684 | 0.923 |
| 4565 | 0.651 | 0.918 |
| 4566 | 0.656 | 0.924 |
| 4567 | 0.677 | 0.923 |
| 4568 | 0.670 | 0.916 |
| 4569 | 0.670 | 0.910 |
| 4570 | 0.644 | 0.936 |
| 4571 | 0.654 | 0.925 |
| 4572 | 0.703 | 0.927 |

|      |       |       |
|------|-------|-------|
| 4573 | 0.648 | 0.905 |
| 4574 | 0.673 | 0.909 |
| 4575 | 0.632 | 0.922 |
| 4576 | 0.658 | 0.908 |
| 4577 | 0.679 | 0.924 |
| 4578 | 0.645 | 0.916 |
| 4579 | 0.652 | 0.920 |
| 4580 | 0.628 | 0.912 |
| 4581 | 0.696 | 0.921 |
| 4582 | 0.679 | 0.927 |
| 4583 | 0.693 | 0.914 |
| 4584 | 0.679 | 0.913 |
| 4585 | 0.661 | 0.921 |
| 4586 | 0.675 | 0.928 |
| 4587 | 0.613 | 0.925 |
| 4588 | 0.612 | 0.915 |
| 4589 | 0.656 | 0.919 |
| 4590 | 0.657 | 0.917 |
| 4591 | 0.707 | 0.930 |
| 4592 | 0.677 | 0.933 |
| 4593 | 0.669 | 0.913 |
| 4594 | 0.661 | 0.903 |
| 4595 | 0.647 | 0.909 |
| 4596 | 0.616 | 0.924 |
| 4597 | 0.627 | 0.920 |
| 4598 | 0.647 | 0.922 |
| 4599 | 0.670 | 0.930 |
| 4600 | 0.651 | 0.928 |
| 4601 | 0.671 | 0.912 |
| 4602 | 0.637 | 0.925 |
| 4603 | 0.675 | 0.910 |
| 4604 | 0.681 | 0.916 |
| 4605 | 0.695 | 0.926 |
| 4606 | 0.635 | 0.909 |
| 4607 | 0.690 | 0.915 |
| 4608 | 0.641 | 0.911 |
| 4609 | 0.661 | 0.911 |
| 4610 | 0.646 | 0.927 |
| 4611 | 0.686 | 0.918 |



|      |       |       |
|------|-------|-------|
| 4612 | 0.673 | 0.906 |
| 4613 | 0.650 | 0.913 |
| 4614 | 0.674 | 0.925 |
| 4615 | 0.664 | 0.925 |
| 4616 | 0.692 | 0.919 |
| 4617 | 0.710 | 0.923 |
| 4618 | 0.680 | 0.895 |
| 4619 | 0.613 | 0.926 |
| 4620 | 0.662 | 0.912 |
| 4621 | 0.677 | 0.924 |
| 4622 | 0.668 | 0.919 |
| 4623 | 0.692 | 0.926 |
| 4624 | 0.652 | 0.916 |
| 4625 | 0.670 | 0.918 |
| 4626 | 0.704 | 0.914 |
| 4627 | 0.695 | 0.914 |
| 4628 | 0.649 | 0.911 |
| 4629 | 0.601 | 0.916 |
| 4630 | 0.685 | 0.922 |
| 4631 | 0.685 | 0.914 |
| 4632 | 0.674 | 0.925 |
| 4633 | 0.670 | 0.916 |
| 4634 | 0.635 | 0.920 |
| 4635 | 0.676 | 0.912 |
| 4636 | 0.646 | 0.903 |
| 4637 | 0.654 | 0.927 |
| 4638 | 0.674 | 0.928 |
| 4639 | 0.628 | 0.910 |
| 4640 | 0.633 | 0.915 |
| 4641 | 0.633 | 0.914 |
| 4642 | 0.660 | 0.924 |
| 4643 | 0.670 | 0.917 |
| 4644 | 0.675 | 0.904 |
| 4645 | 0.659 | 0.920 |
| 4646 | 0.647 | 0.914 |
| 4647 | 0.655 | 0.912 |
| 4648 | 0.640 | 0.900 |
| 4649 | 0.622 | 0.910 |
| 4650 | 0.660 | 0.924 |

|      |       |       |
|------|-------|-------|
| 4651 | 0.645 | 0.907 |
| 4652 | 0.643 | 0.915 |
| 4653 | 0.636 | 0.912 |
| 4654 | 0.681 | 0.909 |
| 4655 | 0.629 | 0.918 |
| 4656 | 0.674 | 0.917 |
| 4657 | 0.692 | 0.910 |
| 4658 | 0.669 | 0.918 |
| 4659 | 0.670 | 0.923 |
| 4660 | 0.667 | 0.918 |
| 4661 | 0.678 | 0.924 |
| 4662 | 0.689 | 0.918 |
| 4663 | 0.624 | 0.914 |
| 4664 | 0.682 | 0.924 |
| 4665 | 0.648 | 0.924 |
| 4666 | 0.632 | 0.907 |
| 4667 | 0.629 | 0.913 |
| 4668 | 0.632 | 0.924 |
| 4669 | 0.696 | 0.910 |
| 4670 | 0.674 | 0.920 |
| 4671 | 0.648 | 0.917 |
| 4672 | 0.644 | 0.915 |
| 4673 | 0.665 | 0.926 |
| 4674 | 0.613 | 0.926 |
| 4675 | 0.658 | 0.918 |
| 4676 | 0.587 | 0.929 |
| 4677 | 0.677 | 0.918 |
| 4678 | 0.626 | 0.921 |
| 4679 | 0.644 | 0.918 |
| 4680 | 0.665 | 0.910 |
| 4681 | 0.652 | 0.927 |
| 4682 | 0.678 | 0.919 |
| 4683 | 0.629 | 0.917 |
| 4684 | 0.670 | 0.916 |
| 4685 | 0.689 | 0.923 |
| 4686 | 0.697 | 0.929 |
| 4687 | 0.674 | 0.922 |
| 4688 | 0.655 | 0.915 |
| 4689 | 0.647 | 0.930 |

|      |       |       |
|------|-------|-------|
| 4690 | 0.701 | 0.922 |
| 4691 | 0.662 | 0.922 |
| 4692 | 0.663 | 0.905 |
| 4693 | 0.682 | 0.914 |
| 4694 | 0.685 | 0.915 |
| 4695 | 0.687 | 0.922 |
| 4696 | 0.617 | 0.914 |
| 4697 | 0.653 | 0.921 |
| 4698 | 0.650 | 0.909 |
| 4699 | 0.642 | 0.909 |
| 4700 | 0.695 | 0.920 |
| 4701 | 0.688 | 0.912 |
| 4702 | 0.668 | 0.937 |
| 4703 | 0.663 | 0.916 |
| 4704 | 0.679 | 0.923 |
| 4705 | 0.642 | 0.920 |
| 4706 | 0.684 | 0.912 |
| 4707 | 0.653 | 0.917 |
| 4708 | 0.662 | 0.913 |
| 4709 | 0.654 | 0.917 |
| 4710 | 0.661 | 0.916 |
| 4711 | 0.652 | 0.914 |
| 4712 | 0.674 | 0.922 |
| 4713 | 0.662 | 0.909 |
| 4714 | 0.708 | 0.919 |
| 4715 | 0.695 | 0.907 |
| 4716 | 0.657 | 0.914 |
| 4717 | 0.653 | 0.906 |
| 4718 | 0.674 | 0.916 |
| 4719 | 0.701 | 0.910 |
| 4720 | 0.678 | 0.922 |
| 4721 | 0.652 | 0.924 |
| 4722 | 0.656 | 0.922 |
| 4723 | 0.678 | 0.919 |
| 4724 | 0.665 | 0.924 |
| 4725 | 0.650 | 0.920 |
| 4726 | 0.659 | 0.912 |
| 4727 | 0.611 | 0.916 |
| 4728 | 0.654 | 0.920 |

|      |       |       |
|------|-------|-------|
| 4729 | 0.717 | 0.915 |
| 4730 | 0.635 | 0.924 |
| 4731 | 0.716 | 0.911 |
| 4732 | 0.705 | 0.923 |
| 4733 | 0.652 | 0.929 |
| 4734 | 0.673 | 0.933 |
| 4735 | 0.656 | 0.923 |
| 4736 | 0.623 | 0.918 |
| 4737 | 0.630 | 0.914 |
| 4738 | 0.671 | 0.907 |
| 4739 | 0.672 | 0.911 |
| 4740 | 0.643 | 0.920 |
| 4741 | 0.646 | 0.922 |
| 4742 | 0.677 | 0.914 |
| 4743 | 0.698 | 0.910 |
| 4744 | 0.688 | 0.910 |
| 4745 | 0.679 | 0.914 |
| 4746 | 0.637 | 0.916 |
| 4747 | 0.685 | 0.909 |
| 4748 | 0.695 | 0.919 |
| 4749 | 0.656 | 0.922 |
| 4750 | 0.635 | 0.913 |
| 4751 | 0.651 | 0.916 |
| 4752 | 0.653 | 0.918 |
| 4753 | 0.673 | 0.908 |
| 4754 | 0.650 | 0.918 |
| 4755 | 0.652 | 0.910 |
| 4756 | 0.687 | 0.904 |
| 4757 | 0.660 | 0.919 |
| 4758 | 0.666 | 0.918 |
| 4759 | 0.685 | 0.918 |
| 4760 | 0.670 | 0.930 |
| 4761 | 0.649 | 0.918 |
| 4762 | 0.654 | 0.915 |
| 4763 | 0.696 | 0.905 |
| 4764 | 0.655 | 0.918 |
| 4765 | 0.661 | 0.920 |
| 4766 | 0.677 | 0.900 |
| 4767 | 0.648 | 0.912 |

|      |       |       |
|------|-------|-------|
| 4768 | 0.655 | 0.907 |
| 4769 | 0.645 | 0.925 |
| 4770 | 0.698 | 0.930 |
| 4771 | 0.679 | 0.911 |
| 4772 | 0.678 | 0.916 |
| 4773 | 0.640 | 0.907 |
| 4774 | 0.656 | 0.912 |
| 4775 | 0.654 | 0.915 |
| 4776 | 0.662 | 0.919 |
| 4777 | 0.652 | 0.908 |
| 4778 | 0.654 | 0.921 |
| 4779 | 0.639 | 0.926 |
| 4780 | 0.663 | 0.918 |
| 4781 | 0.689 | 0.928 |
| 4782 | 0.628 | 0.907 |
| 4783 | 0.679 | 0.920 |
| 4784 | 0.644 | 0.918 |
| 4785 | 0.711 | 0.911 |
| 4786 | 0.664 | 0.923 |
| 4787 | 0.706 | 0.924 |
| 4788 | 0.671 | 0.920 |
| 4789 | 0.672 | 0.921 |
| 4790 | 0.665 | 0.916 |
| 4791 | 0.658 | 0.911 |
| 4792 | 0.696 | 0.923 |
| 4793 | 0.645 | 0.917 |
| 4794 | 0.686 | 0.918 |
| 4795 | 0.620 | 0.916 |
| 4796 | 0.659 | 0.922 |
| 4797 | 0.652 | 0.913 |
| 4798 | 0.718 | 0.909 |
| 4799 | 0.681 | 0.928 |
| 4800 | 0.673 | 0.909 |
| 4801 | 0.660 | 0.916 |
| 4802 | 0.686 | 0.908 |
| 4803 | 0.682 | 0.916 |
| 4804 | 0.673 | 0.919 |
| 4805 | 0.664 | 0.908 |
| 4806 | 0.668 | 0.902 |

|      |       |       |
|------|-------|-------|
| 4807 | 0.683 | 0.911 |
| 4808 | 0.655 | 0.922 |
| 4809 | 0.681 | 0.906 |
| 4810 | 0.647 | 0.916 |
| 4811 | 0.704 | 0.918 |
| 4812 | 0.677 | 0.915 |
| 4813 | 0.670 | 0.919 |
| 4814 | 0.620 | 0.917 |
| 4815 | 0.682 | 0.923 |
| 4816 | 0.614 | 0.920 |
| 4817 | 0.653 | 0.920 |
| 4818 | 0.669 | 0.918 |
| 4819 | 0.687 | 0.905 |
| 4820 | 0.639 | 0.922 |
| 4821 | 0.640 | 0.920 |
| 4822 | 0.643 | 0.904 |
| 4823 | 0.608 | 0.912 |
| 4824 | 0.721 | 0.927 |
| 4825 | 0.654 | 0.912 |
| 4826 | 0.661 | 0.916 |
| 4827 | 0.635 | 0.914 |
| 4828 | 0.649 | 0.922 |
| 4829 | 0.639 | 0.916 |
| 4830 | 0.655 | 0.921 |
| 4831 | 0.637 | 0.919 |
| 4832 | 0.653 | 0.913 |
| 4833 | 0.646 | 0.916 |
| 4834 | 0.715 | 0.923 |
| 4835 | 0.654 | 0.902 |
| 4836 | 0.685 | 0.922 |
| 4837 | 0.633 | 0.909 |
| 4838 | 0.642 | 0.919 |
| 4839 | 0.653 | 0.927 |
| 4840 | 0.631 | 0.917 |
| 4841 | 0.652 | 0.913 |
| 4842 | 0.672 | 0.916 |
| 4843 | 0.685 | 0.906 |
| 4844 | 0.670 | 0.918 |
| 4845 | 0.655 | 0.918 |

|      |       |       |
|------|-------|-------|
| 4846 | 0.656 | 0.911 |
| 4847 | 0.671 | 0.908 |
| 4848 | 0.636 | 0.902 |
| 4849 | 0.673 | 0.909 |
| 4850 | 0.659 | 0.919 |
| 4851 | 0.681 | 0.901 |
| 4852 | 0.655 | 0.905 |
| 4853 | 0.642 | 0.921 |
| 4854 | 0.653 | 0.913 |
| 4855 | 0.673 | 0.926 |
| 4856 | 0.603 | 0.908 |
| 4857 | 0.697 | 0.916 |
| 4858 | 0.664 | 0.913 |
| 4859 | 0.662 | 0.910 |
| 4860 | 0.663 | 0.912 |
| 4861 | 0.660 | 0.920 |
| 4862 | 0.657 | 0.921 |
| 4863 | 0.630 | 0.922 |
| 4864 | 0.701 | 0.909 |
| 4865 | 0.642 | 0.925 |
| 4866 | 0.675 | 0.917 |
| 4867 | 0.679 | 0.919 |
| 4868 | 0.642 | 0.928 |
| 4869 | 0.701 | 0.920 |
| 4870 | 0.662 | 0.912 |
| 4871 | 0.678 | 0.913 |
| 4872 | 0.635 | 0.909 |
| 4873 | 0.683 | 0.928 |
| 4874 | 0.663 | 0.920 |
| 4875 | 0.641 | 0.915 |
| 4876 | 0.644 | 0.914 |
| 4877 | 0.675 | 0.912 |
| 4878 | 0.648 | 0.916 |
| 4879 | 0.598 | 0.908 |
| 4880 | 0.675 | 0.913 |
| 4881 | 0.651 | 0.917 |
| 4882 | 0.661 | 0.922 |
| 4883 | 0.626 | 0.908 |
| 4884 | 0.640 | 0.916 |

|      |       |       |
|------|-------|-------|
| 4885 | 0.667 | 0.918 |
| 4886 | 0.665 | 0.927 |
| 4887 | 0.654 | 0.903 |
| 4888 | 0.714 | 0.911 |
| 4889 | 0.677 | 0.909 |
| 4890 | 0.615 | 0.923 |
| 4891 | 0.652 | 0.926 |
| 4892 | 0.666 | 0.917 |
| 4893 | 0.679 | 0.913 |
| 4894 | 0.696 | 0.917 |
| 4895 | 0.621 | 0.911 |
| 4896 | 0.620 | 0.914 |
| 4897 | 0.662 | 0.900 |
| 4898 | 0.657 | 0.909 |
| 4899 | 0.628 | 0.906 |
| 4900 | 0.666 | 0.911 |
| 4901 | 0.619 | 0.912 |
| 4902 | 0.664 | 0.915 |
| 4903 | 0.664 | 0.919 |
| 4904 | 0.632 | 0.925 |
| 4905 | 0.622 | 0.918 |
| 4906 | 0.660 | 0.919 |
| 4907 | 0.670 | 0.924 |
| 4908 | 0.673 | 0.909 |
| 4909 | 0.654 | 0.923 |
| 4910 | 0.633 | 0.923 |
| 4911 | 0.648 | 0.915 |
| 4912 | 0.652 | 0.922 |
| 4913 | 0.661 | 0.918 |
| 4914 | 0.686 | 0.928 |
| 4915 | 0.663 | 0.922 |
| 4916 | 0.666 | 0.908 |
| 4917 | 0.672 | 0.909 |
| 4918 | 0.708 | 0.904 |
| 4919 | 0.728 | 0.920 |
| 4920 | 0.673 | 0.920 |
| 4921 | 0.686 | 0.934 |
| 4922 | 0.687 | 0.922 |
| 4923 | 0.680 | 0.931 |



|      |       |       |
|------|-------|-------|
| 4924 | 0.662 | 0.914 |
| 4925 | 0.670 | 0.912 |
| 4926 | 0.666 | 0.915 |
| 4927 | 0.643 | 0.903 |
| 4928 | 0.732 | 0.919 |
| 4929 | 0.659 | 0.915 |
| 4930 | 0.667 | 0.902 |
| 4931 | 0.626 | 0.913 |
| 4932 | 0.689 | 0.917 |
| 4933 | 0.697 | 0.918 |
| 4934 | 0.655 | 0.914 |
| 4935 | 0.645 | 0.916 |
| 4936 | 0.702 | 0.922 |
| 4937 | 0.633 | 0.921 |
| 4938 | 0.672 | 0.908 |
| 4939 | 0.677 | 0.915 |
| 4940 | 0.700 | 0.903 |
| 4941 | 0.644 | 0.918 |
| 4942 | 0.702 | 0.917 |
| 4943 | 0.662 | 0.918 |
| 4944 | 0.641 | 0.907 |
| 4945 | 0.645 | 0.912 |
| 4946 | 0.689 | 0.926 |
| 4947 | 0.635 | 0.910 |
| 4948 | 0.629 | 0.923 |
| 4949 | 0.675 | 0.917 |
| 4950 | 0.671 | 0.915 |
| 4951 | 0.672 | 0.924 |
| 4952 | 0.674 | 0.916 |
| 4953 | 0.642 | 0.923 |
| 4954 | 0.681 | 0.927 |
| 4955 | 0.689 | 0.917 |
| 4956 | 0.646 | 0.911 |
| 4957 | 0.675 | 0.923 |
| 4958 | 0.678 | 0.911 |
| 4959 | 0.685 | 0.919 |
| 4960 | 0.673 | 0.921 |
| 4961 | 0.651 | 0.914 |
| 4962 | 0.644 | 0.922 |

|      |       |       |
|------|-------|-------|
| 4963 | 0.669 | 0.902 |
| 4964 | 0.602 | 0.918 |
| 4965 | 0.668 | 0.911 |
| 4966 | 0.662 | 0.917 |
| 4967 | 0.647 | 0.923 |
| 4968 | 0.653 | 0.923 |
| 4969 | 0.683 | 0.923 |
| 4970 | 0.670 | 0.909 |
| 4971 | 0.658 | 0.894 |
| 4972 | 0.651 | 0.916 |
| 4973 | 0.690 | 0.916 |
| 4974 | 0.652 | 0.929 |
| 4975 | 0.679 | 0.919 |
| 4976 | 0.670 | 0.914 |
| 4977 | 0.647 | 0.910 |
| 4978 | 0.668 | 0.910 |
| 4979 | 0.660 | 0.923 |
| 4980 | 0.682 | 0.922 |
| 4981 | 0.647 | 0.915 |
| 4982 | 0.673 | 0.913 |
| 4983 | 0.661 | 0.915 |
| 4984 | 0.664 | 0.918 |
| 4985 | 0.668 | 0.920 |
| 4986 | 0.710 | 0.900 |
| 4987 | 0.644 | 0.915 |
| 4988 | 0.658 | 0.915 |
| 4989 | 0.664 | 0.905 |
| 4990 | 0.620 | 0.913 |
| 4991 | 0.644 | 0.922 |
| 4992 | 0.664 | 0.927 |
| 4993 | 0.634 | 0.918 |
| 4994 | 0.645 | 0.916 |
| 4995 | 0.619 | 0.910 |
| 4996 | 0.668 | 0.909 |
| 4997 | 0.635 | 0.928 |
| 4998 | 0.639 | 0.930 |
| 4999 | 0.654 | 0.918 |
