# Supplementary material for: Identifying Patients with Atrioventricular Septal Defect in Down Syndrome Populations by Using Self-Normalizing Neural Networks and Feature Selection
Source: MDPI journal article supplement (doi:10.3390/genes9040208), 2018-04-12
Supplement: s1 [file s1]

**Supplementary Material S1.** Output feature list derived from MCFS method with first 5,000 features ranked by their RI values.

| Feature name        | Projections | classifiers | Nodes | RI    |
|---------------------|-------------|-------------|-------|-------|
| GENE_A_16_P41408273 | 133         | 314         | 316   | 7.419 |
| GENE_A_16_P03593084 | 145         | 241         | 242   | 7.798 |
| GENE_A_16_P03583086 | 167         | 365         | 367   | 8.640 |
| GENE_A_18_P13926919 | 164         | 271         | 278   | 8.064 |
| GENE_A_16_P03587947 | 158         | 243         | 244   | 7.079 |
| GENE_A_16_P21251330 | 150         | 271         | 276   | 5.804 |
| GENE_A_16_P21200216 | 176         | 249         | 252   | 6.321 |
| GENE_A_16_P41466725 | 139         | 210         | 214   | 4.795 |
| GENE_A_16_P41430034 | 137         | 238         | 240   | 4.675 |
| GENE_A_16_P58270038 | 141         | 215         | 216   | 4.664 |
| GENE_A_16_P21272549 | 146         | 185         | 186   | 4.702 |
| GENE_A_18_P13877404 | 144         | 183         | 184   | 4.506 |
| GENE_A_16_P21221207 | 161         | 206         | 207   | 4.996 |
| GENE_A_18_P13885289 | 139         | 196         | 196   | 4.172 |
| GENE_A_18_P22508932 | 132         | 157         | 161   | 3.662 |
| GENE_A_16_P41389893 | 145         | 164         | 173   | 3.955 |
| GENE_A_16_P58266545 | 127         | 198         | 199   | 3.456 |
| GENE_A_16_P58272455 | 162         | 132         | 132   | 4.131 |
| GENE_A_18_P13894033 | 147         | 112         | 114   | 3.637 |
| GENE_A_16_P58290676 | 143         | 131         | 132   | 3.530 |
| GENE_A_18_P13885100 | 142         | 141         | 142   | 3.464 |
| GENE_A_16_P03557267 | 135         | 141         | 142   | 3.160 |
| GENE_A_16_P41439471 | 157         | 151         | 154   | 3.643 |
| GENE_A_16_P58302227 | 179         | 153         | 154   | 4.071 |
| GENE_A_16_P58297974 | 157         | 176         | 177   | 3.568 |
| GENE_A_16_P58261137 | 152         | 128         | 129   | 3.389 |
| GENE_A_16_P58275119 | 165         | 181         | 183   | 3.586 |
| GENE_A_16_P03587490 | 155         | 112         | 112   | 3.361 |
| GENE_A_16_P21253139 | 169         | 168         | 169   | 3.561 |
| GENE_A_16_P03584079 | 161         | 157         | 158   | 3.340 |
| GENE_A_18_P13914646 | 161         | 174         | 175   | 3.332 |
| GENE_A_18_P13871234 | 170         | 136         | 137   | 3.505 |
| GENE_A_16_P58281738 | 146         | 111         | 111   | 2.935 |
| GENE_A_16_P41428190 | 146         | 109         | 109   | 2.929 |
| GENE_A_16_P21199499 | 155         | 142         | 144   | 3.075 |
| GENE_A_16_P58273213 | 166         | 143         | 145   | 3.167 |
| GENE_A_16_P41466811 | 150         | 121         | 122   | 2.848 |
| GENE_A_16_P21205029 | 162         | 170         | 172   | 3.052 |
| GENE_A_16_P41407690 | 148         | 113         | 114   | 2.764 |
| GENE_A_16_P58291425 | 147         | 121         | 123   | 2.673 |
| GENE_A_16_P41414343 | 167         | 134         | 136   | 3.030 |
| GENE_A_16_P21240676 | 147         | 100         | 103   | 2.664 |

|                     |     |     |     |       |
|---------------------|-----|-----|-----|-------|
| GENE_A_16_P41453138 | 149 | 108 | 108 | 2.654 |
| GENE_A_16_P58300439 | 150 | 115 | 118 | 2.662 |
| GENE_A_16_P21243857 | 152 | 124 | 127 | 2.696 |
| GENE_A_16_P34815756 | 158 | 103 | 103 | 2.801 |
| GENE_A_16_P58295469 | 137 | 115 | 115 | 2.425 |
| GENE_A_16_P41404890 | 153 | 115 | 116 | 2.690 |
| GENE_A_16_P41460341 | 163 | 127 | 128 | 2.859 |
| GENE_A_16_P03585823 | 134 | 109 | 111 | 2.343 |
| GENE_A_16_P58308119 | 144 | 110 | 113 | 2.502 |
| GENE_A_16_P41431008 | 144 | 115 | 116 | 2.501 |
| GENE_A_16_P21263068 | 149 | 88  | 88  | 2.574 |
| GENE_A_16_P03573977 | 155 | 109 | 110 | 2.631 |
| GENE_A_16_P21194153 | 153 | 120 | 121 | 2.546 |
| GENE_A_16_P03573323 | 144 | 113 | 113 | 2.292 |
| GENE_A_18_P13926910 | 171 | 102 | 106 | 2.699 |
| GENE_A_16_P21192551 | 154 | 105 | 105 | 2.399 |
| GENE_A_18_P13944845 | 137 | 82  | 83  | 2.115 |
| GENE_A_16_P58268657 | 149 | 94  | 95  | 2.253 |
| GENE_A_16_P03579831 | 148 | 103 | 103 | 2.233 |
| GENE_A_16_P58269185 | 140 | 89  | 90  | 2.063 |
| GENE_A_18_P13934893 | 157 | 106 | 106 | 2.304 |
| GENE_A_18_P13919845 | 145 | 103 | 105 | 2.118 |
| GENE_A_16_P21237952 | 129 | 86  | 87  | 1.884 |
| GENE_A_16_P21237367 | 162 | 86  | 88  | 2.357 |
| GENE_A_16_P03586322 | 167 | 109 | 110 | 2.427 |
| GENE_A_16_P03576985 | 153 | 72  | 73  | 2.207 |
| GENE_A_16_P58274089 | 151 | 98  | 99  | 2.176 |
| GENE_A_16_P21233544 | 142 | 98  | 98  | 2.040 |
| GENE_A_16_P58300783 | 168 | 100 | 102 | 2.385 |
| GENE_A_16_P58308874 | 148 | 76  | 76  | 2.097 |
| GENE_A_16_P41400147 | 154 | 119 | 121 | 2.179 |
| GENE_A_16_P58275223 | 154 | 81  | 82  | 2.171 |
| GENE_A_16_P58287351 | 157 | 112 | 114 | 2.198 |
| GENE_A_16_P58300641 | 143 | 89  | 91  | 2.000 |
| GENE_A_16_P03584898 | 163 | 103 | 104 | 2.274 |
| GENE_A_16_P03576542 | 145 | 81  | 81  | 2.020 |
| GENE_A_16_P21233912 | 165 | 91  | 92  | 2.286 |
| GENE_A_16_P21226562 | 141 | 96  | 96  | 1.949 |
| GENE_A_16_P58287972 | 159 | 80  | 82  | 2.190 |
| GENE_A_16_P58262537 | 154 | 77  | 77  | 2.101 |
| GENE_A_16_P03577414 | 135 | 98  | 98  | 1.834 |
| GENE_A_18_P13907430 | 159 | 93  | 94  | 2.135 |
| GENE_A_16_P58289619 | 158 | 96  | 97  | 2.093 |
| GENE_A_16_P41401278 | 153 | 102 | 102 | 2.011 |
| GENE_A_16_P03579784 | 164 | 92  | 93  | 2.152 |
| GENE_A_16_P21207547 | 154 | 68  | 68  | 2.019 |

|                     |     |     |     |       |
|---------------------|-----|-----|-----|-------|
| GENE_A_16_P03588317 | 145 | 81  | 81  | 1.898 |
| GENE_A_16_P21224887 | 134 | 75  | 79  | 1.749 |
| GENE_A_16_P03580724 | 139 | 92  | 92  | 1.814 |
| GENE_A_16_P41399222 | 159 | 79  | 82  | 2.070 |
| GENE_A_16_P21246335 | 133 | 96  | 98  | 1.730 |
| GENE_A_16_P03581646 | 145 | 77  | 78  | 1.882 |
| GENE_A_16_P41426828 | 132 | 78  | 80  | 1.708 |
| GENE_A_16_P58275881 | 140 | 90  | 93  | 1.808 |
| GENE_A_16_P41399158 | 152 | 76  | 77  | 1.947 |
| GENE_A_18_P22583234 | 161 | 92  | 93  | 2.059 |
| GENE_A_16_P58278364 | 148 | 98  | 98  | 1.879 |
| GENE_A_16_P21217005 | 135 | 87  | 87  | 1.713 |
| GENE_A_16_P58277171 | 153 | 83  | 83  | 1.940 |
| GENE_A_16_P21194939 | 152 | 112 | 112 | 1.922 |
| GENE_A_18_P13933405 | 132 | 82  | 86  | 1.658 |
| GENE_A_16_P58294940 | 149 | 98  | 99  | 1.858 |
| GENE_A_16_P21245392 | 142 | 85  | 85  | 1.770 |
| GENE_A_16_P21237178 | 164 | 104 | 105 | 2.044 |
| GENE_A_16_P41398884 | 160 | 96  | 96  | 1.978 |
| GENE_A_16_P21235365 | 148 | 79  | 81  | 1.817 |
| GENE_A_18_P13904910 | 154 | 90  | 90  | 1.889 |
| GENE_A_16_P58280694 | 141 | 58  | 58  | 1.725 |
| GENE_A_16_P41398494 | 136 | 72  | 72  | 1.659 |
| GENE_A_16_P21192533 | 140 | 75  | 75  | 1.676 |
| GENE_A_16_P21240389 | 145 | 81  | 83  | 1.735 |
| GENE_A_16_P03580926 | 132 | 58  | 59  | 1.574 |
| GENE_A_16_P58283685 | 163 | 100 | 101 | 1.932 |
| GENE_A_16_P03585115 | 143 | 65  | 66  | 1.689 |
| GENE_A_16_P58287902 | 154 | 85  | 87  | 1.812 |
| GENE_A_18_P22561155 | 153 | 77  | 78  | 1.798 |
| GENE_A_16_P58305302 | 129 | 62  | 62  | 1.513 |
| GENE_A_16_P21225031 | 146 | 69  | 70  | 1.706 |
| GENE_A_16_P58286962 | 148 | 83  | 84  | 1.723 |
| GENE_A_16_P58276798 | 159 | 84  | 84  | 1.848 |
| GENE_A_16_P41442752 | 140 | 71  | 71  | 1.622 |
| GENE_A_16_P41427810 | 148 | 76  | 77  | 1.699 |
| GENE_A_16_P03575796 | 171 | 101 | 102 | 1.958 |
| GENE_A_16_P03577776 | 162 | 80  | 80  | 1.849 |
| GENE_A_16_P21253274 | 151 | 86  | 86  | 1.716 |
| GENE_A_16_P58281088 | 128 | 60  | 60  | 1.452 |
| GENE_A_18_P13885076 | 138 | 76  | 77  | 1.562 |
| GENE_A_16_P58267505 | 143 | 73  | 74  | 1.617 |
| GENE_A_16_P41423700 | 144 | 75  | 75  | 1.624 |
| GENE_A_16_P21251340 | 143 | 69  | 70  | 1.605 |
| GENE_A_18_P13870659 | 171 | 81  | 81  | 1.916 |
| GENE_A_16_P03562873 | 157 | 94  | 94  | 1.759 |

|                     |     |    |    |       |
|---------------------|-----|----|----|-------|
| GENE_A_16_P58265849 | 151 | 90 | 90 | 1.688 |
| GENE_A_16_P58305388 | 152 | 95 | 96 | 1.680 |
| GENE_A_16_P21271612 | 150 | 83 | 83 | 1.650 |
| GENE_A_16_P03566324 | 162 | 75 | 75 | 1.765 |
| GENE_A_18_P13887948 | 138 | 68 | 69 | 1.499 |
| GENE_A_16_P03586959 | 159 | 65 | 65 | 1.713 |
| GENE_A_16_P21214165 | 148 | 70 | 71 | 1.592 |
| GENE_A_16_P21234994 | 150 | 72 | 72 | 1.612 |
| GENE_A_16_P03575365 | 159 | 73 | 73 | 1.700 |
| GENE_A_16_P03589228 | 164 | 93 | 95 | 1.743 |
| GENE_A_16_P58262210 | 151 | 67 | 69 | 1.601 |
| GENE_A_16_P21196628 | 132 | 60 | 60 | 1.395 |
| GENE_A_16_P41469755 | 118 | 56 | 56 | 1.247 |
| GENE_A_16_P03568027 | 169 | 89 | 89 | 1.775 |
| GENE_A_16_P21219961 | 147 | 79 | 80 | 1.539 |
| GENE_A_16_P21255646 | 157 | 77 | 77 | 1.636 |
| GENE_A_16_P58265232 | 133 | 60 | 60 | 1.375 |
| GENE_A_16_P21261458 | 136 | 54 | 55 | 1.398 |
| GENE_A_16_P03555366 | 138 | 66 | 68 | 1.416 |
| GENE_A_16_P21231234 | 161 | 80 | 80 | 1.650 |
| GENE_A_16_P41427337 | 161 | 81 | 84 | 1.641 |
| GENE_A_16_P21250588 | 169 | 66 | 67 | 1.723 |
| GENE_A_16_P21240656 | 145 | 77 | 77 | 1.474 |
| GENE_A_16_P03591209 | 157 | 92 | 92 | 1.588 |
| GENE_A_16_P21213708 | 138 | 59 | 59 | 1.392 |
| GENE_A_18_P13918493 | 145 | 69 | 69 | 1.461 |
| GENE_A_16_P21244975 | 156 | 70 | 70 | 1.565 |
| GENE_A_16_P41431790 | 155 | 79 | 80 | 1.555 |
| GENE_A_16_P41406695 | 140 | 50 | 50 | 1.403 |
| GENE_A_16_P03557380 | 155 | 75 | 75 | 1.536 |
| GENE_A_16_P58295086 | 140 | 68 | 68 | 1.384 |
| GENE_A_16_P58281394 | 152 | 71 | 71 | 1.502 |
| GENE_A_16_P21224448 | 159 | 81 | 82 | 1.565 |
| GENE_A_16_P21228578 | 153 | 79 | 79 | 1.504 |
| GENE_A_16_P21246729 | 145 | 69 | 70 | 1.424 |
| GENE_A_16_P21205844 | 123 | 46 | 46 | 1.207 |
| GENE_A_18_P13914606 | 151 | 67 | 67 | 1.468 |
| GENE_A_16_P21253880 | 174 | 92 | 93 | 1.689 |
| GENE_A_18_P22556456 | 132 | 46 | 46 | 1.279 |
| GENE_A_18_P22500830 | 151 | 65 | 66 | 1.452 |
| GENE_A_16_P58290918 | 143 | 60 | 60 | 1.371 |
| GENE_A_18_P22583269 | 186 | 63 | 63 | 1.773 |
| GENE_A_16_P41454487 | 165 | 87 | 87 | 1.570 |
| GENE_A_16_P21221113 | 159 | 69 | 70 | 1.498 |
| GENE_A_18_P13889431 | 171 | 87 | 88 | 1.603 |
| GENE_A_16_P21219964 | 169 | 94 | 94 | 1.577 |

|                     |     |    |    |       |
|---------------------|-----|----|----|-------|
| GENE_A_16_P21248704 | 145 | 61 | 62 | 1.353 |
| GENE_A_16_P41426129 | 147 | 77 | 78 | 1.364 |
| GENE_A_16_P21248248 | 144 | 54 | 54 | 1.335 |
| GENE_A_16_P21272296 | 154 | 69 | 70 | 1.421 |
| GENE_A_16_P58273068 | 180 | 88 | 90 | 1.646 |
| GENE_A_16_P41402565 | 133 | 58 | 58 | 1.208 |
| GENE_A_16_P58271577 | 163 | 65 | 65 | 1.474 |
| GENE_A_18_P13920176 | 174 | 91 | 92 | 1.570 |
| GENE_A_16_P58278867 | 164 | 75 | 75 | 1.454 |
| GENE_A_16_P58260068 | 160 | 72 | 73 | 1.416 |
| GENE_A_16_P58275016 | 148 | 69 | 69 | 1.306 |
| GENE_A_16_P21208955 | 149 | 62 | 62 | 1.311 |
| GENE_A_16_P03595339 | 147 | 64 | 64 | 1.289 |
| GENE_A_16_P21218979 | 177 | 83 | 83 | 1.552 |
| GENE_A_16_P03588485 | 139 | 61 | 61 | 1.218 |
| GENE_A_18_P13867158 | 149 | 63 | 65 | 1.303 |
| GENE_A_16_P41391313 | 172 | 74 | 74 | 1.504 |
| GENE_A_16_P03556074 | 178 | 70 | 71 | 1.553 |
| GENE_A_16_P03580728 | 134 | 58 | 58 | 1.169 |
| GENE_A_16_P21212542 | 150 | 62 | 62 | 1.301 |
| GENE_A_16_P03576977 | 163 | 63 | 63 | 1.412 |
| GENE_A_16_P21226041 | 161 | 67 | 67 | 1.389 |
| GENE_A_16_P21190577 | 133 | 59 | 59 | 1.146 |
| GENE_A_16_P58264653 | 139 | 66 | 66 | 1.196 |
| GENE_A_16_P21253634 | 151 | 62 | 62 | 1.298 |
| GENE_A_16_P03579786 | 171 | 58 | 59 | 1.469 |
| GENE_A_16_P58290468 | 151 | 55 | 55 | 1.290 |
| GENE_A_16_P58307144 | 154 | 55 | 56 | 1.314 |
| GENE_A_16_P03556088 | 156 | 61 | 61 | 1.331 |
| GENE_A_16_P03587253 | 155 | 62 | 62 | 1.322 |
| GENE_A_16_P41401335 | 161 | 71 | 71 | 1.370 |
| GENE_A_18_P13890273 | 147 | 54 | 54 | 1.250 |
| GENE_A_16_P41419656 | 149 | 59 | 60 | 1.259 |
| GENE_A_16_P21213745 | 134 | 50 | 51 | 1.131 |
| GENE_A_16_P41413895 | 149 | 72 | 72 | 1.256 |
| GENE_A_16_P21214786 | 147 | 67 | 67 | 1.231 |
| GENE_A_16_P21232404 | 167 | 69 | 71 | 1.395 |
| GENE_A_18_P13867296 | 157 | 73 | 74 | 1.310 |
| GENE_A_16_P34811079 | 146 | 54 | 54 | 1.216 |
| GENE_A_16_P58263772 | 150 | 68 | 68 | 1.243 |
| GENE_A_18_P22573177 | 128 | 55 | 56 | 1.061 |
| GENE_A_16_P58299604 | 150 | 60 | 60 | 1.236 |
| GENE_A_16_P21224039 | 160 | 54 | 54 | 1.317 |
| GENE_A_16_P03551407 | 142 | 49 | 49 | 1.165 |
| GENE_A_16_P03584219 | 142 | 51 | 51 | 1.162 |
| GENE_A_16_P41463628 | 130 | 51 | 51 | 1.060 |

|                     |     |    |    |       |
|---------------------|-----|----|----|-------|
| GENE_A_16_P03576057 | 138 | 46 | 48 | 1.121 |
| GENE_A_16_P41410453 | 168 | 62 | 62 | 1.364 |
| GENE_A_18_P13904124 | 154 | 59 | 59 | 1.248 |
| GENE_A_18_P13889749 | 147 | 57 | 57 | 1.190 |
| GENE_A_16_P41401708 | 171 | 62 | 64 | 1.381 |
| GENE_A_16_P03596152 | 149 | 60 | 61 | 1.203 |
| GENE_A_18_P13884087 | 148 | 64 | 64 | 1.192 |
| GENE_A_18_P13876058 | 152 | 59 | 59 | 1.223 |
| GENE_A_16_P21248569 | 144 | 53 | 54 | 1.156 |
| GENE_A_16_P03592779 | 152 | 54 | 54 | 1.220 |
| GENE_A_16_P21192759 | 147 | 58 | 59 | 1.179 |
| GENE_A_16_P21223519 | 161 | 63 | 64 | 1.290 |
| GENE_A_16_P41416190 | 163 | 65 | 65 | 1.305 |
| GENE_A_16_P21242783 | 163 | 62 | 63 | 1.303 |
| GENE_A_16_P21245765 | 148 | 55 | 55 | 1.178 |
| GENE_A_16_P21242947 | 133 | 58 | 58 | 1.058 |
| GENE_A_16_P58261734 | 149 | 60 | 61 | 1.184 |
| GENE_A_16_P21227071 | 137 | 43 | 45 | 1.088 |
| GENE_A_16_P58307669 | 141 | 40 | 41 | 1.119 |
| GENE_A_16_P58297009 | 159 | 54 | 57 | 1.262 |
| GENE_A_16_P21219146 | 140 | 53 | 54 | 1.109 |
| GENE_A_16_P41391412 | 154 | 61 | 61 | 1.219 |
| GENE_A_16_P58266792 | 174 | 57 | 58 | 1.377 |
| GENE_A_16_P41421471 | 143 | 51 | 52 | 1.127 |
| GENE_A_16_P21222368 | 131 | 50 | 50 | 1.030 |
| GENE_A_16_P58275950 | 170 | 66 | 67 | 1.333 |
| GENE_A_16_P03597424 | 162 | 61 | 61 | 1.270 |
| GENE_A_16_P21249299 | 142 | 50 | 50 | 1.113 |
| GENE_A_18_P13875284 | 138 | 43 | 43 | 1.080 |
| GENE_A_16_P58261804 | 149 | 60 | 60 | 1.165 |
| GENE_A_16_P58262136 | 156 | 57 | 57 | 1.219 |
| GENE_A_16_P21201076 | 153 | 40 | 40 | 1.194 |
| GENE_A_18_P13918191 | 150 | 52 | 54 | 1.166 |
| GENE_A_16_P21230892 | 143 | 64 | 66 | 1.111 |
| GENE_A_16_P34772588 | 156 | 46 | 46 | 1.211 |
| GENE_A_16_P58271576 | 161 | 59 | 59 | 1.250 |
| GENE_A_16_P58308424 | 137 | 48 | 49 | 1.062 |
| GENE_A_16_P21246644 | 140 | 59 | 59 | 1.082 |
| GENE_A_16_P58298957 | 144 | 50 | 50 | 1.111 |
| GENE_A_16_P21200062 | 153 | 53 | 54 | 1.176 |
| GENE_A_18_P13864033 | 162 | 62 | 63 | 1.241 |
| GENE_A_16_P58260114 | 174 | 59 | 59 | 1.326 |
| GENE_A_16_P58299276 | 146 | 60 | 60 | 1.112 |
| GENE_A_16_P03567576 | 157 | 56 | 57 | 1.188 |
| GENE_A_16_P03597388 | 153 | 66 | 66 | 1.157 |
| GENE_A_18_P13921978 | 163 | 51 | 51 | 1.231 |

|                     |     |    |    |       |
|---------------------|-----|----|----|-------|
| GENE_A_16_P21253048 | 154 | 65 | 65 | 1.160 |
| GENE_A_18_P13854404 | 160 | 45 | 46 | 1.201 |
| GENE_A_16_P58298669 | 160 | 53 | 53 | 1.200 |
| GENE_A_16_P41449184 | 155 | 53 | 54 | 1.162 |
| GENE_A_16_P58294683 | 156 | 61 | 64 | 1.170 |
| GENE_A_18_P22587799 | 150 | 61 | 61 | 1.125 |
| GENE_A_16_P58283049 | 158 | 61 | 62 | 1.179 |
| GENE_A_16_P34804678 | 164 | 45 | 45 | 1.220 |
| GENE_A_18_P22549986 | 159 | 54 | 54 | 1.182 |
| GENE_A_16_P41400113 | 154 | 57 | 57 | 1.145 |
| GENE_A_18_P22573908 | 146 | 45 | 45 | 1.084 |
| GENE_A_16_P03587037 | 153 | 56 | 56 | 1.129 |
| GENE_A_16_P34777562 | 131 | 41 | 41 | 0.964 |
| GENE_A_16_P58292004 | 155 | 48 | 48 | 1.140 |
| GENE_A_16_P41407166 | 144 | 45 | 45 | 1.058 |
| GENE_A_16_P41406320 | 138 | 49 | 49 | 1.012 |
| GENE_A_16_P41416290 | 159 | 57 | 57 | 1.165 |
| GENE_A_18_P13931607 | 184 | 54 | 54 | 1.343 |
| GENE_A_16_P41418366 | 164 | 67 | 68 | 1.196 |
| GENE_A_16_P03589361 | 160 | 53 | 53 | 1.167 |
| GENE_A_16_P21228807 | 138 | 37 | 38 | 1.006 |
| GENE_A_16_P41406429 | 146 | 57 | 57 | 1.063 |
| GENE_A_16_P41400984 | 166 | 53 | 54 | 1.206 |
| GENE_A_16_P58286851 | 153 | 43 | 43 | 1.111 |
| GENE_A_16_P58266361 | 119 | 36 | 36 | 0.862 |
| GENE_A_18_P13916728 | 159 | 63 | 64 | 1.151 |
| GENE_A_16_P21201091 | 139 | 49 | 50 | 1.005 |
| GENE_A_16_P21259494 | 131 | 43 | 43 | 0.947 |
| GENE_A_16_P58292259 | 132 | 47 | 48 | 0.953 |
| GENE_A_16_P03585686 | 148 | 55 | 56 | 1.068 |
| GENE_A_18_P13864621 | 159 | 58 | 58 | 1.146 |
| GENE_A_16_P58291858 | 154 | 67 | 67 | 1.110 |
| GENE_A_16_P41417051 | 152 | 48 | 48 | 1.091 |
| GENE_A_16_P41409477 | 157 | 60 | 60 | 1.127 |
| GENE_A_18_P22577181 | 146 | 56 | 56 | 1.046 |
| GENE_A_14_P104353   | 169 | 52 | 54 | 1.209 |
| GENE_A_16_P03561251 | 167 | 59 | 59 | 1.194 |
| GENE_A_16_P41458984 | 167 | 59 | 59 | 1.194 |
| GENE_A_18_P22589356 | 180 | 68 | 69 | 1.284 |
| GENE_A_18_P22486057 | 140 | 52 | 53 | 0.998 |
| GENE_A_16_P58265935 | 155 | 53 | 53 | 1.104 |
| GENE_A_16_P03552483 | 166 | 43 | 43 | 1.180 |
| GENE_A_16_P03555312 | 176 | 63 | 64 | 1.250 |
| GENE_A_16_P58293632 | 136 | 53 | 53 | 0.965 |
| GENE_A_16_P58278858 | 170 | 52 | 52 | 1.206 |
| GENE_A_16_P21198329 | 155 | 44 | 44 | 1.096 |

|                     |     |    |    |       |
|---------------------|-----|----|----|-------|
| GENE_A_16_P58282515 | 155 | 53 | 54 | 1.093 |
| GENE_A_16_P21239263 | 152 | 41 | 41 | 1.071 |
| GENE_A_16_P58299911 | 137 | 46 | 46 | 0.965 |
| GENE_A_16_P58290899 | 172 | 60 | 60 | 1.207 |
| GENE_A_16_P41397930 | 158 | 54 | 56 | 1.108 |
| GENE_A_16_P21231974 | 152 | 54 | 56 | 1.065 |
| GENE_A_16_P21243819 | 163 | 69 | 71 | 1.135 |
| GENE_A_16_P03572689 | 165 | 52 | 52 | 1.149 |
| GENE_A_16_P41450867 | 143 | 50 | 50 | 0.996 |
| GENE_A_16_P58301180 | 148 | 44 | 44 | 1.028 |
| GENE_A_16_P21228472 | 148 | 49 | 50 | 1.028 |
| GENE_A_16_P58280563 | 156 | 50 | 50 | 1.083 |
| GENE_A_16_P58283470 | 166 | 50 | 50 | 1.151 |
| GENE_A_16_P21262228 | 153 | 49 | 49 | 1.061 |
| GENE_A_16_P21246008 | 144 | 35 | 35 | 0.996 |
| GENE_A_18_P13893415 | 141 | 55 | 55 | 0.976 |
| GENE_A_16_P21254345 | 142 | 37 | 37 | 0.980 |
| GENE_A_16_P41408162 | 153 | 49 | 50 | 1.053 |
| GENE_A_16_P03579477 | 140 | 54 | 55 | 0.963 |
| GENE_A_16_P03590157 | 146 | 47 | 47 | 1.004 |
| GENE_A_18_P13889721 | 156 | 50 | 51 | 1.072 |
| GENE_A_14_P101341   | 143 | 48 | 49 | 0.978 |
| GENE_A_18_P13864952 | 154 | 43 | 43 | 1.052 |
| GENE_A_16_P21243847 | 140 | 49 | 49 | 0.954 |
| GENE_A_18_P22582810 | 145 | 49 | 49 | 0.987 |
| GENE_A_16_P58303800 | 161 | 51 | 51 | 1.096 |
| GENE_A_16_P58304940 | 133 | 52 | 53 | 0.905 |
| GENE_A_16_P58289867 | 136 | 46 | 46 | 0.923 |
| GENE_A_16_P21202268 | 145 | 45 | 45 | 0.982 |
| GENE_A_16_P03562798 | 140 | 40 | 40 | 0.945 |
| GENE_A_18_P22496335 | 158 | 51 | 51 | 1.065 |
| GENE_A_18_P13870780 | 163 | 42 | 44 | 1.099 |
| GENE_A_16_P21219120 | 152 | 38 | 39 | 1.022 |
| GENE_A_18_P22599388 | 153 | 39 | 42 | 1.027 |
| GENE_A_16_P21244510 | 156 | 49 | 49 | 1.045 |
| GENE_A_16_P58274139 | 147 | 46 | 46 | 0.983 |
| GENE_A_16_P21232755 | 184 | 65 | 66 | 1.228 |
| GENE_A_16_P58302201 | 142 | 55 | 56 | 0.948 |
| GENE_A_16_P03589435 | 142 | 46 | 47 | 0.947 |
| GENE_A_16_P21213648 | 136 | 44 | 45 | 0.905 |
| GENE_A_18_P13897597 | 146 | 53 | 54 | 0.970 |
| GENE_A_16_P58266506 | 145 | 50 | 50 | 0.961 |
| GENE_A_16_P03567787 | 168 | 56 | 56 | 1.112 |
| GENE_A_16_P03574364 | 168 | 50 | 50 | 1.111 |
| GENE_A_16_P58294847 | 160 | 52 | 53 | 1.058 |
| GENE_A_16_P41401596 | 125 | 37 | 37 | 0.825 |



|                     |     |    |    |       |
|---------------------|-----|----|----|-------|
| GENE_A_16_P41421592 | 186 | 68 | 69 | 1.227 |
| GENE_A_16_P41452968 | 137 | 44 | 45 | 0.903 |
| GENE_A_16_P21205331 | 159 | 55 | 57 | 1.044 |
| GENE_A_16_P21231205 | 158 | 47 | 47 | 1.037 |
| GENE_A_16_P58265118 | 153 | 47 | 47 | 1.001 |
| GENE_A_16_P58282345 | 142 | 43 | 43 | 0.929 |
| GENE_A_16_P41395085 | 127 | 38 | 39 | 0.829 |
| GENE_A_16_P41401383 | 140 | 39 | 39 | 0.912 |
| GENE_A_16_P41398164 | 168 | 51 | 51 | 1.093 |
| GENE_A_18_P22518689 | 154 | 43 | 43 | 1.002 |
| GENE_A_16_P58296452 | 157 | 44 | 45 | 1.018 |
| GENE_A_16_P21232586 | 161 | 53 | 53 | 1.044 |
| GENE_A_16_P03579363 | 147 | 42 | 42 | 0.952 |
| GENE_A_18_P22554603 | 162 | 45 | 45 | 1.047 |
| GENE_A_18_P13938503 | 154 | 49 | 50 | 0.995 |
| GENE_A_16_P41434481 | 161 | 50 | 53 | 1.040 |
| GENE_A_16_P03585048 | 151 | 54 | 55 | 0.974 |
| GENE_A_16_P41470093 | 143 | 50 | 51 | 0.922 |
| GENE_A_16_P41416022 | 163 | 49 | 49 | 1.050 |
| GENE_A_16_P21202932 | 150 | 50 | 50 | 0.966 |
| GENE_A_16_P58304848 | 160 | 61 | 61 | 1.027 |
| GENE_A_18_P13944852 | 149 | 50 | 50 | 0.956 |
| GENE_A_16_P58262476 | 154 | 49 | 49 | 0.987 |
| GENE_A_16_P21193937 | 154 | 50 | 51 | 0.987 |
| GENE_A_16_P21212954 | 178 | 60 | 61 | 1.139 |
| GENE_A_16_P03555984 | 156 | 51 | 51 | 0.994 |
| GENE_A_16_P41464767 | 145 | 39 | 39 | 0.922 |
| GENE_A_16_P58262610 | 144 | 49 | 49 | 0.915 |
| GENE_A_16_P34793258 | 135 | 41 | 42 | 0.857 |
| GENE_A_16_P41421283 | 149 | 45 | 46 | 0.945 |
| GENE_A_16_P58301534 | 150 | 42 | 42 | 0.951 |
| GENE_A_16_P03573216 | 156 | 44 | 44 | 0.986 |
| GENE_A_16_P21255466 | 146 | 46 | 46 | 0.923 |
| GENE_A_18_P13861999 | 146 | 42 | 42 | 0.917 |
| GENE_A_18_P13855069 | 158 | 46 | 46 | 0.993 |
| GENE_A_16_P58263165 | 124 | 49 | 49 | 0.778 |
| GENE_A_16_P41414505 | 165 | 50 | 50 | 1.034 |
| GENE_A_16_P03590560 | 136 | 42 | 42 | 0.852 |
| GENE_A_16_P58261522 | 118 | 34 | 34 | 0.738 |
| GENE_A_18_P13899148 | 141 | 43 | 43 | 0.881 |
| GENE_A_16_P58271644 | 127 | 26 | 26 | 0.793 |
| GENE_A_16_P21241049 | 150 | 45 | 45 | 0.935 |
| GENE_A_16_P58275796 | 164 | 51 | 53 | 1.020 |
| GENE_A_16_P41426414 | 170 | 59 | 59 | 1.056 |
| GENE_A_16_P58307709 | 149 | 45 | 45 | 0.925 |
| GENE_A_16_P21230094 | 147 | 48 | 49 | 0.910 |

|                     |     |    |    |       |
|---------------------|-----|----|----|-------|
| GENE_A_16_P21231922 | 166 | 35 | 35 | 1.027 |
| GENE_A_16_P21231177 | 130 | 36 | 37 | 0.804 |
| GENE_A_16_P58280627 | 150 | 51 | 51 | 0.926 |
| GENE_A_16_P41418597 | 153 | 49 | 50 | 0.944 |
| GENE_A_16_P03583886 | 178 | 52 | 52 | 1.097 |
| GENE_A_16_P58309612 | 144 | 42 | 43 | 0.886 |
| GENE_A_16_P03592416 | 133 | 41 | 42 | 0.817 |
| GENE_A_16_P03594858 | 154 | 46 | 47 | 0.944 |
| GENE_A_16_P21200065 | 155 | 45 | 45 | 0.949 |
| GENE_A_16_P21209798 | 134 | 39 | 39 | 0.820 |
| GENE_A_18_P13916873 | 125 | 39 | 39 | 0.763 |
| GENE_A_16_P03584273 | 166 | 55 | 56 | 1.009 |
| GENE_A_16_P21217437 | 146 | 39 | 39 | 0.886 |
| GENE_A_16_P21220831 | 132 | 47 | 47 | 0.800 |
| GENE_A_16_P03578642 | 178 | 46 | 46 | 1.078 |
| GENE_A_18_P13858353 | 166 | 44 | 45 | 1.005 |
| GENE_A_18_P22566132 | 165 | 47 | 49 | 0.997 |
| GENE_A_18_P13929854 | 152 | 45 | 45 | 0.917 |
| GENE_A_16_P58268343 | 140 | 42 | 43 | 0.844 |
| GENE_A_16_P21212724 | 146 | 42 | 43 | 0.880 |
| GENE_A_16_P41442687 | 143 | 45 | 45 | 0.861 |
| GENE_A_16_P58294660 | 153 | 40 | 40 | 0.921 |
| GENE_A_18_P22505538 | 159 | 43 | 43 | 0.956 |
| GENE_A_16_P58294426 | 152 | 39 | 39 | 0.914 |
| GENE_A_18_P22538337 | 166 | 54 | 54 | 0.997 |
| GENE_A_16_P41435949 | 168 | 41 | 41 | 1.008 |
| GENE_A_16_P03590558 | 146 | 43 | 44 | 0.876 |
| GENE_A_16_P58259782 | 134 | 36 | 36 | 0.803 |
| GENE_A_16_P41389850 | 147 | 42 | 42 | 0.881 |
| GENE_A_16_P41390427 | 151 | 44 | 46 | 0.904 |
| GENE_A_16_P21206138 | 137 | 39 | 39 | 0.820 |
| GENE_A_16_P41443419 | 158 | 52 | 52 | 0.942 |
| GENE_A_16_P03590300 | 153 | 47 | 50 | 0.912 |
| GENE_A_16_P03561293 | 157 | 43 | 46 | 0.936 |
| GENE_A_18_P13938241 | 139 | 30 | 30 | 0.829 |
| GENE_A_16_P03575839 | 149 | 30 | 30 | 0.888 |
| GENE_A_18_P13865099 | 145 | 35 | 36 | 0.863 |
| GENE_A_16_P58302866 | 145 | 42 | 43 | 0.863 |
| GENE_A_16_P58274439 | 165 | 46 | 46 | 0.982 |
| GENE_A_16_P58277275 | 138 | 35 | 35 | 0.820 |
| GENE_A_18_P13860011 | 149 | 41 | 41 | 0.885 |
| GENE_A_16_P58279801 | 153 | 51 | 51 | 0.907 |
| GENE_A_16_P58260322 | 155 | 45 | 45 | 0.918 |
| GENE_A_16_P21224036 | 145 | 39 | 39 | 0.858 |
| GENE_A_16_P21251471 | 162 | 48 | 49 | 0.958 |
| GENE_A_16_P21252158 | 154 | 43 | 45 | 0.910 |

|                     |     |    |    |       |
|---------------------|-----|----|----|-------|
| GENE_A_16_P21251039 | 137 | 40 | 40 | 0.808 |
| GENE_A_16_P58272968 | 142 | 45 | 45 | 0.837 |
| GENE_A_16_P21250568 | 156 | 43 | 44 | 0.919 |
| GENE_A_16_P21241136 | 129 | 26 | 26 | 0.759 |
| GENE_A_16_P58272729 | 168 | 39 | 41 | 0.988 |
| GENE_A_16_P21193882 | 141 | 38 | 39 | 0.828 |
| GENE_A_16_P21202741 | 151 | 44 | 47 | 0.887 |
| GENE_A_16_P21194469 | 144 | 35 | 37 | 0.845 |
| GENE_A_16_P21216506 | 143 | 43 | 43 | 0.837 |
| GENE_A_16_P41431380 | 175 | 51 | 51 | 1.022 |
| GENE_A_16_P21209130 | 155 | 43 | 43 | 0.905 |
| GENE_A_16_P58266631 | 137 | 32 | 32 | 0.799 |
| GENE_A_18_P22493793 | 127 | 38 | 38 | 0.740 |
| GENE_A_16_P58306985 | 153 | 45 | 45 | 0.891 |
| GENE_A_16_P41455907 | 153 | 42 | 45 | 0.890 |
| GENE_A_16_P58304027 | 142 | 31 | 31 | 0.825 |
| GENE_A_16_P21232433 | 180 | 57 | 57 | 1.042 |
| GENE_A_16_P03565058 | 149 | 46 | 46 | 0.862 |
| GENE_A_16_P41468990 | 151 | 51 | 51 | 0.873 |
| GENE_A_16_P58271362 | 147 | 43 | 44 | 0.850 |
| GENE_A_16_P41423365 | 167 | 49 | 49 | 0.965 |
| GENE_A_16_P21204615 | 172 | 44 | 45 | 0.993 |
| GENE_A_16_P21218703 | 160 | 42 | 42 | 0.924 |
| GENE_A_16_P21236080 | 152 | 40 | 41 | 0.877 |
| GENE_A_16_P21210370 | 151 | 40 | 41 | 0.869 |
| GENE_A_16_P58276945 | 127 | 38 | 39 | 0.731 |
| GENE_A_16_P41437338 | 164 | 41 | 41 | 0.943 |
| GENE_A_16_P03582742 | 124 | 39 | 39 | 0.712 |
| GENE_A_16_P58301369 | 153 | 51 | 51 | 0.876 |
| GENE_A_16_P58290406 | 154 | 39 | 39 | 0.881 |
| GENE_A_16_P03592085 | 148 | 32 | 32 | 0.845 |
| GENE_A_16_P58277400 | 151 | 40 | 40 | 0.861 |
| GENE_A_16_P03555800 | 134 | 34 | 34 | 0.762 |
| GENE_A_16_P21208702 | 139 | 29 | 29 | 0.789 |
| GENE_A_16_P21203993 | 152 | 37 | 37 | 0.863 |
| GENE_A_18_P22509056 | 181 | 49 | 50 | 1.027 |
| GENE_A_16_P58294454 | 164 | 43 | 44 | 0.930 |
| GENE_A_16_P03560104 | 158 | 42 | 44 | 0.894 |
| GENE_A_16_P21204722 | 144 | 42 | 44 | 0.813 |
| GENE_A_16_P03596809 | 132 | 36 | 37 | 0.745 |
| GENE_A_16_P41409759 | 153 | 43 | 43 | 0.863 |
| GENE_A_16_P03560741 | 146 | 38 | 38 | 0.821 |
| GENE_A_16_P21193972 | 161 | 43 | 44 | 0.904 |
| GENE_A_16_P58307810 | 153 | 42 | 42 | 0.858 |
| GENE_A_16_P41436946 | 146 | 53 | 53 | 0.819 |
| GENE_A_18_P13899404 | 148 | 41 | 42 | 0.829 |

|                     |     |    |    |       |
|---------------------|-----|----|----|-------|
| GENE_A_16_P41390748 | 156 | 40 | 40 | 0.873 |
| GENE_A_18_P22590255 | 184 | 56 | 56 | 1.028 |
| GENE_A_18_P13902431 | 161 | 44 | 46 | 0.900 |
| GENE_A_16_P41413316 | 149 | 44 | 46 | 0.832 |
| GENE_A_16_P41456045 | 149 | 36 | 36 | 0.831 |
| GENE_A_16_P03552982 | 163 | 58 | 59 | 0.908 |
| GENE_A_16_P21235345 | 162 | 44 | 44 | 0.901 |
| GENE_A_16_P41452892 | 161 | 42 | 43 | 0.895 |
| GENE_A_16_P03587422 | 162 | 49 | 49 | 0.901 |
| GENE_A_16_P03580001 | 138 | 38 | 40 | 0.767 |
| GENE_A_16_P41416991 | 132 | 38 | 38 | 0.734 |
| GENE_A_16_P21226905 | 147 | 41 | 41 | 0.816 |
| GENE_A_16_P21209084 | 136 | 31 | 32 | 0.751 |
| GENE_A_16_P03580477 | 158 | 32 | 32 | 0.873 |
| GENE_A_16_P03565942 | 145 | 45 | 45 | 0.800 |
| GENE_A_18_P13934433 | 161 | 41 | 42 | 0.887 |
| GENE_A_16_P21212157 | 156 | 40 | 41 | 0.858 |
| GENE_A_16_P58303981 | 153 | 53 | 53 | 0.841 |
| GENE_A_16_P34801962 | 161 | 47 | 47 | 0.885 |
| GENE_A_16_P41423393 | 160 | 49 | 50 | 0.878 |
| GENE_A_16_P21218959 | 138 | 38 | 38 | 0.756 |
| GENE_A_16_P03598246 | 161 | 41 | 42 | 0.880 |
| GENE_A_16_P41441717 | 145 | 39 | 40 | 0.792 |
| GENE_A_18_P13937934 | 156 | 39 | 39 | 0.851 |
| GENE_A_16_P21243681 | 166 | 51 | 52 | 0.905 |
| GENE_A_16_P58289031 | 157 | 42 | 42 | 0.852 |
| GENE_A_16_P41463291 | 144 | 39 | 39 | 0.780 |
| GENE_A_18_P13875252 | 145 | 37 | 37 | 0.785 |
| GENE_A_16_P21200307 | 163 | 41 | 41 | 0.877 |
| GENE_A_16_P21208993 | 137 | 38 | 39 | 0.737 |
| GENE_A_16_P58267514 | 140 | 34 | 35 | 0.751 |
| GENE_A_16_P58304623 | 142 | 41 | 43 | 0.760 |
| GENE_A_16_P41410706 | 159 | 43 | 43 | 0.850 |
| GENE_A_16_P58289981 | 138 | 37 | 39 | 0.737 |
| GENE_A_16_P58294567 | 142 | 40 | 42 | 0.757 |
| GENE_A_16_P21218049 | 138 | 40 | 40 | 0.735 |
| GENE_A_16_P21193700 | 153 | 36 | 37 | 0.814 |
| GENE_A_16_P41417766 | 145 | 45 | 46 | 0.771 |
| GENE_A_18_P13889177 | 153 | 34 | 35 | 0.814 |
| GENE_A_16_P21268256 | 155 | 44 | 44 | 0.824 |
| GENE_A_16_P03573288 | 158 | 32 | 32 | 0.840 |
| GENE_A_16_P58290383 | 154 | 39 | 40 | 0.818 |
| GENE_A_16_P21201693 | 147 | 46 | 46 | 0.781 |
| GENE_A_16_P58277848 | 161 | 41 | 41 | 0.855 |
| GENE_A_16_P03562705 | 170 | 45 | 47 | 0.901 |
| GENE_A_18_P13908378 | 138 | 36 | 36 | 0.730 |

|                     |     |    |    |       |
|---------------------|-----|----|----|-------|
| GENE_A_18_P13917560 | 168 | 43 | 43 | 0.888 |
| GENE_A_16_P58280030 | 154 | 34 | 37 | 0.812 |
| GENE_A_16_P03590470 | 157 | 39 | 40 | 0.828 |
| GENE_A_16_P03594058 | 156 | 42 | 44 | 0.820 |
| GENE_A_16_P21205896 | 158 | 37 | 38 | 0.831 |
| GENE_A_16_P41392945 | 188 | 46 | 46 | 0.987 |
| GENE_A_16_P03584022 | 149 | 39 | 39 | 0.782 |
| GENE_A_16_P21213714 | 142 | 34 | 35 | 0.745 |
| GENE_A_16_P21202826 | 145 | 40 | 41 | 0.761 |
| GENE_A_16_P58289122 | 161 | 38 | 42 | 0.843 |
| GENE_A_18_P13881444 | 129 | 40 | 40 | 0.675 |
| GENE_A_16_P58295598 | 141 | 46 | 46 | 0.737 |
| GENE_A_16_P58295296 | 132 | 36 | 36 | 0.690 |
| GENE_A_18_P13932424 | 153 | 44 | 45 | 0.799 |
| GENE_A_16_P21212800 | 145 | 39 | 39 | 0.756 |
| GENE_A_16_P21231086 | 143 | 35 | 36 | 0.745 |
| GENE_A_16_P21204628 | 167 | 35 | 35 | 0.869 |
| GENE_A_18_P13927711 | 164 | 44 | 45 | 0.853 |
| GENE_A_16_P03573537 | 144 | 40 | 40 | 0.748 |
| GENE_A_16_P41436428 | 168 | 43 | 44 | 0.873 |
| GENE_A_16_P21270736 | 143 | 35 | 35 | 0.742 |
| GENE_A_16_P41418310 | 162 | 33 | 33 | 0.840 |
| GENE_A_16_P58272190 | 152 | 49 | 49 | 0.787 |
| GENE_A_16_P58306598 | 164 | 32 | 33 | 0.848 |
| GENE_A_16_P21196093 | 149 | 38 | 38 | 0.770 |
| GENE_A_16_P58268615 | 160 | 42 | 42 | 0.826 |
| GENE_A_16_P41408414 | 142 | 31 | 32 | 0.732 |
| GENE_A_16_P58302265 | 158 | 35 | 35 | 0.814 |
| GENE_A_16_P58290441 | 166 | 24 | 24 | 0.855 |
| GENE_A_18_P22518176 | 184 | 46 | 46 | 0.947 |
| GENE_A_18_P13883654 | 176 | 40 | 40 | 0.906 |
| GENE_A_16_P58276227 | 153 | 38 | 38 | 0.786 |
| GENE_A_16_P21221459 | 169 | 40 | 41 | 0.868 |
| GENE_A_16_P58279342 | 137 | 34 | 34 | 0.704 |
| GENE_A_16_P41444932 | 143 | 35 | 35 | 0.734 |
| GENE_A_18_P13913528 | 148 | 36 | 36 | 0.759 |
| GENE_A_16_P41400273 | 141 | 28 | 28 | 0.723 |
| GENE_A_16_P41415646 | 157 | 37 | 37 | 0.802 |
| GENE_A_16_P21265143 | 153 | 47 | 47 | 0.782 |
| GENE_A_16_P58270816 | 158 | 38 | 39 | 0.806 |
| GENE_A_16_P21247064 | 166 | 39 | 39 | 0.846 |
| GENE_A_16_P03583504 | 138 | 30 | 30 | 0.704 |
| GENE_A_16_P58296607 | 155 | 41 | 41 | 0.789 |
| GENE_A_18_P22520638 | 142 | 35 | 36 | 0.722 |
| GENE_A_16_P41420386 | 158 | 34 | 34 | 0.803 |
| GENE_A_16_P03582129 | 148 | 40 | 40 | 0.750 |

|                     |     |    |    |       |
|---------------------|-----|----|----|-------|
| GENE_A_16_P03564611 | 151 | 40 | 40 | 0.764 |
| GENE_A_16_P21240042 | 169 | 41 | 41 | 0.855 |
| GENE_A_18_P22526710 | 144 | 37 | 37 | 0.729 |
| GENE_A_16_P41437504 | 163 | 41 | 42 | 0.823 |
| GENE_A_16_P21257919 | 160 | 53 | 53 | 0.807 |
| GENE_A_16_P21257582 | 153 | 29 | 29 | 0.771 |
| GENE_A_16_P58259905 | 170 | 43 | 43 | 0.857 |
| GENE_A_16_P03596344 | 165 | 47 | 47 | 0.831 |
| GENE_A_18_P13927536 | 145 | 42 | 42 | 0.730 |
| GENE_A_16_P03586380 | 138 | 37 | 37 | 0.693 |
| GENE_A_18_P13894490 | 165 | 40 | 40 | 0.827 |
| GENE_A_16_P21228461 | 151 | 41 | 42 | 0.757 |
| GENE_A_16_P41408423 | 133 | 28 | 28 | 0.666 |
| GENE_A_16_P03583677 | 159 | 31 | 31 | 0.796 |
| GENE_A_16_P03575986 | 148 | 36 | 37 | 0.741 |
| GENE_A_16_P21206222 | 147 | 29 | 29 | 0.735 |
| GENE_A_16_P21252159 | 162 | 36 | 36 | 0.809 |
| GENE_A_16_P21272543 | 158 | 33 | 34 | 0.788 |
| GENE_A_16_P58285245 | 159 | 39 | 39 | 0.792 |
| GENE_A_16_P58280924 | 165 | 37 | 37 | 0.822 |
| GENE_A_16_P21197688 | 171 | 48 | 48 | 0.852 |
| GENE_A_16_P03584645 | 175 | 41 | 41 | 0.870 |
| GENE_A_16_P21205249 | 141 | 33 | 33 | 0.700 |
| GENE_A_18_P13907111 | 130 | 35 | 35 | 0.643 |
| GENE_A_18_P22520417 | 156 | 47 | 49 | 0.771 |
| GENE_A_16_P58295099 | 151 | 42 | 42 | 0.745 |
| GENE_A_16_P03580107 | 144 | 32 | 32 | 0.711 |
| GENE_A_16_P58306120 | 159 | 43 | 43 | 0.784 |
| GENE_A_16_P41409068 | 134 | 33 | 34 | 0.661 |
| GENE_A_16_P21227082 | 143 | 32 | 32 | 0.705 |
| GENE_A_16_P58271131 | 164 | 42 | 43 | 0.808 |
| GENE_A_16_P21224524 | 155 | 36 | 36 | 0.763 |
| GENE_A_16_P21251919 | 138 | 34 | 34 | 0.680 |
| GENE_A_16_P41462796 | 143 | 39 | 39 | 0.704 |
| GENE_A_16_P58284882 | 161 | 42 | 43 | 0.791 |
| GENE_A_16_P41460613 | 149 | 38 | 39 | 0.731 |
| GENE_A_18_P13924872 | 153 | 31 | 31 | 0.751 |
| GENE_A_18_P13947514 | 165 | 41 | 42 | 0.810 |
| GENE_A_16_P58275790 | 154 | 40 | 40 | 0.753 |
| GENE_A_16_P34805273 | 159 | 43 | 44 | 0.777 |
| GENE_A_16_P21243526 | 147 | 32 | 32 | 0.718 |
| GENE_A_16_P21264119 | 146 | 33 | 33 | 0.712 |
| GENE_A_16_P21214247 | 144 | 30 | 30 | 0.701 |
| GENE_A_18_P22571299 | 154 | 40 | 41 | 0.750 |
| GENE_A_16_P58285484 | 148 | 37 | 38 | 0.719 |
| GENE_A_16_P58309498 | 138 | 31 | 31 | 0.669 |

|                     |     |    |    |       |
|---------------------|-----|----|----|-------|
| GENE_A_16_P41402841 | 159 | 28 | 28 | 0.771 |
| GENE_A_18_P13856612 | 125 | 30 | 30 | 0.606 |
| GENE_A_16_P03556338 | 147 | 33 | 36 | 0.712 |
| GENE_A_18_P22600376 | 165 | 44 | 44 | 0.799 |
| GENE_A_18_P22593922 | 166 | 41 | 41 | 0.803 |
| GENE_A_16_P21233422 | 149 | 39 | 39 | 0.720 |
| GENE_A_16_P58292125 | 162 | 40 | 41 | 0.783 |
| GENE_A_18_P13936268 | 147 | 27 | 27 | 0.710 |
| GENE_A_16_P03577394 | 172 | 39 | 39 | 0.831 |
| GENE_A_16_P58284189 | 144 | 42 | 43 | 0.695 |
| GENE_A_16_P41416572 | 153 | 36 | 36 | 0.739 |
| GENE_A_16_P21215041 | 139 | 31 | 31 | 0.670 |
| GENE_A_16_P21242084 | 163 | 36 | 36 | 0.785 |
| GENE_A_16_P03585327 | 175 | 31 | 31 | 0.843 |
| GENE_A_18_P22508124 | 140 | 36 | 37 | 0.673 |
| GENE_A_16_P58263039 | 141 | 34 | 35 | 0.677 |
| GENE_A_18_P13934631 | 130 | 31 | 31 | 0.624 |
| GENE_A_18_P22592771 | 153 | 31 | 31 | 0.734 |
| GENE_A_16_P58264253 | 155 | 28 | 28 | 0.744 |
| GENE_A_16_P58270036 | 153 | 41 | 41 | 0.733 |
| GENE_A_16_P58261421 | 141 | 34 | 35 | 0.675 |
| GENE_A_16_P21266407 | 158 | 37 | 37 | 0.756 |
| GENE_A_16_P21246940 | 131 | 22 | 22 | 0.627 |
| GENE_A_16_P03559922 | 133 | 29 | 30 | 0.636 |
| GENE_A_16_P03597674 | 160 | 34 | 34 | 0.765 |
| GENE_A_16_P58308238 | 161 | 38 | 38 | 0.770 |
| GENE_A_16_P21250071 | 127 | 37 | 37 | 0.605 |
| GENE_A_16_P58295094 | 157 | 36 | 36 | 0.748 |
| GENE_A_16_P03585482 | 118 | 25 | 25 | 0.562 |
| GENE_A_16_P03576536 | 142 | 34 | 34 | 0.676 |
| GENE_A_18_P22500504 | 159 | 37 | 37 | 0.757 |
| GENE_A_16_P58283125 | 154 | 33 | 34 | 0.733 |
| GENE_A_16_P03582514 | 174 | 37 | 37 | 0.828 |
| GENE_A_16_P03594829 | 172 | 39 | 39 | 0.818 |
| GENE_A_16_P58272704 | 151 | 34 | 34 | 0.717 |
| GENE_A_16_P03566518 | 153 | 28 | 29 | 0.726 |
| GENE_A_16_P03598064 | 142 | 30 | 30 | 0.673 |
| GENE_A_16_P21264322 | 172 | 42 | 42 | 0.814 |
| GENE_A_18_P22551097 | 155 | 37 | 37 | 0.734 |
| GENE_A_16_P03576956 | 163 | 37 | 38 | 0.770 |
| GENE_A_16_P58300403 | 147 | 30 | 30 | 0.694 |
| GENE_A_14_P102587   | 159 | 38 | 38 | 0.751 |
| GENE_A_16_P58294128 | 141 | 28 | 29 | 0.666 |
| GENE_A_16_P41427277 | 151 | 36 | 36 | 0.713 |
| GENE_A_16_P58307907 | 142 | 29 | 29 | 0.670 |
| GENE_A_16_P03572956 | 144 | 30 | 30 | 0.679 |

|                     |     |    |    |       |
|---------------------|-----|----|----|-------|
| GENE_A_16_P41431764 | 159 | 34 | 34 | 0.749 |
| GENE_A_16_P58266491 | 132 | 37 | 37 | 0.621 |
| GENE_A_16_P58299551 | 142 | 32 | 32 | 0.668 |
| GENE_A_16_P41393404 | 161 | 35 | 35 | 0.757 |
| GENE_A_16_P58293775 | 150 | 38 | 40 | 0.704 |
| GENE_A_18_P13858671 | 151 | 44 | 44 | 0.708 |
| GENE_A_16_P21203947 | 155 | 41 | 41 | 0.726 |
| GENE_A_16_P58281756 | 168 | 32 | 32 | 0.787 |
| GENE_A_16_P03560316 | 154 | 44 | 44 | 0.721 |
| GENE_A_16_P21239087 | 151 | 35 | 35 | 0.706 |
| GENE_A_18_P13907242 | 155 | 37 | 38 | 0.723 |
| GENE_A_16_P03555945 | 149 | 36 | 37 | 0.694 |
| GENE_A_16_P58302782 | 146 | 27 | 27 | 0.680 |
| GENE_A_16_P58289367 | 141 | 36 | 37 | 0.657 |
| GENE_A_16_P03560797 | 147 | 40 | 40 | 0.684 |
| GENE_A_16_P03576524 | 146 | 40 | 40 | 0.680 |
| GENE_A_16_P58260200 | 136 | 36 | 36 | 0.633 |
| GENE_A_18_P13888005 | 149 | 27 | 29 | 0.690 |
| GENE_A_18_P22531988 | 150 | 38 | 38 | 0.695 |
| GENE_A_16_P21272676 | 142 | 31 | 32 | 0.657 |
| GENE_A_16_P41398267 | 143 | 37 | 39 | 0.662 |
| GENE_A_16_P58260105 | 164 | 46 | 46 | 0.758 |
| GENE_A_16_P21232617 | 147 | 32 | 32 | 0.679 |
| GENE_A_16_P21194216 | 150 | 36 | 36 | 0.693 |
| GENE_A_16_P21208710 | 138 | 30 | 30 | 0.637 |
| GENE_A_16_P58274943 | 175 | 37 | 39 | 0.808 |
| GENE_A_16_P03590159 | 167 | 38 | 39 | 0.770 |
| GENE_A_18_P13909236 | 143 | 33 | 33 | 0.660 |
| GENE_A_16_P03588873 | 146 | 31 | 32 | 0.673 |
| GENE_A_16_P21203748 | 141 | 28 | 29 | 0.649 |
| GENE_A_16_P58270327 | 149 | 27 | 27 | 0.686 |
| GENE_A_16_P21263164 | 167 | 39 | 40 | 0.769 |
| GENE_A_16_P21242607 | 148 | 30 | 30 | 0.681 |
| GENE_A_16_P58282714 | 158 | 37 | 37 | 0.727 |
| GENE_A_16_P41452163 | 146 | 26 | 27 | 0.671 |
| GENE_A_16_P58309358 | 159 | 35 | 36 | 0.730 |
| GENE_A_16_P03597308 | 161 | 38 | 38 | 0.739 |
| GENE_A_18_P13863355 | 142 | 32 | 33 | 0.652 |
| GENE_A_16_P58278941 | 173 | 30 | 30 | 0.794 |
| GENE_A_16_P03594300 | 165 | 39 | 40 | 0.757 |
| GENE_A_16_P21251766 | 172 | 39 | 39 | 0.789 |
| GENE_A_16_P58293129 | 158 | 45 | 45 | 0.724 |
| GENE_A_16_P21223681 | 142 | 31 | 32 | 0.650 |
| GENE_A_16_P21226108 | 155 | 34 | 34 | 0.709 |
| GENE_A_16_P58280274 | 173 | 37 | 38 | 0.791 |
| GENE_A_16_P21219368 | 156 | 34 | 35 | 0.713 |



|                     |     |    |    |       |
|---------------------|-----|----|----|-------|
| GENE_A_16_P21245793 | 187 | 42 | 42 | 0.854 |
| GENE_A_16_P03591162 | 150 | 29 | 29 | 0.684 |
| GENE_A_16_P21195507 | 142 | 29 | 31 | 0.645 |
| GENE_A_16_P21242091 | 135 | 29 | 29 | 0.613 |
| GENE_A_18_P13923540 | 144 | 46 | 46 | 0.653 |
| GENE_A_16_P21231642 | 149 | 35 | 35 | 0.676 |
| GENE_A_18_P13926939 | 158 | 37 | 38 | 0.716 |
| GENE_A_18_P13892274 | 159 | 35 | 35 | 0.721 |
| GENE_A_16_P21214594 | 139 | 30 | 31 | 0.630 |
| GENE_A_16_P58277843 | 157 | 35 | 37 | 0.710 |
| GENE_A_16_P41397623 | 175 | 43 | 43 | 0.790 |
| GENE_A_16_P03579941 | 150 | 31 | 31 | 0.677 |
| GENE_A_16_P03584662 | 148 | 39 | 39 | 0.668 |
| GENE_A_16_P03551412 | 128 | 29 | 30 | 0.578 |
| GENE_A_18_P13886579 | 147 | 35 | 35 | 0.663 |
| GENE_A_16_P21208645 | 141 | 30 | 30 | 0.636 |
| GENE_A_18_P13920628 | 160 | 31 | 31 | 0.722 |
| GENE_A_16_P21192731 | 151 | 35 | 36 | 0.680 |
| GENE_A_16_P21249898 | 148 | 30 | 30 | 0.666 |
| GENE_A_18_P13898566 | 137 | 32 | 33 | 0.616 |
| GENE_A_16_P03567060 | 152 | 38 | 38 | 0.683 |
| GENE_A_18_P13878632 | 151 | 29 | 30 | 0.678 |
| GENE_A_18_P22565982 | 148 | 29 | 29 | 0.664 |
| GENE_A_16_P21216154 | 115 | 31 | 31 | 0.515 |
| GENE_A_16_P21233194 | 156 | 34 | 34 | 0.697 |
| GENE_A_16_P58304018 | 162 | 35 | 36 | 0.723 |
| GENE_A_16_P03553040 | 145 | 32 | 33 | 0.647 |
| GENE_A_16_P21266860 | 155 | 36 | 36 | 0.691 |
| GENE_A_16_P58266039 | 144 | 29 | 29 | 0.641 |
| GENE_A_16_P03596172 | 140 | 31 | 31 | 0.623 |
| GENE_A_16_P58288996 | 136 | 28 | 28 | 0.605 |
| GENE_A_16_P21272452 | 128 | 25 | 27 | 0.569 |
| GENE_A_16_P58271530 | 145 | 31 | 31 | 0.644 |
| GENE_A_16_P58286765 | 146 | 38 | 39 | 0.648 |
| GENE_A_16_P03551810 | 145 | 34 | 34 | 0.644 |
| GENE_A_16_P03585951 | 166 | 45 | 45 | 0.737 |
| GENE_A_16_P21198962 | 129 | 30 | 30 | 0.572 |
| GENE_A_18_P13934663 | 156 | 31 | 32 | 0.692 |
| GENE_A_16_P58273592 | 166 | 37 | 37 | 0.735 |
| GENE_A_16_P03581524 | 158 | 31 | 31 | 0.698 |
| GENE_A_16_P03578549 | 150 | 32 | 33 | 0.662 |
| GENE_A_18_P13854256 | 146 | 35 | 37 | 0.644 |
| GENE_A_16_P03587307 | 163 | 33 | 33 | 0.719 |
| GENE_A_16_P21202245 | 165 | 40 | 40 | 0.727 |
| GENE_A_16_P03593661 | 152 | 31 | 32 | 0.670 |
| GENE_A_18_P13882730 | 183 | 41 | 41 | 0.805 |

|                     |     |    |    |       |
|---------------------|-----|----|----|-------|
| GENE_A_16_P03597696 | 152 | 33 | 33 | 0.669 |
| GENE_A_16_P21220810 | 138 | 39 | 40 | 0.607 |
| GENE_A_16_P58288173 | 143 | 32 | 33 | 0.629 |
| GENE_A_16_P03575075 | 162 | 35 | 35 | 0.711 |
| GENE_A_18_P13882357 | 166 | 33 | 33 | 0.729 |
| GENE_A_16_P21193820 | 138 | 31 | 31 | 0.605 |
| GENE_A_16_P03579382 | 150 | 38 | 38 | 0.658 |
| GENE_A_18_P22587358 | 161 | 38 | 38 | 0.706 |
| GENE_A_16_P03587526 | 158 | 26 | 26 | 0.692 |
| GENE_A_16_P58304119 | 163 | 38 | 38 | 0.714 |
| GENE_A_16_P21252051 | 158 | 28 | 28 | 0.691 |
| GENE_A_16_P03567108 | 146 | 33 | 33 | 0.639 |
| GENE_A_16_P41386924 | 137 | 37 | 37 | 0.599 |
| GENE_A_16_P21200540 | 182 | 41 | 41 | 0.796 |
| GENE_A_18_P22597408 | 145 | 32 | 32 | 0.634 |
| GENE_A_16_P58303770 | 141 | 31 | 32 | 0.616 |
| GENE_A_14_P121273   | 168 | 32 | 32 | 0.734 |
| GENE_A_16_P41400501 | 159 | 33 | 33 | 0.694 |
| GENE_A_16_P58306963 | 140 | 31 | 31 | 0.611 |
| GENE_A_16_P03551604 | 140 | 30 | 31 | 0.611 |
| GENE_A_16_P58308188 | 151 | 33 | 34 | 0.659 |
| GENE_A_16_P41429541 | 126 | 32 | 32 | 0.549 |
| GENE_A_16_P21217211 | 164 | 34 | 35 | 0.715 |
| GENE_A_18_P13943653 | 140 | 27 | 28 | 0.610 |
| GENE_A_16_P41405858 | 124 | 29 | 29 | 0.539 |
| GENE_A_16_P41396052 | 157 | 27 | 27 | 0.681 |
| GENE_A_16_P58284773 | 149 | 29 | 30 | 0.646 |
| GENE_A_16_P03593767 | 159 | 34 | 34 | 0.690 |
| GENE_A_16_P58297587 | 158 | 37 | 38 | 0.684 |
| GENE_A_16_P41411581 | 147 | 36 | 37 | 0.636 |
| GENE_A_16_P41437398 | 161 | 33 | 33 | 0.696 |
| GENE_A_18_P22486729 | 146 | 33 | 34 | 0.632 |
| GENE_A_16_P21225110 | 157 | 27 | 27 | 0.679 |
| GENE_A_16_P21206759 | 137 | 24 | 24 | 0.592 |
| GENE_A_16_P21208779 | 146 | 32 | 32 | 0.631 |
| GENE_A_16_P03564200 | 169 | 36 | 37 | 0.730 |
| GENE_A_16_P41466730 | 154 | 34 | 34 | 0.665 |
| GENE_A_16_P41460653 | 134 | 23 | 23 | 0.579 |
| GENE_A_18_P13892804 | 140 | 26 | 26 | 0.604 |
| GENE_A_16_P58308018 | 156 | 29 | 29 | 0.673 |
| GENE_A_16_P03558327 | 150 | 29 | 30 | 0.647 |
| GENE_A_18_P22506518 | 158 | 36 | 37 | 0.681 |
| GENE_A_16_P58301782 | 155 | 32 | 33 | 0.668 |
| GENE_A_16_P58288557 | 175 | 36 | 36 | 0.753 |
| GENE_A_16_P41426459 | 143 | 30 | 30 | 0.615 |
| GENE_A_16_P58280697 | 176 | 40 | 40 | 0.757 |

|                     |     |    |    |       |
|---------------------|-----|----|----|-------|
| GENE_A_16_P41415871 | 128 | 29 | 29 | 0.551 |
| GENE_A_16_P03589793 | 144 | 32 | 33 | 0.620 |
| GENE_A_16_P03573409 | 155 | 36 | 36 | 0.667 |
| GENE_A_18_P13879556 | 150 | 31 | 31 | 0.645 |
| GENE_A_16_P58274053 | 153 | 35 | 38 | 0.658 |
| GENE_A_16_P21229783 | 146 | 36 | 37 | 0.627 |
| GENE_A_16_P03582643 | 155 | 38 | 38 | 0.665 |
| GENE_A_16_P21245176 | 130 | 27 | 27 | 0.558 |
| GENE_A_16_P58272533 | 166 | 31 | 31 | 0.712 |
| GENE_A_16_P21232828 | 154 | 28 | 28 | 0.660 |
| GENE_A_16_P58297060 | 159 | 29 | 29 | 0.682 |
| GENE_A_16_P58268902 | 164 | 35 | 36 | 0.703 |
| GENE_A_16_P21208681 | 149 | 40 | 40 | 0.638 |
| GENE_A_16_P21203812 | 173 | 38 | 40 | 0.740 |
| GENE_A_16_P21202721 | 148 | 25 | 25 | 0.633 |
| GENE_A_16_P03563255 | 146 | 30 | 30 | 0.624 |
| GENE_A_18_P13946992 | 152 | 37 | 37 | 0.650 |
| GENE_A_16_P03591764 | 146 | 36 | 36 | 0.623 |
| GENE_A_16_P58268479 | 149 | 34 | 34 | 0.636 |
| GENE_A_16_P58277130 | 134 | 29 | 29 | 0.572 |
| GENE_A_16_P03594214 | 157 | 32 | 32 | 0.670 |
| GENE_A_16_P03584840 | 147 | 33 | 34 | 0.626 |
| GENE_A_16_P21255929 | 161 | 28 | 28 | 0.686 |
| GENE_A_16_P21263643 | 148 | 32 | 32 | 0.630 |
| GENE_A_18_P13911443 | 156 | 29 | 29 | 0.664 |
| GENE_A_16_P58268544 | 148 | 34 | 34 | 0.629 |
| GENE_A_16_P58262723 | 128 | 29 | 29 | 0.544 |
| GENE_A_16_P58263433 | 156 | 34 | 35 | 0.663 |
| GENE_A_16_P41395614 | 144 | 34 | 36 | 0.612 |
| GENE_A_16_P34789507 | 140 | 32 | 33 | 0.594 |
| GENE_A_16_P58263839 | 161 | 39 | 39 | 0.683 |
| GENE_A_16_P58288656 | 147 | 33 | 33 | 0.623 |
| GENE_A_16_P03573719 | 142 | 29 | 29 | 0.601 |
| GENE_A_18_P22516155 | 153 | 31 | 31 | 0.648 |
| GENE_A_16_P41390612 | 153 | 32 | 32 | 0.647 |
| GENE_A_18_P22589094 | 143 | 33 | 33 | 0.604 |
| GENE_A_18_P13865344 | 140 | 29 | 30 | 0.591 |
| GENE_A_16_P41436292 | 153 | 35 | 36 | 0.646 |
| GENE_A_16_P21256601 | 143 | 30 | 30 | 0.603 |
| GENE_A_16_P58293814 | 140 | 24 | 24 | 0.591 |
| GENE_A_16_P58277064 | 166 | 43 | 43 | 0.700 |
| GENE_A_16_P41421103 | 129 | 25 | 25 | 0.544 |
| GENE_A_16_P58276192 | 158 | 32 | 32 | 0.666 |
| GENE_A_18_P22498529 | 149 | 39 | 40 | 0.627 |
| GENE_A_16_P21240282 | 161 | 27 | 28 | 0.678 |
| GENE_A_16_P03552396 | 160 | 35 | 35 | 0.674 |

|                     |     |    |    |       |
|---------------------|-----|----|----|-------|
| GENE_A_16_P58257478 | 144 | 27 | 28 | 0.606 |
| GENE_A_18_P22558062 | 158 | 34 | 35 | 0.665 |
| GENE_A_16_P21213128 | 162 | 39 | 40 | 0.682 |
| GENE_A_16_P58299299 | 166 | 23 | 23 | 0.698 |
| GENE_A_16_P03575143 | 128 | 28 | 29 | 0.538 |
| GENE_A_16_P21232301 | 160 | 36 | 36 | 0.672 |
| GENE_A_16_P21211778 | 140 | 31 | 32 | 0.588 |
| GENE_A_16_P41401855 | 134 | 31 | 32 | 0.563 |
| GENE_A_16_P58262935 | 169 | 38 | 39 | 0.709 |
| GENE_A_16_P58288482 | 158 | 35 | 35 | 0.663 |
| GENE_A_16_P41400026 | 159 | 31 | 32 | 0.667 |
| GENE_A_16_P21215180 | 184 | 35 | 36 | 0.772 |
| GENE_A_16_P03573901 | 153 | 32 | 32 | 0.640 |
| GENE_A_16_P21261955 | 172 | 36 | 37 | 0.719 |
| GENE_A_16_P58305474 | 143 | 26 | 26 | 0.598 |
| GENE_A_16_P58294009 | 138 | 21 | 21 | 0.576 |
| GENE_A_16_P21236043 | 141 | 33 | 33 | 0.588 |
| GENE_A_16_P58304292 | 157 | 34 | 34 | 0.655 |
| GENE_A_16_P58261136 | 151 | 37 | 38 | 0.629 |
| GENE_A_16_P21248473 | 167 | 26 | 27 | 0.696 |
| GENE_A_16_P41453235 | 132 | 30 | 30 | 0.550 |
| GENE_A_16_P41414046 | 143 | 26 | 26 | 0.596 |
| GENE_A_16_P58305538 | 119 | 26 | 26 | 0.495 |
| GENE_A_16_P21261795 | 153 | 32 | 32 | 0.636 |
| GENE_A_16_P58285924 | 146 | 21 | 21 | 0.606 |
| GENE_A_16_P21269143 | 139 | 26 | 26 | 0.577 |
| GENE_A_16_P21214967 | 173 | 36 | 37 | 0.718 |
| GENE_A_18_P13911361 | 143 | 31 | 32 | 0.593 |
| GENE_A_16_P21245894 | 147 | 26 | 27 | 0.610 |
| GENE_A_16_P58308062 | 151 | 31 | 31 | 0.626 |
| GENE_A_16_P03557639 | 153 | 36 | 37 | 0.634 |
| GENE_A_16_P21194019 | 149 | 35 | 35 | 0.616 |
| GENE_A_18_P13872834 | 136 | 27 | 28 | 0.562 |
| GENE_A_16_P03573713 | 136 | 30 | 30 | 0.561 |
| GENE_A_16_P58284074 | 151 | 33 | 33 | 0.622 |
| GENE_A_16_P21213168 | 147 | 26 | 28 | 0.606 |
| GENE_A_16_P58298067 | 164 | 30 | 30 | 0.676 |
| GENE_A_18_P13907727 | 149 | 33 | 33 | 0.614 |
| GENE_A_18_P13906320 | 153 | 32 | 32 | 0.629 |
| GENE_A_16_P21233381 | 132 | 27 | 27 | 0.543 |
| GENE_A_16_P21248573 | 128 | 25 | 25 | 0.526 |
| GENE_A_18_P13910213 | 152 | 31 | 33 | 0.625 |
| GENE_A_16_P58289104 | 178 | 30 | 31 | 0.731 |
| GENE_A_18_P22521072 | 153 | 29 | 29 | 0.627 |
| GENE_A_18_P13904024 | 143 | 32 | 32 | 0.586 |
| GENE_A_16_P03591765 | 150 | 33 | 33 | 0.614 |

|                     |     |    |    |       |
|---------------------|-----|----|----|-------|
| GENE_A_16_P21202422 | 169 | 38 | 39 | 0.692 |
| GENE_A_16_P41416286 | 158 | 31 | 32 | 0.647 |
| GENE_A_16_P58298767 | 159 | 33 | 34 | 0.650 |
| GENE_A_16_P58278802 | 139 | 29 | 29 | 0.568 |
| GENE_A_16_P21250920 | 135 | 24 | 24 | 0.551 |
| GENE_A_16_P58284871 | 171 | 37 | 37 | 0.698 |
| GENE_A_16_P21231426 | 166 | 32 | 32 | 0.678 |
| GENE_A_16_P58268773 | 140 | 27 | 27 | 0.571 |
| GENE_A_16_P41404256 | 177 | 34 | 34 | 0.721 |
| GENE_A_18_P13944535 | 164 | 34 | 34 | 0.668 |
| GENE_A_16_P41432285 | 127 | 19 | 19 | 0.517 |
| GENE_A_16_P03580945 | 142 | 30 | 30 | 0.578 |
| GENE_A_16_P58302519 | 171 | 37 | 37 | 0.696 |
| GENE_A_16_P58260330 | 155 | 35 | 35 | 0.630 |
| GENE_A_16_P03566385 | 169 | 34 | 34 | 0.687 |
| GENE_A_16_P03552160 | 146 | 30 | 30 | 0.594 |
| GENE_A_16_P41423623 | 138 | 26 | 27 | 0.561 |
| GENE_A_16_P03575343 | 146 | 26 | 27 | 0.593 |
| GENE_A_16_P21203818 | 140 | 28 | 28 | 0.569 |
| GENE_A_16_P58265348 | 137 | 27 | 28 | 0.557 |
| GENE_A_16_P03567678 | 141 | 27 | 27 | 0.572 |
| GENE_A_16_P58279654 | 143 | 26 | 26 | 0.580 |
| GENE_A_18_P22576901 | 136 | 27 | 27 | 0.552 |
| GENE_A_18_P13860165 | 150 | 29 | 29 | 0.608 |
| GENE_A_16_P58287831 | 156 | 33 | 34 | 0.631 |
| GENE_A_16_P03563744 | 151 | 30 | 31 | 0.611 |
| GENE_A_16_P58260337 | 154 | 25 | 25 | 0.623 |
| GENE_A_16_P21212249 | 174 | 36 | 36 | 0.704 |
| GENE_A_16_P58279889 | 139 | 32 | 32 | 0.562 |
| GENE_A_18_P13938995 | 146 | 24 | 24 | 0.590 |
| GENE_A_16_P03591537 | 145 | 31 | 31 | 0.586 |
| GENE_A_16_P41437069 | 142 | 25 | 25 | 0.574 |
| GENE_A_18_P22548725 | 142 | 22 | 22 | 0.573 |
| GENE_A_16_P03583117 | 162 | 34 | 35 | 0.653 |
| GENE_A_16_P58298993 | 146 | 31 | 31 | 0.588 |
| GENE_A_16_P58279594 | 144 | 28 | 28 | 0.580 |
| GENE_A_16_P03587137 | 138 | 21 | 21 | 0.556 |
| GENE_A_18_P13858328 | 195 | 38 | 38 | 0.785 |
| GENE_A_16_P21246969 | 154 | 25 | 26 | 0.620 |
| GENE_A_16_P21264815 | 144 | 21 | 21 | 0.580 |
| GENE_A_16_P03582332 | 164 | 35 | 35 | 0.660 |
| GENE_A_16_P58266570 | 147 | 31 | 31 | 0.591 |
| GENE_A_18_P22485147 | 131 | 32 | 35 | 0.527 |
| GENE_A_16_P21246737 | 146 | 30 | 30 | 0.587 |
| GENE_A_16_P03583531 | 146 | 32 | 32 | 0.586 |
| GENE_A_16_P21234324 | 164 | 31 | 31 | 0.659 |

|                     |     |    |    |       |
|---------------------|-----|----|----|-------|
| GENE_A_18_P13884056 | 148 | 29 | 29 | 0.593 |
| GENE_A_16_P58288209 | 137 | 30 | 30 | 0.549 |
| GENE_A_16_P21193170 | 154 | 35 | 35 | 0.617 |
| GENE_A_16_P21204437 | 166 | 27 | 27 | 0.665 |
| GENE_A_18_P22513215 | 142 | 35 | 36 | 0.569 |
| GENE_A_16_P21208708 | 146 | 31 | 31 | 0.585 |
| GENE_A_16_P41429539 | 154 | 31 | 31 | 0.617 |
| GENE_A_16_P34815721 | 141 | 24 | 24 | 0.564 |
| GENE_A_18_P13923262 | 140 | 28 | 28 | 0.560 |
| GENE_A_16_P21211323 | 155 | 33 | 33 | 0.620 |
| GENE_A_16_P58276217 | 153 | 31 | 31 | 0.612 |
| GENE_A_18_P13880141 | 164 | 30 | 30 | 0.656 |
| GENE_A_16_P21197741 | 147 | 26 | 26 | 0.588 |
| GENE_A_16_P03573860 | 143 | 28 | 29 | 0.571 |
| GENE_A_16_P21221605 | 148 | 25 | 27 | 0.591 |
| GENE_A_16_P21230831 | 159 | 37 | 37 | 0.634 |
| GENE_A_16_P41401397 | 169 | 35 | 35 | 0.674 |
| GENE_A_16_P03569743 | 164 | 34 | 34 | 0.654 |
| GENE_A_16_P03595822 | 151 | 22 | 22 | 0.602 |
| GENE_A_16_P21218859 | 152 | 28 | 28 | 0.606 |
| GENE_A_18_P13858470 | 144 | 34 | 34 | 0.574 |
| GENE_A_16_P58298857 | 159 | 25 | 25 | 0.633 |
| GENE_A_16_P03574443 | 167 | 37 | 37 | 0.665 |
| GENE_A_16_P34792067 | 146 | 28 | 28 | 0.581 |
| GENE_A_16_P03598311 | 148 | 32 | 32 | 0.588 |
| GENE_A_16_P58281573 | 170 | 36 | 36 | 0.675 |
| GENE_A_16_P58264996 | 152 | 25 | 25 | 0.603 |
| GENE_A_16_P41417983 | 161 | 38 | 38 | 0.639 |
| GENE_A_16_P03576112 | 146 | 29 | 29 | 0.579 |
| GENE_A_16_P21230870 | 157 | 28 | 28 | 0.622 |
| GENE_A_16_P58291130 | 142 | 36 | 36 | 0.563 |
| GENE_A_16_P41421617 | 150 | 31 | 31 | 0.594 |
| GENE_A_16_P21242098 | 153 | 27 | 28 | 0.606 |
| GENE_A_18_P13899178 | 172 | 35 | 35 | 0.680 |
| GENE_A_16_P03585192 | 162 | 36 | 36 | 0.640 |
| GENE_A_18_P13877545 | 169 | 35 | 35 | 0.668 |
| GENE_A_18_P22591074 | 157 | 35 | 36 | 0.620 |
| GENE_A_16_P21259430 | 143 | 24 | 25 | 0.565 |
| GENE_A_18_P22501294 | 146 | 33 | 33 | 0.576 |
| GENE_A_16_P03583200 | 135 | 32 | 32 | 0.533 |
| GENE_A_16_P03577137 | 144 | 26 | 26 | 0.568 |
| GENE_A_16_P21257018 | 175 | 38 | 38 | 0.689 |
| GENE_A_16_P58267465 | 177 | 33 | 33 | 0.697 |
| GENE_A_18_P22491874 | 140 | 27 | 27 | 0.551 |
| GENE_A_16_P03562833 | 153 | 38 | 38 | 0.602 |
| GENE_A_16_P58263492 | 129 | 22 | 22 | 0.507 |

|                     |     |    |    |       |
|---------------------|-----|----|----|-------|
| GENE_A_16_P41468736 | 152 | 31 | 31 | 0.598 |
| GENE_A_16_P21270278 | 154 | 35 | 35 | 0.605 |
| GENE_A_16_P58260377 | 148 | 31 | 32 | 0.580 |
| GENE_A_16_P58277167 | 168 | 31 | 32 | 0.658 |
| GENE_A_16_P58294745 | 177 | 38 | 38 | 0.692 |
| GENE_A_16_P21210544 | 173 | 39 | 39 | 0.677 |
| GENE_A_16_P21253423 | 142 | 27 | 27 | 0.555 |
| GENE_A_16_P21207598 | 139 | 28 | 28 | 0.543 |
| GENE_A_18_P13887892 | 157 | 28 | 28 | 0.613 |
| GENE_A_18_P13911410 | 146 | 25 | 26 | 0.570 |
| GENE_A_18_P22594890 | 161 | 24 | 24 | 0.629 |
| GENE_A_16_P58267950 | 142 | 31 | 31 | 0.554 |
| GENE_A_16_P58289736 | 149 | 19 | 19 | 0.581 |
| GENE_A_16_P41396047 | 168 | 39 | 39 | 0.655 |
| GENE_A_16_P58261450 | 149 | 27 | 27 | 0.581 |
| GENE_A_16_P41438938 | 163 | 28 | 28 | 0.636 |
| GENE_A_16_P21263686 | 130 | 27 | 27 | 0.506 |
| GENE_A_16_P58260968 | 148 | 30 | 30 | 0.576 |
| GENE_A_16_P03581453 | 162 | 36 | 38 | 0.630 |
| GENE_A_16_P58269380 | 157 | 35 | 35 | 0.610 |
| GENE_A_16_P58271753 | 147 | 30 | 30 | 0.571 |
| GENE_A_16_P21214268 | 147 | 30 | 30 | 0.571 |
| GENE_A_16_P58265561 | 148 | 27 | 27 | 0.575 |
| GENE_A_16_P21250808 | 154 | 33 | 33 | 0.598 |
| GENE_A_16_P03583592 | 143 | 29 | 29 | 0.555 |
| GENE_A_16_P41425226 | 170 | 36 | 37 | 0.659 |
| GENE_A_16_P58299913 | 161 | 34 | 35 | 0.624 |
| GENE_A_16_P58300528 | 148 | 32 | 32 | 0.574 |
| GENE_A_16_P21207623 | 148 | 29 | 30 | 0.574 |
| GENE_A_16_P21206207 | 148 | 32 | 32 | 0.573 |
| GENE_A_16_P41411245 | 171 | 25 | 25 | 0.662 |
| GENE_A_16_P21218244 | 151 | 27 | 27 | 0.585 |
| GENE_A_16_P21215392 | 161 | 25 | 25 | 0.623 |
| GENE_A_16_P21218381 | 136 | 28 | 29 | 0.526 |
| GENE_A_16_P21231105 | 147 | 27 | 27 | 0.568 |
| GENE_A_16_P58276816 | 161 | 27 | 27 | 0.622 |
| GENE_A_16_P58295876 | 182 | 28 | 28 | 0.703 |
| GENE_A_16_P58287755 | 171 | 32 | 33 | 0.660 |
| GENE_A_18_P13870720 | 136 | 21 | 21 | 0.525 |
| GENE_A_16_P58281591 | 147 | 27 | 27 | 0.567 |
| GENE_A_16_P58270779 | 150 | 27 | 27 | 0.578 |
| GENE_A_16_P21235066 | 140 | 30 | 32 | 0.540 |
| GENE_A_16_P21199425 | 155 | 25 | 25 | 0.597 |
| GENE_A_18_P22556607 | 163 | 35 | 35 | 0.627 |
| GENE_A_18_P13928501 | 143 | 28 | 28 | 0.550 |
| GENE_A_16_P21226520 | 119 | 24 | 24 | 0.458 |

|                     |     |    |    |       |
|---------------------|-----|----|----|-------|
| GENE_A_18_P13866623 | 158 | 26 | 26 | 0.607 |
| GENE_A_16_P41455506 | 163 | 37 | 37 | 0.626 |
| GENE_A_16_P21196657 | 166 | 33 | 34 | 0.638 |
| GENE_A_16_P58309417 | 151 | 31 | 32 | 0.580 |
| GENE_A_16_P21202952 | 153 | 25 | 25 | 0.587 |
| GENE_A_16_P41449486 | 158 | 29 | 29 | 0.607 |
| GENE_A_18_P13884463 | 133 | 22 | 22 | 0.510 |
| GENE_A_16_P58289978 | 152 | 27 | 27 | 0.583 |
| GENE_A_18_P13890545 | 133 | 26 | 26 | 0.510 |
| GENE_A_16_P58281800 | 147 | 25 | 26 | 0.563 |
| GENE_A_16_P21250257 | 169 | 29 | 31 | 0.648 |
| GENE_A_18_P22589351 | 146 | 28 | 29 | 0.559 |
| GENE_A_16_P58299381 | 169 | 24 | 25 | 0.647 |
| GENE_A_16_P41398237 | 140 | 29 | 29 | 0.536 |
| GENE_A_16_P58279287 | 145 | 28 | 28 | 0.554 |
| GENE_A_18_P13872723 | 142 | 29 | 29 | 0.543 |
| GENE_A_16_P21209280 | 127 | 27 | 29 | 0.485 |
| GENE_A_16_P03574265 | 138 | 29 | 29 | 0.527 |
| GENE_A_16_P21215243 | 157 | 30 | 30 | 0.600 |
| GENE_A_16_P21202966 | 134 | 30 | 30 | 0.512 |
| GENE_A_16_P58272447 | 141 | 22 | 23 | 0.538 |
| GENE_A_16_P41441024 | 153 | 25 | 25 | 0.584 |
| GENE_A_16_P03580971 | 156 | 30 | 30 | 0.595 |
| GENE_A_18_P13860216 | 131 | 25 | 25 | 0.500 |
| GENE_A_18_P22597196 | 163 | 30 | 30 | 0.622 |
| GENE_A_16_P58298489 | 159 | 27 | 27 | 0.605 |
| GENE_A_16_P03577139 | 152 | 33 | 33 | 0.578 |
| GENE_A_16_P58268279 | 163 | 30 | 30 | 0.620 |
| GENE_A_16_P21228415 | 180 | 32 | 32 | 0.684 |
| GENE_A_16_P21250901 | 158 | 31 | 31 | 0.600 |
| GENE_A_16_P41392482 | 162 | 32 | 32 | 0.615 |
| GENE_A_16_P58297321 | 125 | 23 | 23 | 0.474 |
| GENE_A_16_P21198100 | 142 | 26 | 26 | 0.539 |
| GENE_A_16_P58285405 | 187 | 36 | 36 | 0.709 |
| GENE_A_16_P58289569 | 142 | 20 | 21 | 0.538 |
| GENE_A_16_P03597051 | 150 | 29 | 29 | 0.569 |
| GENE_A_16_P58262968 | 145 | 24 | 25 | 0.550 |
| GENE_A_16_P21200621 | 151 | 30 | 30 | 0.572 |
| GENE_A_16_P58285950 | 147 | 25 | 25 | 0.557 |
| GENE_A_16_P21212355 | 155 | 29 | 29 | 0.587 |
| GENE_A_18_P22539499 | 130 | 27 | 27 | 0.492 |
| GENE_A_16_P03585118 | 153 | 24 | 24 | 0.579 |
| GENE_A_16_P58263261 | 145 | 32 | 32 | 0.548 |
| GENE_A_16_P03553144 | 144 | 26 | 27 | 0.543 |
| GENE_A_16_P58269632 | 138 | 23 | 23 | 0.520 |
| GENE_A_16_P21252225 | 153 | 29 | 29 | 0.577 |



|                     |     |    |    |       |
|---------------------|-----|----|----|-------|
| GENE_A_16_P03576912 | 166 | 31 | 31 | 0.625 |
| GENE_A_16_P21221092 | 144 | 25 | 26 | 0.542 |
| GENE_A_16_P03567696 | 137 | 19 | 19 | 0.515 |
| GENE_A_16_P21216993 | 145 | 26 | 26 | 0.545 |
| GENE_A_16_P21267889 | 166 | 31 | 32 | 0.624 |
| GENE_A_16_P58283728 | 166 | 31 | 31 | 0.624 |
| GENE_A_16_P21219713 | 144 | 29 | 29 | 0.541 |
| GENE_A_16_P03587856 | 151 | 24 | 24 | 0.568 |
| GENE_A_16_P41448771 | 155 | 29 | 29 | 0.582 |
| GENE_A_16_P21268254 | 154 | 29 | 29 | 0.578 |
| GENE_A_18_P13948564 | 155 | 30 | 30 | 0.582 |
| GENE_A_16_P21207436 | 156 | 28 | 28 | 0.585 |
| GENE_A_18_P22540839 | 158 | 33 | 33 | 0.592 |
| GENE_A_16_P58262600 | 145 | 29 | 29 | 0.544 |
| GENE_A_18_P22599703 | 151 | 33 | 33 | 0.566 |
| GENE_A_16_P21247203 | 153 | 25 | 25 | 0.573 |
| GENE_A_18_P22494891 | 152 | 24 | 24 | 0.569 |
| GENE_A_18_P13857267 | 145 | 26 | 26 | 0.543 |
| GENE_A_16_P21214385 | 146 | 23 | 26 | 0.547 |
| GENE_A_16_P58302523 | 155 | 32 | 32 | 0.580 |
| GENE_A_16_P58276818 | 152 | 25 | 26 | 0.569 |
| GENE_A_16_P58290242 | 129 | 24 | 24 | 0.483 |
| GENE_A_16_P03588733 | 149 | 29 | 29 | 0.557 |
| GENE_A_18_P22568748 | 159 | 29 | 29 | 0.595 |
| GENE_A_16_P03580110 | 161 | 25 | 25 | 0.602 |
| GENE_A_18_P13891202 | 158 | 27 | 28 | 0.591 |
| GENE_A_16_P58267002 | 144 | 22 | 22 | 0.538 |
| GENE_A_16_P58272728 | 158 | 21 | 21 | 0.591 |
| GENE_A_16_P03582904 | 137 | 31 | 31 | 0.512 |
| GENE_A_16_P03582933 | 167 | 33 | 33 | 0.624 |
| GENE_A_16_P03551624 | 136 | 22 | 22 | 0.508 |
| GENE_A_16_P21262501 | 143 | 29 | 30 | 0.534 |
| GENE_A_16_P03587267 | 138 | 25 | 25 | 0.515 |
| GENE_A_16_P21261614 | 138 | 23 | 25 | 0.515 |
| GENE_A_16_P21243325 | 164 | 32 | 32 | 0.611 |
| GENE_A_18_P13900585 | 151 | 26 | 27 | 0.563 |
| GENE_A_16_P21258998 | 161 | 27 | 27 | 0.600 |
| GENE_A_16_P41389109 | 147 | 33 | 33 | 0.547 |
| GENE_A_16_P55129880 | 147 | 28 | 28 | 0.547 |
| GENE_A_16_P58283570 | 156 | 29 | 29 | 0.580 |
| GENE_A_16_P21218965 | 170 | 35 | 37 | 0.632 |
| GENE_A_16_P03590467 | 150 | 28 | 29 | 0.558 |
| GENE_A_16_P03592678 | 164 | 31 | 31 | 0.610 |
| GENE_A_16_P58260356 | 135 | 29 | 30 | 0.502 |
| GENE_A_16_P03557591 | 136 | 29 | 29 | 0.505 |
| GENE_A_16_P03584435 | 147 | 30 | 30 | 0.545 |

|                     |     |    |    |       |
|---------------------|-----|----|----|-------|
| GENE_A_18_P13931139 | 177 | 35 | 35 | 0.656 |
| GENE_A_16_P03578439 | 164 | 29 | 29 | 0.608 |
| GENE_A_16_P58292204 | 133 | 27 | 28 | 0.493 |
| GENE_A_16_P03594707 | 181 | 25 | 25 | 0.670 |
| GENE_A_16_P03590987 | 152 | 24 | 24 | 0.562 |
| GENE_A_16_P41442506 | 152 | 26 | 26 | 0.562 |
| GENE_A_16_P41413762 | 141 | 29 | 29 | 0.521 |
| GENE_A_16_P58266609 | 176 | 29 | 29 | 0.650 |
| GENE_A_16_P58287327 | 162 | 31 | 31 | 0.598 |
| GENE_A_16_P03556252 | 142 | 24 | 24 | 0.524 |
| GENE_A_16_P21220871 | 157 | 33 | 33 | 0.579 |
| GENE_A_16_P58266321 | 156 | 26 | 26 | 0.575 |
| GENE_A_16_P21233182 | 146 | 30 | 30 | 0.538 |
| GENE_A_18_P13880482 | 150 | 26 | 26 | 0.553 |
| GENE_A_16_P03553097 | 152 | 25 | 25 | 0.560 |
| GENE_A_16_P03595771 | 142 | 26 | 26 | 0.523 |
| GENE_A_16_P58289698 | 154 | 28 | 29 | 0.567 |
| GENE_A_18_P13898658 | 159 | 27 | 27 | 0.585 |
| GENE_A_16_P21267910 | 143 | 26 | 26 | 0.526 |
| GENE_A_16_P58264888 | 159 | 27 | 28 | 0.585 |
| GENE_A_18_P13876046 | 149 | 29 | 29 | 0.548 |
| GENE_A_16_P41392273 | 162 | 31 | 31 | 0.595 |
| GENE_A_16_P58302977 | 156 | 26 | 26 | 0.573 |
| GENE_A_16_P21230747 | 144 | 23 | 23 | 0.529 |
| GENE_A_16_P58301326 | 162 | 29 | 29 | 0.594 |
| GENE_A_16_P41429911 | 137 | 21 | 21 | 0.502 |
| GENE_A_16_P41418755 | 138 | 22 | 23 | 0.506 |
| GENE_A_16_P03583649 | 140 | 26 | 26 | 0.513 |
| GENE_A_16_P58272894 | 167 | 29 | 29 | 0.612 |
| GENE_A_16_P58293285 | 142 | 24 | 25 | 0.520 |
| GENE_A_16_P41431270 | 153 | 31 | 31 | 0.561 |
| GENE_A_16_P58296920 | 153 | 30 | 30 | 0.561 |
| GENE_A_16_P41415245 | 139 | 27 | 27 | 0.509 |
| GENE_A_16_P21257058 | 148 | 38 | 38 | 0.542 |
| GENE_A_16_P03596544 | 151 | 29 | 29 | 0.552 |
| GENE_A_16_P41412651 | 164 | 26 | 26 | 0.600 |
| GENE_A_16_P21263666 | 134 | 27 | 28 | 0.490 |
| GENE_A_16_P21249848 | 149 | 30 | 30 | 0.545 |
| GENE_A_16_P41398628 | 157 | 28 | 28 | 0.574 |
| GENE_A_16_P03576973 | 157 | 27 | 27 | 0.574 |
| GENE_A_18_P13914151 | 162 | 33 | 33 | 0.592 |
| GENE_A_16_P41412367 | 158 | 25 | 25 | 0.576 |
| GENE_A_18_P13936866 | 170 | 34 | 34 | 0.619 |
| GENE_A_16_P58297431 | 152 | 30 | 30 | 0.554 |
| GENE_A_16_P03566062 | 146 | 36 | 38 | 0.532 |
| GENE_A_16_P21238254 | 162 | 30 | 30 | 0.589 |

|                     |     |    |    |       |
|---------------------|-----|----|----|-------|
| GENE_A_18_P13921025 | 139 | 25 | 25 | 0.506 |
| GENE_A_16_P03571275 | 167 | 31 | 31 | 0.607 |
| GENE_A_16_P21227489 | 148 | 29 | 29 | 0.538 |
| GENE_A_16_P03578115 | 165 | 32 | 32 | 0.599 |
| GENE_A_16_P03568906 | 150 | 25 | 25 | 0.545 |
| GENE_A_18_P13920729 | 153 | 32 | 32 | 0.555 |
| GENE_A_16_P21248228 | 170 | 32 | 34 | 0.617 |
| GENE_A_16_P58269875 | 168 | 27 | 27 | 0.609 |
| GENE_A_18_P13919468 | 138 | 25 | 25 | 0.500 |
| GENE_A_18_P13858759 | 140 | 35 | 35 | 0.507 |
| GENE_A_16_P41423030 | 134 | 26 | 26 | 0.485 |
| GENE_A_16_P41428798 | 141 | 27 | 27 | 0.510 |
| GENE_A_16_P58288358 | 146 | 21 | 21 | 0.528 |
| GENE_A_16_P34804819 | 150 | 31 | 32 | 0.542 |
| GENE_A_16_P21234238 | 127 | 18 | 18 | 0.459 |
| GENE_A_16_P03591207 | 165 | 29 | 29 | 0.596 |
| GENE_A_16_P21221017 | 151 | 25 | 27 | 0.545 |
| GENE_A_16_P03571968 | 151 | 32 | 33 | 0.545 |
| GENE_A_16_P58308293 | 157 | 28 | 29 | 0.565 |
| GENE_A_16_P41438267 | 142 | 27 | 27 | 0.511 |
| GENE_A_16_P21251288 | 157 | 23 | 23 | 0.565 |
| GENE_A_16_P21224797 | 145 | 29 | 30 | 0.522 |
| GENE_A_18_P22557682 | 173 | 33 | 33 | 0.622 |
| GENE_A_16_P21233227 | 150 | 24 | 24 | 0.539 |
| GENE_A_16_P41427057 | 174 | 32 | 32 | 0.626 |
| GENE_A_18_P13906913 | 154 | 28 | 28 | 0.554 |
| GENE_A_16_P58295063 | 158 | 28 | 28 | 0.568 |
| GENE_A_16_P58260977 | 157 | 33 | 33 | 0.564 |
| GENE_A_16_P21234093 | 151 | 30 | 30 | 0.542 |
| GENE_A_16_P21207377 | 150 | 31 | 31 | 0.539 |
| GENE_A_16_P21203979 | 153 | 31 | 31 | 0.549 |
| GENE_A_18_P13947240 | 159 | 28 | 29 | 0.571 |
| GENE_A_16_P03579518 | 137 | 24 | 25 | 0.492 |
| GENE_A_18_P13889715 | 164 | 32 | 32 | 0.588 |
| GENE_A_16_P03581410 | 148 | 26 | 26 | 0.531 |
| GENE_A_16_P03592864 | 146 | 23 | 23 | 0.523 |
| GENE_A_16_P21199043 | 146 | 25 | 25 | 0.523 |
| GENE_A_16_P58297586 | 171 | 30 | 30 | 0.612 |
| GENE_A_16_P58275255 | 142 | 29 | 32 | 0.508 |
| GENE_A_16_P03585341 | 140 | 27 | 27 | 0.501 |
| GENE_A_16_P58271391 | 149 | 28 | 29 | 0.533 |
| GENE_A_16_P21205413 | 151 | 28 | 28 | 0.540 |
| GENE_A_16_P58307034 | 157 | 28 | 28 | 0.561 |
| GENE_A_16_P41415981 | 150 | 23 | 23 | 0.536 |
| GENE_A_16_P58305622 | 157 | 31 | 32 | 0.561 |
| GENE_A_18_P13932574 | 140 | 22 | 22 | 0.500 |

|                     |     |    |    |       |
|---------------------|-----|----|----|-------|
| GENE_A_16_P41413845 | 156 | 31 | 31 | 0.557 |
| GENE_A_18_P13920798 | 152 | 29 | 30 | 0.543 |
| GENE_A_16_P58300062 | 158 | 26 | 26 | 0.564 |
| GENE_A_16_P21230800 | 126 | 24 | 24 | 0.450 |
| GENE_A_16_P41455098 | 149 | 26 | 26 | 0.532 |
| GENE_A_16_P58305378 | 155 | 26 | 27 | 0.553 |
| GENE_A_16_P58267626 | 153 | 31 | 31 | 0.545 |
| GENE_A_16_P41392054 | 150 | 25 | 25 | 0.534 |
| GENE_A_16_P21206380 | 165 | 34 | 34 | 0.587 |
| GENE_A_16_P41442171 | 144 | 28 | 28 | 0.512 |
| GENE_A_16_P21202152 | 139 | 26 | 26 | 0.495 |
| GENE_A_16_P21203933 | 144 | 27 | 27 | 0.512 |
| GENE_A_16_P03551565 | 145 | 29 | 29 | 0.515 |
| GENE_A_18_P13930293 | 139 | 21 | 21 | 0.494 |
| GENE_A_16_P41429513 | 160 | 27 | 27 | 0.568 |
| GENE_A_16_P21261686 | 146 | 28 | 28 | 0.518 |
| GENE_A_16_P21194324 | 176 | 28 | 28 | 0.624 |
| GENE_A_16_P21270985 | 123 | 21 | 21 | 0.436 |
| GENE_A_16_P58305602 | 164 | 25 | 26 | 0.582 |
| GENE_A_16_P03578655 | 162 | 30 | 30 | 0.574 |
| GENE_A_16_P03588823 | 158 | 27 | 27 | 0.560 |
| GENE_A_16_P58281478 | 161 | 31 | 31 | 0.570 |
| GENE_A_16_P58269192 | 143 | 31 | 31 | 0.506 |
| GENE_A_16_P58262432 | 136 | 26 | 26 | 0.481 |
| GENE_A_16_P03575580 | 147 | 25 | 26 | 0.520 |
| GENE_A_16_P41451553 | 140 | 24 | 24 | 0.495 |
| GENE_A_16_P21248222 | 159 | 29 | 29 | 0.562 |
| GENE_A_16_P21211034 | 136 | 22 | 23 | 0.480 |
| GENE_A_18_P13902826 | 157 | 30 | 30 | 0.554 |
| GENE_A_18_P13909687 | 126 | 24 | 24 | 0.445 |
| GENE_A_18_P13884878 | 158 | 29 | 29 | 0.558 |
| GENE_A_16_P21233549 | 151 | 26 | 26 | 0.532 |
| GENE_A_16_P58278122 | 146 | 22 | 25 | 0.515 |
| GENE_A_16_P58295196 | 149 | 27 | 27 | 0.525 |
| GENE_A_16_P41443736 | 144 | 31 | 31 | 0.508 |
| GENE_A_18_P13899982 | 135 | 24 | 24 | 0.476 |
| GENE_A_16_P03556197 | 135 | 22 | 22 | 0.475 |
| GENE_A_16_P21222737 | 148 | 27 | 28 | 0.520 |
| GENE_A_16_P58274180 | 161 | 29 | 29 | 0.565 |
| GENE_A_18_P13914406 | 153 | 29 | 29 | 0.537 |
| GENE_A_16_P21192804 | 143 | 31 | 31 | 0.502 |
| GENE_A_16_P58271532 | 157 | 20 | 20 | 0.551 |
| GENE_A_16_P41415407 | 136 | 21 | 21 | 0.477 |
| GENE_A_16_P58291141 | 146 | 27 | 27 | 0.512 |
| GENE_A_16_P58298052 | 169 | 24 | 24 | 0.593 |
| GENE_A_16_P58262451 | 140 | 31 | 31 | 0.491 |

|                     |     |    |    |       |
|---------------------|-----|----|----|-------|
| GENE_A_16_P41408104 | 147 | 20 | 22 | 0.515 |
| GENE_A_16_P58281323 | 168 | 31 | 31 | 0.588 |
| GENE_A_16_P58275669 | 150 | 25 | 25 | 0.525 |
| GENE_A_16_P41437313 | 160 | 27 | 27 | 0.559 |
| GENE_A_16_P41444561 | 148 | 27 | 27 | 0.517 |
| GENE_A_16_P41442297 | 149 | 28 | 28 | 0.520 |
| GENE_A_16_P21208999 | 155 | 30 | 30 | 0.541 |
| GENE_A_16_P41406347 | 138 | 21 | 21 | 0.482 |
| GENE_A_14_P133284   | 140 | 19 | 19 | 0.489 |
| GENE_A_16_P58302827 | 171 | 29 | 29 | 0.596 |
| GENE_A_16_P03589678 | 130 | 22 | 23 | 0.453 |
| GENE_A_16_P03582759 | 168 | 28 | 29 | 0.586 |
| GENE_A_16_P41457187 | 147 | 23 | 23 | 0.512 |
| GENE_A_16_P21209379 | 180 | 38 | 38 | 0.627 |
| GENE_A_16_P21202642 | 146 | 27 | 27 | 0.508 |
| GENE_A_16_P03592593 | 150 | 24 | 24 | 0.522 |
| GENE_A_16_P41422035 | 164 | 26 | 26 | 0.571 |
| GENE_A_16_P21200243 | 161 | 32 | 33 | 0.560 |
| GENE_A_16_P41416367 | 165 | 30 | 30 | 0.574 |
| GENE_A_16_P21210967 | 161 | 31 | 31 | 0.560 |
| GENE_A_16_P58260743 | 146 | 26 | 27 | 0.508 |
| GENE_A_16_P21197945 | 168 | 25 | 25 | 0.584 |
| GENE_A_16_P03577015 | 147 | 23 | 23 | 0.511 |
| GENE_A_16_P03592252 | 123 | 23 | 23 | 0.427 |
| GENE_A_16_P58283988 | 155 | 28 | 28 | 0.538 |
| GENE_A_16_P58299827 | 126 | 25 | 25 | 0.437 |
| GENE_A_16_P03596593 | 148 | 26 | 27 | 0.513 |
| GENE_A_16_P21220122 | 158 | 31 | 31 | 0.548 |
| GENE_A_16_P03552541 | 178 | 31 | 31 | 0.617 |
| GENE_A_16_P03550652 | 159 | 27 | 28 | 0.551 |
| GENE_A_16_P21259740 | 141 | 17 | 17 | 0.489 |
| GENE_A_14_P137127   | 142 | 25 | 27 | 0.492 |
| GENE_A_16_P41389416 | 166 | 28 | 28 | 0.575 |
| GENE_A_16_P21229247 | 138 | 25 | 25 | 0.477 |
| GENE_A_16_P21209876 | 142 | 21 | 21 | 0.491 |
| GENE_A_16_P21212306 | 152 | 25 | 27 | 0.526 |
| GENE_A_16_P58279518 | 142 | 26 | 26 | 0.491 |
| GENE_A_16_P58298665 | 150 | 27 | 27 | 0.518 |
| GENE_A_16_P41425139 | 140 | 30 | 30 | 0.484 |
| GENE_A_16_P21209414 | 167 | 34 | 34 | 0.577 |
| GENE_A_16_P03562133 | 134 | 21 | 21 | 0.463 |
| GENE_A_16_P21231031 | 153 | 19 | 19 | 0.529 |
| GENE_A_16_P21255991 | 144 | 24 | 24 | 0.498 |
| GENE_A_16_P41391458 | 140 | 24 | 24 | 0.483 |
| GENE_A_18_P13870052 | 148 | 27 | 27 | 0.511 |
| GENE_A_18_P13891424 | 157 | 33 | 33 | 0.542 |

|                     |     |    |    |       |
|---------------------|-----|----|----|-------|
| GENE_A_16_P41446979 | 163 | 27 | 27 | 0.563 |
| GENE_A_16_P21227313 | 145 | 24 | 25 | 0.500 |
| GENE_A_16_P58287593 | 134 | 23 | 23 | 0.462 |
| GENE_A_16_P41411065 | 170 | 33 | 34 | 0.586 |
| GENE_A_16_P21223162 | 136 | 20 | 21 | 0.469 |
| GENE_A_16_P58266645 | 163 | 31 | 31 | 0.562 |
| GENE_A_16_P41468222 | 154 | 25 | 25 | 0.530 |
| GENE_A_16_P21233329 | 166 | 30 | 30 | 0.571 |
| GENE_A_16_P58267193 | 135 | 25 | 26 | 0.464 |
| GENE_A_18_P22488092 | 142 | 27 | 29 | 0.488 |
| GENE_A_16_P41416371 | 161 | 35 | 36 | 0.553 |
| GENE_A_16_P03582115 | 150 | 28 | 28 | 0.515 |
| GENE_A_16_P58293363 | 165 | 28 | 28 | 0.567 |
| GENE_A_16_P03593015 | 154 | 26 | 26 | 0.529 |
| GENE_A_16_P34767649 | 137 | 21 | 21 | 0.470 |
| GENE_A_16_P58271076 | 142 | 23 | 23 | 0.488 |
| GENE_A_18_P13884121 | 137 | 21 | 21 | 0.470 |
| GENE_A_16_P58287650 | 151 | 28 | 28 | 0.518 |
| GENE_A_18_P13857750 | 144 | 22 | 22 | 0.494 |
| GENE_A_16_P58264294 | 138 | 23 | 23 | 0.473 |
| GENE_A_16_P58284729 | 117 | 21 | 21 | 0.401 |
| GENE_A_16_P03596757 | 159 | 28 | 28 | 0.545 |
| GENE_A_18_P22574579 | 144 | 27 | 27 | 0.494 |
| GENE_A_18_P13936279 | 144 | 29 | 29 | 0.493 |
| GENE_A_18_P13873178 | 135 | 22 | 22 | 0.462 |
| GENE_A_16_P03553016 | 156 | 31 | 31 | 0.534 |
| GENE_A_16_P03592685 | 132 | 20 | 20 | 0.452 |
| GENE_A_16_P58271292 | 141 | 29 | 29 | 0.483 |
| GENE_A_16_P58284985 | 159 | 26 | 27 | 0.544 |
| GENE_A_16_P03592134 | 156 | 26 | 26 | 0.533 |
| GENE_A_16_P21210783 | 148 | 28 | 29 | 0.506 |
| GENE_A_16_P21257332 | 155 | 25 | 25 | 0.530 |
| GENE_A_16_P58274209 | 148 | 22 | 22 | 0.505 |
| GENE_A_16_P21214936 | 174 | 28 | 29 | 0.594 |
| GENE_A_16_P21201252 | 145 | 21 | 21 | 0.495 |
| GENE_A_16_P58299453 | 137 | 23 | 23 | 0.468 |
| GENE_A_18_P22585659 | 150 | 24 | 24 | 0.512 |
| GENE_A_16_P58306891 | 158 | 29 | 29 | 0.539 |
| GENE_A_16_P21240719 | 172 | 38 | 38 | 0.587 |
| GENE_A_16_P03587932 | 164 | 32 | 32 | 0.559 |
| GENE_A_16_P21208026 | 154 | 25 | 25 | 0.525 |
| GENE_A_16_P58300945 | 136 | 22 | 22 | 0.464 |
| GENE_A_16_P58296454 | 138 | 26 | 26 | 0.470 |
| GENE_A_16_P21220463 | 154 | 28 | 29 | 0.525 |
| GENE_A_16_P03582496 | 151 | 22 | 22 | 0.514 |
| GENE_A_16_P58260082 | 151 | 27 | 28 | 0.514 |

|                     |     |    |    |       |
|---------------------|-----|----|----|-------|
| GENE_A_18_P13942945 | 149 | 27 | 27 | 0.507 |
| GENE_A_16_P58289437 | 147 | 25 | 25 | 0.500 |
| GENE_A_18_P22569928 | 139 | 21 | 21 | 0.473 |
| GENE_A_16_P41393696 | 130 | 22 | 22 | 0.442 |
| GENE_A_16_P41435283 | 161 | 32 | 32 | 0.548 |
| GENE_A_16_P58275429 | 154 | 25 | 26 | 0.524 |
| GENE_A_16_P03582837 | 145 | 24 | 24 | 0.493 |
| GENE_A_18_P13876104 | 132 | 20 | 20 | 0.449 |
| GENE_A_16_P58268180 | 138 | 25 | 25 | 0.469 |
| GENE_A_16_P58262325 | 135 | 20 | 20 | 0.458 |
| GENE_A_16_P58289234 | 165 | 28 | 28 | 0.560 |
| GENE_A_18_P22599316 | 160 | 23 | 23 | 0.543 |
| GENE_A_16_P58302748 | 159 | 21 | 21 | 0.539 |
| GENE_A_16_P03597446 | 144 | 25 | 25 | 0.488 |
| GENE_A_16_P58264037 | 143 | 24 | 25 | 0.485 |
| GENE_A_18_P13876639 | 163 | 20 | 20 | 0.553 |
| GENE_A_16_P58305764 | 154 | 28 | 28 | 0.521 |
| GENE_A_16_P58304003 | 139 | 25 | 25 | 0.470 |
| GENE_A_16_P58293144 | 143 | 22 | 22 | 0.484 |
| GENE_A_16_P21198989 | 170 | 31 | 31 | 0.575 |
| GENE_A_18_P13864065 | 141 | 19 | 21 | 0.476 |
| GENE_A_16_P03552494 | 152 | 27 | 27 | 0.514 |
| GENE_A_18_P13938788 | 147 | 25 | 25 | 0.496 |
| GENE_A_16_P58296129 | 156 | 27 | 27 | 0.527 |
| GENE_A_16_P21198675 | 161 | 26 | 28 | 0.544 |
| GENE_A_16_P03594778 | 131 | 22 | 22 | 0.442 |
| GENE_A_16_P03592817 | 143 | 30 | 31 | 0.482 |
| GENE_A_16_P41423478 | 153 | 25 | 26 | 0.516 |
| GENE_A_16_P03575216 | 136 | 22 | 22 | 0.459 |
| GENE_A_16_P03572018 | 145 | 26 | 26 | 0.489 |
| GENE_A_16_P58261934 | 140 | 26 | 26 | 0.472 |
| GENE_A_16_P58298037 | 169 | 27 | 27 | 0.570 |
| GENE_A_16_P03591062 | 149 | 25 | 25 | 0.502 |
| GENE_A_18_P13925319 | 140 | 18 | 18 | 0.472 |
| GENE_A_16_P21224351 | 133 | 24 | 24 | 0.448 |
| GENE_A_16_P41393825 | 142 | 24 | 24 | 0.478 |
| GENE_A_18_P13866759 | 156 | 24 | 24 | 0.525 |
| GENE_A_16_P58290636 | 175 | 23 | 23 | 0.589 |
| GENE_A_16_P21199342 | 150 | 26 | 26 | 0.505 |
| GENE_A_16_P21235319 | 153 | 29 | 29 | 0.515 |
| GENE_A_16_P58279643 | 155 | 21 | 22 | 0.521 |
| GENE_A_16_P21251691 | 159 | 23 | 23 | 0.535 |
| GENE_A_16_P34772513 | 137 | 22 | 22 | 0.461 |
| GENE_A_16_P03559559 | 146 | 29 | 29 | 0.491 |
| GENE_A_16_P21194373 | 159 | 25 | 25 | 0.534 |
| GENE_A_16_P03556521 | 149 | 27 | 27 | 0.501 |

|                     |     |    |    |       |
|---------------------|-----|----|----|-------|
| GENE_A_18_P13905044 | 142 | 25 | 25 | 0.477 |
| GENE_A_16_P21213518 | 162 | 27 | 27 | 0.544 |
| GENE_A_16_P21246440 | 147 | 25 | 25 | 0.493 |
| GENE_A_16_P58286262 | 155 | 27 | 28 | 0.520 |
| GENE_A_16_P41425993 | 133 | 21 | 21 | 0.446 |
| GENE_A_16_P58283387 | 150 | 24 | 24 | 0.503 |
| GENE_A_16_P58280326 | 153 | 30 | 30 | 0.513 |
| GENE_A_16_P58277554 | 165 | 27 | 28 | 0.553 |
| GENE_A_16_P21206744 | 150 | 27 | 27 | 0.503 |
| GENE_A_16_P21221242 | 132 | 24 | 24 | 0.442 |
| GENE_A_16_P41466933 | 156 | 24 | 24 | 0.523 |
| GENE_A_16_P21239005 | 161 | 27 | 27 | 0.539 |
| GENE_A_16_P21223901 | 153 | 22 | 22 | 0.512 |
| GENE_A_16_P03580035 | 149 | 23 | 23 | 0.498 |
| GENE_A_16_P58306418 | 177 | 31 | 31 | 0.591 |
| GENE_A_18_P13908923 | 133 | 24 | 24 | 0.444 |
| GENE_A_18_P13887260 | 130 | 21 | 21 | 0.434 |
| GENE_A_18_P22551754 | 148 | 24 | 24 | 0.494 |
| GENE_A_16_P58270151 | 151 | 25 | 26 | 0.504 |
| GENE_A_16_P03567429 | 141 | 21 | 21 | 0.470 |
| GENE_A_18_P13915572 | 135 | 19 | 19 | 0.450 |
| GENE_A_16_P21252937 | 138 | 24 | 24 | 0.460 |
| GENE_A_16_P58278426 | 137 | 24 | 24 | 0.456 |
| GENE_A_16_P41414181 | 156 | 27 | 27 | 0.520 |
| GENE_A_16_P58263525 | 164 | 24 | 24 | 0.546 |
| GENE_A_16_P21268289 | 158 | 27 | 27 | 0.526 |
| GENE_A_18_P13898702 | 159 | 26 | 26 | 0.529 |
| GENE_A_18_P13925082 | 147 | 32 | 32 | 0.489 |
| GENE_A_18_P13899935 | 141 | 26 | 26 | 0.469 |
| GENE_A_16_P21255471 | 167 | 32 | 33 | 0.555 |
| GENE_A_16_P34774137 | 130 | 24 | 24 | 0.432 |
| GENE_A_18_P22528457 | 142 | 23 | 24 | 0.472 |
| GENE_A_16_P58291591 | 163 | 30 | 30 | 0.541 |
| GENE_A_16_P58260592 | 146 | 25 | 26 | 0.485 |
| GENE_A_16_P21208712 | 152 | 24 | 24 | 0.504 |
| GENE_A_16_P21262792 | 147 | 22 | 22 | 0.488 |
| GENE_A_16_P41406657 | 160 | 31 | 32 | 0.531 |
| GENE_A_16_P41427222 | 161 | 29 | 29 | 0.534 |
| GENE_A_16_P58300928 | 153 | 29 | 29 | 0.507 |
| GENE_A_18_P13874230 | 153 | 27 | 28 | 0.507 |
| GENE_A_16_P21239137 | 162 | 26 | 26 | 0.536 |
| GENE_A_18_P13856062 | 147 | 27 | 28 | 0.487 |
| GENE_A_16_P58270530 | 151 | 21 | 21 | 0.500 |
| GENE_A_16_P21192749 | 164 | 30 | 31 | 0.543 |
| GENE_A_16_P21270771 | 143 | 30 | 31 | 0.473 |
| GENE_A_16_P58294164 | 139 | 26 | 26 | 0.460 |



|                     |     |    |    |       |
|---------------------|-----|----|----|-------|
| GENE_A_16_P41407766 | 142 | 23 | 23 | 0.470 |
| GENE_A_18_P22596174 | 135 | 26 | 26 | 0.446 |
| GENE_A_16_P41439167 | 144 | 21 | 21 | 0.476 |
| GENE_A_16_P21196607 | 170 | 29 | 29 | 0.561 |
| GENE_A_16_P21244157 | 135 | 25 | 25 | 0.446 |
| GENE_A_16_P03585696 | 145 | 28 | 28 | 0.479 |
| GENE_A_16_P21255876 | 142 | 15 | 15 | 0.468 |
| GENE_A_16_P21215884 | 164 | 27 | 27 | 0.541 |
| GENE_A_18_P22499941 | 161 | 28 | 28 | 0.531 |
| GENE_A_16_P03597218 | 151 | 25 | 25 | 0.498 |
| GENE_A_16_P03577618 | 164 | 29 | 29 | 0.541 |
| GENE_A_16_P03579906 | 156 | 23 | 23 | 0.514 |
| GENE_A_16_P03593190 | 159 | 30 | 30 | 0.524 |
| GENE_A_16_P58304924 | 160 | 28 | 28 | 0.527 |
| GENE_A_16_P21229245 | 163 | 28 | 28 | 0.537 |
| GENE_A_16_P21202292 | 140 | 18 | 18 | 0.461 |
| GENE_A_16_P21217905 | 128 | 18 | 18 | 0.421 |
| GENE_A_18_P13868336 | 134 | 23 | 24 | 0.441 |
| GENE_A_16_P41437039 | 133 | 22 | 22 | 0.437 |
| GENE_A_16_P58273080 | 125 | 21 | 21 | 0.411 |
| GENE_A_18_P13916933 | 148 | 26 | 27 | 0.486 |
| GENE_A_16_P03561027 | 145 | 26 | 27 | 0.477 |
| GENE_A_16_P21223918 | 127 | 18 | 18 | 0.417 |
| GENE_A_16_P21193807 | 127 | 25 | 26 | 0.417 |
| GENE_A_16_P41428096 | 171 | 27 | 27 | 0.561 |
| GENE_A_16_P03572780 | 150 | 24 | 24 | 0.492 |
| GENE_A_18_P13858284 | 142 | 21 | 21 | 0.466 |
| GENE_A_16_P58308123 | 139 | 26 | 26 | 0.456 |
| GENE_A_16_P58309375 | 137 | 22 | 22 | 0.449 |
| GENE_A_16_P03586675 | 144 | 29 | 29 | 0.472 |
| GENE_A_16_P03583254 | 135 | 23 | 23 | 0.443 |
| GENE_A_16_P03581527 | 154 | 24 | 24 | 0.505 |
| GENE_A_16_P21215048 | 173 | 28 | 28 | 0.567 |
| GENE_A_16_P58304912 | 172 | 28 | 28 | 0.563 |
| GENE_A_16_P21224067 | 128 | 22 | 22 | 0.419 |
| GENE_A_16_P58309247 | 157 | 25 | 25 | 0.514 |
| GENE_A_16_P58294692 | 139 | 22 | 22 | 0.454 |
| GENE_A_16_P21215087 | 155 | 28 | 28 | 0.506 |
| GENE_A_16_P58296535 | 125 | 21 | 21 | 0.408 |
| GENE_A_18_P22598081 | 166 | 26 | 26 | 0.542 |
| GENE_A_16_P03583446 | 151 | 25 | 25 | 0.493 |
| GENE_A_16_P21240233 | 165 | 34 | 34 | 0.538 |
| GENE_A_16_P21196824 | 146 | 24 | 24 | 0.476 |
| GENE_A_16_P58279667 | 154 | 24 | 24 | 0.502 |
| GENE_A_18_P13938584 | 145 | 23 | 23 | 0.473 |
| GENE_A_16_P21220627 | 135 | 23 | 23 | 0.440 |

|                     |     |    |    |       |
|---------------------|-----|----|----|-------|
| GENE_A_18_P13908810 | 136 | 27 | 27 | 0.444 |
| GENE_A_16_P58292688 | 153 | 29 | 29 | 0.499 |
| GENE_A_16_P58261920 | 165 | 23 | 23 | 0.538 |
| GENE_A_16_P03580259 | 155 | 25 | 25 | 0.505 |
| GENE_A_18_P13890905 | 141 | 21 | 22 | 0.460 |
| GENE_A_16_P58261261 | 153 | 18 | 18 | 0.498 |
| GENE_A_18_P13879535 | 158 | 23 | 23 | 0.514 |
| GENE_A_16_P03569065 | 155 | 19 | 19 | 0.505 |
| GENE_A_16_P58267612 | 152 | 28 | 28 | 0.495 |
| GENE_A_16_P58269140 | 169 | 24 | 24 | 0.550 |
| GENE_A_16_P21198317 | 164 | 32 | 32 | 0.533 |
| GENE_A_16_P21198343 | 135 | 22 | 22 | 0.439 |
| GENE_A_16_P03580543 | 143 | 22 | 23 | 0.465 |
| GENE_A_16_P41441291 | 166 | 23 | 23 | 0.540 |
| GENE_A_16_P21199022 | 159 | 27 | 27 | 0.517 |
| GENE_A_16_P21251912 | 145 | 22 | 22 | 0.471 |
| GENE_A_18_P13895795 | 145 | 26 | 26 | 0.471 |
| GENE_A_16_P58288474 | 157 | 26 | 26 | 0.510 |
| GENE_A_16_P21223443 | 150 | 21 | 21 | 0.487 |
| GENE_A_16_P41452059 | 138 | 22 | 22 | 0.448 |
| GENE_A_16_P41433352 | 152 | 25 | 25 | 0.493 |
| GENE_A_16_P03590277 | 157 | 34 | 34 | 0.510 |
| GENE_A_16_P41404210 | 159 | 26 | 26 | 0.515 |
| GENE_A_16_P41409163 | 157 | 25 | 25 | 0.509 |
| GENE_A_16_P21202014 | 119 | 19 | 20 | 0.385 |
| GENE_A_18_P13923334 | 178 | 27 | 27 | 0.576 |
| GENE_A_16_P21210136 | 150 | 24 | 24 | 0.486 |
| GENE_A_16_P34810023 | 140 | 22 | 22 | 0.453 |
| GENE_A_16_P03577644 | 139 | 23 | 23 | 0.450 |
| GENE_A_16_P58293847 | 150 | 24 | 25 | 0.485 |
| GENE_A_16_P58293094 | 156 | 28 | 28 | 0.505 |
| GENE_A_16_P21244663 | 161 | 27 | 28 | 0.521 |
| GENE_A_16_P58292081 | 156 | 29 | 30 | 0.504 |
| GENE_A_16_P03565395 | 148 | 24 | 25 | 0.478 |
| GENE_A_16_P41398800 | 154 | 25 | 26 | 0.498 |
| GENE_A_16_P21210001 | 179 | 24 | 24 | 0.578 |
| GENE_A_16_P41413338 | 172 | 32 | 32 | 0.556 |
| GENE_A_18_P22542396 | 154 | 26 | 27 | 0.497 |
| GENE_A_16_P03566562 | 157 | 26 | 26 | 0.507 |
| GENE_A_16_P21252635 | 147 | 23 | 23 | 0.474 |
| GENE_A_16_P58269324 | 160 | 27 | 27 | 0.516 |
| GENE_A_18_P22547761 | 144 | 23 | 25 | 0.464 |
| GENE_A_16_P21205679 | 138 | 24 | 24 | 0.445 |
| GENE_A_16_P58307282 | 158 | 25 | 25 | 0.509 |
| GENE_A_16_P58295610 | 159 | 25 | 25 | 0.512 |
| GENE_A_16_P03558501 | 143 | 23 | 23 | 0.460 |

|                     |     |    |    |       |
|---------------------|-----|----|----|-------|
| GENE_A_16_P58296419 | 137 | 23 | 23 | 0.440 |
| GENE_A_16_P58284589 | 127 | 21 | 21 | 0.408 |
| GENE_A_16_P03570574 | 113 | 18 | 18 | 0.363 |
| GENE_A_16_P58261844 | 154 | 22 | 22 | 0.494 |
| GENE_A_18_P13881524 | 154 | 27 | 27 | 0.494 |
| GENE_A_16_P03557568 | 149 | 22 | 23 | 0.478 |
| GENE_A_18_P13927162 | 149 | 24 | 25 | 0.477 |
| GENE_A_16_P58299315 | 143 | 22 | 22 | 0.458 |
| GENE_A_18_P13913921 | 160 | 23 | 23 | 0.512 |
| GENE_A_16_P58282736 | 167 | 24 | 25 | 0.534 |
| GENE_A_18_P13912518 | 168 | 33 | 33 | 0.537 |
| GENE_A_16_P21202023 | 161 | 26 | 26 | 0.515 |
| GENE_A_16_P03586887 | 158 | 25 | 25 | 0.505 |
| GENE_A_16_P58286190 | 146 | 22 | 22 | 0.466 |
| GENE_A_16_P03576283 | 158 | 31 | 31 | 0.505 |
| GENE_A_16_P03595852 | 181 | 28 | 28 | 0.578 |
| GENE_A_16_P21231723 | 151 | 27 | 27 | 0.482 |
| GENE_A_16_P58264804 | 143 | 20 | 21 | 0.456 |
| GENE_A_16_P58265523 | 151 | 29 | 29 | 0.482 |
| GENE_A_16_P21262183 | 139 | 20 | 20 | 0.443 |
| GENE_A_16_P21268805 | 164 | 28 | 28 | 0.523 |
| GENE_A_16_P58278379 | 137 | 21 | 22 | 0.437 |
| GENE_A_16_P58286110 | 142 | 22 | 22 | 0.453 |
| GENE_A_16_P58278259 | 155 | 26 | 26 | 0.494 |
| GENE_A_16_P21206264 | 170 | 24 | 24 | 0.541 |
| GENE_A_16_P58275375 | 147 | 26 | 26 | 0.468 |
| GENE_A_16_P58273811 | 155 | 25 | 26 | 0.494 |
| GENE_A_16_P03586147 | 157 | 19 | 19 | 0.500 |
| GENE_A_16_P03594037 | 161 | 23 | 23 | 0.512 |
| GENE_A_18_P22567521 | 168 | 27 | 27 | 0.535 |
| GENE_A_16_P03588885 | 163 | 27 | 27 | 0.518 |
| GENE_A_16_P58291427 | 151 | 24 | 24 | 0.480 |
| GENE_A_18_P22562193 | 155 | 32 | 32 | 0.493 |
| GENE_A_16_P21198232 | 165 | 27 | 27 | 0.524 |
| GENE_A_16_P21248558 | 159 | 25 | 25 | 0.505 |
| GENE_A_16_P21230286 | 132 | 24 | 24 | 0.419 |
| GENE_A_16_P58309507 | 143 | 26 | 26 | 0.454 |
| GENE_A_16_P21199947 | 153 | 25 | 25 | 0.485 |
| GENE_A_16_P58272450 | 141 | 23 | 23 | 0.447 |
| GENE_A_18_P22572447 | 138 | 24 | 24 | 0.438 |
| GENE_A_18_P13898073 | 140 | 24 | 24 | 0.444 |
| GENE_A_16_P41453995 | 149 | 24 | 24 | 0.472 |
| GENE_A_16_P41424462 | 130 | 26 | 26 | 0.412 |
| GENE_A_18_P13926746 | 157 | 20 | 20 | 0.497 |
| GENE_A_16_P03595772 | 157 | 26 | 26 | 0.497 |
| GENE_A_16_P21272433 | 148 | 27 | 27 | 0.468 |

|                     |     |    |    |       |
|---------------------|-----|----|----|-------|
| GENE_A_16_P21203552 | 146 | 27 | 28 | 0.461 |
| GENE_A_18_P13878037 | 143 | 22 | 22 | 0.452 |
| GENE_A_16_P03585655 | 163 | 24 | 24 | 0.515 |
| GENE_A_16_P41397302 | 161 | 30 | 30 | 0.508 |
| GENE_A_16_P21239130 | 147 | 25 | 25 | 0.464 |
| GENE_A_16_P03588331 | 155 | 25 | 25 | 0.489 |
| GENE_A_16_P21227172 | 135 | 19 | 19 | 0.426 |
| GENE_A_16_P58269220 | 158 | 27 | 27 | 0.498 |
| GENE_A_16_P58272758 | 155 | 26 | 26 | 0.488 |
| GENE_A_16_P21199853 | 130 | 20 | 20 | 0.409 |
| GENE_A_18_P13907579 | 144 | 24 | 24 | 0.453 |
| GENE_A_16_P41469248 | 143 | 23 | 23 | 0.450 |
| GENE_A_18_P13891702 | 158 | 24 | 25 | 0.497 |
| GENE_A_16_P58301206 | 165 | 22 | 22 | 0.519 |
| GENE_A_16_P03597344 | 149 | 25 | 25 | 0.469 |
| GENE_A_16_P21210703 | 158 | 26 | 26 | 0.497 |
| GENE_A_16_P21204457 | 178 | 30 | 30 | 0.559 |
| GENE_A_16_P21221633 | 167 | 25 | 25 | 0.525 |
| GENE_A_16_P03566935 | 123 | 21 | 21 | 0.386 |
| GENE_A_16_P03594485 | 157 | 19 | 19 | 0.493 |
| GENE_A_16_P03553870 | 160 | 33 | 34 | 0.502 |
| GENE_A_16_P58263801 | 160 | 25 | 25 | 0.502 |
| GENE_A_16_P41396525 | 158 | 27 | 27 | 0.495 |
| GENE_A_16_P21263786 | 159 | 25 | 27 | 0.498 |
| GENE_A_16_P21206011 | 148 | 23 | 23 | 0.464 |
| GENE_A_16_P58295843 | 159 | 31 | 31 | 0.498 |
| GENE_A_16_P21229872 | 149 | 25 | 26 | 0.467 |
| GENE_A_16_P21206103 | 148 | 22 | 22 | 0.464 |
| GENE_A_18_P22572469 | 149 | 26 | 26 | 0.467 |
| GENE_A_16_P21224567 | 169 | 27 | 28 | 0.529 |
| GENE_A_16_P03561941 | 163 | 29 | 29 | 0.510 |
| GENE_A_16_P03561928 | 166 | 30 | 30 | 0.519 |
| GENE_A_16_P41402747 | 174 | 29 | 29 | 0.544 |
| GENE_A_16_P58267790 | 174 | 26 | 26 | 0.544 |
| GENE_A_16_P21251294 | 156 | 27 | 27 | 0.488 |
| GENE_A_16_P58265877 | 160 | 22 | 22 | 0.500 |
| GENE_A_16_P58289771 | 140 | 18 | 18 | 0.438 |
| GENE_A_16_P58306237 | 156 | 21 | 21 | 0.488 |
| GENE_A_16_P58298402 | 140 | 23 | 24 | 0.437 |
| GENE_A_16_P21261709 | 154 | 20 | 20 | 0.481 |
| GENE_A_18_P13894741 | 139 | 21 | 21 | 0.434 |
| GENE_A_18_P13941274 | 159 | 24 | 24 | 0.496 |
| GENE_A_18_P13907481 | 148 | 21 | 22 | 0.462 |
| GENE_A_16_P21234463 | 148 | 24 | 25 | 0.462 |
| GENE_A_16_P03558043 | 149 | 26 | 26 | 0.465 |
| GENE_A_16_P21222413 | 149 | 21 | 21 | 0.465 |

|                     |     |    |    |       |
|---------------------|-----|----|----|-------|
| GENE_A_16_P21244806 | 157 | 24 | 24 | 0.489 |
| GENE_A_18_P13933964 | 160 | 26 | 26 | 0.499 |
| GENE_A_16_P41400538 | 141 | 18 | 18 | 0.439 |
| GENE_A_16_P41403655 | 149 | 25 | 25 | 0.463 |
| GENE_A_16_P03568981 | 127 | 20 | 20 | 0.395 |
| GENE_A_16_P41415935 | 171 | 25 | 25 | 0.532 |
| GENE_A_16_P21233617 | 147 | 24 | 24 | 0.457 |
| GENE_A_16_P21230169 | 132 | 21 | 22 | 0.410 |
| GENE_A_16_P41458780 | 153 | 28 | 28 | 0.475 |
| GENE_A_16_P41435050 | 134 | 19 | 19 | 0.416 |
| GENE_A_16_P41427069 | 160 | 24 | 24 | 0.496 |
| GENE_A_16_P03565790 | 133 | 23 | 23 | 0.412 |
| GENE_A_16_P58274954 | 137 | 21 | 21 | 0.425 |
| GENE_A_16_P03581783 | 150 | 24 | 24 | 0.465 |
| GENE_A_18_P13935793 | 160 | 24 | 24 | 0.496 |
| GENE_A_18_P22576670 | 164 | 24 | 25 | 0.508 |
| GENE_A_18_P13899347 | 121 | 17 | 18 | 0.375 |
| GENE_A_16_P21193834 | 154 | 25 | 26 | 0.477 |
| GENE_A_16_P21252168 | 159 | 24 | 25 | 0.493 |
| GENE_A_16_P41459589 | 145 | 22 | 22 | 0.449 |
| GENE_A_16_P58287967 | 138 | 21 | 21 | 0.427 |
| GENE_A_18_P13919923 | 162 | 25 | 26 | 0.502 |
| GENE_A_16_P58288385 | 141 | 25 | 25 | 0.437 |
| GENE_A_16_P21230976 | 152 | 25 | 26 | 0.471 |
| GENE_A_16_P58278002 | 143 | 23 | 23 | 0.443 |
| GENE_A_16_P03575422 | 145 | 22 | 23 | 0.449 |
| GENE_A_16_P21200049 | 147 | 24 | 24 | 0.455 |
| GENE_A_16_P03565816 | 119 | 27 | 28 | 0.368 |
| GENE_A_18_P22486534 | 167 | 34 | 34 | 0.517 |
| GENE_A_16_P58268460 | 153 | 22 | 22 | 0.473 |
| GENE_A_16_P58299506 | 145 | 26 | 26 | 0.449 |
| GENE_A_16_P03563307 | 153 | 26 | 26 | 0.473 |
| GENE_A_16_P21261654 | 127 | 18 | 18 | 0.393 |
| GENE_A_16_P21223892 | 138 | 19 | 19 | 0.426 |
| GENE_A_16_P41455148 | 138 | 22 | 22 | 0.426 |
| GENE_A_16_P58271911 | 152 | 25 | 26 | 0.470 |
| GENE_A_16_P58273220 | 132 | 22 | 22 | 0.407 |
| GENE_A_16_P03583523 | 144 | 25 | 26 | 0.444 |
| GENE_A_16_P58280914 | 153 | 23 | 23 | 0.472 |
| GENE_A_16_P21195014 | 157 | 25 | 25 | 0.484 |
| GENE_A_18_P13910711 | 139 | 23 | 23 | 0.428 |
| GENE_A_16_P21212145 | 153 | 26 | 27 | 0.471 |
| GENE_A_16_P03580109 | 133 | 16 | 16 | 0.409 |
| GENE_A_18_P13911885 | 147 | 27 | 27 | 0.452 |
| GENE_A_16_P58282452 | 146 | 23 | 23 | 0.449 |
| GENE_A_16_P03597270 | 149 | 24 | 24 | 0.458 |

|                     |     |    |    |       |
|---------------------|-----|----|----|-------|
| GENE_A_16_P41400701 | 157 | 24 | 24 | 0.483 |
| GENE_A_16_P58264117 | 157 | 24 | 24 | 0.483 |
| GENE_A_16_P03584915 | 145 | 23 | 24 | 0.445 |
| GENE_A_18_P13859369 | 171 | 27 | 27 | 0.525 |
| GENE_A_16_P03551905 | 145 | 19 | 19 | 0.445 |
| GENE_A_18_P13865723 | 137 | 19 | 20 | 0.421 |
| GENE_A_16_P03580713 | 161 | 25 | 25 | 0.494 |
| GENE_A_16_P41437807 | 153 | 25 | 25 | 0.470 |
| GENE_A_16_P58263727 | 152 | 29 | 30 | 0.466 |
| GENE_A_16_P41401709 | 139 | 20 | 20 | 0.426 |
| GENE_A_16_P58309424 | 137 | 22 | 22 | 0.420 |
| GENE_A_16_P21223908 | 154 | 20 | 20 | 0.472 |
| GENE_A_16_P03558273 | 149 | 24 | 25 | 0.456 |
| GENE_A_18_P13943866 | 141 | 24 | 24 | 0.432 |
| GENE_A_16_P41428879 | 155 | 25 | 25 | 0.475 |
| GENE_A_18_P13889048 | 177 | 24 | 24 | 0.542 |
| GENE_A_16_P58307494 | 159 | 29 | 29 | 0.487 |
| GENE_A_16_P41416533 | 154 | 26 | 26 | 0.471 |
| GENE_A_16_P58293115 | 148 | 22 | 22 | 0.453 |
| GENE_A_16_P41466226 | 141 | 22 | 22 | 0.431 |
| GENE_A_16_P41453106 | 153 | 23 | 23 | 0.468 |
| GENE_A_16_P03588138 | 174 | 31 | 31 | 0.532 |
| GENE_A_16_P41418558 | 162 | 25 | 25 | 0.495 |
| GENE_A_18_P13914365 | 139 | 19 | 20 | 0.425 |
| GENE_A_18_P22595763 | 172 | 30 | 30 | 0.526 |
| GENE_A_16_P58302687 | 162 | 25 | 26 | 0.495 |
| GENE_A_16_P58267437 | 147 | 27 | 27 | 0.449 |
| GENE_A_16_P21218462 | 132 | 21 | 21 | 0.403 |
| GENE_A_16_P58273178 | 162 | 25 | 25 | 0.495 |
| GENE_A_16_P03589021 | 135 | 20 | 21 | 0.412 |
| GENE_A_16_P21233661 | 150 | 25 | 25 | 0.458 |
| GENE_A_16_P03575720 | 145 | 23 | 24 | 0.442 |
| GENE_A_18_P13869814 | 155 | 28 | 28 | 0.473 |
| GENE_A_16_P58281105 | 147 | 21 | 21 | 0.448 |
| GENE_A_16_P21214507 | 156 | 23 | 23 | 0.476 |
| GENE_A_16_P58283396 | 154 | 27 | 27 | 0.469 |
| GENE_A_16_P21253416 | 156 | 25 | 26 | 0.475 |
| GENE_A_16_P41414600 | 154 | 22 | 22 | 0.469 |
| GENE_A_16_P03585347 | 160 | 25 | 25 | 0.487 |
| GENE_A_16_P21212577 | 164 | 28 | 28 | 0.499 |
| GENE_A_16_P21233474 | 164 | 24 | 24 | 0.499 |
| GENE_A_16_P21242570 | 166 | 16 | 16 | 0.505 |
| GENE_A_18_P13874402 | 153 | 27 | 27 | 0.465 |
| GENE_A_18_P13877361 | 163 | 29 | 29 | 0.495 |
| GENE_A_16_P41458505 | 146 | 24 | 24 | 0.443 |
| GENE_A_16_P03586674 | 163 | 23 | 23 | 0.495 |

|                     |     |    |    |       |
|---------------------|-----|----|----|-------|
| GENE_A_16_P21227570 | 154 | 21 | 21 | 0.467 |
| GENE_A_18_P22594426 | 158 | 23 | 23 | 0.479 |
| GENE_A_16_P58267300 | 149 | 19 | 19 | 0.452 |
| GENE_A_16_P03562593 | 164 | 27 | 27 | 0.497 |
| GENE_A_16_P58288994 | 153 | 21 | 21 | 0.464 |
| GENE_A_16_P41402592 | 158 | 23 | 24 | 0.479 |
| GENE_A_16_P58264769 | 160 | 25 | 25 | 0.485 |
| GENE_A_18_P13906353 | 154 | 24 | 24 | 0.466 |
| GENE_A_16_P58265436 | 132 | 22 | 22 | 0.400 |
| GENE_A_16_P21228204 | 142 | 21 | 21 | 0.430 |
| GENE_A_16_P41456031 | 152 | 25 | 25 | 0.460 |
| GENE_A_18_P13889958 | 148 | 22 | 22 | 0.448 |
| GENE_A_16_P03583674 | 155 | 25 | 25 | 0.469 |
| GENE_A_18_P13907378 | 150 | 24 | 24 | 0.454 |
| GENE_A_18_P13906089 | 171 | 29 | 29 | 0.517 |
| GENE_A_16_P21218492 | 147 | 24 | 24 | 0.444 |
| GENE_A_16_P21251099 | 153 | 26 | 26 | 0.462 |
| GENE_A_16_P21215036 | 130 | 18 | 18 | 0.393 |
| GENE_A_16_P21192956 | 128 | 16 | 16 | 0.387 |
| GENE_A_18_P22596119 | 151 | 24 | 24 | 0.456 |
| GENE_A_16_P21258142 | 151 | 24 | 24 | 0.456 |
| GENE_A_16_P41391300 | 156 | 26 | 27 | 0.471 |
| GENE_A_16_P21247461 | 148 | 14 | 14 | 0.447 |
| GENE_A_16_P41403112 | 145 | 19 | 19 | 0.437 |
| GENE_A_16_P34790005 | 135 | 19 | 19 | 0.407 |
| GENE_A_16_P03578350 | 145 | 24 | 24 | 0.437 |
| GENE_A_16_P21203642 | 155 | 22 | 22 | 0.467 |
| GENE_A_18_P22549757 | 148 | 20 | 20 | 0.446 |
| GENE_A_16_P21195218 | 142 | 23 | 24 | 0.428 |
| GENE_A_16_P21249424 | 172 | 27 | 27 | 0.518 |
| GENE_A_16_P58265781 | 167 | 24 | 24 | 0.503 |
| GENE_A_16_P58268909 | 172 | 22 | 22 | 0.518 |
| GENE_A_18_P13882790 | 139 | 22 | 22 | 0.418 |
| GENE_A_18_P13941527 | 138 | 21 | 21 | 0.415 |
| GENE_A_16_P58282497 | 148 | 24 | 24 | 0.445 |
| GENE_A_16_P41464715 | 155 | 22 | 23 | 0.466 |
| GENE_A_16_P41416129 | 165 | 26 | 26 | 0.496 |
| GENE_A_16_P41417211 | 133 | 17 | 17 | 0.400 |
| GENE_A_16_P58288407 | 132 | 20 | 20 | 0.397 |
| GENE_A_16_P03593430 | 154 | 25 | 25 | 0.463 |
| GENE_A_16_P21232888 | 147 | 21 | 22 | 0.442 |
| GENE_A_18_P13872724 | 147 | 23 | 23 | 0.442 |
| GENE_A_16_P21258057 | 163 | 22 | 22 | 0.489 |
| GENE_A_16_P58296364 | 153 | 22 | 22 | 0.459 |
| GENE_A_16_P21219431 | 165 | 31 | 31 | 0.495 |
| GENE_A_16_P21212554 | 160 | 24 | 24 | 0.480 |

|                     |     |    |    |       |
|---------------------|-----|----|----|-------|
| GENE_A_18_P13885037 | 172 | 27 | 28 | 0.515 |
| GENE_A_16_P21244103 | 146 | 22 | 22 | 0.437 |
| GENE_A_16_P58274863 | 146 | 21 | 22 | 0.437 |
| GENE_A_18_P13873408 | 154 | 25 | 25 | 0.461 |
| GENE_A_16_P58278765 | 153 | 22 | 22 | 0.458 |
| GENE_A_18_P13915838 | 138 | 16 | 16 | 0.413 |
| GENE_A_16_P21202487 | 173 | 33 | 33 | 0.517 |
| GENE_A_16_P34803463 | 144 | 18 | 19 | 0.430 |
| GENE_A_16_P03596748 | 156 | 23 | 23 | 0.466 |
| GENE_A_16_P21231512 | 148 | 21 | 22 | 0.442 |
| GENE_A_16_P21215761 | 151 | 22 | 23 | 0.451 |
| GENE_A_16_P34770226 | 191 | 27 | 27 | 0.570 |
| GENE_A_16_P03597821 | 152 | 24 | 24 | 0.454 |
| GENE_A_16_P21248733 | 167 | 23 | 23 | 0.499 |
| GENE_A_16_P03571892 | 127 | 18 | 18 | 0.379 |
| GENE_A_16_P58259872 | 125 | 21 | 22 | 0.373 |
| GENE_A_16_P21226971 | 163 | 25 | 25 | 0.486 |
| GENE_A_16_P03574478 | 177 | 26 | 26 | 0.528 |
| GENE_A_18_P13881350 | 154 | 25 | 25 | 0.459 |
| GENE_A_16_P03582844 | 147 | 20 | 20 | 0.438 |
| GENE_A_16_P58302198 | 144 | 21 | 22 | 0.429 |
| GENE_A_18_P13873849 | 174 | 29 | 29 | 0.518 |
| GENE_A_16_P21233143 | 166 | 26 | 26 | 0.494 |
| GENE_A_16_P03593299 | 116 | 14 | 14 | 0.345 |
| GENE_A_16_P21198148 | 160 | 22 | 22 | 0.476 |
| GENE_A_16_P41405679 | 142 | 22 | 22 | 0.422 |
| GENE_A_16_P58303768 | 147 | 23 | 23 | 0.437 |
| GENE_A_16_P03550677 | 153 | 32 | 33 | 0.454 |
| GENE_A_16_P03572075 | 157 | 22 | 22 | 0.466 |
| GENE_A_16_P58280151 | 157 | 24 | 24 | 0.466 |
| GENE_A_18_P22516446 | 154 | 29 | 29 | 0.457 |
| GENE_A_16_P58293753 | 137 | 20 | 21 | 0.407 |
| GENE_A_16_P21253512 | 147 | 21 | 21 | 0.436 |
| GENE_A_18_P13875766 | 164 | 27 | 28 | 0.486 |
| GENE_A_16_P03556255 | 170 | 26 | 26 | 0.504 |
| GENE_A_16_P03573338 | 164 | 27 | 28 | 0.486 |
| GENE_A_16_P41415181 | 143 | 20 | 22 | 0.424 |
| GENE_A_16_P58299690 | 151 | 23 | 23 | 0.447 |
| GENE_A_16_P41395748 | 154 | 24 | 25 | 0.456 |
| GENE_A_18_P13914347 | 140 | 26 | 26 | 0.414 |
| GENE_A_16_P41417094 | 128 | 21 | 21 | 0.379 |
| GENE_A_18_P13912914 | 144 | 21 | 21 | 0.426 |
| GENE_A_18_P13868083 | 148 | 24 | 25 | 0.438 |
| GENE_A_16_P41403349 | 149 | 22 | 22 | 0.440 |
| GENE_A_16_P58259907 | 144 | 22 | 22 | 0.425 |
| GENE_A_18_P13913617 | 161 | 24 | 25 | 0.476 |



|                     |     |    |    |       |
|---------------------|-----|----|----|-------|
| GENE_A_16_P41412876 | 139 | 24 | 24 | 0.411 |
| GENE_A_16_P21209942 | 158 | 24 | 24 | 0.467 |
| GENE_A_16_P03597517 | 169 | 21 | 23 | 0.499 |
| GENE_A_16_P58306354 | 142 | 22 | 22 | 0.419 |
| GENE_A_16_P58278674 | 147 | 23 | 24 | 0.434 |
| GENE_A_18_P13892259 | 164 | 24 | 24 | 0.484 |
| GENE_A_16_P58275945 | 163 | 29 | 29 | 0.481 |
| GENE_A_18_P22542084 | 163 | 23 | 23 | 0.480 |
| GENE_A_18_P13903329 | 139 | 19 | 19 | 0.410 |
| GENE_A_16_P58271074 | 166 | 25 | 25 | 0.489 |
| GENE_A_16_P41413560 | 152 | 21 | 21 | 0.448 |
| GENE_A_16_P58264116 | 154 | 22 | 22 | 0.454 |
| GENE_A_16_P21212704 | 141 | 19 | 19 | 0.415 |
| GENE_A_16_P41429618 | 146 | 20 | 20 | 0.430 |
| GENE_A_16_P21231649 | 137 | 20 | 20 | 0.403 |
| GENE_A_16_P03576831 | 164 | 30 | 30 | 0.482 |
| GENE_A_16_P41398583 | 165 | 21 | 21 | 0.485 |
| GENE_A_16_P58305298 | 152 | 22 | 22 | 0.447 |
| GENE_A_16_P58307995 | 139 | 19 | 19 | 0.409 |
| GENE_A_16_P03563140 | 135 | 22 | 22 | 0.397 |
| GENE_A_16_P58282710 | 150 | 23 | 23 | 0.440 |
| GENE_A_16_P21232057 | 154 | 21 | 21 | 0.452 |
| GENE_A_16_P03597455 | 157 | 24 | 24 | 0.461 |
| GENE_A_16_P21263945 | 148 | 19 | 19 | 0.434 |
| GENE_A_16_P03592440 | 134 | 24 | 24 | 0.393 |
| GENE_A_16_P41444343 | 127 | 17 | 17 | 0.372 |
| GENE_A_16_P21259048 | 146 | 19 | 19 | 0.428 |
| GENE_A_16_P03578589 | 159 | 24 | 25 | 0.466 |
| GENE_A_16_P58268015 | 177 | 29 | 29 | 0.519 |
| GENE_A_16_P03595204 | 145 | 18 | 18 | 0.425 |
| GENE_A_16_P21196796 | 161 | 25 | 25 | 0.472 |
| GENE_A_16_P03596599 | 169 | 22 | 23 | 0.495 |
| GENE_A_16_P21202708 | 156 | 23 | 24 | 0.457 |
| GENE_A_16_P58307100 | 157 | 21 | 23 | 0.460 |
| GENE_A_16_P58305655 | 135 | 20 | 20 | 0.395 |
| GENE_A_16_P21244253 | 147 | 24 | 24 | 0.430 |
| GENE_A_16_P21247895 | 160 | 28 | 29 | 0.468 |
| GENE_A_16_P41418768 | 170 | 26 | 26 | 0.497 |
| GENE_A_16_P03594879 | 156 | 19 | 19 | 0.456 |
| GENE_A_16_P41407451 | 144 | 20 | 21 | 0.421 |
| GENE_A_16_P34798412 | 139 | 23 | 23 | 0.406 |
| GENE_A_16_P03559871 | 143 | 25 | 25 | 0.418 |
| GENE_A_16_P21227535 | 153 | 24 | 24 | 0.447 |
| GENE_A_16_P58290017 | 151 | 16 | 16 | 0.441 |
| GENE_A_18_P13868415 | 132 | 21 | 21 | 0.386 |
| GENE_A_16_P58296002 | 151 | 22 | 22 | 0.441 |

|                     |     |    |    |       |
|---------------------|-----|----|----|-------|
| GENE_A_16_P58290391 | 143 | 15 | 15 | 0.418 |
| GENE_A_16_P21234323 | 148 | 23 | 23 | 0.432 |
| GENE_A_16_P58265412 | 131 | 24 | 24 | 0.382 |
| GENE_A_16_P58284763 | 146 | 20 | 20 | 0.426 |
| GENE_A_16_P41446594 | 159 | 24 | 25 | 0.463 |
| GENE_A_16_P58272780 | 145 | 20 | 20 | 0.423 |
| GENE_A_16_P03597981 | 138 | 24 | 24 | 0.402 |
| GENE_A_16_P58263848 | 159 | 26 | 26 | 0.463 |
| GENE_A_16_P03589814 | 151 | 22 | 22 | 0.439 |
| GENE_A_16_P21213891 | 142 | 16 | 16 | 0.413 |
| GENE_A_16_P58297409 | 164 | 25 | 27 | 0.477 |
| GENE_A_18_P22531294 | 173 | 26 | 26 | 0.503 |
| GENE_A_16_P41388386 | 149 | 25 | 25 | 0.433 |
| GENE_A_16_P03578557 | 161 | 26 | 26 | 0.467 |
| GENE_A_16_P21263159 | 162 | 23 | 23 | 0.470 |
| GENE_A_16_P21240842 | 133 | 19 | 20 | 0.386 |
| GENE_A_16_P58281824 | 134 | 14 | 15 | 0.389 |
| GENE_A_16_P58268145 | 152 | 24 | 24 | 0.441 |
| GENE_A_16_P21213250 | 153 | 22 | 23 | 0.444 |
| GENE_A_16_P21194031 | 135 | 22 | 23 | 0.391 |
| GENE_A_18_P13879380 | 140 | 23 | 23 | 0.405 |
| GENE_A_16_P21196795 | 149 | 22 | 22 | 0.431 |
| GENE_A_18_P13922905 | 154 | 23 | 23 | 0.446 |
| GENE_A_16_P21241883 | 154 | 26 | 26 | 0.445 |
| GENE_A_16_P21222845 | 144 | 18 | 18 | 0.417 |
| GENE_A_16_P21218172 | 159 | 22 | 22 | 0.460 |
| GENE_A_16_P41412093 | 156 | 20 | 20 | 0.451 |
| GENE_A_16_P03575272 | 166 | 25 | 26 | 0.480 |
| GENE_A_16_P03575958 | 133 | 24 | 24 | 0.384 |
| GENE_A_18_P13913824 | 141 | 23 | 23 | 0.408 |
| GENE_A_16_P58277448 | 162 | 25 | 25 | 0.468 |
| GENE_A_16_P03553224 | 141 | 20 | 20 | 0.407 |
| GENE_A_16_P03585060 | 140 | 21 | 21 | 0.404 |
| GENE_A_16_P58305107 | 164 | 25 | 25 | 0.474 |
| GENE_A_16_P21254551 | 151 | 25 | 25 | 0.436 |
| GENE_A_18_P13935671 | 162 | 24 | 24 | 0.468 |
| GENE_A_16_P21210688 | 156 | 30 | 30 | 0.450 |
| GENE_A_16_P41427483 | 166 | 25 | 25 | 0.479 |
| GENE_A_18_P13900806 | 147 | 21 | 21 | 0.424 |
| GENE_A_16_P21204725 | 137 | 21 | 22 | 0.395 |
| GENE_A_16_P03572623 | 149 | 26 | 26 | 0.429 |
| GENE_A_16_P03576630 | 141 | 23 | 23 | 0.406 |
| GENE_A_16_P58289956 | 175 | 27 | 27 | 0.504 |
| GENE_A_16_P21223635 | 152 | 19 | 20 | 0.438 |
| GENE_A_16_P21233401 | 158 | 26 | 26 | 0.455 |
| GENE_A_16_P03573802 | 161 | 28 | 28 | 0.464 |

|                     |     |    |    |       |
|---------------------|-----|----|----|-------|
| GENE_A_16_P21214053 | 148 | 24 | 24 | 0.426 |
| GENE_A_16_P21209159 | 164 | 25 | 25 | 0.472 |
| GENE_A_16_P03575882 | 178 | 25 | 25 | 0.512 |
| GENE_A_16_P03583493 | 156 | 21 | 21 | 0.449 |
| GENE_A_16_P58285498 | 151 | 25 | 25 | 0.435 |
| GENE_A_16_P03586984 | 146 | 20 | 23 | 0.420 |
| GENE_A_16_P03565869 | 154 | 21 | 21 | 0.443 |
| GENE_A_16_P21200210 | 138 | 20 | 20 | 0.397 |
| GENE_A_16_P21203178 | 155 | 30 | 30 | 0.446 |
| GENE_A_16_P21193997 | 154 | 26 | 26 | 0.443 |
| GENE_A_16_P21197349 | 171 | 25 | 26 | 0.491 |
| GENE_A_16_P58261722 | 173 | 28 | 28 | 0.497 |
| GENE_A_16_P41437663 | 149 | 24 | 24 | 0.428 |
| GENE_A_16_P03551984 | 171 | 24 | 24 | 0.491 |
| GENE_A_16_P21222535 | 159 | 28 | 28 | 0.455 |
| GENE_A_16_P21242419 | 137 | 20 | 20 | 0.392 |
| GENE_A_18_P13943903 | 153 | 23 | 23 | 0.438 |
| GENE_A_16_P21228458 | 165 | 21 | 21 | 0.472 |
| GENE_A_16_P03571975 | 137 | 20 | 21 | 0.392 |
| GENE_A_16_P21194292 | 156 | 24 | 24 | 0.446 |
| GENE_A_16_P21219671 | 165 | 25 | 25 | 0.472 |
| GENE_A_18_P22560387 | 165 | 22 | 22 | 0.472 |
| GENE_A_18_P13889364 | 150 | 25 | 25 | 0.429 |
| GENE_A_16_P03583770 | 152 | 23 | 23 | 0.435 |
| GENE_A_16_P03592550 | 147 | 21 | 21 | 0.420 |
| GENE_A_16_P58285180 | 129 | 21 | 21 | 0.369 |
| GENE_A_16_P58263988 | 160 | 23 | 23 | 0.457 |
| GENE_A_16_P03591656 | 189 | 25 | 25 | 0.540 |
| GENE_A_16_P58308586 | 144 | 21 | 22 | 0.411 |
| GENE_A_16_P58264652 | 155 | 25 | 25 | 0.443 |
| GENE_A_14_P118035   | 167 | 24 | 24 | 0.477 |
| GENE_A_16_P21236827 | 148 | 20 | 22 | 0.422 |
| GENE_A_16_P41470124 | 175 | 30 | 31 | 0.499 |
| GENE_A_16_P58265256 | 165 | 25 | 26 | 0.471 |
| GENE_A_16_P41446137 | 144 | 22 | 22 | 0.411 |
| GENE_A_18_P13864506 | 138 | 20 | 21 | 0.394 |
| GENE_A_16_P03572503 | 149 | 22 | 23 | 0.425 |
| GENE_A_16_P58297956 | 155 | 25 | 25 | 0.442 |
| GENE_A_16_P34795183 | 164 | 20 | 21 | 0.467 |
| GENE_A_16_P58307731 | 146 | 23 | 23 | 0.416 |
| GENE_A_16_P21244959 | 169 | 25 | 25 | 0.481 |
| GENE_A_16_P58292231 | 126 | 20 | 21 | 0.359 |
| GENE_A_16_P03555791 | 176 | 24 | 24 | 0.501 |
| GENE_A_16_P03596459 | 166 | 23 | 23 | 0.473 |
| GENE_A_16_P21242412 | 145 | 20 | 21 | 0.413 |
| GENE_A_16_P58282572 | 146 | 19 | 19 | 0.416 |

|                     |     |    |    |       |
|---------------------|-----|----|----|-------|
| GENE_A_18_P13874241 | 157 | 24 | 25 | 0.447 |
| GENE_A_16_P03594432 | 154 | 21 | 21 | 0.438 |
| GENE_A_16_P03596978 | 148 | 23 | 23 | 0.421 |
| GENE_A_18_P13895960 | 136 | 22 | 22 | 0.387 |
| GENE_A_16_P21256513 | 157 | 21 | 21 | 0.446 |
| GENE_A_16_P58294686 | 148 | 17 | 17 | 0.420 |
| GENE_A_16_P58284916 | 145 | 20 | 20 | 0.412 |
| GENE_A_16_P58266888 | 137 | 17 | 17 | 0.389 |
| GENE_A_16_P41405998 | 169 | 23 | 23 | 0.480 |
| GENE_A_16_P58266760 | 169 | 24 | 24 | 0.479 |
| GENE_A_16_P58308897 | 145 | 23 | 23 | 0.411 |
| GENE_A_16_P41419253 | 168 | 21 | 21 | 0.476 |
| GENE_A_16_P41447179 | 152 | 20 | 20 | 0.431 |
| GENE_A_16_P03589830 | 139 | 18 | 20 | 0.394 |
| GENE_A_16_P58293223 | 170 | 20 | 20 | 0.482 |
| GENE_A_18_P13926029 | 149 | 22 | 23 | 0.422 |
| GENE_A_16_P58274848 | 145 | 20 | 21 | 0.411 |
| GENE_A_16_P58300449 | 163 | 23 | 23 | 0.461 |
| GENE_A_16_P21193896 | 147 | 22 | 22 | 0.416 |
| GENE_A_16_P41432723 | 148 | 23 | 23 | 0.419 |
| GENE_A_16_P03585155 | 150 | 19 | 19 | 0.425 |
| GENE_A_18_P13940936 | 161 | 24 | 24 | 0.456 |
| GENE_A_18_P13883753 | 134 | 21 | 21 | 0.379 |
| GENE_A_16_P58262416 | 156 | 21 | 21 | 0.441 |
| GENE_A_16_P21220009 | 158 | 23 | 23 | 0.447 |
| GENE_A_16_P21240794 | 156 | 20 | 20 | 0.441 |
| GENE_A_16_P58265406 | 166 | 23 | 23 | 0.469 |
| GENE_A_16_P41431314 | 157 | 22 | 22 | 0.444 |
| GENE_A_16_P03593075 | 159 | 25 | 26 | 0.449 |
| GENE_A_18_P13873685 | 144 | 20 | 20 | 0.407 |
| GENE_A_16_P58294001 | 138 | 19 | 19 | 0.390 |
| GENE_A_16_P21199672 | 165 | 25 | 25 | 0.466 |
| GENE_A_16_P21220786 | 164 | 25 | 25 | 0.463 |
| GENE_A_16_P41463146 | 161 | 15 | 15 | 0.454 |
| GENE_A_16_P58262790 | 168 | 28 | 29 | 0.474 |
| GENE_A_16_P21253912 | 167 | 19 | 19 | 0.471 |
| GENE_A_16_P21260734 | 150 | 23 | 23 | 0.423 |
| GENE_A_16_P41439379 | 186 | 30 | 30 | 0.524 |
| GENE_A_16_P21198338 | 155 | 30 | 30 | 0.437 |
| GENE_A_16_P58295727 | 131 | 23 | 23 | 0.369 |
| GENE_A_16_P03590974 | 177 | 25 | 25 | 0.499 |
| GENE_A_16_P58290385 | 136 | 20 | 20 | 0.383 |
| GENE_A_16_P03589097 | 162 | 22 | 22 | 0.456 |
| GENE_A_16_P03575951 | 160 | 19 | 20 | 0.450 |
| GENE_A_16_P58300748 | 160 | 23 | 23 | 0.450 |
| GENE_A_16_P58309657 | 162 | 23 | 23 | 0.456 |

|                     |     |    |    |       |
|---------------------|-----|----|----|-------|
| GENE_A_16_P58278769 | 154 | 24 | 24 | 0.433 |
| GENE_A_16_P21262441 | 142 | 22 | 22 | 0.399 |
| GENE_A_16_P21204740 | 142 | 20 | 20 | 0.399 |
| GENE_A_18_P13880870 | 161 | 22 | 22 | 0.452 |
| GENE_A_18_P13888523 | 154 | 22 | 22 | 0.433 |
| GENE_A_16_P58306805 | 119 | 21 | 22 | 0.334 |
| GENE_A_16_P58305582 | 150 | 21 | 21 | 0.421 |
| GENE_A_16_P21197899 | 136 | 18 | 18 | 0.382 |
| GENE_A_16_P41457992 | 138 | 22 | 22 | 0.388 |
| GENE_A_16_P03566071 | 149 | 19 | 19 | 0.418 |
| GENE_A_16_P58270901 | 153 | 22 | 22 | 0.430 |
| GENE_A_16_P41397875 | 168 | 28 | 28 | 0.472 |
| GENE_A_16_P03590768 | 134 | 17 | 17 | 0.376 |
| GENE_A_16_P41446811 | 120 | 19 | 19 | 0.336 |
| GENE_A_16_P21268833 | 134 | 15 | 15 | 0.376 |
| GENE_A_16_P03586986 | 135 | 19 | 19 | 0.378 |
| GENE_A_16_P03567399 | 146 | 20 | 20 | 0.409 |
| GENE_A_16_P03576749 | 156 | 20 | 20 | 0.437 |
| GENE_A_18_P22504070 | 148 | 23 | 23 | 0.415 |
| GENE_A_18_P13912994 | 178 | 28 | 28 | 0.499 |
| GENE_A_16_P41401488 | 158 | 19 | 19 | 0.442 |
| GENE_A_16_P21247239 | 151 | 25 | 25 | 0.423 |
| GENE_A_16_P21199955 | 161 | 24 | 24 | 0.451 |
| GENE_A_16_P58308636 | 134 | 20 | 20 | 0.375 |
| GENE_A_16_P58300866 | 143 | 23 | 23 | 0.400 |
| GENE_A_16_P58263737 | 152 | 20 | 20 | 0.425 |
| GENE_A_16_P21212802 | 150 | 25 | 26 | 0.419 |
| GENE_A_16_P21258832 | 133 | 20 | 20 | 0.372 |
| GENE_A_16_P41411001 | 134 | 20 | 20 | 0.375 |
| GENE_A_16_P41438283 | 132 | 20 | 20 | 0.369 |
| GENE_A_16_P41425026 | 146 | 18 | 18 | 0.408 |
| GENE_A_16_P41427059 | 156 | 23 | 23 | 0.436 |
| GENE_A_16_P58285997 | 134 | 19 | 19 | 0.374 |
| GENE_A_16_P03581149 | 165 | 23 | 23 | 0.460 |
| GENE_A_16_P58272925 | 139 | 20 | 20 | 0.388 |
| GENE_A_16_P21211169 | 136 | 20 | 20 | 0.379 |
| GENE_A_16_P21258435 | 169 | 23 | 23 | 0.471 |
| GENE_A_16_P41445638 | 158 | 22 | 22 | 0.441 |
| GENE_A_16_P21254874 | 137 | 20 | 20 | 0.382 |
| GENE_A_16_P03572613 | 170 | 26 | 26 | 0.474 |
| GENE_A_18_P13868365 | 145 | 25 | 25 | 0.404 |
| GENE_A_16_P21202218 | 163 | 22 | 23 | 0.454 |
| GENE_A_16_P41430234 | 142 | 18 | 18 | 0.396 |
| GENE_A_18_P13935484 | 174 | 21 | 21 | 0.485 |
| GENE_A_16_P41424805 | 143 | 19 | 19 | 0.398 |
| GENE_A_16_P03564560 | 140 | 19 | 19 | 0.390 |

|                     |     |    |    |       |
|---------------------|-----|----|----|-------|
| GENE_A_16_P41415911 | 147 | 20 | 20 | 0.409 |
| GENE_A_16_P58299102 | 142 | 18 | 18 | 0.395 |
| GENE_A_16_P58279377 | 147 | 20 | 21 | 0.409 |
| GENE_A_16_P21204581 | 147 | 21 | 21 | 0.409 |
| GENE_A_16_P41449684 | 153 | 23 | 23 | 0.425 |
| GENE_A_16_P21250783 | 159 | 21 | 22 | 0.442 |
| GENE_A_16_P58287467 | 148 | 23 | 23 | 0.411 |
| GENE_A_16_P58270314 | 142 | 19 | 19 | 0.395 |
| GENE_A_16_P58274271 | 144 | 20 | 20 | 0.400 |
| GENE_A_16_P41436637 | 147 | 20 | 20 | 0.408 |
| GENE_A_16_P21239094 | 160 | 25 | 25 | 0.444 |
| GENE_A_16_P58294388 | 153 | 19 | 19 | 0.425 |
| GENE_A_16_P03595340 | 131 | 20 | 22 | 0.364 |
| GENE_A_16_P58305286 | 135 | 19 | 19 | 0.375 |
| GENE_A_16_P58269255 | 142 | 23 | 23 | 0.394 |
| GENE_A_16_P58302275 | 174 | 26 | 27 | 0.483 |
| GENE_A_18_P13869311 | 131 | 18 | 18 | 0.363 |
| GENE_A_18_P22582368 | 149 | 24 | 24 | 0.413 |
| GENE_A_16_P21202234 | 151 | 22 | 22 | 0.418 |
| GENE_A_18_P13888708 | 162 | 23 | 23 | 0.449 |
| GENE_A_16_P21203228 | 148 | 22 | 22 | 0.410 |
| GENE_A_16_P58294052 | 159 | 29 | 29 | 0.440 |
| GENE_A_16_P21213356 | 135 | 18 | 18 | 0.374 |
| GENE_A_16_P03575921 | 140 | 19 | 20 | 0.387 |
| GENE_A_16_P41421278 | 159 | 21 | 22 | 0.440 |
| GENE_A_16_P58278964 | 149 | 25 | 26 | 0.412 |
| GENE_A_16_P03577897 | 161 | 17 | 17 | 0.445 |
| GENE_A_16_P21217742 | 132 | 18 | 18 | 0.365 |
| GENE_A_16_P21223919 | 148 | 21 | 21 | 0.409 |
| GENE_A_16_P21213871 | 128 | 18 | 18 | 0.354 |
| GENE_A_16_P58272280 | 150 | 24 | 24 | 0.415 |
| GENE_A_18_P13938905 | 144 | 20 | 20 | 0.398 |
| GENE_A_16_P21206053 | 155 | 23 | 25 | 0.428 |
| GENE_A_18_P13903612 | 139 | 20 | 20 | 0.384 |
| GENE_A_16_P03575182 | 145 | 21 | 21 | 0.401 |
| GENE_A_16_P58290354 | 142 | 23 | 23 | 0.392 |
| GENE_A_18_P22541156 | 143 | 19 | 21 | 0.395 |
| GENE_A_16_P21231823 | 154 | 23 | 23 | 0.425 |
| GENE_A_18_P22561041 | 150 | 17 | 17 | 0.414 |
| GENE_A_16_P03554879 | 154 | 22 | 22 | 0.425 |
| GENE_A_16_P03564763 | 153 | 25 | 25 | 0.422 |
| GENE_A_16_P58291754 | 168 | 18 | 18 | 0.463 |
| GENE_A_18_P22495431 | 129 | 18 | 18 | 0.356 |
| GENE_A_18_P13927550 | 132 | 19 | 19 | 0.364 |
| GENE_A_16_P41407782 | 166 | 21 | 21 | 0.457 |
| GENE_A_18_P13870197 | 160 | 22 | 22 | 0.441 |

|                     |     |    |    |       |
|---------------------|-----|----|----|-------|
| GENE_A_16_P41398335 | 138 | 18 | 18 | 0.380 |
| GENE_A_16_P41425762 | 132 | 21 | 21 | 0.364 |
| GENE_A_16_P21267516 | 168 | 23 | 23 | 0.462 |
| GENE_A_16_P58291796 | 138 | 18 | 18 | 0.380 |
| GENE_A_16_P58278106 | 144 | 20 | 20 | 0.396 |
| GENE_A_16_P58298262 | 175 | 25 | 25 | 0.482 |
| GENE_A_16_P58283961 | 155 | 23 | 24 | 0.426 |
| GENE_A_18_P13852245 | 159 | 23 | 23 | 0.437 |
| GENE_A_16_P21213299 | 162 | 26 | 26 | 0.445 |
| GENE_A_16_P41413718 | 155 | 25 | 25 | 0.426 |
| GENE_A_16_P58270509 | 141 | 20 | 20 | 0.388 |
| GENE_A_16_P21204599 | 126 | 16 | 16 | 0.346 |
| GENE_A_16_P03582295 | 157 | 25 | 27 | 0.431 |
| GENE_A_18_P13879257 | 160 | 25 | 25 | 0.440 |
| GENE_A_16_P21254447 | 139 | 21 | 21 | 0.382 |
| GENE_A_16_P21211400 | 161 | 24 | 25 | 0.442 |
| GENE_A_16_P03559557 | 146 | 22 | 22 | 0.401 |
| GENE_A_18_P13883065 | 149 | 23 | 23 | 0.409 |
| GENE_A_18_P13884129 | 126 | 19 | 19 | 0.346 |
| GENE_A_16_P58297571 | 169 | 26 | 26 | 0.464 |
| GENE_A_16_P58291397 | 149 | 20 | 21 | 0.409 |
| GENE_A_16_P58259568 | 153 | 23 | 24 | 0.419 |
| GENE_A_18_P13891636 | 138 | 19 | 19 | 0.378 |
| GENE_A_16_P41412397 | 152 | 21 | 21 | 0.416 |
| GENE_A_18_P13893549 | 167 | 24 | 24 | 0.458 |
| GENE_A_16_P58273301 | 145 | 23 | 23 | 0.397 |
| GENE_A_16_P41414925 | 156 | 21 | 22 | 0.427 |
| GENE_A_16_P58281222 | 120 | 17 | 17 | 0.329 |
| GENE_A_16_P21236547 | 133 | 20 | 20 | 0.364 |
| GENE_A_16_P41439341 | 158 | 23 | 23 | 0.432 |
| GENE_A_16_P41449300 | 154 | 22 | 22 | 0.421 |
| GENE_A_16_P41429870 | 163 | 26 | 26 | 0.446 |
| GENE_A_16_P03585845 | 153 | 20 | 21 | 0.418 |
| GENE_A_16_P03587396 | 166 | 21 | 21 | 0.454 |
| GENE_A_16_P21193603 | 147 | 20 | 21 | 0.402 |
| GENE_A_16_P58303621 | 147 | 23 | 23 | 0.402 |
| GENE_A_16_P41391128 | 180 | 26 | 26 | 0.491 |
| GENE_A_16_P58275156 | 151 | 21 | 21 | 0.412 |
| GENE_A_18_P13946179 | 167 | 26 | 26 | 0.456 |
| GENE_A_16_P03554196 | 168 | 24 | 24 | 0.458 |
| GENE_A_16_P21230922 | 148 | 18 | 18 | 0.404 |
| GENE_A_16_P03554344 | 123 | 18 | 18 | 0.335 |
| GENE_A_16_P21198413 | 175 | 21 | 22 | 0.477 |
| GENE_A_16_P21216127 | 161 | 21 | 21 | 0.439 |
| GENE_A_16_P41391454 | 151 | 21 | 21 | 0.412 |
| GENE_A_16_P03595115 | 167 | 19 | 20 | 0.455 |

|                     |     |    |    |       |
|---------------------|-----|----|----|-------|
| GENE_A_16_P21237209 | 144 | 16 | 16 | 0.392 |
| GENE_A_16_P03577974 | 163 | 22 | 22 | 0.444 |
| GENE_A_16_P58302842 | 168 | 24 | 24 | 0.458 |
| GENE_A_16_P58276367 | 121 | 16 | 16 | 0.329 |
| GENE_A_16_P21222616 | 161 | 23 | 23 | 0.438 |
| GENE_A_16_P58277674 | 150 | 18 | 18 | 0.408 |
| GENE_A_16_P21191052 | 158 | 26 | 26 | 0.430 |
| GENE_A_16_P21215348 | 173 | 19 | 19 | 0.471 |
| GENE_A_16_P58280450 | 168 | 25 | 25 | 0.457 |
| GENE_A_16_P21259755 | 140 | 20 | 20 | 0.381 |
| GENE_A_16_P03578730 | 150 | 18 | 18 | 0.408 |
| GENE_A_16_P03566488 | 160 | 23 | 23 | 0.435 |
| GENE_A_16_P03591652 | 157 | 22 | 22 | 0.427 |
| GENE_A_16_P03595561 | 160 | 16 | 16 | 0.435 |
| GENE_A_16_P21196144 | 145 | 20 | 20 | 0.394 |
| GENE_A_16_P21244427 | 134 | 18 | 18 | 0.364 |
| GENE_A_16_P58274555 | 143 | 18 | 18 | 0.389 |
| GENE_A_18_P13886359 | 147 | 21 | 21 | 0.399 |
| GENE_A_16_P41458099 | 168 | 24 | 24 | 0.456 |
| GENE_A_18_P13924079 | 146 | 21 | 21 | 0.397 |
| GENE_A_18_P22560875 | 170 | 25 | 25 | 0.462 |
| GENE_A_16_P21271152 | 161 | 21 | 21 | 0.437 |
| GENE_A_16_P21208438 | 139 | 18 | 19 | 0.377 |
| GENE_A_18_P13893232 | 170 | 20 | 20 | 0.462 |
| GENE_A_16_P21222047 | 148 | 23 | 23 | 0.402 |
| GENE_A_16_P58270295 | 143 | 19 | 19 | 0.388 |
| GENE_A_16_P21196770 | 136 | 22 | 22 | 0.369 |
| GENE_A_16_P21214857 | 159 | 23 | 23 | 0.431 |
| GENE_A_16_P03597379 | 145 | 23 | 23 | 0.393 |
| GENE_A_16_P41461392 | 134 | 20 | 20 | 0.363 |
| GENE_A_16_P03552860 | 159 | 20 | 20 | 0.431 |
| GENE_A_16_P03587959 | 136 | 17 | 18 | 0.369 |
| GENE_A_16_P21248140 | 147 | 20 | 21 | 0.398 |
| GENE_A_16_P21196358 | 153 | 23 | 23 | 0.415 |
| GENE_A_16_P58275250 | 131 | 18 | 18 | 0.355 |
| GENE_A_16_P21260603 | 145 | 23 | 23 | 0.393 |
| GENE_A_16_P03574560 | 168 | 21 | 21 | 0.455 |
| GENE_A_16_P58305357 | 159 | 22 | 23 | 0.431 |
| GENE_A_16_P03586724 | 154 | 19 | 19 | 0.417 |
| GENE_A_16_P58300266 | 138 | 17 | 17 | 0.374 |
| GENE_A_16_P21256143 | 139 | 20 | 20 | 0.376 |
| GENE_A_16_P58270001 | 162 | 20 | 21 | 0.438 |
| GENE_A_16_P03583595 | 155 | 25 | 26 | 0.419 |
| GENE_A_18_P13926791 | 165 | 28 | 28 | 0.446 |
| GENE_A_16_P03580881 | 155 | 23 | 23 | 0.419 |
| GENE_A_16_P21243725 | 178 | 28 | 28 | 0.481 |



|                     |     |    |    |       |
|---------------------|-----|----|----|-------|
| GENE_A_16_P03585093 | 170 | 24 | 24 | 0.460 |
| GENE_A_16_P58286941 | 148 | 20 | 20 | 0.400 |
| GENE_A_14_P116756   | 139 | 19 | 19 | 0.376 |
| GENE_A_16_P21244480 | 173 | 24 | 24 | 0.468 |
| GENE_A_18_P22596734 | 156 | 24 | 24 | 0.422 |
| GENE_A_16_P58276110 | 155 | 23 | 23 | 0.419 |
| GENE_A_16_P21258552 | 151 | 24 | 24 | 0.408 |
| GENE_A_16_P41391399 | 166 | 25 | 25 | 0.449 |
| GENE_A_16_P21205661 | 152 | 21 | 21 | 0.411 |
| GENE_A_18_P13909872 | 146 | 21 | 21 | 0.394 |
| GENE_A_16_P58274186 | 169 | 25 | 25 | 0.456 |
| GENE_A_16_P03580699 | 151 | 19 | 19 | 0.407 |
| GENE_A_16_P21202806 | 141 | 20 | 20 | 0.381 |
| GENE_A_16_P21254583 | 172 | 21 | 21 | 0.464 |
| GENE_A_16_P58283542 | 161 | 24 | 24 | 0.434 |
| GENE_A_16_P58272822 | 143 | 19 | 19 | 0.386 |
| GENE_A_16_P58309662 | 142 | 22 | 22 | 0.383 |
| GENE_A_16_P58286598 | 159 | 20 | 21 | 0.429 |
| GENE_A_16_P03578214 | 152 | 23 | 23 | 0.410 |
| GENE_A_18_P22568826 | 161 | 19 | 19 | 0.434 |
| GENE_A_16_P03582109 | 142 | 20 | 20 | 0.383 |
| GENE_A_16_P58285847 | 165 | 23 | 23 | 0.445 |
| GENE_A_16_P58308951 | 162 | 20 | 20 | 0.437 |
| GENE_A_16_P58289989 | 147 | 21 | 21 | 0.396 |
| GENE_A_16_P21206058 | 163 | 22 | 22 | 0.439 |
| GENE_A_16_P03553369 | 163 | 25 | 26 | 0.439 |
| GENE_A_16_P41450319 | 153 | 14 | 14 | 0.412 |
| GENE_A_16_P03570059 | 147 | 18 | 18 | 0.396 |
| GENE_A_16_P58288587 | 157 | 22 | 22 | 0.422 |
| GENE_A_16_P03586749 | 162 | 23 | 26 | 0.436 |
| GENE_A_16_P21196312 | 127 | 15 | 18 | 0.341 |
| GENE_A_16_P03596866 | 152 | 21 | 21 | 0.409 |
| GENE_A_16_P34820638 | 132 | 19 | 19 | 0.355 |
| GENE_A_16_P58271239 | 128 | 19 | 19 | 0.344 |
| GENE_A_16_P58297094 | 146 | 17 | 17 | 0.392 |
| GENE_A_16_P03582678 | 150 | 24 | 24 | 0.403 |
| GENE_A_18_P13883199 | 151 | 22 | 22 | 0.406 |
| GENE_A_16_P41454929 | 163 | 25 | 25 | 0.438 |
| GENE_A_16_P41429156 | 149 | 21 | 21 | 0.400 |
| GENE_A_16_P03576925 | 162 | 26 | 26 | 0.435 |
| GENE_A_16_P03581209 | 147 | 23 | 23 | 0.395 |
| GENE_A_16_P34768499 | 161 | 23 | 24 | 0.432 |
| GENE_A_16_P58277331 | 168 | 23 | 24 | 0.451 |
| GENE_A_16_P58275080 | 152 | 23 | 24 | 0.408 |
| GENE_A_16_P58281501 | 146 | 18 | 18 | 0.392 |
| GENE_A_16_P58265443 | 160 | 22 | 22 | 0.429 |

|                     |     |    |    |       |
|---------------------|-----|----|----|-------|
| GENE_A_16_P03591426 | 163 | 21 | 21 | 0.437 |
| GENE_A_16_P21251434 | 146 | 18 | 18 | 0.391 |
| GENE_A_16_P21251535 | 144 | 20 | 21 | 0.386 |
| GENE_A_16_P58273957 | 157 | 24 | 24 | 0.420 |
| GENE_A_18_P13944666 | 142 | 20 | 20 | 0.380 |
| GENE_A_16_P41441651 | 137 | 16 | 16 | 0.367 |
| GENE_A_16_P41440963 | 144 | 22 | 22 | 0.385 |
| GENE_A_16_P21212981 | 152 | 16 | 17 | 0.407 |
| GENE_A_16_P03594555 | 140 | 22 | 22 | 0.375 |
| GENE_A_16_P58271382 | 170 | 23 | 23 | 0.455 |
| GENE_A_18_P13880535 | 156 | 19 | 19 | 0.417 |
| GENE_A_16_P41426429 | 145 | 22 | 22 | 0.388 |
| GENE_A_16_P21269363 | 156 | 25 | 25 | 0.417 |
| GENE_A_16_P21232642 | 131 | 16 | 16 | 0.350 |
| GENE_A_16_P03555200 | 150 | 24 | 25 | 0.401 |
| GENE_A_16_P21202552 | 148 | 22 | 22 | 0.396 |
| GENE_A_16_P41431207 | 151 | 24 | 24 | 0.403 |
| GENE_A_16_P03578687 | 152 | 23 | 23 | 0.406 |
| GENE_A_18_P13873632 | 160 | 24 | 24 | 0.427 |
| GENE_A_16_P21249093 | 156 | 23 | 24 | 0.417 |
| GENE_A_18_P13904389 | 163 | 24 | 24 | 0.435 |
| GENE_A_16_P58300451 | 149 | 21 | 21 | 0.398 |
| GENE_A_16_P03576693 | 174 | 26 | 26 | 0.464 |
| GENE_A_16_P21262885 | 137 | 14 | 14 | 0.366 |
| GENE_A_16_P58265603 | 144 | 17 | 17 | 0.384 |
| GENE_A_18_P22560556 | 135 | 19 | 19 | 0.360 |
| GENE_A_16_P41423787 | 159 | 17 | 17 | 0.424 |
| GENE_A_18_P22517109 | 141 | 21 | 21 | 0.376 |
| GENE_A_18_P22585026 | 169 | 25 | 26 | 0.451 |
| GENE_A_18_P13861366 | 155 | 24 | 24 | 0.413 |
| GENE_A_16_P58279317 | 138 | 16 | 17 | 0.368 |
| GENE_A_16_P58307535 | 153 | 15 | 15 | 0.408 |
| GENE_A_16_P21216259 | 120 | 15 | 15 | 0.320 |
| GENE_A_16_P21215796 | 124 | 17 | 17 | 0.330 |
| GENE_A_16_P34781085 | 146 | 20 | 20 | 0.389 |
| GENE_A_16_P21230564 | 128 | 18 | 18 | 0.341 |
| GENE_A_18_P13881841 | 151 | 21 | 21 | 0.402 |
| GENE_A_16_P58279196 | 153 | 21 | 21 | 0.407 |
| GENE_A_16_P03582466 | 140 | 16 | 16 | 0.373 |
| GENE_A_16_P03578552 | 144 | 20 | 20 | 0.383 |
| GENE_A_16_P58281711 | 168 | 21 | 21 | 0.447 |
| GENE_A_16_P03564441 | 131 | 22 | 22 | 0.349 |
| GENE_A_16_P58273243 | 150 | 22 | 22 | 0.399 |
| GENE_A_16_P41427686 | 137 | 19 | 19 | 0.365 |
| GENE_A_16_P21268979 | 158 | 21 | 21 | 0.420 |
| GENE_A_16_P58296881 | 154 | 13 | 13 | 0.410 |

|                     |     |    |    |       |
|---------------------|-----|----|----|-------|
| GENE_A_16_P58288195 | 142 | 19 | 19 | 0.378 |
| GENE_A_16_P58287243 | 145 | 18 | 18 | 0.386 |
| GENE_A_16_P58275775 | 137 | 18 | 18 | 0.364 |
| GENE_A_16_P58274065 | 133 | 18 | 18 | 0.354 |
| GENE_A_16_P58307722 | 166 | 20 | 20 | 0.441 |
| GENE_A_16_P58281975 | 156 | 19 | 20 | 0.415 |
| GENE_A_16_P21210400 | 152 | 21 | 22 | 0.404 |
| GENE_A_16_P58289066 | 147 | 21 | 21 | 0.391 |
| GENE_A_16_P58282918 | 146 | 23 | 23 | 0.388 |
| GENE_A_18_P22551217 | 135 | 17 | 17 | 0.359 |
| GENE_A_16_P03584520 | 154 | 23 | 23 | 0.409 |
| GENE_A_16_P58307098 | 143 | 20 | 21 | 0.380 |
| GENE_A_16_P21224717 | 157 | 22 | 22 | 0.417 |
| GENE_A_16_P03580664 | 167 | 25 | 25 | 0.443 |
| GENE_A_16_P21265097 | 151 | 22 | 22 | 0.401 |
| GENE_A_16_P21261797 | 159 | 16 | 17 | 0.422 |
| GENE_A_16_P03580238 | 163 | 22 | 24 | 0.433 |
| GENE_A_18_P13922744 | 166 | 21 | 21 | 0.441 |
| GENE_A_18_P13918653 | 147 | 23 | 23 | 0.390 |
| GENE_A_16_P41440717 | 144 | 18 | 18 | 0.382 |
| GENE_A_16_P21203590 | 147 | 15 | 16 | 0.390 |
| GENE_A_16_P03578289 | 143 | 21 | 21 | 0.379 |
| GENE_A_16_P03578600 | 146 | 20 | 20 | 0.387 |
| GENE_A_16_P03555444 | 148 | 19 | 19 | 0.392 |
| GENE_A_16_P41416384 | 163 | 27 | 27 | 0.432 |
| GENE_A_16_P58272487 | 188 | 31 | 31 | 0.498 |
| GENE_A_16_P03576077 | 147 | 22 | 22 | 0.389 |
| GENE_A_16_P21250796 | 155 | 20 | 20 | 0.410 |
| GENE_A_16_P21238821 | 134 | 19 | 19 | 0.355 |
| GENE_A_16_P58281760 | 155 | 21 | 21 | 0.410 |
| GENE_A_16_P58281332 | 155 | 20 | 20 | 0.410 |
| GENE_A_16_P03583226 | 138 | 22 | 22 | 0.365 |
| GENE_A_18_P22605914 | 125 | 17 | 18 | 0.331 |
| GENE_A_16_P03572429 | 151 | 18 | 19 | 0.399 |
| GENE_A_16_P21197362 | 153 | 19 | 19 | 0.405 |
| GENE_A_16_P58269631 | 149 | 20 | 20 | 0.394 |
| GENE_A_18_P13886776 | 164 | 22 | 22 | 0.433 |
| GENE_A_16_P03566806 | 170 | 20 | 20 | 0.449 |
| GENE_A_16_P58272019 | 176 | 20 | 21 | 0.465 |
| GENE_A_16_P03587565 | 147 | 19 | 19 | 0.388 |
| GENE_A_16_P41467325 | 135 | 19 | 19 | 0.357 |
| GENE_A_16_P21224075 | 136 | 16 | 16 | 0.359 |
| GENE_A_16_P41415657 | 134 | 20 | 20 | 0.354 |
| GENE_A_16_P41396468 | 162 | 20 | 20 | 0.428 |
| GENE_A_18_P13892343 | 158 | 21 | 21 | 0.417 |
| GENE_A_16_P34809936 | 154 | 26 | 26 | 0.407 |

|                     |     |    |    |       |
|---------------------|-----|----|----|-------|
| GENE_A_16_P41426199 | 151 | 16 | 16 | 0.398 |
| GENE_A_18_P22526973 | 153 | 24 | 24 | 0.404 |
| GENE_A_16_P58297522 | 148 | 13 | 13 | 0.390 |
| GENE_A_18_P13933707 | 167 | 25 | 25 | 0.440 |
| GENE_A_16_P21209002 | 150 | 23 | 23 | 0.396 |
| GENE_A_16_P21205468 | 154 | 19 | 19 | 0.406 |
| GENE_A_16_P41437267 | 157 | 22 | 22 | 0.414 |
| GENE_A_16_P21265434 | 163 | 22 | 22 | 0.429 |
| GENE_A_16_P58270146 | 139 | 17 | 17 | 0.366 |
| GENE_A_18_P22568443 | 152 | 20 | 20 | 0.400 |
| GENE_A_16_P58273942 | 159 | 20 | 20 | 0.419 |
| GENE_A_16_P21256406 | 162 | 19 | 19 | 0.427 |
| GENE_A_16_P41452124 | 154 | 24 | 24 | 0.405 |
| GENE_A_16_P21245280 | 146 | 22 | 22 | 0.384 |
| GENE_A_16_P58288886 | 162 | 22 | 25 | 0.426 |
| GENE_A_18_P13947900 | 131 | 18 | 18 | 0.344 |
| GENE_A_16_P58269384 | 158 | 18 | 18 | 0.415 |
| GENE_A_16_P03589123 | 167 | 21 | 21 | 0.439 |
| GENE_A_16_P03573712 | 157 | 27 | 27 | 0.412 |
| GENE_A_16_P58294844 | 135 | 22 | 22 | 0.355 |
| GENE_A_16_P58307012 | 165 | 23 | 24 | 0.433 |
| GENE_A_18_P22545857 | 154 | 20 | 20 | 0.404 |
| GENE_A_18_P13924130 | 131 | 19 | 19 | 0.344 |
| GENE_A_16_P03595918 | 143 | 20 | 20 | 0.375 |
| GENE_A_16_P03584097 | 162 | 25 | 25 | 0.425 |
| GENE_A_18_P13893407 | 162 | 23 | 23 | 0.425 |
| GENE_A_16_P21208740 | 149 | 17 | 17 | 0.391 |
| GENE_A_16_P21259402 | 145 | 18 | 18 | 0.380 |
| GENE_A_16_P21219811 | 168 | 21 | 21 | 0.440 |
| GENE_A_16_P21219513 | 151 | 19 | 19 | 0.395 |
| GENE_A_16_P41398406 | 149 | 20 | 21 | 0.390 |
| GENE_A_18_P13888478 | 149 | 20 | 20 | 0.390 |
| GENE_A_16_P58269063 | 159 | 25 | 26 | 0.416 |
| GENE_A_16_P41411619 | 157 | 20 | 21 | 0.410 |
| GENE_A_16_P03552072 | 155 | 26 | 26 | 0.405 |
| GENE_A_16_P03556629 | 148 | 23 | 23 | 0.387 |
| GENE_A_16_P41438780 | 155 | 21 | 21 | 0.405 |
| GENE_A_16_P21255966 | 168 | 23 | 23 | 0.439 |
| GENE_A_16_P58292229 | 171 | 25 | 26 | 0.446 |
| GENE_A_18_P13871196 | 152 | 20 | 20 | 0.397 |
| GENE_A_16_P03583303 | 139 | 21 | 21 | 0.363 |
| GENE_A_16_P03580319 | 151 | 23 | 23 | 0.394 |
| GENE_A_16_P21240020 | 173 | 18 | 18 | 0.451 |
| GENE_A_16_P58280995 | 135 | 18 | 18 | 0.352 |
| GENE_A_16_P58300003 | 141 | 19 | 19 | 0.368 |
| GENE_A_16_P03588752 | 149 | 23 | 23 | 0.388 |

|                     |     |    |    |       |
|---------------------|-----|----|----|-------|
| GENE_A_16_P03579962 | 152 | 22 | 22 | 0.396 |
| GENE_A_16_P21206150 | 140 | 17 | 17 | 0.365 |
| GENE_A_16_P21196382 | 158 | 22 | 22 | 0.412 |
| GENE_A_16_P21204874 | 169 | 21 | 21 | 0.440 |
| GENE_A_16_P21252748 | 152 | 14 | 14 | 0.396 |
| GENE_A_16_P58300837 | 150 | 21 | 21 | 0.391 |
| GENE_A_16_P58284076 | 171 | 27 | 27 | 0.445 |
| GENE_A_14_P133103   | 151 | 18 | 20 | 0.393 |
| GENE_A_16_P41390296 | 139 | 21 | 21 | 0.362 |
| GENE_A_16_P21261692 | 151 | 21 | 21 | 0.393 |
| GENE_A_18_P13923053 | 151 | 17 | 17 | 0.393 |
| GENE_A_16_P21216635 | 167 | 23 | 23 | 0.434 |
| GENE_A_16_P21255691 | 134 | 18 | 19 | 0.348 |
| GENE_A_18_P13868391 | 138 | 14 | 14 | 0.359 |
| GENE_A_16_P58265362 | 145 | 19 | 19 | 0.377 |
| GENE_A_16_P58305701 | 146 | 19 | 19 | 0.379 |
| GENE_A_16_P21237608 | 158 | 19 | 19 | 0.410 |
| GENE_A_16_P21204222 | 169 | 26 | 26 | 0.439 |
| GENE_A_16_P03571183 | 157 | 22 | 22 | 0.407 |
| GENE_A_16_P41415626 | 151 | 22 | 22 | 0.392 |
| GENE_A_18_P13911534 | 143 | 18 | 19 | 0.371 |
| GENE_A_16_P41435207 | 164 | 23 | 23 | 0.425 |
| GENE_A_16_P58270873 | 180 | 24 | 24 | 0.467 |
| GENE_A_16_P58298891 | 142 | 15 | 15 | 0.368 |
| GENE_A_16_P03551140 | 150 | 17 | 17 | 0.389 |
| GENE_A_18_P22484284 | 146 | 19 | 20 | 0.378 |
| GENE_A_16_P03581029 | 150 | 18 | 18 | 0.389 |
| GENE_A_16_P58270534 | 164 | 24 | 26 | 0.425 |
| GENE_A_16_P21206442 | 160 | 22 | 22 | 0.415 |
| GENE_A_16_P41398265 | 172 | 23 | 23 | 0.446 |
| GENE_A_16_P58266040 | 148 | 19 | 19 | 0.383 |
| GENE_A_16_P58300406 | 159 | 23 | 23 | 0.412 |
| GENE_A_16_P21197849 | 142 | 22 | 23 | 0.367 |
| GENE_A_16_P21232142 | 124 | 15 | 15 | 0.320 |
| GENE_A_16_P41443086 | 164 | 23 | 24 | 0.423 |
| GENE_A_18_P13870886 | 142 | 19 | 19 | 0.367 |
| GENE_A_16_P21222988 | 157 | 18 | 18 | 0.405 |
| GENE_A_16_P41446166 | 134 | 17 | 17 | 0.346 |
| GENE_A_18_P13933103 | 140 | 19 | 19 | 0.361 |
| GENE_A_16_P58294533 | 149 | 17 | 17 | 0.384 |
| GENE_A_16_P58302123 | 158 | 22 | 22 | 0.407 |
| GENE_A_18_P13865410 | 151 | 16 | 16 | 0.389 |
| GENE_A_16_P03557696 | 140 | 19 | 19 | 0.361 |
| GENE_A_18_P13869481 | 147 | 22 | 22 | 0.379 |
| GENE_A_16_P03577061 | 175 | 22 | 22 | 0.451 |
| GENE_A_16_P58297811 | 169 | 23 | 23 | 0.435 |

|                     |     |    |    |       |
|---------------------|-----|----|----|-------|
| GENE_A_16_P21230217 | 152 | 22 | 22 | 0.392 |
| GENE_A_16_P58281492 | 151 | 25 | 25 | 0.389 |
| GENE_A_18_P13874291 | 151 | 16 | 16 | 0.389 |
| GENE_A_18_P13879455 | 141 | 18 | 18 | 0.363 |
| GENE_A_16_P58285410 | 138 | 17 | 17 | 0.355 |
| GENE_A_16_P03588693 | 151 | 20 | 20 | 0.388 |
| GENE_A_16_P58299071 | 140 | 22 | 22 | 0.360 |
| GENE_A_16_P58266630 | 151 | 19 | 20 | 0.388 |
| GENE_A_16_P03564246 | 153 | 24 | 24 | 0.393 |
| GENE_A_16_P58296910 | 164 | 23 | 23 | 0.422 |
| GENE_A_16_P21224855 | 143 | 19 | 19 | 0.368 |
| GENE_A_16_P58277533 | 147 | 15 | 16 | 0.378 |
| GENE_A_16_P03583428 | 140 | 19 | 19 | 0.360 |
| GENE_A_16_P58264696 | 154 | 18 | 18 | 0.396 |
| GENE_A_16_P21202964 | 182 | 27 | 27 | 0.468 |
| GENE_A_16_P21270487 | 161 | 17 | 17 | 0.414 |
| GENE_A_16_P58302534 | 143 | 20 | 20 | 0.367 |
| GENE_A_16_P21223749 | 154 | 23 | 24 | 0.395 |
| GENE_A_16_P58290577 | 152 | 20 | 20 | 0.390 |
| GENE_A_16_P58293406 | 157 | 19 | 19 | 0.403 |
| GENE_A_16_P58292611 | 161 | 24 | 24 | 0.413 |
| GENE_A_16_P58259923 | 147 | 19 | 19 | 0.377 |
| GENE_A_18_P13877044 | 154 | 20 | 20 | 0.395 |
| GENE_A_16_P58303278 | 167 | 22 | 22 | 0.429 |
| GENE_A_18_P13875775 | 157 | 25 | 25 | 0.403 |
| GENE_A_18_P13881416 | 144 | 19 | 20 | 0.369 |
| GENE_A_16_P21215013 | 155 | 22 | 22 | 0.397 |
| GENE_A_16_P58285230 | 158 | 18 | 19 | 0.405 |
| GENE_A_16_P58260904 | 141 | 16 | 16 | 0.362 |
| GENE_A_16_P21232291 | 161 | 21 | 21 | 0.413 |
| GENE_A_16_P58268726 | 150 | 17 | 17 | 0.384 |
| GENE_A_16_P03585964 | 129 | 17 | 17 | 0.331 |
| GENE_A_16_P58269450 | 162 | 23 | 23 | 0.415 |
| GENE_A_16_P03556413 | 137 | 15 | 15 | 0.351 |
| GENE_A_16_P58260793 | 149 | 21 | 21 | 0.382 |
| GENE_A_16_P58270542 | 152 | 15 | 15 | 0.389 |
| GENE_A_18_P13886201 | 154 | 19 | 19 | 0.394 |
| GENE_A_16_P58300368 | 143 | 17 | 17 | 0.366 |
| GENE_A_16_P03572230 | 143 | 17 | 17 | 0.366 |
| GENE_A_16_P58277825 | 157 | 21 | 21 | 0.402 |
| GENE_A_18_P13892407 | 147 | 20 | 20 | 0.376 |
| GENE_A_16_P03563678 | 161 | 19 | 20 | 0.412 |
| GENE_A_16_P03573242 | 152 | 18 | 18 | 0.389 |
| GENE_A_16_P58272386 | 149 | 20 | 20 | 0.381 |
| GENE_A_16_P03596338 | 158 | 17 | 17 | 0.404 |
| GENE_A_16_P21206437 | 136 | 18 | 18 | 0.348 |

|                     |     |    |    |       |
|---------------------|-----|----|----|-------|
| GENE_A_16_P41442870 | 160 | 20 | 20 | 0.409 |
| GENE_A_16_P03597328 | 160 | 22 | 22 | 0.409 |
| GENE_A_16_P41413622 | 128 | 17 | 17 | 0.327 |
| GENE_A_16_P34807386 | 141 | 19 | 19 | 0.361 |
| GENE_A_16_P21251750 | 147 | 23 | 23 | 0.376 |
| GENE_A_16_P21205654 | 139 | 17 | 17 | 0.355 |
| GENE_A_16_P21212258 | 148 | 18 | 18 | 0.378 |
| GENE_A_16_P21253347 | 141 | 17 | 17 | 0.360 |
| GENE_A_16_P21224139 | 142 | 19 | 21 | 0.363 |
| GENE_A_16_P03576453 | 156 | 23 | 23 | 0.399 |
| GENE_A_16_P03576592 | 170 | 23 | 23 | 0.434 |
| GENE_A_18_P13889309 | 152 | 18 | 20 | 0.388 |
| GENE_A_16_P41424263 | 170 | 22 | 22 | 0.434 |
| GENE_A_16_P03591916 | 130 | 19 | 19 | 0.332 |
| GENE_A_16_P41432049 | 138 | 16 | 16 | 0.352 |
| GENE_A_16_P21254192 | 133 | 19 | 19 | 0.339 |
| GENE_A_18_P22561105 | 146 | 17 | 17 | 0.372 |
| GENE_A_16_P03579670 | 156 | 24 | 24 | 0.398 |
| GENE_A_16_P21205414 | 145 | 15 | 15 | 0.369 |
| GENE_A_16_P34812841 | 167 | 22 | 22 | 0.425 |
| GENE_A_16_P21217107 | 162 | 21 | 21 | 0.413 |
| GENE_A_16_P21195599 | 135 | 17 | 17 | 0.344 |
| GENE_A_16_P21193790 | 151 | 18 | 18 | 0.385 |
| GENE_A_18_P22553526 | 137 | 17 | 17 | 0.349 |
| GENE_A_16_P21215727 | 151 | 17 | 18 | 0.384 |
| GENE_A_16_P21254951 | 148 | 18 | 19 | 0.377 |
| GENE_A_16_P03570639 | 145 | 21 | 21 | 0.369 |
| GENE_A_18_P22591147 | 152 | 19 | 19 | 0.387 |
| GENE_A_16_P03595527 | 151 | 20 | 21 | 0.384 |
| GENE_A_16_P03593080 | 139 | 20 | 20 | 0.354 |
| GENE_A_16_P41401033 | 177 | 24 | 24 | 0.450 |
| GENE_A_16_P58293880 | 140 | 20 | 20 | 0.356 |
| GENE_A_18_P13909554 | 143 | 22 | 23 | 0.364 |
| GENE_A_18_P22493591 | 160 | 16 | 16 | 0.407 |
| GENE_A_16_P03588120 | 118 | 18 | 18 | 0.300 |
| GENE_A_16_P58289492 | 162 | 24 | 24 | 0.412 |
| GENE_A_16_P41412822 | 150 | 19 | 19 | 0.381 |
| GENE_A_18_P22504589 | 147 | 21 | 21 | 0.373 |
| GENE_A_16_P41400269 | 154 | 17 | 17 | 0.391 |
| GENE_A_16_P34767287 | 152 | 19 | 20 | 0.386 |
| GENE_A_16_P41409964 | 143 | 19 | 19 | 0.363 |
| GENE_A_16_P58291907 | 160 | 20 | 20 | 0.406 |
| GENE_A_16_P21234847 | 152 | 18 | 19 | 0.386 |
| GENE_A_18_P13897221 | 149 | 19 | 19 | 0.378 |
| GENE_A_18_P13868253 | 157 | 22 | 22 | 0.398 |
| GENE_A_16_P41440680 | 158 | 23 | 23 | 0.401 |

|                     |     |    |    |       |
|---------------------|-----|----|----|-------|
| GENE_A_16_P58270121 | 152 | 20 | 20 | 0.386 |
| GENE_A_16_P58262904 | 173 | 26 | 26 | 0.439 |
| GENE_A_16_P58265674 | 150 | 22 | 22 | 0.380 |
| GENE_A_16_P03570914 | 131 | 23 | 24 | 0.332 |
| GENE_A_18_P22559707 | 151 | 19 | 19 | 0.383 |
| GENE_A_16_P58296597 | 155 | 20 | 20 | 0.393 |
| GENE_A_16_P58273233 | 151 | 17 | 18 | 0.383 |
| GENE_A_16_P58260545 | 146 | 19 | 19 | 0.370 |
| GENE_A_16_P41392117 | 160 | 22 | 23 | 0.405 |
| GENE_A_16_P41399335 | 149 | 21 | 21 | 0.377 |
| GENE_A_16_P21214698 | 153 | 19 | 19 | 0.387 |
| GENE_A_16_P58279220 | 152 | 20 | 20 | 0.385 |
| GENE_A_16_P21252926 | 137 | 19 | 19 | 0.347 |
| GENE_A_16_P58308287 | 158 | 21 | 21 | 0.400 |
| GENE_A_16_P21204631 | 131 | 17 | 17 | 0.331 |
| GENE_A_16_P58263249 | 147 | 20 | 20 | 0.372 |
| GENE_A_18_P13902760 | 159 | 23 | 23 | 0.402 |
| GENE_A_16_P58273303 | 139 | 13 | 13 | 0.351 |
| GENE_A_18_P13859250 | 157 | 20 | 20 | 0.397 |
| GENE_A_18_P13940957 | 106 | 14 | 14 | 0.268 |
| GENE_A_16_P41426972 | 139 | 18 | 18 | 0.351 |
| GENE_A_16_P03552048 | 147 | 18 | 18 | 0.371 |
| GENE_A_16_P03589755 | 150 | 17 | 17 | 0.379 |
| GENE_A_18_P13926454 | 152 | 24 | 24 | 0.384 |
| GENE_A_18_P13864539 | 133 | 19 | 19 | 0.336 |
| GENE_A_16_P58276680 | 152 | 22 | 22 | 0.384 |
| GENE_A_16_P41429496 | 149 | 21 | 21 | 0.376 |
| GENE_A_16_P03581529 | 160 | 24 | 24 | 0.404 |
| GENE_A_16_P03597472 | 150 | 18 | 18 | 0.378 |
| GENE_A_16_P21197100 | 159 | 23 | 23 | 0.401 |
| GENE_A_18_P13874770 | 155 | 24 | 24 | 0.391 |
| GENE_A_16_P58295031 | 129 | 14 | 14 | 0.325 |
| GENE_A_16_P21237554 | 147 | 21 | 21 | 0.371 |
| GENE_A_16_P41448552 | 136 | 17 | 17 | 0.343 |
| GENE_A_16_P41459430 | 140 | 16 | 16 | 0.353 |
| GENE_A_16_P03579676 | 159 | 21 | 22 | 0.400 |
| GENE_A_16_P21229490 | 156 | 20 | 20 | 0.393 |
| GENE_A_16_P58261611 | 130 | 21 | 21 | 0.327 |
| GENE_A_16_P58268529 | 146 | 17 | 17 | 0.368 |
| GENE_A_16_P41449806 | 149 | 18 | 19 | 0.375 |
| GENE_A_16_P58268023 | 153 | 17 | 19 | 0.385 |
| GENE_A_16_P21197991 | 161 | 21 | 21 | 0.405 |
| GENE_A_18_P13910078 | 145 | 21 | 21 | 0.365 |
| GENE_A_18_P13916552 | 161 | 20 | 20 | 0.405 |
| GENE_A_18_P13904282 | 169 | 20 | 21 | 0.425 |
| GENE_A_16_P21257445 | 142 | 18 | 18 | 0.357 |



|                     |     |    |    |       |
|---------------------|-----|----|----|-------|
| GENE_A_16_P03575950 | 146 | 21 | 21 | 0.367 |
| GENE_A_16_P58304378 | 163 | 22 | 22 | 0.410 |
| GENE_A_16_P58280087 | 143 | 17 | 17 | 0.359 |
| GENE_A_16_P58303806 | 152 | 19 | 19 | 0.382 |
| GENE_A_16_P03589267 | 139 | 19 | 19 | 0.349 |
| GENE_A_16_P58268506 | 156 | 23 | 24 | 0.392 |
| GENE_A_16_P21231186 | 150 | 18 | 18 | 0.377 |
| GENE_A_16_P58293819 | 148 | 21 | 21 | 0.372 |
| GENE_A_16_P58271623 | 141 | 17 | 17 | 0.354 |
| GENE_A_16_P21221847 | 158 | 19 | 19 | 0.397 |
| GENE_A_16_P21244232 | 146 | 19 | 20 | 0.366 |
| GENE_A_16_P41420789 | 142 | 17 | 17 | 0.356 |
| GENE_A_18_P13872415 | 135 | 18 | 18 | 0.339 |
| GENE_A_16_P03564797 | 147 | 18 | 18 | 0.369 |
| GENE_A_16_P58282658 | 142 | 24 | 24 | 0.356 |
| GENE_A_16_P21214926 | 158 | 21 | 21 | 0.396 |
| GENE_A_16_P03596226 | 167 | 18 | 18 | 0.419 |
| GENE_A_16_P58295326 | 158 | 22 | 22 | 0.396 |
| GENE_A_16_P41443368 | 178 | 25 | 25 | 0.446 |
| GENE_A_16_P21210891 | 145 | 18 | 19 | 0.363 |
| GENE_A_16_P58298983 | 157 | 20 | 20 | 0.393 |
| GENE_A_16_P41431239 | 135 | 19 | 19 | 0.338 |
| GENE_A_18_P22485831 | 162 | 22 | 22 | 0.406 |
| GENE_A_16_P58281894 | 177 | 24 | 24 | 0.443 |
| GENE_A_16_P58299389 | 148 | 22 | 22 | 0.371 |
| GENE_A_16_P58306921 | 156 | 22 | 23 | 0.391 |
| GENE_A_16_P03572133 | 154 | 14 | 14 | 0.385 |
| GENE_A_16_P21220119 | 167 | 18 | 18 | 0.418 |
| GENE_A_16_P41406842 | 141 | 16 | 16 | 0.353 |
| GENE_A_16_P41444656 | 141 | 16 | 16 | 0.353 |
| GENE_A_16_P21240087 | 160 | 19 | 20 | 0.400 |
| GENE_A_16_P03573884 | 172 | 22 | 22 | 0.430 |
| GENE_A_16_P58273535 | 147 | 18 | 18 | 0.368 |
| GENE_A_16_P21198414 | 160 | 21 | 22 | 0.400 |
| GENE_A_16_P58289912 | 154 | 20 | 20 | 0.385 |
| GENE_A_16_P21211838 | 142 | 17 | 17 | 0.355 |
| GENE_A_16_P03583708 | 160 | 19 | 19 | 0.399 |
| GENE_A_16_P58274200 | 166 | 21 | 21 | 0.414 |
| GENE_A_16_P21226713 | 132 | 19 | 19 | 0.329 |
| GENE_A_16_P41433237 | 152 | 16 | 16 | 0.379 |
| GENE_A_16_P41446085 | 159 | 20 | 20 | 0.397 |
| GENE_A_16_P03568275 | 166 | 21 | 21 | 0.414 |
| GENE_A_16_P41396466 | 163 | 21 | 21 | 0.407 |
| GENE_A_16_P21211590 | 158 | 20 | 20 | 0.394 |
| GENE_A_16_P21200909 | 167 | 22 | 22 | 0.416 |
| GENE_A_16_P58293098 | 140 | 19 | 19 | 0.349 |

|                     |     |    |    |       |
|---------------------|-----|----|----|-------|
| GENE_A_16_P21205180 | 137 | 20 | 20 | 0.341 |
| GENE_A_16_P21220702 | 157 | 17 | 17 | 0.391 |
| GENE_A_16_P21239076 | 153 | 22 | 22 | 0.381 |
| GENE_A_18_P13926118 | 180 | 20 | 20 | 0.448 |
| GENE_A_16_P34779847 | 149 | 19 | 20 | 0.371 |
| GENE_A_16_P58278187 | 136 | 14 | 14 | 0.338 |
| GENE_A_16_P21227195 | 170 | 21 | 21 | 0.423 |
| GENE_A_16_P41454063 | 152 | 20 | 20 | 0.378 |
| GENE_A_16_P58269464 | 128 | 16 | 16 | 0.318 |
| GENE_A_16_P21221381 | 156 | 21 | 22 | 0.388 |
| GENE_A_16_P41404033 | 157 | 18 | 18 | 0.390 |
| GENE_A_16_P03558031 | 156 | 20 | 21 | 0.388 |
| GENE_A_16_P21233249 | 164 | 21 | 21 | 0.407 |
| GENE_A_16_P41393928 | 145 | 15 | 15 | 0.360 |
| GENE_A_16_P34808019 | 134 | 19 | 19 | 0.333 |
| GENE_A_16_P41445302 | 176 | 23 | 23 | 0.437 |
| GENE_A_16_P21226542 | 154 | 23 | 23 | 0.382 |
| GENE_A_16_P58265417 | 148 | 17 | 17 | 0.368 |
| GENE_A_16_P58305291 | 138 | 16 | 16 | 0.343 |
| GENE_A_16_P58276337 | 150 | 18 | 18 | 0.372 |
| GENE_A_16_P21223807 | 155 | 21 | 21 | 0.385 |
| GENE_A_16_P03591574 | 167 | 24 | 24 | 0.415 |
| GENE_A_16_P58271040 | 150 | 23 | 23 | 0.372 |
| GENE_A_16_P03555027 | 157 | 20 | 20 | 0.390 |
| GENE_A_16_P03572648 | 134 | 18 | 18 | 0.333 |
| GENE_A_16_P03582516 | 171 | 26 | 27 | 0.424 |
| GENE_A_16_P41414134 | 153 | 19 | 19 | 0.380 |
| GENE_A_16_P58269773 | 140 | 19 | 19 | 0.347 |
| GENE_A_16_P03590546 | 145 | 16 | 17 | 0.360 |
| GENE_A_16_P58297671 | 177 | 23 | 23 | 0.439 |
| GENE_A_16_P03573120 | 155 | 18 | 18 | 0.384 |
| GENE_A_16_P21193575 | 170 | 19 | 19 | 0.421 |
| GENE_A_16_P21242108 | 162 | 20 | 20 | 0.402 |
| GENE_A_16_P58282680 | 151 | 20 | 20 | 0.374 |
| GENE_A_16_P58275460 | 147 | 19 | 19 | 0.364 |
| GENE_A_16_P21231398 | 144 | 18 | 18 | 0.357 |
| GENE_A_16_P58296870 | 138 | 12 | 12 | 0.342 |
| GENE_A_16_P21242053 | 157 | 16 | 16 | 0.389 |
| GENE_A_16_P58294924 | 142 | 18 | 18 | 0.352 |
| GENE_A_16_P41398166 | 133 | 18 | 18 | 0.329 |
| GENE_A_16_P03550895 | 136 | 16 | 16 | 0.337 |
| GENE_A_16_P58287887 | 153 | 16 | 16 | 0.379 |
| GENE_A_16_P58268973 | 143 | 18 | 18 | 0.354 |
| GENE_A_16_P41462527 | 150 | 20 | 20 | 0.371 |
| GENE_A_18_P13921433 | 148 | 20 | 20 | 0.366 |
| GENE_A_16_P21208143 | 134 | 19 | 19 | 0.331 |

|                     |     |    |    |       |
|---------------------|-----|----|----|-------|
| GENE_A_16_P58294883 | 172 | 22 | 22 | 0.425 |
| GENE_A_16_P58294471 | 146 | 20 | 20 | 0.361 |
| GENE_A_16_P03580532 | 149 | 15 | 15 | 0.368 |
| GENE_A_18_P13864558 | 144 | 18 | 18 | 0.356 |
| GENE_A_18_P13914955 | 157 | 22 | 22 | 0.388 |
| GENE_A_16_P58307772 | 153 | 16 | 16 | 0.378 |
| GENE_A_16_P03552108 | 134 | 20 | 20 | 0.331 |
| GENE_A_16_P21246557 | 142 | 17 | 17 | 0.351 |
| GENE_A_16_P21204315 | 156 | 23 | 23 | 0.385 |
| GENE_A_16_P41451241 | 140 | 19 | 19 | 0.345 |
| GENE_A_16_P21243647 | 141 | 19 | 19 | 0.348 |
| GENE_A_16_P58263393 | 166 | 20 | 20 | 0.409 |
| GENE_A_16_P58279942 | 169 | 18 | 18 | 0.416 |
| GENE_A_18_P22522733 | 194 | 24 | 26 | 0.478 |
| GENE_A_16_P03558628 | 146 | 18 | 18 | 0.360 |
| GENE_A_16_P21220404 | 126 | 16 | 17 | 0.310 |
| GENE_A_16_P58264575 | 150 | 14 | 14 | 0.369 |
| GENE_A_16_P21216384 | 161 | 15 | 15 | 0.397 |
| GENE_A_18_P13867675 | 159 | 23 | 23 | 0.391 |
| GENE_A_16_P21214578 | 144 | 18 | 19 | 0.355 |
| GENE_A_16_P41407544 | 164 | 19 | 19 | 0.404 |
| GENE_A_16_P21221426 | 137 | 15 | 15 | 0.337 |
| GENE_A_16_P21231965 | 161 | 23 | 23 | 0.396 |
| GENE_A_16_P58290616 | 144 | 20 | 20 | 0.354 |
| GENE_A_16_P21221175 | 135 | 20 | 20 | 0.332 |
| GENE_A_16_P58267745 | 153 | 20 | 20 | 0.376 |
| GENE_A_18_P13936833 | 128 | 18 | 18 | 0.315 |
| GENE_A_16_P03554136 | 139 | 18 | 18 | 0.342 |
| GENE_A_16_P21195227 | 153 | 19 | 19 | 0.376 |
| GENE_A_16_P58285189 | 164 | 19 | 20 | 0.403 |
| GENE_A_16_P21258159 | 145 | 16 | 16 | 0.356 |
| GENE_A_16_P21197260 | 165 | 20 | 20 | 0.406 |
| GENE_A_16_P58304024 | 145 | 15 | 15 | 0.356 |
| GENE_A_16_P58297236 | 155 | 23 | 23 | 0.381 |
| GENE_A_16_P58281506 | 151 | 18 | 19 | 0.371 |
| GENE_A_16_P21231084 | 147 | 17 | 17 | 0.361 |
| GENE_A_16_P21200897 | 152 | 17 | 17 | 0.373 |
| GENE_A_16_P03560476 | 144 | 18 | 18 | 0.354 |
| GENE_A_16_P58278195 | 158 | 20 | 21 | 0.388 |
| GENE_A_16_P58262716 | 145 | 15 | 15 | 0.356 |
| GENE_A_16_P58270832 | 154 | 21 | 21 | 0.378 |
| GENE_A_16_P03560366 | 130 | 19 | 19 | 0.319 |
| GENE_A_16_P03573538 | 151 | 21 | 21 | 0.370 |
| GENE_A_18_P22504090 | 153 | 22 | 22 | 0.375 |
| GENE_A_16_P58260150 | 168 | 23 | 23 | 0.412 |
| GENE_A_16_P21214831 | 147 | 19 | 19 | 0.360 |

|                     |     |    |    |       |
|---------------------|-----|----|----|-------|
| GENE_A_16_P41447259 | 154 | 23 | 23 | 0.377 |
| GENE_A_16_P41469255 | 145 | 20 | 20 | 0.355 |
| GENE_A_16_P21206410 | 122 | 20 | 20 | 0.299 |
| GENE_A_18_P13877060 | 156 | 19 | 19 | 0.382 |
| GENE_A_16_P41394529 | 155 | 20 | 20 | 0.379 |
| GENE_A_16_P21270624 | 160 | 21 | 21 | 0.392 |
| GENE_A_16_P58309509 | 114 | 16 | 16 | 0.279 |
| GENE_A_16_P03582184 | 137 | 18 | 18 | 0.335 |
| GENE_A_16_P58285570 | 141 | 19 | 19 | 0.345 |
| GENE_A_16_P21238645 | 161 | 22 | 22 | 0.394 |
| GENE_A_16_P03585815 | 160 | 16 | 17 | 0.391 |
| GENE_A_16_P03580487 | 161 | 18 | 19 | 0.394 |
| GENE_A_16_P58279898 | 169 | 19 | 19 | 0.413 |
| GENE_A_16_P03592485 | 150 | 19 | 19 | 0.367 |
| GENE_A_18_P22555207 | 160 | 22 | 22 | 0.391 |
| GENE_A_16_P58270992 | 159 | 19 | 19 | 0.389 |
| GENE_A_16_P41467565 | 164 | 19 | 19 | 0.401 |
| GENE_A_16_P21246261 | 153 | 26 | 26 | 0.374 |
| GENE_A_16_P58269388 | 149 | 20 | 20 | 0.364 |
| GENE_A_16_P41400299 | 143 | 20 | 20 | 0.349 |
| GENE_A_16_P41410665 | 162 | 22 | 22 | 0.395 |
| GENE_A_16_P21252958 | 157 | 19 | 19 | 0.383 |
| GENE_A_16_P03558299 | 154 | 18 | 18 | 0.376 |
| GENE_A_16_P21207899 | 140 | 19 | 19 | 0.342 |
| GENE_A_16_P58269480 | 155 | 20 | 21 | 0.378 |
| GENE_A_16_P03581750 | 148 | 15 | 15 | 0.361 |
| GENE_A_16_P58271402 | 148 | 16 | 17 | 0.361 |
| GENE_A_16_P58299186 | 156 | 24 | 24 | 0.380 |
| GENE_A_16_P03573937 | 172 | 21 | 21 | 0.419 |
| GENE_A_16_P03580695 | 166 | 22 | 22 | 0.405 |
| GENE_A_16_P21271588 | 148 | 20 | 21 | 0.361 |
| GENE_A_16_P41443495 | 137 | 18 | 18 | 0.334 |
| GENE_A_16_P03595009 | 161 | 22 | 23 | 0.392 |
| GENE_A_16_P21205566 | 131 | 16 | 16 | 0.319 |
| GENE_A_16_P03589237 | 167 | 28 | 28 | 0.406 |
| GENE_A_16_P58298656 | 140 | 19 | 19 | 0.340 |
| GENE_A_16_P58286379 | 157 | 16 | 16 | 0.382 |
| GENE_A_16_P21210512 | 147 | 20 | 20 | 0.357 |
| GENE_A_16_P21235826 | 133 | 17 | 17 | 0.323 |
| GENE_A_16_P41412658 | 139 | 17 | 17 | 0.338 |
| GENE_A_16_P03598310 | 160 | 15 | 15 | 0.389 |
| GENE_A_16_P03564860 | 148 | 18 | 18 | 0.360 |
| GENE_A_16_P58273953 | 171 | 22 | 22 | 0.415 |
| GENE_A_18_P13905355 | 146 | 23 | 23 | 0.355 |
| GENE_A_16_P58292627 | 161 | 15 | 15 | 0.391 |
| GENE_A_16_P03557405 | 158 | 21 | 21 | 0.384 |

|                     |     |    |    |       |
|---------------------|-----|----|----|-------|
| GENE_A_16_P58288969 | 164 | 22 | 23 | 0.398 |
| GENE_A_16_P58299923 | 169 | 23 | 23 | 0.410 |
| GENE_A_16_P03595672 | 175 | 15 | 15 | 0.425 |
| GENE_A_16_P58273402 | 158 | 17 | 17 | 0.383 |
| GENE_A_16_P03577141 | 145 | 18 | 18 | 0.352 |
| GENE_A_16_P21256293 | 133 | 18 | 18 | 0.323 |
| GENE_A_16_P58306607 | 156 | 19 | 19 | 0.379 |
| GENE_A_16_P21197291 | 183 | 24 | 24 | 0.444 |
| GENE_A_18_P13875313 | 140 | 18 | 18 | 0.340 |
| GENE_A_18_P13938222 | 135 | 17 | 17 | 0.327 |
| GENE_A_16_P21239088 | 129 | 15 | 15 | 0.313 |
| GENE_A_16_P58295259 | 147 | 16 | 16 | 0.356 |
| GENE_A_16_P03586857 | 131 | 14 | 14 | 0.317 |
| GENE_A_16_P21262273 | 177 | 25 | 25 | 0.429 |
| GENE_A_16_P03572655 | 154 | 22 | 22 | 0.373 |
| GENE_A_16_P41417453 | 119 | 14 | 14 | 0.288 |
| GENE_A_16_P21262405 | 149 | 21 | 22 | 0.361 |
| GENE_A_16_P41389105 | 158 | 20 | 20 | 0.382 |
| GENE_A_16_P58285187 | 168 | 19 | 19 | 0.407 |
| GENE_A_16_P58272215 | 158 | 18 | 18 | 0.382 |
| GENE_A_16_P58276352 | 133 | 15 | 15 | 0.322 |
| GENE_A_16_P58304674 | 134 | 16 | 16 | 0.324 |
| GENE_A_16_P21197324 | 152 | 21 | 21 | 0.368 |
| GENE_A_18_P22515885 | 136 | 18 | 18 | 0.329 |
| GENE_A_16_P41429538 | 144 | 17 | 17 | 0.348 |
| GENE_A_16_P58271578 | 153 | 15 | 15 | 0.370 |
| GENE_A_18_P22536193 | 140 | 21 | 21 | 0.339 |
| GENE_A_16_P41411500 | 158 | 17 | 17 | 0.382 |
| GENE_A_16_P21205665 | 156 | 20 | 20 | 0.377 |
| GENE_A_16_P41396592 | 141 | 19 | 20 | 0.341 |
| GENE_A_16_P58285760 | 145 | 16 | 16 | 0.350 |
| GENE_A_16_P58278164 | 159 | 19 | 19 | 0.384 |
| GENE_A_16_P58276357 | 151 | 16 | 16 | 0.365 |
| GENE_A_16_P41439686 | 146 | 19 | 20 | 0.353 |
| GENE_A_16_P03587355 | 145 | 16 | 17 | 0.350 |
| GENE_A_16_P21240035 | 141 | 21 | 21 | 0.340 |
| GENE_A_16_P03568673 | 153 | 18 | 18 | 0.369 |
| GENE_A_16_P03570617 | 157 | 17 | 17 | 0.379 |
| GENE_A_16_P03591419 | 142 | 22 | 22 | 0.343 |
| GENE_A_16_P21215070 | 142 | 18 | 18 | 0.343 |
| GENE_A_16_P41445985 | 148 | 14 | 15 | 0.357 |
| GENE_A_16_P58290384 | 133 | 15 | 15 | 0.321 |
| GENE_A_18_P22531144 | 138 | 19 | 19 | 0.333 |
| GENE_A_16_P03586961 | 140 | 10 | 10 | 0.337 |
| GENE_A_16_P58302780 | 162 | 20 | 20 | 0.390 |
| GENE_A_16_P21248693 | 158 | 22 | 22 | 0.381 |

|                     |     |    |    |       |
|---------------------|-----|----|----|-------|
| GENE_A_16_P58306218 | 180 | 21 | 21 | 0.434 |
| GENE_A_16_P58294412 | 165 | 22 | 23 | 0.397 |
| GENE_A_16_P41413986 | 165 | 19 | 19 | 0.397 |
| GENE_A_16_P58298452 | 151 | 16 | 16 | 0.364 |
| GENE_A_16_P41389675 | 137 | 18 | 19 | 0.330 |
| GENE_A_16_P03567109 | 135 | 18 | 18 | 0.325 |
| GENE_A_16_P21220805 | 154 | 19 | 19 | 0.371 |
| GENE_A_16_P58268193 | 127 | 15 | 15 | 0.306 |
| GENE_A_16_P58302122 | 125 | 15 | 15 | 0.301 |
| GENE_A_16_P03575241 | 143 | 19 | 19 | 0.344 |
| GENE_A_16_P41448272 | 160 | 22 | 22 | 0.385 |
| GENE_A_16_P21207768 | 169 | 24 | 24 | 0.407 |
| GENE_A_16_P21268683 | 147 | 21 | 21 | 0.354 |
| GENE_A_18_P13938521 | 154 | 16 | 16 | 0.370 |
| GENE_A_16_P21244031 | 130 | 15 | 15 | 0.313 |
| GENE_A_16_P03554301 | 144 | 17 | 17 | 0.346 |
| GENE_A_16_P21269655 | 167 | 23 | 23 | 0.401 |
| GENE_A_16_P58309271 | 129 | 14 | 14 | 0.310 |
| GENE_A_16_P21243746 | 152 | 18 | 18 | 0.365 |
| GENE_A_16_P58269962 | 138 | 14 | 14 | 0.331 |
| GENE_A_16_P41390127 | 158 | 18 | 18 | 0.379 |
| GENE_A_16_P58305824 | 149 | 21 | 22 | 0.358 |
| GENE_A_16_P58279431 | 170 | 14 | 14 | 0.408 |
| GENE_A_16_P58263787 | 168 | 20 | 21 | 0.403 |
| GENE_A_16_P41449342 | 152 | 14 | 14 | 0.365 |
| GENE_A_16_P58286948 | 152 | 21 | 21 | 0.365 |
| GENE_A_18_P22500183 | 130 | 18 | 18 | 0.312 |
| GENE_A_16_P58301202 | 159 | 20 | 21 | 0.381 |
| GENE_A_16_P58306530 | 167 | 16 | 16 | 0.400 |
| GENE_A_18_P13898920 | 136 | 16 | 16 | 0.326 |
| GENE_A_16_P03584659 | 138 | 17 | 17 | 0.331 |
| GENE_A_16_P58280651 | 162 | 19 | 19 | 0.388 |
| GENE_A_16_P21230312 | 155 | 19 | 20 | 0.371 |
| GENE_A_16_P21212535 | 173 | 21 | 21 | 0.414 |
| GENE_A_16_P03592152 | 147 | 19 | 19 | 0.352 |
| GENE_A_16_P21197052 | 164 | 20 | 20 | 0.393 |
| GENE_A_18_P13868512 | 140 | 19 | 19 | 0.335 |
| GENE_A_16_P58287291 | 136 | 21 | 21 | 0.326 |
| GENE_A_16_P03596641 | 162 | 14 | 14 | 0.388 |
| GENE_A_16_P58301873 | 123 | 15 | 15 | 0.294 |
| GENE_A_16_P21266679 | 141 | 16 | 19 | 0.337 |
| GENE_A_16_P21217217 | 134 | 15 | 15 | 0.320 |
| GENE_A_16_P21221845 | 147 | 20 | 20 | 0.352 |
| GENE_A_16_P58291529 | 141 | 15 | 15 | 0.337 |
| GENE_A_16_P41414509 | 175 | 23 | 23 | 0.418 |
| GENE_A_16_P58295701 | 126 | 18 | 18 | 0.301 |

|                     |     |    |    |       |
|---------------------|-----|----|----|-------|
| GENE_A_16_P41412516 | 134 | 19 | 19 | 0.320 |
| GENE_A_16_P21213849 | 154 | 23 | 23 | 0.368 |
| GENE_A_16_P41437779 | 143 | 17 | 18 | 0.342 |
| GENE_A_18_P13916693 | 154 | 17 | 17 | 0.368 |
| GENE_A_18_P13876489 | 151 | 20 | 20 | 0.361 |
| GENE_A_16_P21217872 | 146 | 19 | 19 | 0.349 |
| GENE_A_16_P58289027 | 146 | 18 | 18 | 0.349 |
| GENE_A_18_P13890008 | 152 | 19 | 19 | 0.363 |
| GENE_A_16_P41406054 | 153 | 18 | 18 | 0.365 |
| GENE_A_16_P41396240 | 142 | 16 | 16 | 0.339 |
| GENE_A_16_P21215686 | 146 | 16 | 16 | 0.348 |
| GENE_A_16_P34819312 | 167 | 23 | 23 | 0.399 |
| GENE_A_16_P21252542 | 155 | 21 | 21 | 0.370 |
| GENE_A_16_P03585661 | 141 | 21 | 21 | 0.336 |
| GENE_A_16_P21222108 | 143 | 14 | 14 | 0.341 |
| GENE_A_16_P41416766 | 158 | 21 | 21 | 0.377 |
| GENE_A_18_P22587163 | 164 | 16 | 16 | 0.391 |
| GENE_A_16_P41393158 | 139 | 15 | 15 | 0.331 |
| GENE_A_16_P58277739 | 135 | 19 | 19 | 0.322 |
| GENE_A_16_P21204090 | 138 | 20 | 20 | 0.329 |
| GENE_A_16_P03580473 | 158 | 18 | 18 | 0.377 |
| GENE_A_16_P58267085 | 176 | 22 | 22 | 0.420 |
| GENE_A_18_P22575808 | 160 | 17 | 18 | 0.381 |
| GENE_A_18_P22603243 | 152 | 21 | 21 | 0.362 |
| GENE_A_16_P41398063 | 144 | 16 | 17 | 0.343 |
| GENE_A_16_P58294483 | 124 | 15 | 15 | 0.295 |
| GENE_A_16_P21255508 | 141 | 17 | 17 | 0.336 |
| GENE_A_14_P104721   | 166 | 22 | 22 | 0.395 |
| GENE_A_16_P58297826 | 139 | 12 | 12 | 0.331 |
| GENE_A_18_P22502015 | 132 | 15 | 15 | 0.314 |
| GENE_A_16_P21256745 | 142 | 19 | 19 | 0.338 |
| GENE_A_18_P13871376 | 158 | 21 | 21 | 0.376 |
| GENE_A_16_P58271291 | 127 | 15 | 15 | 0.302 |
| GENE_A_14_P110524   | 151 | 18 | 18 | 0.359 |
| GENE_A_16_P58292551 | 137 | 16 | 16 | 0.326 |
| GENE_A_16_P03587931 | 157 | 17 | 17 | 0.373 |
| GENE_A_16_P41434341 | 149 | 16 | 16 | 0.354 |
| GENE_A_16_P41403664 | 142 | 16 | 16 | 0.337 |
| GENE_A_18_P13856476 | 140 | 18 | 19 | 0.333 |
| GENE_A_18_P13856324 | 138 | 18 | 18 | 0.328 |
| GENE_A_16_P03572757 | 136 | 16 | 16 | 0.323 |
| GENE_A_16_P58277867 | 158 | 19 | 19 | 0.375 |
| GENE_A_16_P58266574 | 146 | 19 | 19 | 0.346 |
| GENE_A_16_P58287272 | 146 | 16 | 16 | 0.346 |
| GENE_A_16_P21214276 | 138 | 16 | 16 | 0.327 |
| GENE_A_18_P13857061 | 149 | 19 | 20 | 0.353 |

|                     |     |    |    |       |
|---------------------|-----|----|----|-------|
| GENE_A_18_P13938870 | 148 | 17 | 17 | 0.351 |
| GENE_A_16_P21260529 | 154 | 16 | 17 | 0.365 |
| GENE_A_16_P58283649 | 143 | 12 | 12 | 0.339 |
| GENE_A_16_P58284071 | 136 | 24 | 25 | 0.322 |
| GENE_A_18_P13925416 | 157 | 19 | 19 | 0.372 |
| GENE_A_16_P58265179 | 152 | 20 | 20 | 0.360 |
| GENE_A_16_P21214072 | 153 | 20 | 20 | 0.362 |
| GENE_A_16_P58274929 | 134 | 17 | 17 | 0.317 |
| GENE_A_16_P58262471 | 151 | 15 | 15 | 0.358 |
| GENE_A_18_P22584558 | 163 | 21 | 21 | 0.386 |
| GENE_A_16_P21205412 | 157 | 21 | 21 | 0.372 |
| GENE_A_16_P58298018 | 146 | 20 | 20 | 0.346 |
| GENE_A_16_P58277006 | 161 | 22 | 22 | 0.381 |
| GENE_A_16_P58261848 | 132 | 17 | 17 | 0.312 |
| GENE_A_16_P21220979 | 145 | 19 | 19 | 0.343 |
| GENE_A_16_P21257809 | 154 | 18 | 19 | 0.364 |
| GENE_A_16_P58304359 | 162 | 18 | 19 | 0.383 |
| GENE_A_18_P13881338 | 127 | 16 | 17 | 0.300 |
| GENE_A_16_P58279396 | 138 | 15 | 16 | 0.326 |
| GENE_A_16_P58300142 | 160 | 18 | 18 | 0.378 |
| GENE_A_16_P58264522 | 166 | 23 | 23 | 0.392 |
| GENE_A_16_P41392448 | 150 | 18 | 18 | 0.354 |
| GENE_A_16_P03597299 | 166 | 22 | 22 | 0.392 |
| GENE_A_16_P41425688 | 149 | 19 | 19 | 0.352 |
| GENE_A_16_P58286807 | 136 | 18 | 19 | 0.321 |
| GENE_A_16_P55114876 | 150 | 19 | 19 | 0.354 |
| GENE_A_16_P58272133 | 179 | 21 | 21 | 0.422 |
| GENE_A_16_P21226553 | 133 | 17 | 17 | 0.314 |
| GENE_A_16_P21201087 | 143 | 18 | 18 | 0.337 |
| GENE_A_16_P03590282 | 162 | 19 | 19 | 0.382 |
| GENE_A_18_P13925487 | 161 | 18 | 18 | 0.380 |
| GENE_A_16_P03594012 | 140 | 15 | 15 | 0.330 |
| GENE_A_16_P41412949 | 152 | 20 | 20 | 0.358 |
| GENE_A_16_P21193305 | 171 | 19 | 19 | 0.403 |
| GENE_A_18_P22581359 | 161 | 23 | 23 | 0.379 |
| GENE_A_18_P22550519 | 175 | 20 | 20 | 0.412 |
| GENE_A_16_P58263464 | 150 | 19 | 19 | 0.353 |
| GENE_A_16_P41460386 | 137 | 16 | 17 | 0.323 |
| GENE_A_16_P21245782 | 126 | 16 | 16 | 0.297 |
| GENE_A_16_P34778028 | 137 | 17 | 18 | 0.322 |
| GENE_A_16_P21209315 | 157 | 24 | 24 | 0.369 |
| GENE_A_16_P41450223 | 126 | 16 | 16 | 0.296 |
| GENE_A_16_P03556704 | 129 | 15 | 16 | 0.303 |
| GENE_A_16_P41399149 | 152 | 20 | 20 | 0.357 |
| GENE_A_16_P03598303 | 167 | 21 | 22 | 0.392 |
| GENE_A_18_P13944080 | 138 | 18 | 18 | 0.324 |



|                     |     |    |    |       |
|---------------------|-----|----|----|-------|
| GENE_A_16_P41456459 | 148 | 16 | 16 | 0.348 |
| GENE_A_16_P58308467 | 151 | 17 | 18 | 0.355 |
| GENE_A_16_P41401992 | 157 | 24 | 24 | 0.369 |
| GENE_A_16_P21217526 | 152 | 18 | 18 | 0.357 |
| GENE_A_16_P58305630 | 128 | 14 | 14 | 0.301 |
| GENE_A_18_P22568772 | 152 | 15 | 15 | 0.357 |
| GENE_A_18_P13855650 | 138 | 16 | 16 | 0.324 |
| GENE_A_16_P41418790 | 173 | 21 | 21 | 0.406 |
| GENE_A_16_P58304025 | 161 | 21 | 22 | 0.378 |
| GENE_A_16_P21205718 | 148 | 16 | 18 | 0.347 |
| GENE_A_16_P21192980 | 155 | 20 | 22 | 0.364 |
| GENE_A_18_P22593126 | 144 | 17 | 17 | 0.338 |
| GENE_A_16_P03574547 | 167 | 20 | 21 | 0.392 |
| GENE_A_16_P41410472 | 151 | 16 | 16 | 0.354 |
| GENE_A_16_P03596031 | 148 | 15 | 16 | 0.347 |
| GENE_A_16_P58268932 | 167 | 22 | 23 | 0.391 |
| GENE_A_16_P03592772 | 146 | 20 | 20 | 0.342 |
| GENE_A_16_P21216394 | 135 | 13 | 15 | 0.316 |
| GENE_A_16_P03575914 | 159 | 21 | 21 | 0.373 |
| GENE_A_16_P03594489 | 163 | 20 | 20 | 0.382 |
| GENE_A_18_P13914067 | 165 | 18 | 19 | 0.387 |
| GENE_A_16_P21204928 | 148 | 18 | 18 | 0.347 |
| GENE_A_16_P03592966 | 138 | 18 | 18 | 0.323 |
| GENE_A_18_P13901200 | 146 | 17 | 17 | 0.342 |
| GENE_A_18_P13890426 | 141 | 16 | 17 | 0.330 |
| GENE_A_16_P41433398 | 157 | 20 | 20 | 0.368 |
| GENE_A_16_P34805453 | 143 | 14 | 15 | 0.335 |
| GENE_A_16_P58286411 | 156 | 16 | 16 | 0.365 |
| GENE_A_16_P58260003 | 130 | 16 | 16 | 0.304 |
| GENE_A_18_P13905063 | 156 | 21 | 22 | 0.365 |
| GENE_A_16_P58261208 | 146 | 20 | 20 | 0.341 |
| GENE_A_16_P21217567 | 154 | 19 | 19 | 0.360 |
| GENE_A_16_P58289782 | 133 | 13 | 13 | 0.311 |
| GENE_A_16_P03597506 | 179 | 22 | 22 | 0.418 |
| GENE_A_16_P58282825 | 170 | 22 | 22 | 0.397 |
| GENE_A_16_P03556312 | 150 | 19 | 19 | 0.350 |
| GENE_A_16_P21259333 | 155 | 20 | 20 | 0.362 |
| GENE_A_16_P58302149 | 150 | 18 | 18 | 0.350 |
| GENE_A_16_P21233725 | 131 | 14 | 14 | 0.306 |
| GENE_A_16_P58266827 | 149 | 14 | 14 | 0.348 |
| GENE_A_16_P03587273 | 166 | 26 | 27 | 0.387 |
| GENE_A_16_P41403996 | 164 | 23 | 23 | 0.383 |
| GENE_A_16_P58291081 | 167 | 20 | 20 | 0.390 |
| GENE_A_16_P58269467 | 134 | 14 | 14 | 0.313 |
| GENE_A_18_P22576885 | 147 | 20 | 20 | 0.343 |
| GENE_A_16_P21246169 | 134 | 15 | 15 | 0.313 |

|                     |     |    |    |       |
|---------------------|-----|----|----|-------|
| GENE_A_16_P58299167 | 156 | 23 | 23 | 0.364 |
| GENE_A_14_P105919   | 156 | 23 | 23 | 0.364 |
| GENE_A_16_P58262961 | 167 | 16 | 16 | 0.389 |
| GENE_A_16_P58277111 | 150 | 17 | 17 | 0.350 |
| GENE_A_18_P13871146 | 155 | 18 | 18 | 0.361 |
| GENE_A_16_P03577853 | 142 | 17 | 17 | 0.331 |
| GENE_A_14_P103534   | 145 | 14 | 14 | 0.338 |
| GENE_A_16_P21201568 | 161 | 21 | 21 | 0.375 |
| GENE_A_16_P41402421 | 169 | 20 | 21 | 0.394 |
| GENE_A_16_P41429648 | 156 | 16 | 16 | 0.363 |
| GENE_A_16_P41416864 | 138 | 18 | 18 | 0.322 |
| GENE_A_16_P03587366 | 127 | 10 | 10 | 0.296 |
| GENE_A_16_P58305717 | 151 | 21 | 21 | 0.352 |
| GENE_A_18_P13872534 | 160 | 20 | 20 | 0.373 |
| GENE_A_18_P13885305 | 130 | 14 | 14 | 0.303 |
| GENE_A_16_P21192599 | 142 | 18 | 18 | 0.331 |
| GENE_A_16_P21261083 | 138 | 19 | 19 | 0.321 |
| GENE_A_16_P03588428 | 155 | 20 | 20 | 0.361 |
| GENE_A_16_P03575503 | 155 | 18 | 18 | 0.360 |
| GENE_A_16_P21211115 | 137 | 17 | 17 | 0.319 |
| GENE_A_16_P41455846 | 167 | 19 | 19 | 0.388 |
| GENE_A_16_P21230587 | 156 | 18 | 18 | 0.363 |
| GENE_A_16_P03589771 | 143 | 21 | 21 | 0.332 |
| GENE_A_16_P21207758 | 143 | 16 | 16 | 0.332 |
| GENE_A_18_P13869729 | 140 | 16 | 16 | 0.325 |
| GENE_A_16_P21203809 | 167 | 18 | 18 | 0.388 |
| GENE_A_16_P21260655 | 155 | 17 | 17 | 0.360 |
| GENE_A_16_P21229023 | 152 | 18 | 18 | 0.353 |
| GENE_A_16_P58267367 | 146 | 19 | 19 | 0.339 |
| GENE_A_16_P41391328 | 153 | 18 | 18 | 0.355 |
| GENE_A_16_P58305066 | 148 | 20 | 20 | 0.344 |
| GENE_A_16_P21235486 | 137 | 15 | 15 | 0.318 |
| GENE_A_16_P21238678 | 141 | 13 | 13 | 0.327 |
| GENE_A_16_P21189857 | 145 | 16 | 18 | 0.336 |
| GENE_A_16_P41451363 | 136 | 15 | 17 | 0.315 |
| GENE_A_16_P21193165 | 148 | 21 | 21 | 0.343 |
| GENE_A_16_P21232226 | 184 | 23 | 23 | 0.426 |
| GENE_A_16_P21216710 | 170 | 21 | 21 | 0.394 |
| GENE_A_16_P21203096 | 161 | 17 | 17 | 0.373 |
| GENE_A_16_P58290546 | 170 | 23 | 23 | 0.394 |
| GENE_A_16_P03562471 | 143 | 16 | 16 | 0.331 |
| GENE_A_16_P21201308 | 172 | 22 | 22 | 0.398 |
| GENE_A_16_P21205631 | 156 | 20 | 20 | 0.361 |
| GENE_A_16_P03572614 | 146 | 16 | 17 | 0.338 |
| GENE_A_16_P58267652 | 150 | 18 | 18 | 0.347 |
| GENE_A_16_P41401018 | 157 | 17 | 19 | 0.363 |

|                     |     |    |    |       |
|---------------------|-----|----|----|-------|
| GENE_A_18_P13904656 | 147 | 20 | 20 | 0.340 |
| GENE_A_18_P22600191 | 160 | 24 | 24 | 0.370 |
| GENE_A_16_P41417367 | 144 | 18 | 18 | 0.333 |
| GENE_A_16_P21249341 | 150 | 14 | 14 | 0.347 |
| GENE_A_16_P03589472 | 157 | 17 | 17 | 0.363 |
| GENE_A_16_P58296281 | 146 | 15 | 15 | 0.337 |
| GENE_A_16_P21240412 | 148 | 21 | 21 | 0.342 |
| GENE_A_16_P21268994 | 149 | 19 | 20 | 0.344 |
| GENE_A_16_P58283030 | 167 | 25 | 25 | 0.385 |
| GENE_A_18_P13906687 | 172 | 17 | 17 | 0.397 |
| GENE_A_16_P21265800 | 149 | 16 | 16 | 0.344 |
| GENE_A_16_P41391610 | 148 | 17 | 17 | 0.341 |
| GENE_A_16_P21224070 | 159 | 18 | 18 | 0.367 |
| GENE_A_18_P22485544 | 154 | 20 | 20 | 0.355 |
| GENE_A_16_P03589808 | 155 | 22 | 22 | 0.357 |
| GENE_A_16_P21218787 | 163 | 19 | 19 | 0.375 |
| GENE_A_16_P41426298 | 153 | 21 | 21 | 0.352 |
| GENE_A_16_P41425403 | 148 | 17 | 17 | 0.341 |
| GENE_A_16_P58302947 | 146 | 15 | 15 | 0.336 |
| GENE_A_16_P21221662 | 149 | 19 | 19 | 0.343 |
| GENE_A_16_P41461118 | 135 | 13 | 13 | 0.311 |
| GENE_A_16_P58278424 | 157 | 21 | 21 | 0.361 |
| GENE_A_16_P03575653 | 163 | 19 | 19 | 0.375 |
| GENE_A_16_P21256438 | 170 | 22 | 22 | 0.391 |
| GENE_A_16_P58303042 | 182 | 19 | 19 | 0.418 |
| GENE_A_18_P13914023 | 155 | 19 | 20 | 0.356 |
| GENE_A_16_P58297428 | 161 | 18 | 18 | 0.370 |
| GENE_A_16_P58267962 | 165 | 20 | 20 | 0.379 |
| GENE_A_16_P58302088 | 182 | 23 | 23 | 0.418 |
| GENE_A_16_P41394032 | 152 | 18 | 18 | 0.349 |
| GENE_A_16_P21196702 | 175 | 20 | 20 | 0.402 |
| GENE_A_16_P41402407 | 161 | 20 | 20 | 0.370 |
| GENE_A_16_P41426347 | 154 | 19 | 19 | 0.354 |
| GENE_A_16_P41398932 | 169 | 19 | 19 | 0.388 |
| GENE_A_16_P21233148 | 149 | 22 | 22 | 0.342 |
| GENE_A_16_P58264709 | 152 | 15 | 15 | 0.349 |
| GENE_A_16_P58271112 | 167 | 20 | 20 | 0.383 |
| GENE_A_16_P41439282 | 159 | 16 | 16 | 0.365 |
| GENE_A_16_P41398317 | 148 | 19 | 19 | 0.339 |
| GENE_A_16_P21227260 | 158 | 18 | 18 | 0.362 |
| GENE_A_16_P41426970 | 147 | 18 | 19 | 0.337 |
| GENE_A_16_P58274420 | 158 | 16 | 17 | 0.362 |
| GENE_A_18_P13933200 | 126 | 17 | 17 | 0.289 |
| GENE_A_18_P22520130 | 149 | 22 | 22 | 0.341 |
| GENE_A_18_P22599306 | 136 | 16 | 16 | 0.312 |
| GENE_A_16_P03594760 | 167 | 18 | 19 | 0.383 |

|                     |     |    |    |       |
|---------------------|-----|----|----|-------|
| GENE_A_16_P03595844 | 144 | 16 | 17 | 0.330 |
| GENE_A_16_P21239403 | 123 | 16 | 16 | 0.282 |
| GENE_A_18_P13898722 | 151 | 15 | 15 | 0.346 |
| GENE_A_16_P58262145 | 137 | 17 | 17 | 0.314 |
| GENE_A_18_P22554425 | 146 | 17 | 17 | 0.334 |
| GENE_A_16_P03590383 | 149 | 19 | 20 | 0.341 |
| GENE_A_16_P58296596 | 142 | 20 | 20 | 0.325 |
| GENE_A_16_P21249470 | 147 | 22 | 23 | 0.336 |
| GENE_A_16_P58286600 | 174 | 19 | 19 | 0.398 |
| GENE_A_16_P58288676 | 155 | 16 | 16 | 0.354 |
| GENE_A_16_P21260003 | 156 | 17 | 17 | 0.357 |
| GENE_A_16_P21249641 | 144 | 17 | 17 | 0.329 |
| GENE_A_16_P21224511 | 135 | 16 | 17 | 0.309 |
| GENE_A_16_P03555863 | 158 | 20 | 20 | 0.361 |
| GENE_A_16_P03585758 | 125 | 15 | 15 | 0.286 |
| GENE_A_16_P03588421 | 157 | 16 | 16 | 0.359 |
| GENE_A_16_P21214710 | 166 | 21 | 21 | 0.379 |
| GENE_A_16_P58307956 | 147 | 15 | 16 | 0.336 |
| GENE_A_16_P21226708 | 145 | 14 | 15 | 0.331 |
| GENE_A_18_P13887506 | 162 | 19 | 19 | 0.370 |
| GENE_A_16_P21202117 | 167 | 20 | 21 | 0.381 |
| GENE_A_16_P21195529 | 121 | 14 | 14 | 0.276 |
| GENE_A_16_P41410182 | 140 | 19 | 19 | 0.320 |
| GENE_A_18_P13893204 | 150 | 17 | 18 | 0.342 |
| GENE_A_18_P22598169 | 154 | 16 | 16 | 0.352 |
| GENE_A_16_P41387094 | 139 | 20 | 21 | 0.317 |
| GENE_A_16_P21219578 | 156 | 18 | 18 | 0.356 |
| GENE_A_16_P21230951 | 126 | 16 | 16 | 0.288 |
| GENE_A_16_P58280740 | 149 | 16 | 16 | 0.340 |
| GENE_A_16_P21217718 | 146 | 16 | 16 | 0.333 |
| GENE_A_16_P21242319 | 139 | 18 | 18 | 0.317 |
| GENE_A_16_P21227792 | 155 | 20 | 20 | 0.353 |
| GENE_A_16_P58285167 | 128 | 13 | 13 | 0.292 |
| GENE_A_16_P21196612 | 147 | 21 | 21 | 0.335 |
| GENE_A_16_P21224143 | 149 | 17 | 17 | 0.340 |
| GENE_A_16_P03590290 | 169 | 21 | 21 | 0.385 |
| GENE_A_16_P58293401 | 154 | 18 | 18 | 0.351 |
| GENE_A_16_P58274421 | 142 | 15 | 15 | 0.323 |
| GENE_A_16_P58281578 | 135 | 16 | 16 | 0.307 |
| GENE_A_18_P13878111 | 149 | 19 | 19 | 0.339 |
| GENE_A_16_P21208506 | 148 | 15 | 16 | 0.337 |
| GENE_A_16_P41392344 | 138 | 17 | 17 | 0.314 |
| GENE_A_16_P21223166 | 139 | 19 | 19 | 0.316 |
| GENE_A_16_P21272461 | 127 | 16 | 18 | 0.289 |
| GENE_A_16_P21203550 | 149 | 21 | 21 | 0.339 |
| GENE_A_16_P21193752 | 139 | 17 | 17 | 0.316 |

|                     |     |    |    |       |
|---------------------|-----|----|----|-------|
| GENE_A_16_P03592397 | 130 | 13 | 13 | 0.295 |
| GENE_A_18_P13863810 | 152 | 17 | 17 | 0.345 |
| GENE_A_16_P21244069 | 160 | 25 | 25 | 0.364 |
| GENE_A_16_P58290974 | 170 | 22 | 22 | 0.386 |
| GENE_A_16_P21194056 | 142 | 18 | 18 | 0.323 |
| GENE_A_16_P21212338 | 156 | 21 | 21 | 0.354 |
| GENE_A_16_P21230953 | 136 | 13 | 13 | 0.309 |
| GENE_A_16_P58273357 | 153 | 18 | 18 | 0.347 |
| GENE_A_16_P03558626 | 174 | 16 | 16 | 0.395 |
| GENE_A_18_P13876157 | 140 | 19 | 19 | 0.318 |
| GENE_A_16_P58279118 | 153 | 17 | 18 | 0.347 |
| GENE_A_16_P58301578 | 151 | 19 | 19 | 0.343 |
| GENE_A_16_P21216520 | 138 | 14 | 14 | 0.313 |
| GENE_A_16_P21210182 | 147 | 14 | 14 | 0.333 |
| GENE_A_16_P41406927 | 129 | 16 | 16 | 0.293 |
| GENE_A_16_P21231308 | 160 | 21 | 21 | 0.363 |
| GENE_A_16_P03583758 | 170 | 15 | 15 | 0.385 |
| GENE_A_16_P58297641 | 146 | 19 | 19 | 0.331 |
| GENE_A_18_P13897959 | 167 | 20 | 20 | 0.378 |
| GENE_A_16_P58272735 | 145 | 17 | 17 | 0.329 |
| GENE_A_16_P03553980 | 165 | 18 | 18 | 0.374 |
| GENE_A_16_P21228887 | 149 | 19 | 19 | 0.338 |
| GENE_A_16_P41436064 | 144 | 20 | 20 | 0.326 |
| GENE_A_16_P03585100 | 153 | 19 | 19 | 0.346 |
| GENE_A_18_P22530530 | 148 | 17 | 17 | 0.335 |
| GENE_A_16_P41393256 | 151 | 18 | 18 | 0.342 |
| GENE_A_16_P41440857 | 147 | 20 | 20 | 0.333 |
| GENE_A_16_P03596686 | 137 | 13 | 13 | 0.310 |
| GENE_A_16_P03566214 | 152 | 17 | 17 | 0.344 |
| GENE_A_16_P21266690 | 150 | 18 | 18 | 0.339 |
| GENE_A_16_P58260207 | 152 | 20 | 20 | 0.344 |
| GENE_A_16_P58296625 | 148 | 19 | 19 | 0.335 |
| GENE_A_16_P41396045 | 146 | 15 | 15 | 0.330 |
| GENE_A_16_P21260133 | 158 | 21 | 21 | 0.357 |
| GENE_A_16_P21254193 | 152 | 20 | 20 | 0.344 |
| GENE_A_16_P03577273 | 158 | 15 | 16 | 0.357 |
| GENE_A_16_P58299332 | 129 | 17 | 17 | 0.292 |
| GENE_A_18_P22536002 | 151 | 16 | 16 | 0.341 |
| GENE_A_16_P41423495 | 144 | 16 | 16 | 0.326 |
| GENE_A_16_P41416652 | 155 | 16 | 16 | 0.350 |
| GENE_A_16_P41396480 | 146 | 15 | 15 | 0.330 |
| GENE_A_16_P58273398 | 154 | 18 | 18 | 0.348 |
| GENE_A_16_P03555543 | 152 | 19 | 19 | 0.344 |
| GENE_A_16_P58277995 | 147 | 20 | 20 | 0.332 |
| GENE_A_16_P21258393 | 154 | 18 | 18 | 0.348 |
| GENE_A_18_P13893086 | 153 | 14 | 14 | 0.346 |

|                     |     |    |    |       |
|---------------------|-----|----|----|-------|
| GENE_A_16_P03572482 | 150 | 12 | 12 | 0.339 |
| GENE_A_16_P21202443 | 150 | 18 | 18 | 0.339 |
| GENE_A_16_P58295081 | 153 | 20 | 20 | 0.345 |
| GENE_A_16_P21242314 | 148 | 18 | 18 | 0.334 |
| GENE_A_16_P58272826 | 155 | 18 | 18 | 0.350 |
| GENE_A_16_P58305446 | 132 | 17 | 17 | 0.298 |
| GENE_A_16_P03588580 | 149 | 18 | 20 | 0.336 |
| GENE_A_16_P03551152 | 146 | 19 | 19 | 0.330 |
| GENE_A_16_P58285468 | 147 | 17 | 17 | 0.332 |
| GENE_A_16_P58281679 | 152 | 19 | 20 | 0.343 |
| GENE_A_18_P22487331 | 163 | 23 | 23 | 0.368 |
| GENE_A_16_P21194684 | 150 | 21 | 21 | 0.338 |
| GENE_A_16_P21197140 | 152 | 20 | 21 | 0.342 |
| GENE_A_18_P13918085 | 158 | 18 | 18 | 0.356 |
| GENE_A_16_P55119400 | 140 | 13 | 13 | 0.315 |
| GENE_A_16_P58271378 | 134 | 16 | 16 | 0.302 |
| GENE_A_16_P21221247 | 157 | 20 | 20 | 0.353 |
| GENE_A_16_P21212426 | 133 | 15 | 15 | 0.299 |
| GENE_A_16_P21233588 | 161 | 21 | 21 | 0.362 |
| GENE_A_16_P58278402 | 157 | 18 | 18 | 0.353 |
| GENE_A_18_P13939828 | 164 | 18 | 18 | 0.369 |
| GENE_A_16_P58305712 | 145 | 15 | 15 | 0.326 |
| GENE_A_18_P13858481 | 165 | 20 | 20 | 0.371 |
| GENE_A_16_P03553740 | 168 | 23 | 23 | 0.378 |
| GENE_A_18_P13868075 | 153 | 20 | 21 | 0.344 |
| GENE_A_16_P21263030 | 161 | 21 | 21 | 0.362 |
| GENE_A_16_P21229662 | 142 | 16 | 18 | 0.319 |
| GENE_A_16_P03588129 | 130 | 13 | 14 | 0.292 |
| GENE_A_16_P41411120 | 149 | 18 | 18 | 0.335 |
| GENE_A_16_P41449881 | 142 | 16 | 16 | 0.319 |
| GENE_A_16_P41460279 | 150 | 17 | 17 | 0.337 |
| GENE_A_16_P03570257 | 171 | 20 | 20 | 0.384 |
| GENE_A_16_P58292254 | 163 | 19 | 19 | 0.366 |
| GENE_A_16_P21226677 | 164 | 19 | 19 | 0.368 |
| GENE_A_16_P21250331 | 161 | 18 | 19 | 0.361 |
| GENE_A_16_P58288074 | 156 | 19 | 19 | 0.350 |
| GENE_A_16_P03596511 | 172 | 17 | 17 | 0.386 |
| GENE_A_18_P13940331 | 149 | 16 | 16 | 0.334 |
| GENE_A_16_P58261517 | 148 | 19 | 19 | 0.332 |
| GENE_A_18_P13893456 | 163 | 21 | 21 | 0.366 |
| GENE_A_16_P21197089 | 131 | 18 | 18 | 0.294 |
| GENE_A_16_P03572572 | 139 | 17 | 17 | 0.312 |
| GENE_A_16_P58297500 | 141 | 16 | 16 | 0.316 |
| GENE_A_16_P58305503 | 161 | 23 | 23 | 0.361 |
| GENE_A_16_P03556598 | 156 | 19 | 19 | 0.350 |
| GENE_A_16_P21224137 | 136 | 17 | 17 | 0.305 |

|                     |     |    |    |       |
|---------------------|-----|----|----|-------|
| GENE_A_16_P03585821 | 156 | 17 | 18 | 0.350 |
| GENE_A_16_P41426480 | 166 | 18 | 18 | 0.372 |
| GENE_A_16_P21246200 | 132 | 18 | 18 | 0.296 |
| GENE_A_16_P03580333 | 136 | 17 | 17 | 0.305 |
| GENE_A_16_P03593070 | 151 | 15 | 15 | 0.338 |
| GENE_A_16_P58277680 | 149 | 18 | 18 | 0.334 |
| GENE_A_16_P21209262 | 162 | 20 | 21 | 0.363 |
| GENE_A_18_P13888344 | 161 | 19 | 19 | 0.360 |
| GENE_A_16_P41432671 | 140 | 15 | 15 | 0.313 |
| GENE_A_16_P21253464 | 155 | 21 | 21 | 0.347 |
| GENE_A_16_P58277803 | 154 | 17 | 17 | 0.345 |
| GENE_A_16_P03597800 | 172 | 15 | 16 | 0.385 |
| GENE_A_18_P13898510 | 158 | 19 | 19 | 0.353 |
| GENE_A_18_P13877285 | 145 | 16 | 16 | 0.324 |
| GENE_A_18_P22541558 | 148 | 16 | 16 | 0.331 |
| GENE_A_16_P21250285 | 172 | 21 | 21 | 0.385 |
| GENE_A_16_P21240712 | 169 | 21 | 21 | 0.378 |
| GENE_A_18_P13908664 | 160 | 17 | 18 | 0.358 |
| GENE_A_16_P41442135 | 160 | 19 | 19 | 0.358 |
| GENE_A_16_P03575306 | 142 | 15 | 15 | 0.317 |
| GENE_A_16_P21238078 | 159 | 19 | 19 | 0.355 |
| GENE_A_16_P21197901 | 154 | 18 | 18 | 0.344 |
| GENE_A_16_P21227505 | 143 | 15 | 15 | 0.319 |
| GENE_A_18_P22552974 | 146 | 14 | 14 | 0.326 |
| GENE_A_16_P58290643 | 145 | 17 | 17 | 0.324 |
| GENE_A_16_P03591135 | 144 | 20 | 20 | 0.322 |
| GENE_A_18_P13857890 | 144 | 17 | 17 | 0.322 |
| GENE_A_16_P58274118 | 144 | 17 | 17 | 0.322 |
| GENE_A_18_P13917910 | 153 | 17 | 17 | 0.342 |
| GENE_A_16_P21208381 | 159 | 19 | 19 | 0.355 |
| GENE_A_16_P21207182 | 151 | 20 | 20 | 0.337 |
| GENE_A_16_P41458995 | 140 | 17 | 17 | 0.312 |
| GENE_A_18_P13888392 | 156 | 17 | 17 | 0.348 |
| GENE_A_16_P41391046 | 155 | 17 | 17 | 0.346 |
| GENE_A_16_P58280050 | 146 | 21 | 21 | 0.326 |
| GENE_A_16_P03596284 | 125 | 14 | 14 | 0.279 |
| GENE_A_16_P03574454 | 165 | 20 | 20 | 0.368 |
| GENE_A_16_P34819799 | 176 | 19 | 19 | 0.393 |
| GENE_A_16_P21243653 | 154 | 18 | 18 | 0.344 |
| GENE_A_16_P03595577 | 148 | 16 | 16 | 0.330 |
| GENE_A_16_P21215078 | 135 | 14 | 14 | 0.301 |
| GENE_A_16_P03592547 | 146 | 16 | 16 | 0.326 |
| GENE_A_16_P58309144 | 157 | 22 | 22 | 0.350 |
| GENE_A_16_P58280104 | 153 | 21 | 21 | 0.341 |
| GENE_A_16_P41422139 | 143 | 15 | 15 | 0.319 |
| GENE_A_16_P21197048 | 131 | 13 | 14 | 0.292 |

|                     |     |    |    |       |
|---------------------|-----|----|----|-------|
| GENE_A_16_P03553121 | 132 | 16 | 16 | 0.294 |
| GENE_A_16_P03589197 | 171 | 23 | 23 | 0.381 |
| GENE_A_16_P41430991 | 146 | 17 | 17 | 0.325 |
| GENE_A_18_P13859015 | 171 | 18 | 18 | 0.381 |
| GENE_A_16_P03590924 | 144 | 17 | 18 | 0.321 |
| GENE_A_18_P22558154 | 143 | 15 | 15 | 0.318 |
| GENE_A_16_P58293890 | 157 | 19 | 19 | 0.349 |
| GENE_A_16_P58267929 | 139 | 19 | 19 | 0.309 |
| GENE_A_16_P21205314 | 175 | 19 | 19 | 0.389 |
| GENE_A_16_P21204042 | 165 | 20 | 20 | 0.367 |
| GENE_A_16_P03593234 | 165 | 19 | 19 | 0.367 |
| GENE_A_18_P13905259 | 135 | 14 | 14 | 0.300 |
| GENE_A_16_P58272834 | 162 | 21 | 22 | 0.360 |
| GENE_A_16_P21240976 | 163 | 19 | 19 | 0.362 |
| GENE_A_16_P03584822 | 143 | 17 | 17 | 0.317 |
| GENE_A_16_P03551036 | 159 | 19 | 19 | 0.353 |
| GENE_A_16_P41415362 | 140 | 17 | 17 | 0.311 |
| GENE_A_16_P03578747 | 153 | 23 | 23 | 0.340 |
| GENE_A_16_P03579066 | 162 | 17 | 17 | 0.359 |
| GENE_A_16_P58270588 | 149 | 18 | 18 | 0.331 |
| GENE_A_16_P58276776 | 144 | 16 | 16 | 0.320 |
| GENE_A_16_P41396988 | 188 | 25 | 25 | 0.417 |
| GENE_A_16_P03592161 | 163 | 20 | 20 | 0.362 |
| GENE_A_16_P41457254 | 170 | 22 | 22 | 0.377 |
| GENE_A_16_P21193693 | 158 | 17 | 17 | 0.350 |
| GENE_A_16_P58283918 | 149 | 17 | 17 | 0.330 |
| GENE_A_18_P13886106 | 140 | 15 | 15 | 0.310 |
| GENE_A_16_P03591685 | 156 | 19 | 19 | 0.346 |
| GENE_A_16_P58309403 | 173 | 18 | 18 | 0.383 |
| GENE_A_16_P03589502 | 146 | 15 | 15 | 0.324 |
| GENE_A_16_P21219185 | 163 | 22 | 22 | 0.361 |
| GENE_A_16_P03588801 | 148 | 18 | 18 | 0.328 |
| GENE_A_18_P22550077 | 155 | 16 | 16 | 0.343 |
| GENE_A_18_P13877653 | 142 | 15 | 15 | 0.315 |
| GENE_A_16_P34778299 | 138 | 15 | 15 | 0.306 |
| GENE_A_16_P03583014 | 153 | 19 | 19 | 0.339 |
| GENE_A_16_P58302809 | 153 | 15 | 16 | 0.339 |
| GENE_A_16_P03586390 | 156 | 16 | 17 | 0.345 |
| GENE_A_16_P58276499 | 158 | 19 | 19 | 0.350 |
| GENE_A_16_P58279038 | 154 | 17 | 17 | 0.341 |
| GENE_A_16_P58285510 | 132 | 19 | 19 | 0.292 |
| GENE_A_16_P58283176 | 151 | 16 | 17 | 0.334 |
| GENE_A_16_P21263746 | 140 | 13 | 13 | 0.310 |
| GENE_A_18_P22527564 | 139 | 14 | 14 | 0.307 |
| GENE_A_16_P21219924 | 161 | 20 | 20 | 0.356 |
| GENE_A_18_P13923502 | 150 | 16 | 16 | 0.332 |



|                     |     |    |    |       |
|---------------------|-----|----|----|-------|
| GENE_A_16_P41410658 | 133 | 15 | 15 | 0.294 |
| GENE_A_16_P21236391 | 160 | 16 | 17 | 0.354 |
| GENE_A_16_P58278534 | 175 | 19 | 19 | 0.387 |
| GENE_A_16_P41436793 | 149 | 18 | 18 | 0.329 |
| GENE_A_16_P21194848 | 134 | 15 | 15 | 0.296 |
| GENE_A_16_P03581400 | 158 | 18 | 18 | 0.349 |
| GENE_A_16_P41441764 | 163 | 24 | 24 | 0.360 |
| GENE_A_16_P58304846 | 162 | 19 | 19 | 0.358 |
| GENE_A_18_P22598259 | 161 | 17 | 17 | 0.355 |
| GENE_A_16_P58296197 | 181 | 20 | 20 | 0.400 |
| GENE_A_16_P41456286 | 151 | 22 | 23 | 0.333 |
| GENE_A_16_P41447635 | 147 | 17 | 17 | 0.324 |
| GENE_A_16_P58279285 | 148 | 15 | 17 | 0.327 |
| GENE_A_16_P34774546 | 173 | 25 | 25 | 0.382 |
| GENE_A_16_P58276897 | 150 | 19 | 19 | 0.331 |
| GENE_A_16_P58266665 | 141 | 13 | 14 | 0.311 |
| GENE_A_16_P41463230 | 145 | 19 | 19 | 0.320 |
| GENE_A_16_P21211700 | 163 | 16 | 16 | 0.359 |
| GENE_A_16_P41449876 | 147 | 19 | 19 | 0.324 |
| GENE_A_16_P03555228 | 129 | 15 | 15 | 0.284 |
| GENE_A_16_P58274156 | 163 | 20 | 20 | 0.359 |
| GENE_A_16_P21258135 | 166 | 22 | 22 | 0.366 |
| GENE_A_18_P13876861 | 128 | 13 | 13 | 0.282 |
| GENE_A_16_P21261826 | 133 | 14 | 14 | 0.293 |
| GENE_A_18_P13890533 | 144 | 19 | 19 | 0.317 |
| GENE_A_16_P21232816 | 168 | 18 | 18 | 0.370 |
| GENE_A_16_P58304934 | 148 | 17 | 18 | 0.326 |
| GENE_A_16_P58264556 | 151 | 16 | 16 | 0.332 |
| GENE_A_18_P13910750 | 166 | 22 | 22 | 0.365 |
| GENE_A_16_P03575407 | 154 | 18 | 18 | 0.339 |
| GENE_A_18_P22541164 | 145 | 17 | 17 | 0.319 |
| GENE_A_16_P21270374 | 147 | 19 | 19 | 0.323 |
| GENE_A_16_P21208570 | 152 | 13 | 13 | 0.334 |
| GENE_A_16_P21236987 | 149 | 18 | 18 | 0.328 |
| GENE_A_16_P41394752 | 141 | 19 | 19 | 0.310 |
| GENE_A_16_P03595741 | 155 | 17 | 17 | 0.341 |
| GENE_A_16_P03591150 | 149 | 16 | 16 | 0.328 |
| GENE_A_16_P58281745 | 144 | 16 | 16 | 0.317 |
| GENE_A_16_P41464020 | 140 | 15 | 16 | 0.308 |
| GENE_A_16_P41414024 | 129 | 17 | 17 | 0.284 |
| GENE_A_16_P21240024 | 144 | 16 | 16 | 0.316 |
| GENE_A_16_P41413963 | 138 | 19 | 19 | 0.303 |
| GENE_A_14_P109866   | 151 | 16 | 16 | 0.332 |
| GENE_A_16_P58277713 | 150 | 18 | 19 | 0.329 |
| GENE_A_18_P22576198 | 152 | 17 | 18 | 0.334 |
| GENE_A_16_P58270097 | 141 | 13 | 13 | 0.309 |

|                     |     |    |    |       |
|---------------------|-----|----|----|-------|
| GENE_A_18_P13877180 | 137 | 13 | 13 | 0.301 |
| GENE_A_16_P58268807 | 166 | 20 | 20 | 0.364 |
| GENE_A_16_P41414646 | 154 | 17 | 17 | 0.338 |
| GENE_A_16_P03556176 | 173 | 21 | 21 | 0.379 |
| GENE_A_18_P22481454 | 157 | 17 | 17 | 0.344 |
| GENE_A_16_P03588543 | 130 | 15 | 15 | 0.285 |
| GENE_A_16_P21197084 | 129 | 17 | 17 | 0.283 |
| GENE_A_16_P41409189 | 150 | 16 | 16 | 0.329 |
| GENE_A_16_P58272604 | 145 | 17 | 17 | 0.318 |
| GENE_A_16_P21213637 | 156 | 17 | 17 | 0.342 |
| GENE_A_16_P58279314 | 157 | 18 | 18 | 0.344 |
| GENE_A_16_P41408795 | 141 | 19 | 19 | 0.309 |
| GENE_A_16_P03585249 | 130 | 12 | 12 | 0.285 |
| GENE_A_18_P13872551 | 132 | 13 | 13 | 0.289 |
| GENE_A_16_P58275380 | 144 | 17 | 17 | 0.315 |
| GENE_A_16_P21208979 | 156 | 17 | 17 | 0.342 |
| GENE_A_16_P03589716 | 127 | 14 | 14 | 0.278 |
| GENE_A_16_P21239195 | 162 | 19 | 20 | 0.355 |
| GENE_A_16_P21237444 | 147 | 19 | 19 | 0.322 |
| GENE_A_16_P41427814 | 139 | 14 | 15 | 0.304 |
| GENE_A_18_P22493961 | 154 | 17 | 17 | 0.337 |
| GENE_A_16_P03598032 | 155 | 18 | 18 | 0.339 |
| GENE_A_16_P21196782 | 156 | 19 | 19 | 0.341 |
| GENE_A_16_P58266499 | 142 | 19 | 19 | 0.311 |
| GENE_A_16_P21198226 | 164 | 16 | 16 | 0.359 |
| GENE_A_16_P58287675 | 148 | 12 | 12 | 0.324 |
| GENE_A_16_P58300832 | 134 | 15 | 15 | 0.293 |
| GENE_A_16_P58266703 | 152 | 16 | 16 | 0.332 |
| GENE_A_16_P58307941 | 142 | 16 | 16 | 0.310 |
| GENE_A_16_P34819962 | 136 | 17 | 17 | 0.297 |
| GENE_A_16_P21218847 | 154 | 18 | 18 | 0.337 |
| GENE_A_16_P21229162 | 166 | 16 | 17 | 0.363 |
| GENE_A_16_P58273835 | 129 | 17 | 17 | 0.282 |
| GENE_A_18_P13879334 | 159 | 15 | 15 | 0.347 |
| GENE_A_16_P41437435 | 149 | 15 | 15 | 0.325 |
| GENE_A_16_P21226980 | 146 | 15 | 16 | 0.319 |
| GENE_A_16_P58307216 | 151 | 17 | 17 | 0.330 |
| GENE_A_18_P13914998 | 159 | 14 | 14 | 0.347 |
| GENE_A_16_P41408607 | 133 | 13 | 13 | 0.290 |
| GENE_A_16_P03596010 | 144 | 16 | 16 | 0.314 |
| GENE_A_16_P58290442 | 149 | 19 | 19 | 0.325 |
| GENE_A_16_P03590329 | 152 | 17 | 17 | 0.332 |
| GENE_A_16_P21242013 | 153 | 14 | 14 | 0.334 |
| GENE_A_16_P41408063 | 144 | 18 | 18 | 0.314 |
| GENE_A_18_P22565302 | 143 | 13 | 13 | 0.312 |
| GENE_A_16_P21223453 | 177 | 19 | 19 | 0.386 |

|                     |     |    |    |       |
|---------------------|-----|----|----|-------|
| GENE_A_16_P03588787 | 175 | 18 | 18 | 0.382 |
| GENE_A_18_P13943675 | 142 | 17 | 17 | 0.310 |
| GENE_A_16_P58261251 | 134 | 16 | 17 | 0.292 |
| GENE_A_16_P58270763 | 134 | 14 | 14 | 0.292 |
| GENE_A_16_P21234101 | 162 | 18 | 18 | 0.353 |
| GENE_A_18_P13916376 | 129 | 12 | 12 | 0.281 |
| GENE_A_16_P21248144 | 144 | 17 | 17 | 0.314 |
| GENE_A_16_P03595666 | 175 | 18 | 18 | 0.381 |
| GENE_A_16_P03571822 | 136 | 16 | 16 | 0.296 |
| GENE_A_16_P58295544 | 147 | 17 | 17 | 0.320 |
| GENE_A_16_P03559312 | 161 | 21 | 21 | 0.351 |
| GENE_A_16_P58268201 | 168 | 14 | 14 | 0.366 |
| GENE_A_16_P21214758 | 147 | 17 | 17 | 0.320 |
| GENE_A_16_P03553770 | 137 | 17 | 17 | 0.298 |
| GENE_A_16_P58280012 | 168 | 15 | 15 | 0.366 |
| GENE_A_16_P03578000 | 169 | 20 | 20 | 0.368 |
| GENE_A_16_P58275125 | 138 | 16 | 16 | 0.300 |
| GENE_A_16_P21231891 | 159 | 21 | 21 | 0.346 |
| GENE_A_16_P58291155 | 148 | 18 | 18 | 0.322 |
| GENE_A_16_P58292482 | 143 | 17 | 17 | 0.311 |
| GENE_A_18_P13928348 | 145 | 18 | 18 | 0.315 |
| GENE_A_18_P13867586 | 149 | 20 | 20 | 0.324 |
| GENE_A_16_P58305875 | 144 | 16 | 16 | 0.313 |
| GENE_A_16_P58301720 | 135 | 16 | 16 | 0.293 |
| GENE_A_16_P21204538 | 166 | 20 | 21 | 0.361 |
| GENE_A_16_P41435813 | 157 | 16 | 16 | 0.341 |
| GENE_A_16_P21201503 | 160 | 19 | 19 | 0.348 |
| GENE_A_16_P03584216 | 145 | 19 | 19 | 0.315 |
| GENE_A_16_P21253033 | 150 | 16 | 16 | 0.326 |
| GENE_A_16_P58268476 | 149 | 17 | 17 | 0.324 |
| GENE_A_16_P58295321 | 150 | 16 | 16 | 0.326 |
| GENE_A_16_P41391234 | 150 | 15 | 15 | 0.326 |
| GENE_A_16_P21262097 | 172 | 22 | 22 | 0.373 |
| GENE_A_18_P13920172 | 142 | 18 | 18 | 0.308 |
| GENE_A_16_P41403602 | 128 | 14 | 14 | 0.278 |
| GENE_A_16_P21212527 | 164 | 17 | 17 | 0.356 |
| GENE_A_16_P21262657 | 155 | 18 | 18 | 0.336 |
| GENE_A_16_P03578883 | 129 | 14 | 14 | 0.280 |
| GENE_A_16_P21231987 | 165 | 19 | 19 | 0.358 |
| GENE_A_16_P21217215 | 166 | 20 | 20 | 0.360 |
| GENE_A_18_P22598912 | 155 | 17 | 18 | 0.336 |
| GENE_A_16_P03593487 | 146 | 16 | 17 | 0.316 |
| GENE_A_16_P58301394 | 160 | 18 | 18 | 0.347 |
| GENE_A_16_P21218674 | 160 | 20 | 20 | 0.347 |
| GENE_A_16_P03577934 | 155 | 18 | 18 | 0.336 |
| GENE_A_16_P41453451 | 142 | 14 | 14 | 0.308 |

|                     |     |    |    |       |
|---------------------|-----|----|----|-------|
| GENE_A_16_P58283050 | 154 | 18 | 18 | 0.334 |
| GENE_A_16_P03566478 | 142 | 13 | 13 | 0.308 |
| GENE_A_16_P58294621 | 169 | 19 | 19 | 0.366 |
| GENE_A_16_P58278341 | 158 | 19 | 19 | 0.342 |
| GENE_A_16_P21263557 | 152 | 14 | 14 | 0.329 |
| GENE_A_18_P13895636 | 138 | 17 | 17 | 0.299 |
| GENE_A_16_P03580534 | 137 | 16 | 16 | 0.296 |
| GENE_A_16_P21204098 | 164 | 16 | 16 | 0.355 |
| GENE_A_16_P41457752 | 138 | 18 | 19 | 0.298 |
| GENE_A_16_P58281304 | 156 | 21 | 21 | 0.337 |
| GENE_A_16_P41438750 | 131 | 15 | 15 | 0.283 |
| GENE_A_16_P21243272 | 119 | 13 | 13 | 0.257 |
| GENE_A_18_P22543306 | 152 | 17 | 17 | 0.329 |
| GENE_A_16_P21266234 | 144 | 19 | 19 | 0.311 |
| GENE_A_18_P13860427 | 172 | 20 | 20 | 0.372 |
| GENE_A_16_P21227385 | 129 | 13 | 13 | 0.279 |
| GENE_A_16_P03593132 | 154 | 16 | 16 | 0.333 |
| GENE_A_16_P58261757 | 151 | 17 | 17 | 0.326 |
| GENE_A_16_P34812867 | 155 | 19 | 19 | 0.335 |
| GENE_A_18_P22602960 | 145 | 16 | 16 | 0.313 |
| GENE_A_16_P34767466 | 139 | 15 | 15 | 0.300 |
| GENE_A_16_P58277863 | 154 | 19 | 19 | 0.333 |
| GENE_A_16_P03587087 | 138 | 16 | 16 | 0.298 |
| GENE_A_16_P21219906 | 155 | 20 | 20 | 0.335 |
| GENE_A_16_P58260802 | 168 | 19 | 19 | 0.363 |
| GENE_A_16_P03579183 | 166 | 20 | 20 | 0.358 |
| GENE_A_14_P130577   | 152 | 17 | 17 | 0.328 |
| GENE_A_18_P22567727 | 138 | 15 | 15 | 0.298 |
| GENE_A_16_P58263454 | 167 | 18 | 18 | 0.360 |
| GENE_A_16_P58268243 | 128 | 13 | 14 | 0.276 |
| GENE_A_16_P58260926 | 134 | 17 | 17 | 0.289 |
| GENE_A_16_P21249115 | 170 | 24 | 24 | 0.367 |
| GENE_A_16_P58291518 | 159 | 12 | 13 | 0.343 |
| GENE_A_16_P21201489 | 168 | 21 | 21 | 0.362 |
| GENE_A_16_P03594174 | 146 | 10 | 11 | 0.315 |
| GENE_A_16_P58272207 | 142 | 15 | 15 | 0.306 |
| GENE_A_16_P41391890 | 152 | 21 | 22 | 0.328 |
| GENE_A_16_P21244455 | 154 | 15 | 15 | 0.332 |
| GENE_A_16_P21195172 | 151 | 19 | 19 | 0.325 |
| GENE_A_16_P58308257 | 147 | 16 | 16 | 0.317 |
| GENE_A_16_P21217999 | 146 | 14 | 14 | 0.315 |
| GENE_A_16_P41446516 | 137 | 17 | 17 | 0.295 |
| GENE_A_16_P21255463 | 149 | 18 | 18 | 0.321 |
| GENE_A_18_P13870710 | 166 | 18 | 18 | 0.358 |
| GENE_A_16_P21255388 | 128 | 15 | 15 | 0.276 |
| GENE_A_18_P22596989 | 146 | 16 | 16 | 0.314 |

|                     |     |    |    |       |
|---------------------|-----|----|----|-------|
| GENE_A_16_P58300795 | 150 | 15 | 15 | 0.323 |
| GENE_A_16_P58268579 | 191 | 20 | 20 | 0.411 |
| GENE_A_16_P03591715 | 158 | 20 | 20 | 0.340 |
| GENE_A_16_P58308950 | 166 | 23 | 23 | 0.357 |
| GENE_A_16_P21200136 | 148 | 17 | 17 | 0.318 |
| GENE_A_18_P13924043 | 153 | 17 | 17 | 0.329 |
| GENE_A_16_P34814272 | 148 | 15 | 15 | 0.318 |
| GENE_A_16_P21254865 | 142 | 17 | 18 | 0.305 |
| GENE_A_16_P55111816 | 137 | 18 | 18 | 0.295 |
| GENE_A_16_P58278712 | 144 | 17 | 17 | 0.310 |
| GENE_A_16_P58297392 | 144 | 16 | 16 | 0.310 |
| GENE_A_16_P58274040 | 147 | 17 | 17 | 0.316 |
| GENE_A_16_P34768213 | 144 | 18 | 18 | 0.309 |
| GENE_A_16_P03576514 | 162 | 17 | 17 | 0.348 |
| GENE_A_16_P21213962 | 170 | 18 | 19 | 0.365 |
| GENE_A_16_P41442935 | 142 | 16 | 16 | 0.305 |
| GENE_A_18_P13899592 | 152 | 18 | 18 | 0.327 |
| GENE_A_16_P21272434 | 158 | 16 | 16 | 0.339 |
| GENE_A_16_P41445275 | 160 | 17 | 18 | 0.344 |
| GENE_A_16_P03581810 | 146 | 15 | 15 | 0.314 |
| GENE_A_16_P41437294 | 161 | 19 | 20 | 0.346 |
| GENE_A_18_P13868822 | 160 | 15 | 15 | 0.343 |
| GENE_A_16_P03566908 | 143 | 17 | 17 | 0.307 |
| GENE_A_16_P58299195 | 147 | 14 | 14 | 0.315 |
| GENE_A_16_P58304344 | 155 | 19 | 19 | 0.333 |
| GENE_A_16_P41409262 | 158 | 18 | 18 | 0.339 |
| GENE_A_16_P03595802 | 146 | 19 | 19 | 0.313 |
| GENE_A_18_P22525936 | 139 | 14 | 14 | 0.298 |
| GENE_A_16_P21260929 | 146 | 18 | 18 | 0.313 |
| GENE_A_16_P41450521 | 137 | 14 | 14 | 0.294 |
| GENE_A_16_P21226731 | 157 | 23 | 23 | 0.337 |
| GENE_A_16_P58280565 | 144 | 16 | 16 | 0.309 |
| GENE_A_16_P03581791 | 158 | 18 | 18 | 0.339 |
| GENE_A_16_P41409923 | 173 | 16 | 16 | 0.371 |
| GENE_A_16_P58304284 | 141 | 14 | 14 | 0.302 |
| GENE_A_16_P03594111 | 159 | 17 | 17 | 0.341 |
| GENE_A_16_P41426423 | 157 | 15 | 15 | 0.336 |
| GENE_A_16_P03566923 | 169 | 20 | 20 | 0.362 |
| GENE_A_16_P21212322 | 162 | 17 | 17 | 0.347 |
| GENE_A_16_P03591073 | 184 | 17 | 17 | 0.394 |
| GENE_A_16_P58302626 | 155 | 20 | 20 | 0.332 |
| GENE_A_16_P41415759 | 159 | 21 | 21 | 0.341 |
| GENE_A_16_P41388737 | 165 | 18 | 19 | 0.353 |
| GENE_A_16_P58299654 | 157 | 18 | 18 | 0.336 |
| GENE_A_16_P34784150 | 156 | 16 | 16 | 0.334 |
| GENE_A_16_P58262028 | 123 | 12 | 12 | 0.263 |

|                     |     |    |    |       |
|---------------------|-----|----|----|-------|
| GENE_A_16_P58293828 | 165 | 18 | 18 | 0.353 |
| GENE_A_16_P58265752 | 153 | 19 | 19 | 0.327 |
| GENE_A_16_P03594112 | 162 | 22 | 22 | 0.347 |
| GENE_A_16_P58278764 | 132 | 14 | 14 | 0.282 |
| GENE_A_16_P03595808 | 164 | 17 | 17 | 0.351 |
| GENE_A_16_P58293926 | 145 | 17 | 17 | 0.310 |
| GENE_A_16_P21221610 | 146 | 18 | 18 | 0.312 |
| GENE_A_16_P03552992 | 167 | 18 | 18 | 0.357 |
| GENE_A_16_P03586607 | 131 | 13 | 13 | 0.280 |
| GENE_A_16_P21271879 | 160 | 16 | 16 | 0.342 |
| GENE_A_16_P21245012 | 152 | 16 | 16 | 0.325 |
| GENE_A_16_P21240347 | 158 | 14 | 14 | 0.338 |
| GENE_A_16_P03597735 | 146 | 16 | 16 | 0.312 |
| GENE_A_18_P13935156 | 159 | 20 | 20 | 0.340 |
| GENE_A_18_P13927025 | 155 | 17 | 17 | 0.331 |
| GENE_A_16_P58265306 | 142 | 16 | 16 | 0.303 |
| GENE_A_16_P21214654 | 137 | 17 | 17 | 0.292 |
| GENE_A_16_P21195717 | 153 | 17 | 17 | 0.327 |
| GENE_A_16_P21221447 | 141 | 18 | 18 | 0.301 |
| GENE_A_16_P03552415 | 150 | 18 | 18 | 0.320 |
| GENE_A_16_P03590935 | 148 | 18 | 18 | 0.316 |
| GENE_A_16_P03576449 | 143 | 14 | 14 | 0.305 |
| GENE_A_16_P58266766 | 149 | 18 | 18 | 0.318 |
| GENE_A_16_P03579877 | 168 | 20 | 20 | 0.358 |
| GENE_A_16_P21265023 | 178 | 20 | 20 | 0.379 |
| GENE_A_16_P03591059 | 156 | 13 | 13 | 0.332 |
| GENE_A_16_P03592055 | 142 | 15 | 15 | 0.303 |
| GENE_A_16_P41400099 | 134 | 15 | 15 | 0.286 |
| GENE_A_18_P13867333 | 163 | 18 | 19 | 0.347 |
| GENE_A_16_P58294304 | 157 | 16 | 16 | 0.334 |
| GENE_A_16_P41447797 | 135 | 17 | 18 | 0.288 |
| GENE_A_16_P03591738 | 136 | 14 | 14 | 0.290 |
| GENE_A_16_P21263474 | 150 | 18 | 18 | 0.319 |
| GENE_A_16_P58282960 | 150 | 16 | 16 | 0.319 |
| GENE_A_16_P58283683 | 134 | 14 | 14 | 0.285 |
| GENE_A_18_P13930019 | 147 | 17 | 17 | 0.313 |
| GENE_A_16_P03582499 | 134 | 17 | 18 | 0.285 |
| GENE_A_16_P41431289 | 165 | 18 | 18 | 0.351 |
| GENE_A_18_P22589321 | 157 | 19 | 19 | 0.334 |
| GENE_A_14_P112018   | 132 | 15 | 15 | 0.281 |
| GENE_A_16_P41455458 | 152 | 21 | 21 | 0.323 |
| GENE_A_16_P58275801 | 154 | 15 | 15 | 0.327 |
| GENE_A_16_P58300158 | 142 | 16 | 17 | 0.302 |
| GENE_A_16_P21200774 | 148 | 19 | 19 | 0.314 |
| GENE_A_16_P58272187 | 156 | 18 | 18 | 0.331 |
| GENE_A_16_P41465427 | 149 | 15 | 15 | 0.316 |

|                     |     |    |    |       |
|---------------------|-----|----|----|-------|
| GENE_A_16_P03588814 | 152 | 17 | 17 | 0.323 |
| GENE_A_16_P58279446 | 173 | 20 | 20 | 0.367 |
| GENE_A_16_P58291242 | 158 | 18 | 18 | 0.335 |
| GENE_A_16_P21194105 | 147 | 13 | 13 | 0.312 |
| GENE_A_16_P03569300 | 144 | 17 | 17 | 0.305 |
| GENE_A_16_P58297827 | 143 | 15 | 15 | 0.303 |
| GENE_A_16_P41445745 | 143 | 13 | 13 | 0.303 |
| GENE_A_18_P22582138 | 143 | 15 | 15 | 0.303 |
| GENE_A_16_P03553810 | 140 | 16 | 16 | 0.297 |
| GENE_A_16_P21246748 | 165 | 18 | 18 | 0.350 |
| GENE_A_16_P58278755 | 155 | 18 | 18 | 0.328 |
| GENE_A_16_P21237795 | 151 | 15 | 15 | 0.320 |
| GENE_A_16_P58269617 | 157 | 19 | 19 | 0.333 |
| GENE_A_16_P21223659 | 150 | 18 | 18 | 0.318 |
| GENE_A_16_P41416335 | 152 | 18 | 18 | 0.322 |
| GENE_A_16_P21213289 | 130 | 16 | 16 | 0.275 |
| GENE_A_16_P34797772 | 180 | 19 | 19 | 0.381 |
| GENE_A_16_P41440696 | 162 | 17 | 17 | 0.343 |
| GENE_A_16_P03597178 | 153 | 18 | 18 | 0.324 |
| GENE_A_16_P58285457 | 160 | 17 | 18 | 0.339 |
| GENE_A_16_P58294957 | 135 | 13 | 13 | 0.286 |
| GENE_A_16_P21239099 | 148 | 18 | 18 | 0.313 |
| GENE_A_16_P21259916 | 141 | 13 | 13 | 0.298 |
| GENE_A_16_P21209989 | 139 | 15 | 16 | 0.294 |
| GENE_A_16_P58261699 | 152 | 19 | 19 | 0.321 |
| GENE_A_16_P41395004 | 173 | 20 | 20 | 0.366 |
| GENE_A_16_P21211720 | 149 | 16 | 16 | 0.315 |
| GENE_A_18_P13900868 | 138 | 16 | 16 | 0.292 |
| GENE_A_16_P55109259 | 142 | 20 | 20 | 0.300 |
| GENE_A_16_P03594960 | 139 | 11 | 11 | 0.294 |
| GENE_A_16_P58272556 | 138 | 17 | 18 | 0.292 |
| GENE_A_16_P58276895 | 155 | 16 | 16 | 0.328 |
| GENE_A_16_P21237451 | 152 | 16 | 16 | 0.321 |
| GENE_A_16_P21218159 | 133 | 13 | 13 | 0.281 |
| GENE_A_16_P21201711 | 141 | 15 | 15 | 0.298 |
| GENE_A_16_P03577164 | 158 | 18 | 18 | 0.334 |
| GENE_A_16_P21212840 | 146 | 17 | 18 | 0.308 |
| GENE_A_16_P03571789 | 135 | 17 | 17 | 0.285 |
| GENE_A_16_P58300882 | 158 | 16 | 16 | 0.334 |
| GENE_A_16_P34820844 | 136 | 14 | 14 | 0.287 |
| GENE_A_16_P41430807 | 146 | 15 | 15 | 0.308 |
| GENE_A_16_P21236747 | 141 | 18 | 18 | 0.298 |
| GENE_A_16_P41426590 | 130 | 14 | 14 | 0.275 |
| GENE_A_16_P03582737 | 139 | 13 | 13 | 0.294 |
| GENE_A_16_P21224403 | 148 | 16 | 16 | 0.313 |
| GENE_A_16_P21227098 | 154 | 16 | 16 | 0.325 |

|                     |     |    |    |       |
|---------------------|-----|----|----|-------|
| GENE_A_16_P58303276 | 161 | 16 | 16 | 0.340 |
| GENE_A_16_P58271921 | 137 | 14 | 14 | 0.289 |
| GENE_A_16_P58282876 | 155 | 16 | 17 | 0.327 |
| GENE_A_16_P21245534 | 150 | 19 | 19 | 0.316 |
| GENE_A_16_P58301598 | 176 | 21 | 21 | 0.371 |
| GENE_A_16_P34811673 | 148 | 15 | 15 | 0.312 |
| GENE_A_18_P22550128 | 154 | 16 | 16 | 0.325 |
| GENE_A_16_P58290470 | 153 | 18 | 18 | 0.322 |
| GENE_A_16_P03578406 | 167 | 19 | 19 | 0.352 |
| GENE_A_16_P21193146 | 171 | 19 | 19 | 0.360 |
| GENE_A_16_P41407610 | 173 | 21 | 21 | 0.364 |
| GENE_A_16_P58277590 | 167 | 18 | 18 | 0.352 |
| GENE_A_16_P41389566 | 149 | 12 | 12 | 0.314 |
| GENE_A_16_P21261554 | 141 | 12 | 12 | 0.297 |
| GENE_A_18_P13943946 | 145 | 16 | 16 | 0.305 |
| GENE_A_16_P03591071 | 152 | 16 | 16 | 0.320 |
| GENE_A_16_P58288032 | 153 | 18 | 18 | 0.322 |
| GENE_A_16_P58266670 | 146 | 17 | 17 | 0.307 |
| GENE_A_16_P41451019 | 128 | 17 | 17 | 0.269 |
| GENE_A_16_P21239492 | 148 | 21 | 21 | 0.311 |
| GENE_A_16_P58267216 | 142 | 16 | 16 | 0.298 |
| GENE_A_16_P03591625 | 159 | 19 | 19 | 0.334 |
| GENE_A_18_P22591639 | 151 | 18 | 19 | 0.317 |
| GENE_A_16_P58271947 | 125 | 13 | 13 | 0.263 |
| GENE_A_16_P41402664 | 141 | 16 | 16 | 0.296 |
| GENE_A_16_P21222058 | 153 | 14 | 14 | 0.321 |
| GENE_A_16_P41445691 | 144 | 17 | 17 | 0.302 |
| GENE_A_16_P21234536 | 170 | 20 | 20 | 0.357 |
| GENE_A_16_P58269520 | 161 | 17 | 17 | 0.338 |
| GENE_A_18_P13943120 | 139 | 16 | 16 | 0.292 |
| GENE_A_16_P58270240 | 150 | 16 | 16 | 0.315 |
| GENE_A_16_P21211660 | 150 | 16 | 16 | 0.315 |
| GENE_A_16_P41420592 | 151 | 16 | 16 | 0.317 |
| GENE_A_16_P41429047 | 160 | 16 | 16 | 0.336 |
| GENE_A_16_P21217594 | 139 | 19 | 19 | 0.292 |
| GENE_A_16_P41404448 | 162 | 18 | 18 | 0.340 |
| GENE_A_16_P03557564 | 142 | 15 | 15 | 0.298 |
| GENE_A_16_P03582877 | 156 | 18 | 18 | 0.327 |
| GENE_A_16_P03552540 | 179 | 19 | 20 | 0.376 |
| GENE_A_16_P03575131 | 140 | 16 | 16 | 0.294 |
| GENE_A_16_P41423587 | 144 | 16 | 16 | 0.302 |
| GENE_A_18_P13870830 | 166 | 19 | 19 | 0.348 |
| GENE_A_16_P21237863 | 142 | 14 | 14 | 0.298 |
| GENE_A_16_P21201138 | 161 | 17 | 17 | 0.338 |
| GENE_A_18_P13878092 | 142 | 18 | 18 | 0.298 |
| GENE_A_16_P58292178 | 152 | 16 | 16 | 0.319 |



|                     |     |    |    |       |
|---------------------|-----|----|----|-------|
| GENE_A_16_P58276210 | 175 | 20 | 20 | 0.367 |
| GENE_A_16_P58274843 | 151 | 18 | 18 | 0.317 |
| GENE_A_16_P58280077 | 144 | 16 | 16 | 0.302 |
| GENE_A_18_P13856861 | 156 | 17 | 17 | 0.327 |
| GENE_A_16_P21231716 | 121 | 14 | 14 | 0.253 |
| GENE_A_16_P21249434 | 146 | 13 | 13 | 0.306 |
| GENE_A_16_P58285323 | 153 | 18 | 18 | 0.320 |
| GENE_A_16_P03557432 | 150 | 18 | 18 | 0.314 |
| GENE_A_16_P03574375 | 154 | 18 | 18 | 0.322 |
| GENE_A_16_P21249009 | 152 | 17 | 17 | 0.318 |
| GENE_A_16_P03584626 | 153 | 17 | 17 | 0.320 |
| GENE_A_18_P22549434 | 136 | 16 | 16 | 0.285 |
| GENE_A_16_P58260924 | 153 | 16 | 16 | 0.320 |
| GENE_A_16_P41411506 | 133 | 18 | 18 | 0.278 |
| GENE_A_16_P21250639 | 148 | 19 | 19 | 0.310 |
| GENE_A_16_P03567675 | 148 | 18 | 18 | 0.310 |
| GENE_A_16_P58286582 | 134 | 14 | 14 | 0.280 |
| GENE_A_16_P03553318 | 179 | 20 | 20 | 0.374 |
| GENE_A_18_P22586736 | 149 | 12 | 13 | 0.311 |
| GENE_A_16_P21239949 | 155 | 16 | 16 | 0.324 |
| GENE_A_16_P58269544 | 153 | 19 | 20 | 0.320 |
| GENE_A_16_P03591020 | 144 | 15 | 15 | 0.301 |
| GENE_A_16_P41426463 | 149 | 18 | 18 | 0.311 |
| GENE_A_16_P03579976 | 160 | 20 | 20 | 0.334 |
| GENE_A_16_P21265493 | 145 | 18 | 18 | 0.303 |
| GENE_A_16_P21231455 | 160 | 17 | 17 | 0.334 |
| GENE_A_16_P21259813 | 149 | 20 | 20 | 0.311 |
| GENE_A_16_P03597833 | 160 | 17 | 17 | 0.334 |
| GENE_A_16_P21213933 | 150 | 14 | 14 | 0.313 |
| GENE_A_18_P22583852 | 124 | 14 | 14 | 0.259 |
| GENE_A_16_P58266974 | 167 | 15 | 15 | 0.349 |
| GENE_A_16_P58266343 | 131 | 13 | 14 | 0.274 |
| GENE_A_16_P58307376 | 162 | 19 | 19 | 0.338 |
| GENE_A_16_P03592982 | 169 | 17 | 17 | 0.353 |
| GENE_A_16_P21236941 | 155 | 11 | 11 | 0.324 |
| GENE_A_18_P13862977 | 175 | 18 | 18 | 0.365 |
| GENE_A_16_P03553461 | 162 | 18 | 18 | 0.338 |
| GENE_A_16_P21195101 | 160 | 19 | 19 | 0.334 |
| GENE_A_16_P21196708 | 149 | 13 | 13 | 0.311 |
| GENE_A_16_P41435727 | 152 | 14 | 15 | 0.317 |
| GENE_A_16_P21213067 | 148 | 19 | 19 | 0.309 |
| GENE_A_16_P21209282 | 143 | 17 | 17 | 0.298 |
| GENE_A_18_P22484985 | 153 | 19 | 19 | 0.319 |
| GENE_A_16_P03587787 | 142 | 15 | 15 | 0.296 |
| GENE_A_16_P21248533 | 151 | 15 | 15 | 0.315 |
| GENE_A_16_P21220895 | 157 | 20 | 20 | 0.327 |

|                     |     |    |    |       |
|---------------------|-----|----|----|-------|
| GENE_A_16_P21203485 | 149 | 15 | 15 | 0.310 |
| GENE_A_16_P03573254 | 140 | 18 | 18 | 0.292 |
| GENE_A_16_P58274130 | 155 | 19 | 20 | 0.323 |
| GENE_A_16_P21271886 | 141 | 16 | 16 | 0.294 |
| GENE_A_16_P41411561 | 131 | 14 | 14 | 0.273 |
| GENE_A_16_P21238712 | 181 | 19 | 19 | 0.377 |
| GENE_A_16_P03562240 | 169 | 19 | 19 | 0.352 |
| GENE_A_16_P21196986 | 153 | 17 | 17 | 0.318 |
| GENE_A_16_P21208095 | 167 | 19 | 19 | 0.348 |
| GENE_A_16_P58270931 | 138 | 16 | 16 | 0.287 |
| GENE_A_16_P58302187 | 146 | 15 | 15 | 0.304 |
| GENE_A_16_P58283083 | 171 | 20 | 20 | 0.356 |
| GENE_A_16_P58300029 | 156 | 16 | 17 | 0.325 |
| GENE_A_16_P58268561 | 147 | 16 | 16 | 0.306 |
| GENE_A_18_P22505420 | 147 | 14 | 14 | 0.306 |
| GENE_A_16_P03592425 | 142 | 15 | 15 | 0.295 |
| GENE_A_16_P21234559 | 161 | 16 | 16 | 0.335 |
| GENE_A_18_P13936452 | 158 | 16 | 17 | 0.328 |
| GENE_A_16_P58304574 | 144 | 16 | 17 | 0.299 |
| GENE_A_16_P03581767 | 133 | 14 | 14 | 0.276 |
| GENE_A_16_P03551413 | 145 | 15 | 15 | 0.301 |
| GENE_A_18_P13895970 | 156 | 19 | 19 | 0.324 |
| GENE_A_16_P21218692 | 153 | 15 | 15 | 0.318 |
| GENE_A_18_P13918467 | 142 | 18 | 18 | 0.295 |
| GENE_A_16_P03578247 | 148 | 16 | 16 | 0.307 |
| GENE_A_16_P03573185 | 146 | 16 | 16 | 0.303 |
| GENE_A_16_P21246560 | 139 | 15 | 15 | 0.288 |
| GENE_A_16_P21205440 | 150 | 13 | 13 | 0.311 |
| GENE_A_16_P58260043 | 138 | 12 | 12 | 0.286 |
| GENE_A_18_P13872063 | 143 | 16 | 16 | 0.297 |
| GENE_A_18_P13919417 | 160 | 18 | 18 | 0.332 |
| GENE_A_16_P58299908 | 150 | 16 | 16 | 0.311 |
| GENE_A_16_P03573199 | 159 | 17 | 17 | 0.330 |
| GENE_A_16_P21202169 | 145 | 15 | 15 | 0.301 |
| GENE_A_18_P22537778 | 155 | 13 | 13 | 0.321 |
| GENE_A_16_P03577145 | 135 | 14 | 15 | 0.280 |
| GENE_A_18_P13882243 | 157 | 15 | 15 | 0.325 |
| GENE_A_16_P58270085 | 156 | 17 | 18 | 0.323 |
| GENE_A_16_P41408464 | 150 | 17 | 17 | 0.311 |
| GENE_A_16_P03594388 | 141 | 15 | 15 | 0.292 |
| GENE_A_16_P03592557 | 166 | 18 | 18 | 0.344 |
| GENE_A_16_P58295489 | 156 | 13 | 13 | 0.323 |
| GENE_A_16_P21249584 | 143 | 14 | 14 | 0.296 |
| GENE_A_16_P41426885 | 150 | 15 | 15 | 0.310 |
| GENE_A_16_P41409150 | 136 | 17 | 17 | 0.281 |
| GENE_A_16_P21236036 | 146 | 21 | 21 | 0.302 |

|                     |     |    |    |       |
|---------------------|-----|----|----|-------|
| GENE_A_16_P03595232 | 157 | 13 | 13 | 0.325 |
| GENE_A_16_P21192916 | 155 | 16 | 16 | 0.321 |
| GENE_A_16_P21255426 | 151 | 16 | 16 | 0.312 |
| GENE_A_16_P03597529 | 150 | 16 | 16 | 0.310 |
| GENE_A_16_P41417882 | 147 | 15 | 15 | 0.304 |
| GENE_A_16_P21204578 | 163 | 18 | 18 | 0.337 |
| GENE_A_16_P03587122 | 144 | 15 | 15 | 0.298 |
| GENE_A_16_P58283745 | 142 | 15 | 15 | 0.293 |
| GENE_A_16_P58292266 | 150 | 11 | 11 | 0.310 |
| GENE_A_18_P13873179 | 151 | 20 | 20 | 0.312 |
| GENE_A_16_P21257464 | 162 | 19 | 19 | 0.335 |
| GENE_A_16_P21224367 | 159 | 16 | 16 | 0.328 |
| GENE_A_16_P58265387 | 152 | 17 | 19 | 0.314 |
| GENE_A_16_P21252143 | 157 | 17 | 17 | 0.324 |
| GENE_A_16_P03597810 | 156 | 16 | 16 | 0.322 |
| GENE_A_16_P21249484 | 134 | 12 | 12 | 0.277 |
| GENE_A_16_P21231383 | 152 | 16 | 16 | 0.314 |
| GENE_A_18_P13871055 | 146 | 15 | 15 | 0.301 |
| GENE_A_16_P58287151 | 148 | 13 | 13 | 0.306 |
| GENE_A_16_P58307022 | 165 | 18 | 19 | 0.341 |
| GENE_A_16_P58283395 | 163 | 19 | 19 | 0.336 |
| GENE_A_16_P21262611 | 161 | 9  | 9  | 0.332 |
| GENE_A_16_P03568279 | 164 | 17 | 17 | 0.338 |
| GENE_A_16_P21196645 | 152 | 15 | 16 | 0.314 |
| GENE_A_16_P58307760 | 131 | 11 | 11 | 0.270 |
| GENE_A_16_P34766157 | 148 | 15 | 15 | 0.305 |
| GENE_A_16_P03573114 | 151 | 17 | 17 | 0.311 |
| GENE_A_16_P03568846 | 158 | 16 | 16 | 0.326 |
| GENE_A_16_P03579337 | 155 | 16 | 16 | 0.320 |
| GENE_A_16_P03553246 | 166 | 18 | 18 | 0.342 |
| GENE_A_16_P58283452 | 146 | 17 | 17 | 0.301 |
| GENE_A_16_P58275244 | 148 | 17 | 17 | 0.305 |
| GENE_A_16_P58308457 | 158 | 18 | 18 | 0.326 |
| GENE_A_16_P21259602 | 136 | 14 | 14 | 0.280 |
| GENE_A_16_P41392708 | 146 | 18 | 18 | 0.301 |
| GENE_A_16_P58285212 | 151 | 16 | 16 | 0.311 |
| GENE_A_18_P13922210 | 147 | 16 | 16 | 0.303 |
| GENE_A_18_P13923197 | 143 | 15 | 15 | 0.294 |
| GENE_A_16_P21248190 | 160 | 14 | 15 | 0.329 |
| GENE_A_18_P13922240 | 162 | 17 | 18 | 0.333 |
| GENE_A_16_P03554067 | 138 | 17 | 17 | 0.284 |
| GENE_A_16_P58303896 | 165 | 17 | 18 | 0.339 |
| GENE_A_16_P03557359 | 170 | 20 | 20 | 0.350 |
| GENE_A_16_P41440102 | 144 | 16 | 16 | 0.296 |
| GENE_A_16_P21224784 | 171 | 18 | 18 | 0.352 |
| GENE_A_16_P41461399 | 132 | 16 | 16 | 0.271 |

|                     |     |    |    |       |
|---------------------|-----|----|----|-------|
| GENE_A_18_P22567908 | 155 | 17 | 17 | 0.319 |
| GENE_A_16_P21200039 | 148 | 14 | 14 | 0.304 |
| GENE_A_18_P22572758 | 152 | 18 | 18 | 0.312 |
| GENE_A_16_P21211887 | 149 | 14 | 14 | 0.306 |
| GENE_A_16_P41417244 | 157 | 15 | 15 | 0.322 |
| GENE_A_16_P21268345 | 170 | 14 | 14 | 0.349 |
| GENE_A_16_P21266469 | 179 | 19 | 19 | 0.368 |
| GENE_A_16_P21210881 | 158 | 17 | 17 | 0.324 |
| GENE_A_16_P03588307 | 138 | 15 | 15 | 0.283 |
| GENE_A_16_P03589184 | 154 | 16 | 16 | 0.316 |
| GENE_A_18_P13897733 | 153 | 18 | 18 | 0.314 |
| GENE_A_16_P58265419 | 190 | 21 | 21 | 0.390 |
| GENE_A_16_P41453491 | 154 | 16 | 16 | 0.316 |
| GENE_A_18_P22511989 | 152 | 18 | 18 | 0.312 |
| GENE_A_16_P03562714 | 156 | 17 | 18 | 0.320 |
| GENE_A_16_P03579988 | 162 | 18 | 18 | 0.332 |
| GENE_A_16_P58300874 | 151 | 17 | 17 | 0.310 |
| GENE_A_16_P21245073 | 169 | 16 | 16 | 0.347 |
| GENE_A_18_P22556339 | 151 | 19 | 20 | 0.310 |
| GENE_A_16_P03588533 | 149 | 15 | 15 | 0.306 |
| GENE_A_18_P13929328 | 139 | 11 | 11 | 0.285 |
| GENE_A_18_P22552496 | 164 | 18 | 18 | 0.336 |
| GENE_A_16_P58284149 | 142 | 16 | 16 | 0.291 |
| GENE_A_16_P58291310 | 133 | 11 | 11 | 0.273 |
| GENE_A_16_P21256714 | 175 | 21 | 21 | 0.359 |
| GENE_A_16_P21222208 | 165 | 16 | 16 | 0.338 |
| GENE_A_16_P21227902 | 148 | 17 | 17 | 0.303 |
| GENE_A_16_P58294156 | 173 | 17 | 17 | 0.354 |
| GENE_A_16_P41400991 | 140 | 16 | 16 | 0.287 |
| GENE_A_16_P03590210 | 155 | 11 | 11 | 0.317 |
| GENE_A_16_P58268489 | 133 | 16 | 16 | 0.272 |
| GENE_A_16_P21208535 | 131 | 16 | 16 | 0.268 |
| GENE_A_16_P58288574 | 162 | 15 | 15 | 0.332 |
| GENE_A_16_P58263925 | 141 | 16 | 16 | 0.289 |
| GENE_A_18_P22561004 | 146 | 17 | 17 | 0.299 |
| GENE_A_16_P58276781 | 160 | 18 | 18 | 0.327 |
| GENE_A_16_P03569746 | 136 | 13 | 14 | 0.278 |
| GENE_A_16_P21212112 | 136 | 12 | 12 | 0.278 |
| GENE_A_16_P21226133 | 159 | 17 | 17 | 0.325 |
| GENE_A_16_P21226149 | 144 | 17 | 17 | 0.294 |
| GENE_A_16_P58294661 | 160 | 18 | 18 | 0.327 |
| GENE_A_16_P58285334 | 155 | 19 | 19 | 0.317 |
| GENE_A_16_P41424072 | 177 | 21 | 21 | 0.362 |
| GENE_A_16_P58268542 | 138 | 16 | 16 | 0.282 |
| GENE_A_16_P21206345 | 153 | 16 | 17 | 0.313 |
| GENE_A_16_P41463681 | 147 | 17 | 17 | 0.300 |

|                     |     |    |    |       |
|---------------------|-----|----|----|-------|
| GENE_A_16_P58293989 | 155 | 14 | 14 | 0.317 |
| GENE_A_18_P13899427 | 163 | 19 | 19 | 0.333 |
| GENE_A_16_P03561858 | 127 | 15 | 15 | 0.259 |
| GENE_A_16_P58259865 | 150 | 15 | 15 | 0.306 |
| GENE_A_16_P03596340 | 164 | 14 | 14 | 0.335 |
| GENE_A_16_P03557092 | 160 | 18 | 18 | 0.327 |
| GENE_A_16_P21238976 | 147 | 16 | 16 | 0.300 |
| GENE_A_16_P03556117 | 146 | 15 | 15 | 0.298 |
| GENE_A_18_P13869802 | 168 | 14 | 14 | 0.343 |
| GENE_A_16_P03562953 | 155 | 15 | 15 | 0.316 |
| GENE_A_16_P41405595 | 137 | 14 | 15 | 0.279 |
| GENE_A_16_P21255357 | 153 | 16 | 16 | 0.312 |
| GENE_A_16_P58260613 | 154 | 16 | 16 | 0.314 |
| GENE_A_16_P58288342 | 162 | 19 | 19 | 0.330 |
| GENE_A_16_P21232539 | 165 | 18 | 18 | 0.336 |
| GENE_A_16_P58291186 | 138 | 15 | 15 | 0.281 |
| GENE_A_16_P58259840 | 148 | 15 | 15 | 0.302 |
| GENE_A_18_P22552809 | 154 | 18 | 18 | 0.314 |
| GENE_A_18_P22525949 | 159 | 16 | 16 | 0.324 |
| GENE_A_16_P21245871 | 146 | 17 | 17 | 0.297 |
| GENE_A_16_P58286709 | 137 | 14 | 15 | 0.279 |
| GENE_A_16_P21205044 | 158 | 17 | 17 | 0.322 |
| GENE_A_16_P58285439 | 148 | 16 | 16 | 0.301 |
| GENE_A_16_P58260194 | 157 | 19 | 19 | 0.320 |
| GENE_A_16_P21227116 | 152 | 18 | 18 | 0.310 |
| GENE_A_18_P13918630 | 157 | 16 | 16 | 0.320 |
| GENE_A_16_P41394445 | 152 | 19 | 19 | 0.310 |
| GENE_A_16_P58280337 | 136 | 18 | 18 | 0.277 |
| GENE_A_16_P03572717 | 155 | 17 | 17 | 0.316 |
| GENE_A_16_P03572791 | 171 | 17 | 18 | 0.348 |
| GENE_A_16_P21210414 | 163 | 16 | 16 | 0.332 |
| GENE_A_16_P21223059 | 142 | 14 | 14 | 0.289 |
| GENE_A_16_P21220265 | 166 | 20 | 20 | 0.338 |
| GENE_A_16_P21246056 | 142 | 13 | 13 | 0.289 |
| GENE_A_18_P13885118 | 156 | 17 | 17 | 0.317 |
| GENE_A_18_P13911293 | 160 | 17 | 17 | 0.326 |
| GENE_A_18_P13858484 | 169 | 19 | 19 | 0.344 |
| GENE_A_18_P13927762 | 153 | 12 | 12 | 0.311 |
| GENE_A_16_P41414828 | 138 | 14 | 14 | 0.281 |
| GENE_A_16_P58273667 | 153 | 11 | 12 | 0.311 |
| GENE_A_16_P41395035 | 194 | 19 | 20 | 0.395 |
| GENE_A_16_P03583076 | 164 | 15 | 15 | 0.334 |
| GENE_A_16_P21200994 | 146 | 15 | 15 | 0.297 |
| GENE_A_16_P21221515 | 145 | 16 | 16 | 0.295 |
| GENE_A_16_P41448311 | 163 | 18 | 18 | 0.331 |
| GENE_A_16_P58286332 | 139 | 15 | 15 | 0.283 |

|                     |     |    |    |       |
|---------------------|-----|----|----|-------|
| GENE_A_18_P22560895 | 137 | 13 | 13 | 0.278 |
| GENE_A_16_P58300844 | 136 | 14 | 14 | 0.276 |
| GENE_A_16_P58302258 | 159 | 15 | 16 | 0.323 |
| GENE_A_16_P21201158 | 154 | 16 | 16 | 0.313 |
| GENE_A_16_P03564473 | 141 | 16 | 16 | 0.286 |
| GENE_A_18_P22511969 | 148 | 14 | 14 | 0.300 |
| GENE_A_16_P41421209 | 157 | 14 | 15 | 0.319 |
| GENE_A_16_P21268568 | 136 | 13 | 14 | 0.276 |
| GENE_A_16_P58267179 | 165 | 18 | 18 | 0.335 |
| GENE_A_16_P03582356 | 145 | 14 | 15 | 0.294 |
| GENE_A_16_P21220349 | 154 | 18 | 18 | 0.312 |
| GENE_A_18_P13888988 | 170 | 21 | 21 | 0.345 |
| GENE_A_16_P58266963 | 141 | 14 | 14 | 0.286 |
| GENE_A_18_P13923730 | 153 | 12 | 12 | 0.310 |
| GENE_A_16_P03583588 | 141 | 19 | 19 | 0.286 |
| GENE_A_16_P41414466 | 171 | 16 | 17 | 0.347 |
| GENE_A_16_P03561790 | 160 | 17 | 17 | 0.324 |
| GENE_A_18_P13933770 | 151 | 14 | 14 | 0.306 |
| GENE_A_16_P58270761 | 161 | 18 | 18 | 0.326 |
| GENE_A_16_P03582613 | 157 | 18 | 18 | 0.318 |
| GENE_A_16_P21229150 | 140 | 16 | 16 | 0.284 |
| GENE_A_16_P03562438 | 142 | 16 | 16 | 0.288 |
| GENE_A_16_P58294934 | 164 | 15 | 16 | 0.332 |
| GENE_A_16_P41397890 | 166 | 17 | 17 | 0.336 |
| GENE_A_16_P58288177 | 146 | 18 | 19 | 0.296 |
| GENE_A_16_P03585634 | 155 | 14 | 14 | 0.314 |
| GENE_A_16_P03592181 | 164 | 14 | 16 | 0.332 |
| GENE_A_16_P41390066 | 127 | 15 | 15 | 0.257 |
| GENE_A_18_P22592802 | 136 | 15 | 15 | 0.275 |
| GENE_A_18_P22601092 | 143 | 13 | 13 | 0.290 |
| GENE_A_16_P21259812 | 155 | 15 | 15 | 0.314 |
| GENE_A_16_P58267793 | 147 | 18 | 18 | 0.298 |
| GENE_A_16_P34770019 | 155 | 16 | 16 | 0.314 |
| GENE_A_16_P03578908 | 159 | 17 | 17 | 0.322 |
| GENE_A_16_P03593300 | 147 | 13 | 13 | 0.297 |
| GENE_A_16_P21229495 | 138 | 18 | 18 | 0.279 |
| GENE_A_16_P58305300 | 143 | 15 | 15 | 0.289 |
| GENE_A_16_P41458241 | 166 | 10 | 10 | 0.336 |
| GENE_A_16_P03569620 | 159 | 19 | 20 | 0.322 |
| GENE_A_16_P41423266 | 155 | 17 | 17 | 0.313 |
| GENE_A_16_P03569481 | 154 | 15 | 15 | 0.311 |
| GENE_A_16_P21263712 | 181 | 21 | 21 | 0.366 |
| GENE_A_16_P21203805 | 163 | 18 | 19 | 0.330 |
| GENE_A_16_P21202820 | 158 | 17 | 17 | 0.319 |
| GENE_A_16_P58262049 | 159 | 13 | 13 | 0.321 |
| GENE_A_16_P58271332 | 155 | 15 | 15 | 0.313 |

|                     |     |    |    |       |
|---------------------|-----|----|----|-------|
| GENE_A_16_P03577823 | 134 | 14 | 14 | 0.271 |
| GENE_A_18_P22590859 | 149 | 17 | 17 | 0.301 |
| GENE_A_16_P41388824 | 146 | 16 | 16 | 0.295 |
| GENE_A_16_P58298573 | 129 | 14 | 15 | 0.261 |
| GENE_A_16_P41417233 | 141 | 17 | 17 | 0.285 |
| GENE_A_16_P41432046 | 154 | 13 | 13 | 0.311 |
| GENE_A_18_P13938709 | 177 | 20 | 20 | 0.357 |
| GENE_A_16_P58273302 | 121 | 12 | 12 | 0.244 |
| GENE_A_16_P03567264 | 125 | 15 | 15 | 0.252 |
| GENE_A_16_P21249626 | 130 | 13 | 13 | 0.262 |
| GENE_A_16_P03550816 | 160 | 15 | 16 | 0.323 |
| GENE_A_16_P21254862 | 155 | 17 | 17 | 0.313 |
| GENE_A_16_P41435038 | 149 | 18 | 18 | 0.301 |
| GENE_A_16_P21205150 | 144 | 13 | 13 | 0.290 |
| GENE_A_16_P21203046 | 126 | 9  | 9  | 0.254 |
| GENE_A_16_P21213697 | 129 | 16 | 16 | 0.260 |
| GENE_A_16_P21258498 | 155 | 19 | 20 | 0.313 |
| GENE_A_16_P03556044 | 159 | 16 | 16 | 0.321 |
| GENE_A_16_P58275405 | 172 | 18 | 18 | 0.347 |
| GENE_A_16_P58297819 | 137 | 13 | 13 | 0.276 |
| GENE_A_16_P41428775 | 153 | 17 | 17 | 0.308 |
| GENE_A_16_P21212090 | 157 | 20 | 20 | 0.316 |
| GENE_A_16_P41448573 | 161 | 15 | 16 | 0.324 |
| GENE_A_16_P21257322 | 155 | 17 | 17 | 0.312 |
| GENE_A_16_P34822335 | 162 | 19 | 19 | 0.326 |
| GENE_A_18_P13909216 | 154 | 10 | 10 | 0.310 |
| GENE_A_16_P21214718 | 150 | 15 | 15 | 0.302 |
| GENE_A_16_P41403163 | 165 | 17 | 17 | 0.332 |
| GENE_A_18_P13901120 | 145 | 18 | 18 | 0.292 |
| GENE_A_16_P21210326 | 152 | 18 | 18 | 0.306 |
| GENE_A_16_P21210210 | 150 | 16 | 16 | 0.302 |
| GENE_A_18_P13864015 | 132 | 16 | 16 | 0.266 |
| GENE_A_16_P03593511 | 160 | 18 | 18 | 0.322 |
| GENE_A_16_P58268135 | 149 | 16 | 16 | 0.300 |
| GENE_A_16_P58282648 | 155 | 17 | 17 | 0.312 |
| GENE_A_16_P41423753 | 153 | 15 | 15 | 0.308 |
| GENE_A_16_P21239578 | 146 | 15 | 15 | 0.294 |
| GENE_A_16_P58286134 | 137 | 16 | 16 | 0.276 |
| GENE_A_16_P58263939 | 160 | 16 | 16 | 0.322 |
| GENE_A_16_P21212352 | 162 | 16 | 16 | 0.326 |
| GENE_A_18_P13860015 | 171 | 18 | 18 | 0.344 |
| GENE_A_16_P58273718 | 150 | 16 | 16 | 0.302 |
| GENE_A_16_P21241228 | 172 | 24 | 24 | 0.346 |
| GENE_A_16_P58266833 | 171 | 17 | 17 | 0.344 |
| GENE_A_16_P21232208 | 146 | 13 | 13 | 0.294 |
| GENE_A_16_P21260875 | 162 | 19 | 19 | 0.326 |

|                     |     |    |    |       |
|---------------------|-----|----|----|-------|
| GENE_A_18_P22598923 | 149 | 14 | 14 | 0.299 |
| GENE_A_16_P41444059 | 161 | 18 | 18 | 0.324 |
| GENE_A_18_P13868554 | 138 | 13 | 13 | 0.277 |
| GENE_A_18_P13898247 | 131 | 14 | 14 | 0.263 |
| GENE_A_16_P41385902 | 148 | 16 | 17 | 0.297 |
| GENE_A_16_P58309501 | 138 | 16 | 16 | 0.277 |
| GENE_A_18_P13907362 | 142 | 11 | 11 | 0.285 |
| GENE_A_16_P21247680 | 137 | 15 | 15 | 0.275 |
| GENE_A_16_P21227222 | 143 | 15 | 15 | 0.287 |
| GENE_A_16_P58285233 | 153 | 12 | 12 | 0.307 |
| GENE_A_16_P58297960 | 134 | 13 | 13 | 0.269 |
| GENE_A_16_P41455641 | 135 | 15 | 15 | 0.271 |
| GENE_A_16_P21249896 | 143 | 15 | 15 | 0.287 |
| GENE_A_18_P22530307 | 147 | 14 | 14 | 0.295 |
| GENE_A_16_P21193286 | 136 | 14 | 14 | 0.273 |
| GENE_A_16_P21259212 | 141 | 14 | 14 | 0.283 |
| GENE_A_16_P58286564 | 152 | 14 | 14 | 0.305 |
| GENE_A_18_P13936962 | 163 | 20 | 20 | 0.327 |
| GENE_A_16_P41426372 | 159 | 17 | 17 | 0.319 |
| GENE_A_16_P21215924 | 148 | 15 | 15 | 0.297 |
| GENE_A_16_P58304209 | 134 | 9  | 9  | 0.269 |
| GENE_A_18_P13940598 | 159 | 19 | 19 | 0.319 |
| GENE_A_16_P41454781 | 128 | 14 | 14 | 0.257 |
| GENE_A_16_P58269413 | 119 | 13 | 13 | 0.239 |
| GENE_A_16_P03556337 | 148 | 15 | 15 | 0.297 |
| GENE_A_16_P58271303 | 158 | 19 | 19 | 0.317 |
| GENE_A_16_P21244272 | 148 | 14 | 14 | 0.296 |
| GENE_A_16_P21261236 | 164 | 18 | 18 | 0.328 |
| GENE_A_16_P58272213 | 167 | 19 | 19 | 0.334 |
| GENE_A_16_P58296847 | 168 | 15 | 15 | 0.336 |
| GENE_A_16_P34811062 | 150 | 20 | 20 | 0.300 |
| GENE_A_16_P03578770 | 139 | 15 | 15 | 0.278 |
| GENE_A_18_P13865258 | 154 | 15 | 16 | 0.308 |
| GENE_A_16_P58301745 | 154 | 15 | 16 | 0.308 |
| GENE_A_16_P21226580 | 141 | 11 | 11 | 0.282 |
| GENE_A_16_P21268969 | 156 | 19 | 19 | 0.312 |
| GENE_A_16_P21259376 | 148 | 18 | 18 | 0.296 |
| GENE_A_16_P21259910 | 148 | 16 | 16 | 0.296 |
| GENE_A_16_P58305678 | 154 | 16 | 16 | 0.308 |
| GENE_A_14_P124831   | 158 | 18 | 18 | 0.316 |
| GENE_A_16_P58288846 | 154 | 17 | 17 | 0.308 |
| GENE_A_16_P21207449 | 148 | 14 | 14 | 0.296 |
| GENE_A_16_P03590564 | 160 | 16 | 16 | 0.320 |
| GENE_A_16_P21239969 | 154 | 18 | 18 | 0.308 |
| GENE_A_16_P21240295 | 153 | 16 | 16 | 0.306 |
| GENE_A_16_P21222250 | 147 | 15 | 15 | 0.294 |



|                     |     |    |    |       |
|---------------------|-----|----|----|-------|
| GENE_A_16_P21210573 | 141 | 14 | 14 | 0.282 |
| GENE_A_16_P58290667 | 134 | 11 | 12 | 0.268 |
| GENE_A_16_P58304724 | 145 | 14 | 15 | 0.290 |
| GENE_A_16_P03598044 | 140 | 14 | 14 | 0.280 |
| GENE_A_16_P58301605 | 161 | 13 | 13 | 0.322 |
| GENE_A_18_P13867460 | 129 | 14 | 14 | 0.258 |
| GENE_A_16_P41457647 | 150 | 18 | 18 | 0.300 |
| GENE_A_16_P58283421 | 162 | 13 | 14 | 0.323 |
| GENE_A_16_P21246289 | 148 | 18 | 18 | 0.296 |
| GENE_A_16_P41454091 | 139 | 14 | 14 | 0.278 |
| GENE_A_16_P21233929 | 134 | 14 | 14 | 0.268 |
| GENE_A_16_P58306647 | 166 | 19 | 19 | 0.331 |
| GENE_A_16_P41414059 | 151 | 13 | 14 | 0.301 |
| GENE_A_16_P58260496 | 139 | 17 | 17 | 0.277 |
| GENE_A_18_P13868369 | 140 | 17 | 17 | 0.279 |
| GENE_A_16_P58306487 | 144 | 18 | 18 | 0.287 |
| GENE_A_16_P58297877 | 125 | 13 | 13 | 0.249 |
| GENE_A_16_P21219790 | 147 | 15 | 15 | 0.293 |
| GENE_A_16_P58281889 | 141 | 16 | 16 | 0.281 |
| GENE_A_16_P58266037 | 173 | 20 | 20 | 0.345 |
| GENE_A_16_P21209589 | 147 | 16 | 16 | 0.293 |
| GENE_A_16_P21199839 | 143 | 17 | 17 | 0.285 |
| GENE_A_16_P41409635 | 169 | 14 | 14 | 0.337 |
| GENE_A_18_P13905483 | 144 | 13 | 13 | 0.287 |
| GENE_A_16_P41416319 | 143 | 16 | 16 | 0.285 |
| GENE_A_16_P21244977 | 150 | 17 | 17 | 0.299 |
| GENE_A_16_P58292252 | 151 | 16 | 16 | 0.301 |
| GENE_A_18_P13944040 | 151 | 16 | 16 | 0.301 |
| GENE_A_16_P58300566 | 160 | 18 | 18 | 0.319 |
| GENE_A_16_P03579601 | 138 | 17 | 17 | 0.275 |
| GENE_A_18_P22538585 | 150 | 17 | 17 | 0.298 |
| GENE_A_16_P58262660 | 158 | 17 | 17 | 0.314 |
| GENE_A_16_P21197726 | 145 | 16 | 16 | 0.288 |
| GENE_A_18_P13908856 | 155 | 14 | 14 | 0.308 |
| GENE_A_16_P41455748 | 153 | 17 | 17 | 0.304 |
| GENE_A_16_P58278070 | 144 | 16 | 16 | 0.286 |
| GENE_A_16_P21232292 | 149 | 15 | 16 | 0.296 |
| GENE_A_16_P03580465 | 157 | 16 | 18 | 0.312 |
| GENE_A_16_P03581040 | 148 | 16 | 16 | 0.294 |
| GENE_A_16_P03580828 | 149 | 16 | 16 | 0.296 |
| GENE_A_16_P03593910 | 144 | 14 | 14 | 0.286 |
| GENE_A_16_P03589664 | 164 | 17 | 17 | 0.326 |
| GENE_A_16_P58305227 | 149 | 17 | 17 | 0.296 |
| GENE_A_18_P22543939 | 137 | 15 | 15 | 0.272 |
| GENE_A_16_P41404104 | 144 | 14 | 14 | 0.286 |
| GENE_A_16_P21255709 | 151 | 15 | 15 | 0.300 |

|                     |     |    |    |       |
|---------------------|-----|----|----|-------|
| GENE_A_16_P58276755 | 129 | 15 | 15 | 0.256 |
| GENE_A_16_P58292923 | 157 | 13 | 14 | 0.312 |
| GENE_A_16_P03559584 | 147 | 12 | 12 | 0.292 |
| GENE_A_16_P21228706 | 159 | 16 | 17 | 0.315 |
| GENE_A_16_P03571743 | 155 | 16 | 16 | 0.307 |
| GENE_A_16_P03592819 | 133 | 11 | 11 | 0.264 |
| GENE_A_16_P41410941 | 147 | 17 | 17 | 0.292 |
| GENE_A_16_P58293277 | 146 | 16 | 16 | 0.290 |
| GENE_A_14_P134351   | 154 | 17 | 18 | 0.305 |
| GENE_A_16_P21235805 | 150 | 13 | 13 | 0.297 |
| GENE_A_16_P58290674 | 131 | 12 | 13 | 0.260 |
| GENE_A_16_P41413774 | 147 | 12 | 12 | 0.291 |
| GENE_A_16_P21217721 | 159 | 19 | 19 | 0.315 |
| GENE_A_18_P13929437 | 158 | 14 | 14 | 0.313 |
| GENE_A_16_P03573565 | 150 | 15 | 15 | 0.297 |
| GENE_A_16_P21239440 | 151 | 17 | 17 | 0.299 |
| GENE_A_16_P41417704 | 149 | 16 | 16 | 0.295 |
| GENE_A_16_P03557312 | 169 | 15 | 15 | 0.335 |
| GENE_A_16_P58307686 | 157 | 17 | 17 | 0.311 |
| GENE_A_16_P58267165 | 141 | 15 | 16 | 0.279 |
| GENE_A_16_P03582856 | 142 | 17 | 17 | 0.281 |
| GENE_A_16_P21193963 | 139 | 14 | 14 | 0.275 |
| GENE_A_16_P58283438 | 129 | 13 | 13 | 0.255 |
| GENE_A_16_P21193182 | 151 | 15 | 15 | 0.299 |
| GENE_A_16_P58280620 | 156 | 16 | 16 | 0.309 |
| GENE_A_16_P58290105 | 147 | 17 | 17 | 0.291 |
| GENE_A_16_P21254427 | 148 | 15 | 15 | 0.293 |
| GENE_A_16_P58266806 | 148 | 14 | 14 | 0.293 |
| GENE_A_16_P03589053 | 138 | 12 | 12 | 0.273 |
| GENE_A_16_P58269487 | 152 | 16 | 16 | 0.301 |
| GENE_A_18_P13919782 | 141 | 16 | 16 | 0.279 |
| GENE_A_18_P13898009 | 161 | 15 | 15 | 0.318 |
| GENE_A_16_P21238597 | 151 | 16 | 16 | 0.299 |
| GENE_A_16_P21251689 | 161 | 14 | 14 | 0.318 |
| GENE_A_16_P21240133 | 158 | 13 | 14 | 0.312 |
| GENE_A_16_P58296259 | 141 | 13 | 13 | 0.279 |
| GENE_A_16_P21204531 | 138 | 13 | 13 | 0.273 |
| GENE_A_16_P41440528 | 144 | 14 | 14 | 0.284 |
| GENE_A_16_P21223468 | 146 | 14 | 14 | 0.288 |
| GENE_A_16_P21207646 | 137 | 14 | 14 | 0.271 |
| GENE_A_16_P41402317 | 158 | 18 | 18 | 0.312 |
| GENE_A_16_P21201198 | 146 | 16 | 16 | 0.288 |
| GENE_A_16_P34780136 | 155 | 16 | 16 | 0.306 |
| GENE_A_16_P21243474 | 146 | 15 | 15 | 0.288 |
| GENE_A_16_P21231407 | 156 | 16 | 16 | 0.308 |
| GENE_A_18_P22545057 | 140 | 16 | 17 | 0.276 |

|                     |     |    |    |       |
|---------------------|-----|----|----|-------|
| GENE_A_16_P21219452 | 147 | 16 | 16 | 0.290 |
| GENE_A_18_P22582929 | 138 | 15 | 16 | 0.272 |
| GENE_A_16_P03589854 | 183 | 19 | 19 | 0.361 |
| GENE_A_16_P21232309 | 171 | 18 | 18 | 0.337 |
| GENE_A_16_P21265272 | 155 | 16 | 16 | 0.306 |
| GENE_A_16_P58268764 | 133 | 16 | 16 | 0.262 |
| GENE_A_16_P21219672 | 136 | 14 | 14 | 0.268 |
| GENE_A_18_P13945051 | 152 | 16 | 16 | 0.300 |
| GENE_A_16_P58286043 | 158 | 13 | 13 | 0.312 |
| GENE_A_16_P41443723 | 138 | 13 | 13 | 0.272 |
| GENE_A_16_P21217921 | 150 | 15 | 15 | 0.296 |
| GENE_A_16_P58277212 | 152 | 17 | 17 | 0.300 |
| GENE_A_16_P21263640 | 138 | 14 | 14 | 0.272 |
| GENE_A_16_P03591535 | 139 | 13 | 13 | 0.274 |
| GENE_A_16_P03592878 | 140 | 13 | 15 | 0.276 |
| GENE_A_16_P21248095 | 143 | 13 | 14 | 0.282 |
| GENE_A_16_P21268232 | 134 | 15 | 16 | 0.264 |
| GENE_A_18_P13911306 | 161 | 17 | 17 | 0.317 |
| GENE_A_16_P21240086 | 156 | 15 | 16 | 0.307 |
| GENE_A_16_P58264679 | 140 | 14 | 14 | 0.276 |
| GENE_A_16_P58296149 | 159 | 14 | 14 | 0.313 |
| GENE_A_18_P22517117 | 135 | 17 | 17 | 0.266 |
| GENE_A_16_P21250311 | 141 | 16 | 16 | 0.277 |
| GENE_A_16_P21216595 | 141 | 11 | 11 | 0.277 |
| GENE_A_16_P03556575 | 148 | 14 | 14 | 0.291 |
| GENE_A_18_P13887916 | 154 | 18 | 18 | 0.303 |
| GENE_A_16_P03585769 | 141 | 10 | 11 | 0.277 |
| GENE_A_16_P03575554 | 135 | 9  | 9  | 0.265 |
| GENE_A_16_P58291584 | 169 | 16 | 16 | 0.332 |
| GENE_A_16_P58297914 | 144 | 16 | 17 | 0.283 |
| GENE_A_16_P41447293 | 137 | 15 | 15 | 0.269 |
| GENE_A_16_P21254315 | 141 | 15 | 15 | 0.277 |
| GENE_A_18_P13882684 | 139 | 17 | 17 | 0.273 |
| GENE_A_16_P21199617 | 153 | 17 | 17 | 0.301 |
| GENE_A_16_P58290693 | 156 | 15 | 15 | 0.307 |
| GENE_A_16_P41432912 | 161 | 14 | 14 | 0.316 |
| GENE_A_16_P41428892 | 142 | 15 | 17 | 0.279 |
| GENE_A_18_P22573846 | 149 | 12 | 12 | 0.293 |
| GENE_A_16_P58265131 | 160 | 20 | 20 | 0.314 |
| GENE_A_16_P58301030 | 163 | 14 | 14 | 0.320 |
| GENE_A_18_P22599612 | 149 | 17 | 17 | 0.293 |
| GENE_A_16_P21244673 | 150 | 13 | 13 | 0.295 |
| GENE_A_16_P21232493 | 138 | 16 | 16 | 0.271 |
| GENE_A_16_P58268073 | 132 | 14 | 15 | 0.259 |
| GENE_A_16_P03579935 | 144 | 17 | 17 | 0.283 |
| GENE_A_16_P21229474 | 160 | 17 | 18 | 0.314 |

|                     |     |    |    |       |
|---------------------|-----|----|----|-------|
| GENE_A_16_P21246010 | 133 | 13 | 13 | 0.261 |
| GENE_A_18_P13874655 | 156 | 14 | 14 | 0.306 |
| GENE_A_16_P41441835 | 138 | 13 | 13 | 0.271 |
| GENE_A_16_P21251232 | 161 | 20 | 21 | 0.316 |
| GENE_A_16_P03597094 | 170 | 14 | 14 | 0.333 |
| GENE_A_16_P03572861 | 141 | 14 | 14 | 0.276 |
| GENE_A_16_P41389199 | 156 | 16 | 16 | 0.306 |
| GENE_A_16_P03583423 | 138 | 13 | 13 | 0.271 |
| GENE_A_16_P58276096 | 140 | 15 | 15 | 0.274 |
| GENE_A_16_P41418740 | 149 | 16 | 16 | 0.292 |
| GENE_A_18_P13901192 | 165 | 14 | 14 | 0.323 |
| GENE_A_16_P58269901 | 154 | 17 | 17 | 0.302 |
| GENE_A_18_P22505546 | 139 | 14 | 14 | 0.272 |
| GENE_A_16_P58273337 | 157 | 14 | 14 | 0.308 |
| GENE_A_18_P13917396 | 149 | 16 | 16 | 0.292 |
| GENE_A_16_P58280666 | 147 | 13 | 13 | 0.288 |
| GENE_A_16_P21195911 | 168 | 16 | 16 | 0.329 |
| GENE_A_16_P03551673 | 133 | 14 | 14 | 0.261 |
| GENE_A_16_P41392780 | 146 | 18 | 18 | 0.286 |
| GENE_A_16_P21206177 | 140 | 14 | 14 | 0.274 |
| GENE_A_16_P41431703 | 141 | 13 | 13 | 0.276 |
| GENE_A_18_P22592209 | 146 | 15 | 15 | 0.286 |
| GENE_A_16_P03570992 | 139 | 13 | 16 | 0.272 |
| GENE_A_16_P58282425 | 138 | 15 | 15 | 0.270 |
| GENE_A_16_P58283942 | 150 | 18 | 18 | 0.293 |
| GENE_A_16_P41421755 | 168 | 15 | 15 | 0.329 |
| GENE_A_16_P58261043 | 146 | 13 | 13 | 0.286 |
| GENE_A_16_P03584721 | 165 | 13 | 13 | 0.323 |
| GENE_A_18_P22555505 | 144 | 16 | 17 | 0.282 |
| GENE_A_16_P58264078 | 151 | 14 | 14 | 0.295 |
| GENE_A_16_P03565582 | 135 | 11 | 11 | 0.264 |
| GENE_A_16_P41417111 | 148 | 15 | 15 | 0.289 |
| GENE_A_16_P41448544 | 157 | 14 | 14 | 0.307 |
| GENE_A_16_P58280020 | 160 | 16 | 16 | 0.313 |
| GENE_A_16_P03557162 | 157 | 18 | 18 | 0.307 |
| GENE_A_18_P13899689 | 151 | 14 | 14 | 0.295 |
| GENE_A_16_P21249418 | 137 | 16 | 16 | 0.268 |
| GENE_A_16_P21204728 | 170 | 19 | 19 | 0.332 |
| GENE_A_18_P13872087 | 154 | 14 | 14 | 0.301 |
| GENE_A_18_P13916942 | 143 | 15 | 15 | 0.279 |
| GENE_A_16_P21199375 | 174 | 19 | 19 | 0.340 |
| GENE_A_16_P41427926 | 163 | 17 | 17 | 0.318 |
| GENE_A_18_P13867997 | 156 | 16 | 16 | 0.305 |
| GENE_A_16_P58285238 | 144 | 13 | 13 | 0.281 |
| GENE_A_16_P21216185 | 161 | 15 | 15 | 0.314 |
| GENE_A_16_P58274840 | 140 | 15 | 15 | 0.273 |

|                     |     |    |    |       |
|---------------------|-----|----|----|-------|
| GENE_A_16_P03586040 | 147 | 14 | 14 | 0.287 |
| GENE_A_18_P13903395 | 151 | 15 | 15 | 0.294 |
| GENE_A_16_P58298881 | 141 | 14 | 14 | 0.275 |
| GENE_A_18_P13914051 | 135 | 17 | 17 | 0.263 |
| GENE_A_16_P21269695 | 138 | 13 | 14 | 0.269 |
| GENE_A_16_P41432507 | 146 | 17 | 17 | 0.285 |
| GENE_A_16_P03551783 | 141 | 18 | 18 | 0.275 |
| GENE_A_16_P03589677 | 179 | 16 | 16 | 0.349 |
| GENE_A_16_P03592954 | 132 | 12 | 12 | 0.257 |
| GENE_A_16_P21212483 | 154 | 14 | 14 | 0.300 |
| GENE_A_16_P03596873 | 131 | 11 | 11 | 0.255 |
| GENE_A_16_P58292133 | 141 | 14 | 14 | 0.275 |
| GENE_A_16_P21214522 | 157 | 17 | 17 | 0.306 |
| GENE_A_16_P21194377 | 142 | 13 | 13 | 0.277 |
| GENE_A_16_P58268701 | 147 | 13 | 13 | 0.286 |
| GENE_A_18_P22533023 | 150 | 16 | 17 | 0.292 |
| GENE_A_16_P03553733 | 152 | 17 | 18 | 0.296 |
| GENE_A_16_P03550799 | 158 | 17 | 17 | 0.307 |
| GENE_A_16_P21209817 | 152 | 18 | 18 | 0.296 |
| GENE_A_16_P03591818 | 152 | 15 | 15 | 0.296 |
| GENE_A_16_P41447531 | 156 | 19 | 19 | 0.303 |
| GENE_A_16_P21210103 | 146 | 16 | 16 | 0.284 |
| GENE_A_16_P03582898 | 160 | 19 | 19 | 0.311 |
| GENE_A_18_P13937520 | 145 | 12 | 13 | 0.282 |
| GENE_A_16_P03590834 | 144 | 11 | 11 | 0.280 |
| GENE_A_16_P21240430 | 140 | 15 | 15 | 0.272 |
| GENE_A_16_P03585075 | 148 | 19 | 19 | 0.287 |
| GENE_A_16_P58264304 | 146 | 16 | 16 | 0.284 |
| GENE_A_18_P13875175 | 152 | 12 | 12 | 0.295 |
| GENE_A_16_P58289987 | 153 | 15 | 15 | 0.297 |
| GENE_A_16_P21225366 | 149 | 16 | 16 | 0.289 |
| GENE_A_18_P13861054 | 154 | 13 | 13 | 0.299 |
| GENE_A_16_P21211678 | 143 | 13 | 13 | 0.278 |
| GENE_A_16_P58294441 | 144 | 15 | 16 | 0.279 |
| GENE_A_16_P03585204 | 148 | 12 | 12 | 0.287 |
| GENE_A_16_P03594231 | 136 | 12 | 12 | 0.264 |
| GENE_A_16_P21239755 | 170 | 19 | 20 | 0.330 |
| GENE_A_16_P58287611 | 147 | 14 | 14 | 0.285 |
| GENE_A_16_P21237523 | 151 | 17 | 17 | 0.293 |
| GENE_A_16_P41396828 | 147 | 15 | 15 | 0.285 |
| GENE_A_16_P21194716 | 175 | 21 | 21 | 0.340 |
| GENE_A_16_P21247414 | 154 | 15 | 15 | 0.299 |
| GENE_A_16_P58284383 | 150 | 10 | 10 | 0.291 |
| GENE_A_18_P13893405 | 135 | 15 | 15 | 0.262 |
| GENE_A_18_P13904320 | 150 | 17 | 17 | 0.291 |
| GENE_A_16_P03582857 | 140 | 14 | 14 | 0.271 |

|                     |     |    |    |       |
|---------------------|-----|----|----|-------|
| GENE_A_16_P21210675 | 152 | 15 | 15 | 0.295 |
| GENE_A_16_P58273356 | 136 | 15 | 15 | 0.264 |
| GENE_A_16_P41394982 | 176 | 21 | 21 | 0.341 |
| GENE_A_16_P41450343 | 154 | 17 | 17 | 0.298 |
| GENE_A_16_P58295513 | 142 | 15 | 15 | 0.275 |
| GENE_A_16_P58277619 | 157 | 19 | 19 | 0.304 |
| GENE_A_18_P13861839 | 166 | 19 | 19 | 0.322 |
| GENE_A_16_P34784705 | 176 | 18 | 18 | 0.341 |
| GENE_A_16_P41440115 | 137 | 11 | 11 | 0.265 |
| GENE_A_16_P03584250 | 156 | 15 | 15 | 0.302 |
| GENE_A_14_P125555   | 143 | 13 | 14 | 0.277 |
| GENE_A_16_P21214639 | 146 | 15 | 15 | 0.283 |
| GENE_A_18_P13926906 | 164 | 19 | 19 | 0.318 |
| GENE_A_16_P58262449 | 143 | 12 | 12 | 0.277 |
| GENE_A_16_P41453930 | 152 | 19 | 19 | 0.294 |
| GENE_A_16_P21224637 | 160 | 15 | 15 | 0.310 |
| GENE_A_18_P13919794 | 179 | 19 | 19 | 0.347 |
| GENE_A_18_P13886616 | 162 | 14 | 14 | 0.314 |
| GENE_A_18_P13903378 | 169 | 16 | 16 | 0.327 |
| GENE_A_18_P13896832 | 151 | 15 | 15 | 0.292 |
| GENE_A_16_P58263278 | 172 | 17 | 17 | 0.333 |
| GENE_A_16_P21217635 | 137 | 15 | 15 | 0.265 |
| GENE_A_16_P41395738 | 174 | 19 | 19 | 0.337 |
| GENE_A_16_P21216843 | 123 | 14 | 14 | 0.238 |
| GENE_A_14_P128267   | 153 | 16 | 16 | 0.296 |
| GENE_A_18_P13933883 | 132 | 11 | 11 | 0.255 |
| GENE_A_16_P03558787 | 157 | 13 | 13 | 0.304 |
| GENE_A_16_P58260417 | 162 | 17 | 18 | 0.313 |
| GENE_A_16_P21224162 | 158 | 21 | 21 | 0.306 |
| GENE_A_18_P13862930 | 165 | 18 | 19 | 0.319 |
| GENE_A_18_P13905290 | 172 | 15 | 15 | 0.333 |
| GENE_A_16_P03580489 | 154 | 16 | 16 | 0.298 |
| GENE_A_16_P58301612 | 147 | 16 | 16 | 0.284 |
| GENE_A_16_P58309668 | 158 | 16 | 16 | 0.305 |
| GENE_A_18_P13865697 | 139 | 12 | 12 | 0.269 |
| GENE_A_16_P41414501 | 160 | 14 | 14 | 0.309 |
| GENE_A_16_P21259727 | 168 | 16 | 16 | 0.325 |
| GENE_A_16_P03552654 | 177 | 17 | 17 | 0.342 |
| GENE_A_16_P03555994 | 142 | 13 | 13 | 0.274 |
| GENE_A_16_P41429128 | 156 | 13 | 13 | 0.301 |
| GENE_A_16_P58267700 | 149 | 11 | 11 | 0.288 |
| GENE_A_16_P03585317 | 164 | 16 | 16 | 0.316 |
| GENE_A_16_P58272106 | 143 | 14 | 14 | 0.276 |
| GENE_A_16_P21200869 | 152 | 14 | 14 | 0.293 |
| GENE_A_16_P58276714 | 145 | 13 | 13 | 0.280 |
| GENE_A_16_P58302614 | 149 | 16 | 16 | 0.287 |

|                     |     |    |    |       |
|---------------------|-----|----|----|-------|
| GENE_A_16_P58306485 | 138 | 13 | 13 | 0.266 |
| GENE_A_16_P58277828 | 144 | 14 | 15 | 0.278 |
| GENE_A_16_P21251297 | 157 | 15 | 15 | 0.303 |
| GENE_A_16_P21241290 | 165 | 15 | 15 | 0.318 |
| GENE_A_16_P58297097 | 168 | 15 | 16 | 0.324 |
| GENE_A_18_P13863005 | 147 | 13 | 13 | 0.283 |
| GENE_A_16_P58296144 | 135 | 14 | 14 | 0.260 |
| GENE_A_16_P41391627 | 159 | 16 | 16 | 0.307 |
| GENE_A_16_P21228914 | 158 | 18 | 18 | 0.305 |
| GENE_A_16_P58278377 | 164 | 16 | 16 | 0.316 |
| GENE_A_16_P21200689 | 172 | 16 | 16 | 0.331 |
| GENE_A_18_P13931428 | 145 | 12 | 12 | 0.279 |
| GENE_A_16_P03553613 | 126 | 10 | 10 | 0.243 |
| GENE_A_16_P21235755 | 166 | 19 | 19 | 0.320 |
| GENE_A_16_P58275444 | 144 | 17 | 17 | 0.277 |
| GENE_A_16_P21212820 | 143 | 14 | 14 | 0.275 |
| GENE_A_16_P58301531 | 165 | 18 | 19 | 0.318 |
| GENE_A_16_P21260943 | 162 | 16 | 16 | 0.312 |
| GENE_A_16_P21209122 | 163 | 17 | 17 | 0.314 |
| GENE_A_16_P21215768 | 147 | 16 | 16 | 0.283 |
| GENE_A_16_P58294075 | 148 | 15 | 15 | 0.285 |
| GENE_A_16_P03577442 | 148 | 16 | 16 | 0.285 |
| GENE_A_16_P58306377 | 162 | 18 | 18 | 0.312 |
| GENE_A_16_P03590184 | 145 | 13 | 13 | 0.279 |
| GENE_A_16_P58261365 | 165 | 17 | 17 | 0.318 |
| GENE_A_18_P13862827 | 170 | 17 | 17 | 0.327 |
| GENE_A_16_P58291798 | 143 | 16 | 16 | 0.275 |
| GENE_A_16_P21193389 | 125 | 14 | 14 | 0.240 |
| GENE_A_16_P41410572 | 145 | 13 | 14 | 0.279 |
| GENE_A_18_P22573453 | 148 | 14 | 14 | 0.285 |
| GENE_A_16_P21255954 | 134 | 13 | 14 | 0.258 |
| GENE_A_16_P21193612 | 148 | 20 | 20 | 0.285 |
| GENE_A_16_P34802886 | 152 | 16 | 16 | 0.292 |
| GENE_A_16_P41424587 | 134 | 15 | 15 | 0.258 |
| GENE_A_16_P58303439 | 168 | 14 | 15 | 0.323 |
| GENE_A_16_P41409394 | 154 | 17 | 17 | 0.296 |
| GENE_A_16_P21219136 | 169 | 17 | 17 | 0.325 |
| GENE_A_16_P41428149 | 140 | 15 | 15 | 0.269 |
| GENE_A_16_P58283081 | 150 | 13 | 13 | 0.288 |
| GENE_A_18_P13858374 | 166 | 16 | 16 | 0.319 |
| GENE_A_16_P03588785 | 155 | 16 | 16 | 0.298 |
| GENE_A_16_P03550683 | 155 | 19 | 19 | 0.298 |
| GENE_A_18_P22493199 | 150 | 14 | 14 | 0.288 |
| GENE_A_16_P41407114 | 145 | 13 | 13 | 0.278 |
| GENE_A_18_P22596354 | 147 | 10 | 10 | 0.282 |
| GENE_A_16_P21231691 | 174 | 17 | 17 | 0.334 |

|                     |     |    |    |       |
|---------------------|-----|----|----|-------|
| GENE_A_16_P58291846 | 146 | 13 | 13 | 0.280 |
| GENE_A_16_P58298789 | 159 | 16 | 16 | 0.305 |
| GENE_A_16_P03588246 | 125 | 9  | 9  | 0.240 |
| GENE_A_16_P41396819 | 153 | 17 | 17 | 0.294 |
| GENE_A_16_P21218896 | 140 | 13 | 13 | 0.269 |
| GENE_A_16_P58305784 | 165 | 17 | 17 | 0.317 |
| GENE_A_16_P21196413 | 147 | 11 | 11 | 0.282 |
| GENE_A_18_P13911899 | 141 | 12 | 12 | 0.270 |
| GENE_A_16_P21256176 | 135 | 14 | 14 | 0.259 |
| GENE_A_16_P41392791 | 171 | 19 | 19 | 0.328 |
| GENE_A_16_P03595706 | 130 | 11 | 11 | 0.249 |
| GENE_A_16_P21241857 | 146 | 14 | 14 | 0.280 |
| GENE_A_16_P58298542 | 139 | 15 | 16 | 0.267 |
| GENE_A_16_P34777489 | 190 | 19 | 19 | 0.364 |
| GENE_A_16_P21262584 | 147 | 13 | 13 | 0.282 |
| GENE_A_16_P58299504 | 143 | 13 | 13 | 0.274 |
| GENE_A_18_P13889013 | 153 | 16 | 16 | 0.293 |
| GENE_A_16_P58297485 | 150 | 17 | 17 | 0.288 |
| GENE_A_16_P21192926 | 141 | 15 | 15 | 0.270 |
| GENE_A_18_P22592927 | 153 | 15 | 15 | 0.293 |
| GENE_A_18_P22542297 | 144 | 13 | 13 | 0.276 |
| GENE_A_16_P03598013 | 155 | 16 | 16 | 0.297 |
| GENE_A_16_P41401037 | 121 | 13 | 13 | 0.232 |
| GENE_A_16_P58268635 | 162 | 18 | 18 | 0.310 |
| GENE_A_16_P41458542 | 146 | 14 | 14 | 0.280 |
| GENE_A_16_P21234931 | 170 | 17 | 17 | 0.326 |
| GENE_A_16_P58301069 | 169 | 18 | 18 | 0.324 |
| GENE_A_16_P58266370 | 147 | 16 | 17 | 0.282 |
| GENE_A_16_P58309041 | 150 | 13 | 13 | 0.287 |
| GENE_A_16_P41419087 | 137 | 13 | 13 | 0.262 |
| GENE_A_16_P21256409 | 136 | 13 | 13 | 0.260 |
| GENE_A_16_P41415011 | 140 | 16 | 16 | 0.268 |
| GENE_A_16_P58281499 | 148 | 14 | 14 | 0.283 |
| GENE_A_16_P03576133 | 147 | 14 | 14 | 0.281 |
| GENE_A_16_P58299616 | 156 | 13 | 13 | 0.299 |
| GENE_A_16_P58270532 | 155 | 17 | 17 | 0.297 |
| GENE_A_16_P21241761 | 131 | 9  | 9  | 0.251 |
| GENE_A_18_P13935234 | 149 | 13 | 15 | 0.285 |
| GENE_A_16_P03560039 | 155 | 12 | 12 | 0.296 |
| GENE_A_16_P21217631 | 159 | 15 | 15 | 0.304 |
| GENE_A_16_P21241002 | 145 | 13 | 13 | 0.277 |
| GENE_A_16_P21245900 | 153 | 15 | 15 | 0.293 |
| GENE_A_18_P22585995 | 146 | 15 | 16 | 0.279 |
| GENE_A_16_P21218105 | 148 | 17 | 17 | 0.283 |
| GENE_A_16_P58287739 | 150 | 13 | 13 | 0.287 |
| GENE_A_16_P03574640 | 146 | 17 | 17 | 0.279 |



|                     |     |    |    |       |
|---------------------|-----|----|----|-------|
| GENE_A_16_P03594942 | 160 | 17 | 17 | 0.306 |
| GENE_A_16_P03575213 | 164 | 17 | 17 | 0.313 |
| GENE_A_18_P13869718 | 155 | 13 | 13 | 0.296 |
| GENE_A_16_P21215137 | 137 | 13 | 14 | 0.262 |
| GENE_A_16_P21253630 | 147 | 17 | 17 | 0.281 |
| GENE_A_18_P22595596 | 158 | 16 | 16 | 0.302 |
| GENE_A_16_P41439555 | 150 | 16 | 17 | 0.286 |
| GENE_A_16_P03591471 | 157 | 17 | 17 | 0.300 |
| GENE_A_16_P03572706 | 160 | 20 | 20 | 0.305 |
| GENE_A_16_P21206998 | 149 | 16 | 16 | 0.284 |
| GENE_A_16_P21208699 | 130 | 11 | 11 | 0.248 |
| GENE_A_16_P21245387 | 129 | 12 | 12 | 0.246 |
| GENE_A_16_P03580842 | 138 | 13 | 13 | 0.263 |
| GENE_A_16_P21268886 | 161 | 20 | 20 | 0.307 |
| GENE_A_16_P21231055 | 145 | 14 | 14 | 0.277 |
| GENE_A_16_P41440952 | 166 | 14 | 14 | 0.317 |
| GENE_A_16_P41415668 | 152 | 15 | 16 | 0.290 |
| GENE_A_16_P21198849 | 148 | 14 | 15 | 0.282 |
| GENE_A_16_P58263153 | 147 | 14 | 14 | 0.280 |
| GENE_A_18_P22527134 | 153 | 17 | 17 | 0.292 |
| GENE_A_16_P58300255 | 139 | 14 | 14 | 0.265 |
| GENE_A_16_P03582849 | 141 | 11 | 11 | 0.269 |
| GENE_A_16_P41409505 | 161 | 13 | 14 | 0.307 |
| GENE_A_16_P03580838 | 140 | 14 | 14 | 0.267 |
| GENE_A_16_P21226277 | 151 | 13 | 13 | 0.288 |
| GENE_A_16_P21207666 | 170 | 17 | 17 | 0.324 |
| GENE_A_16_P41437871 | 147 | 14 | 14 | 0.280 |
| GENE_A_16_P21235033 | 172 | 15 | 15 | 0.328 |
| GENE_A_16_P58304314 | 157 | 11 | 11 | 0.299 |
| GENE_A_18_P13861046 | 159 | 16 | 16 | 0.303 |
| GENE_A_18_P13905840 | 154 | 17 | 17 | 0.293 |
| GENE_A_16_P21228095 | 152 | 14 | 14 | 0.289 |
| GENE_A_16_P21235205 | 170 | 20 | 20 | 0.324 |
| GENE_A_16_P03583080 | 151 | 14 | 15 | 0.287 |
| GENE_A_16_P41391332 | 132 | 14 | 15 | 0.251 |
| GENE_A_16_P41437431 | 138 | 18 | 18 | 0.263 |
| GENE_A_16_P58263955 | 159 | 16 | 16 | 0.303 |
| GENE_A_16_P03593500 | 149 | 16 | 16 | 0.284 |
| GENE_A_16_P58274449 | 142 | 15 | 16 | 0.270 |
| GENE_A_18_P13937933 | 173 | 20 | 20 | 0.329 |
| GENE_A_16_P21272684 | 145 | 15 | 15 | 0.276 |
| GENE_A_16_P34811436 | 136 | 11 | 11 | 0.259 |
| GENE_A_18_P13894235 | 160 | 18 | 18 | 0.304 |
| GENE_A_16_P41410907 | 157 | 15 | 15 | 0.299 |
| GENE_A_16_P58267591 | 132 | 12 | 13 | 0.251 |
| GENE_A_16_P41448160 | 148 | 15 | 16 | 0.281 |

|                     |     |    |    |       |
|---------------------|-----|----|----|-------|
| GENE_A_16_P58272825 | 143 | 12 | 12 | 0.272 |
| GENE_A_16_P58276003 | 136 | 13 | 13 | 0.258 |
| GENE_A_16_P58287590 | 147 | 17 | 17 | 0.279 |
| GENE_A_16_P21203688 | 149 | 15 | 15 | 0.283 |
| GENE_A_16_P41397044 | 142 | 13 | 13 | 0.270 |
| GENE_A_16_P03596477 | 151 | 15 | 16 | 0.287 |
| GENE_A_16_P21205731 | 151 | 17 | 17 | 0.287 |
| GENE_A_16_P03578196 | 161 | 15 | 15 | 0.306 |
| GENE_A_18_P22562837 | 149 | 17 | 17 | 0.283 |
| GENE_A_16_P21261453 | 150 | 15 | 16 | 0.285 |
| GENE_A_16_P58279013 | 147 | 14 | 14 | 0.279 |
| GENE_A_18_P13943300 | 134 | 14 | 14 | 0.254 |
| GENE_A_16_P21206371 | 148 | 16 | 16 | 0.281 |
| GENE_A_16_P21234873 | 155 | 15 | 15 | 0.294 |
| GENE_A_16_P41408684 | 144 | 12 | 12 | 0.273 |
| GENE_A_16_P41399253 | 156 | 18 | 18 | 0.296 |
| GENE_A_16_P34779448 | 145 | 12 | 12 | 0.275 |
| GENE_A_16_P03594314 | 119 | 11 | 11 | 0.226 |
| GENE_A_16_P03576022 | 136 | 13 | 13 | 0.258 |
| GENE_A_16_P58277355 | 161 | 16 | 16 | 0.305 |
| GENE_A_18_P13941777 | 160 | 15 | 15 | 0.303 |
| GENE_A_16_P21260956 | 148 | 13 | 13 | 0.281 |
| GENE_A_16_P58266580 | 132 | 14 | 14 | 0.250 |
| GENE_A_18_P13858708 | 151 | 13 | 13 | 0.286 |
| GENE_A_16_P03592694 | 147 | 14 | 14 | 0.279 |
| GENE_A_16_P58295148 | 151 | 15 | 15 | 0.286 |
| GENE_A_16_P21249380 | 138 | 14 | 14 | 0.262 |
| GENE_A_16_P21210987 | 155 | 15 | 15 | 0.294 |
| GENE_A_18_P13881454 | 153 | 11 | 11 | 0.290 |
| GENE_A_16_P03576684 | 151 | 16 | 16 | 0.286 |
| GENE_A_16_P03596011 | 162 | 15 | 15 | 0.307 |
| GENE_A_16_P21227670 | 141 | 15 | 16 | 0.267 |
| GENE_A_18_P13884593 | 133 | 12 | 13 | 0.252 |
| GENE_A_16_P58265822 | 154 | 15 | 15 | 0.292 |
| GENE_A_16_P58280601 | 139 | 15 | 15 | 0.263 |
| GENE_A_16_P21242430 | 139 | 15 | 15 | 0.263 |
| GENE_A_16_P58263718 | 161 | 15 | 15 | 0.305 |
| GENE_A_16_P21223056 | 144 | 13 | 13 | 0.273 |
| GENE_A_16_P58285984 | 165 | 18 | 18 | 0.312 |
| GENE_A_16_P03554694 | 130 | 13 | 13 | 0.246 |
| GENE_A_16_P21257934 | 156 | 17 | 17 | 0.295 |
| GENE_A_16_P03587646 | 135 | 14 | 14 | 0.255 |
| GENE_A_16_P58259847 | 161 | 16 | 16 | 0.305 |
| GENE_A_16_P58283835 | 154 | 13 | 14 | 0.291 |
| GENE_A_16_P21266300 | 132 | 10 | 10 | 0.250 |
| GENE_A_18_P13944730 | 147 | 15 | 15 | 0.278 |

|                     |     |    |    |       |
|---------------------|-----|----|----|-------|
| GENE_A_16_P21228410 | 167 | 13 | 13 | 0.316 |
| GENE_A_16_P58302401 | 145 | 14 | 14 | 0.274 |
| GENE_A_16_P58268996 | 164 | 15 | 15 | 0.310 |
| GENE_A_16_P21238973 | 146 | 13 | 13 | 0.276 |
| GENE_A_16_P21220060 | 144 | 16 | 16 | 0.272 |
| GENE_A_16_P58295703 | 159 | 15 | 15 | 0.300 |
| GENE_A_16_P21258011 | 138 | 13 | 13 | 0.261 |
| GENE_A_16_P21212118 | 153 | 15 | 15 | 0.289 |
| GENE_A_16_P21260928 | 149 | 17 | 17 | 0.281 |
| GENE_A_16_P58283078 | 126 | 13 | 13 | 0.238 |
| GENE_A_16_P03594026 | 134 | 10 | 10 | 0.253 |
| GENE_A_16_P41391476 | 140 | 13 | 13 | 0.264 |
| GENE_A_18_P13924279 | 159 | 16 | 16 | 0.300 |
| GENE_A_16_P21232137 | 148 | 15 | 15 | 0.279 |
| GENE_A_16_P58291772 | 156 | 16 | 16 | 0.294 |
| GENE_A_16_P21198602 | 136 | 15 | 15 | 0.257 |
| GENE_A_16_P58277837 | 131 | 13 | 13 | 0.247 |
| GENE_A_16_P58308276 | 161 | 14 | 14 | 0.304 |
| GENE_A_16_P21259585 | 129 | 14 | 14 | 0.243 |
| GENE_A_16_P21215589 | 169 | 17 | 17 | 0.319 |
| GENE_A_16_P21226916 | 150 | 13 | 13 | 0.283 |
| GENE_A_18_P13898981 | 151 | 16 | 17 | 0.285 |
| GENE_A_16_P21247706 | 126 | 13 | 13 | 0.238 |
| GENE_A_16_P41423982 | 155 | 14 | 14 | 0.292 |
| GENE_A_18_P22509448 | 152 | 13 | 13 | 0.287 |
| GENE_A_16_P21248285 | 136 | 12 | 14 | 0.256 |
| GENE_A_16_P58271606 | 153 | 16 | 16 | 0.288 |
| GENE_A_16_P58281753 | 156 | 17 | 18 | 0.294 |
| GENE_A_16_P41447031 | 165 | 13 | 13 | 0.311 |
| GENE_A_16_P58271418 | 157 | 21 | 21 | 0.296 |
| GENE_A_16_P03563943 | 156 | 19 | 19 | 0.294 |
| GENE_A_16_P03591509 | 145 | 15 | 15 | 0.273 |
| GENE_A_18_P13936334 | 162 | 18 | 18 | 0.305 |
| GENE_A_16_P58283271 | 162 | 17 | 17 | 0.305 |
| GENE_A_16_P21226783 | 140 | 14 | 14 | 0.263 |
| GENE_A_18_P22484408 | 151 | 15 | 15 | 0.284 |
| GENE_A_16_P21244254 | 152 | 14 | 14 | 0.286 |
| GENE_A_18_P22488715 | 142 | 14 | 14 | 0.267 |
| GENE_A_16_P58308250 | 176 | 18 | 18 | 0.331 |
| GENE_A_16_P21222971 | 158 | 14 | 14 | 0.297 |
| GENE_A_16_P41393905 | 161 | 17 | 17 | 0.303 |
| GENE_A_16_P03587153 | 165 | 12 | 12 | 0.310 |
| GENE_A_16_P58267769 | 152 | 13 | 13 | 0.286 |
| GENE_A_16_P41391700 | 136 | 13 | 13 | 0.256 |
| GENE_A_16_P21209015 | 157 | 15 | 15 | 0.295 |
| GENE_A_16_P21218621 | 151 | 14 | 14 | 0.284 |

|                     |     |    |    |       |
|---------------------|-----|----|----|-------|
| GENE_A_16_P03571815 | 159 | 15 | 16 | 0.299 |
| GENE_A_16_P58300753 | 141 | 14 | 14 | 0.265 |
| GENE_A_16_P21200573 | 153 | 16 | 16 | 0.287 |
| GENE_A_16_P21218955 | 167 | 18 | 18 | 0.314 |
| GENE_A_14_P133410   | 127 | 13 | 13 | 0.239 |
| GENE_A_16_P58301016 | 143 | 14 | 14 | 0.269 |
| GENE_A_16_P58262743 | 135 | 14 | 14 | 0.254 |
| GENE_A_16_P34821182 | 171 | 18 | 18 | 0.321 |
| GENE_A_16_P03591168 | 149 | 18 | 18 | 0.280 |
| GENE_A_18_P13943343 | 164 | 18 | 18 | 0.308 |
| GENE_A_16_P58260796 | 166 | 18 | 18 | 0.311 |
| GENE_A_16_P21240058 | 152 | 17 | 17 | 0.285 |
| GENE_A_16_P58277709 | 136 | 10 | 10 | 0.255 |
| GENE_A_16_P03594455 | 137 | 11 | 11 | 0.257 |
| GENE_A_18_P22594002 | 145 | 14 | 14 | 0.272 |
| GENE_A_16_P58302192 | 141 | 14 | 14 | 0.264 |
| GENE_A_16_P58277618 | 135 | 12 | 12 | 0.253 |
| GENE_A_16_P58272372 | 135 | 16 | 16 | 0.253 |
| GENE_A_16_P21265275 | 147 | 13 | 13 | 0.276 |
| GENE_A_16_P21194656 | 136 | 15 | 15 | 0.255 |
| GENE_A_16_P21236338 | 149 | 17 | 17 | 0.279 |
| GENE_A_16_P58284058 | 142 | 15 | 15 | 0.266 |
| GENE_A_18_P13891792 | 130 | 13 | 14 | 0.244 |
| GENE_A_16_P21203294 | 149 | 15 | 15 | 0.279 |
| GENE_A_16_P03594999 | 136 | 11 | 11 | 0.255 |
| GENE_A_16_P03580794 | 154 | 15 | 15 | 0.289 |
| GENE_A_16_P41408475 | 146 | 13 | 13 | 0.274 |
| GENE_A_16_P03579149 | 142 | 13 | 13 | 0.266 |
| GENE_A_16_P58309004 | 149 | 14 | 14 | 0.279 |
| GENE_A_16_P21216923 | 140 | 13 | 13 | 0.262 |
| GENE_A_16_P41425573 | 156 | 17 | 17 | 0.292 |
| GENE_A_16_P58276731 | 148 | 14 | 14 | 0.277 |
| GENE_A_16_P03576412 | 141 | 13 | 14 | 0.264 |
| GENE_A_18_P13905945 | 129 | 11 | 11 | 0.241 |
| GENE_A_16_P03581850 | 171 | 16 | 16 | 0.320 |
| GENE_A_16_P21272218 | 153 | 16 | 16 | 0.286 |
| GENE_A_18_P13861002 | 148 | 15 | 15 | 0.277 |
| GENE_A_16_P21227758 | 166 | 16 | 17 | 0.311 |
| GENE_A_18_P13859660 | 161 | 15 | 15 | 0.301 |
| GENE_A_18_P22594182 | 135 | 13 | 13 | 0.253 |
| GENE_A_16_P58280885 | 141 | 16 | 16 | 0.264 |
| GENE_A_16_P21203723 | 130 | 15 | 15 | 0.243 |
| GENE_A_16_P21259949 | 138 | 14 | 14 | 0.258 |
| GENE_A_16_P58266640 | 169 | 18 | 18 | 0.316 |
| GENE_A_18_P22543933 | 130 | 11 | 11 | 0.243 |
| GENE_A_16_P58269400 | 148 | 16 | 17 | 0.277 |

|                     |     |    |    |       |
|---------------------|-----|----|----|-------|
| GENE_A_16_P21272636 | 148 | 16 | 16 | 0.277 |
| GENE_A_16_P03565165 | 165 | 16 | 16 | 0.308 |
| GENE_A_16_P21251587 | 173 | 19 | 19 | 0.323 |
| GENE_A_16_P21209150 | 146 | 12 | 12 | 0.273 |
| GENE_A_16_P58289048 | 154 | 16 | 16 | 0.288 |
| GENE_A_16_P03561378 | 161 | 16 | 16 | 0.301 |
| GENE_A_16_P58277684 | 155 | 14 | 14 | 0.290 |
| GENE_A_18_P13887412 | 160 | 16 | 16 | 0.299 |
| GENE_A_16_P58286081 | 132 | 14 | 14 | 0.247 |
| GENE_A_16_P03595524 | 169 | 12 | 12 | 0.316 |
| GENE_A_16_P03554013 | 166 | 17 | 17 | 0.310 |
| GENE_A_16_P58264830 | 153 | 15 | 15 | 0.286 |
| GENE_A_16_P21240665 | 149 | 17 | 17 | 0.278 |
| GENE_A_16_P21220190 | 154 | 15 | 15 | 0.288 |
| GENE_A_16_P21232420 | 155 | 16 | 16 | 0.289 |
| GENE_A_16_P21235325 | 143 | 14 | 14 | 0.267 |
| GENE_A_16_P21223675 | 139 | 12 | 12 | 0.259 |
| GENE_A_16_P21249513 | 158 | 12 | 12 | 0.295 |
| GENE_A_16_P21235099 | 153 | 16 | 16 | 0.286 |
| GENE_A_16_P58287513 | 175 | 16 | 16 | 0.327 |
| GENE_A_16_P41394080 | 155 | 14 | 14 | 0.289 |
| GENE_A_16_P41430386 | 159 | 17 | 17 | 0.297 |
| GENE_A_16_P41398443 | 144 | 13 | 13 | 0.269 |
| GENE_A_16_P03584126 | 143 | 14 | 14 | 0.267 |
| GENE_A_16_P03595830 | 152 | 17 | 17 | 0.283 |
| GENE_A_16_P03575315 | 151 | 16 | 16 | 0.281 |
| GENE_A_16_P21255379 | 136 | 15 | 15 | 0.253 |
| GENE_A_16_P58291585 | 153 | 14 | 14 | 0.285 |
| GENE_A_16_P58274481 | 145 | 17 | 17 | 0.270 |
| GENE_A_18_P13864840 | 157 | 16 | 16 | 0.292 |
| GENE_A_16_P58286459 | 143 | 14 | 14 | 0.266 |
| GENE_A_16_P21239932 | 151 | 13 | 13 | 0.281 |
| GENE_A_16_P58261088 | 168 | 17 | 17 | 0.313 |
| GENE_A_16_P21229977 | 146 | 16 | 16 | 0.272 |
| GENE_A_16_P41442448 | 152 | 15 | 15 | 0.283 |
| GENE_A_16_P21215156 | 137 | 14 | 14 | 0.255 |
| GENE_A_16_P58293734 | 163 | 19 | 19 | 0.303 |
| GENE_A_16_P41419226 | 133 | 17 | 17 | 0.248 |
| GENE_A_18_P13889255 | 145 | 17 | 17 | 0.270 |
| GENE_A_16_P41406477 | 143 | 15 | 15 | 0.266 |
| GENE_A_16_P58289553 | 152 | 13 | 13 | 0.283 |
| GENE_A_16_P58265559 | 162 | 16 | 16 | 0.301 |
| GENE_A_16_P58305718 | 143 | 16 | 16 | 0.266 |
| GENE_A_16_P58291287 | 151 | 13 | 13 | 0.281 |
| GENE_A_16_P21218685 | 161 | 16 | 16 | 0.299 |
| GENE_A_18_P13919382 | 126 | 14 | 14 | 0.234 |

|                     |     |    |    |       |
|---------------------|-----|----|----|-------|
| GENE_A_16_P03572716 | 126 | 12 | 12 | 0.234 |
| GENE_A_16_P21238770 | 169 | 18 | 18 | 0.314 |
| GENE_A_16_P03594042 | 161 | 19 | 19 | 0.299 |
| GENE_A_16_P41392544 | 155 | 16 | 16 | 0.288 |
| GENE_A_16_P21224825 | 153 | 16 | 16 | 0.284 |
| GENE_A_16_P21232351 | 130 | 10 | 10 | 0.242 |
| GENE_A_16_P58305765 | 136 | 12 | 12 | 0.253 |
| GENE_A_18_P22524488 | 148 | 20 | 20 | 0.275 |
| GENE_A_16_P03594925 | 137 | 13 | 13 | 0.254 |
| GENE_A_16_P21239027 | 161 | 17 | 17 | 0.299 |
| GENE_A_16_P03560792 | 149 | 17 | 17 | 0.277 |
| GENE_A_16_P21194000 | 148 | 16 | 17 | 0.275 |
| GENE_A_18_P13861419 | 141 | 12 | 12 | 0.262 |
| GENE_A_16_P41413868 | 149 | 15 | 15 | 0.277 |
| GENE_A_16_P41460381 | 160 | 19 | 19 | 0.297 |
| GENE_A_18_P13927433 | 157 | 14 | 14 | 0.292 |
| GENE_A_16_P58292654 | 150 | 16 | 16 | 0.278 |
| GENE_A_16_P41408109 | 162 | 16 | 16 | 0.301 |
| GENE_A_16_P21258684 | 143 | 11 | 11 | 0.265 |
| GENE_A_18_P13923041 | 141 | 14 | 15 | 0.262 |
| GENE_A_16_P58274896 | 166 | 15 | 15 | 0.308 |
| GENE_A_16_P21205866 | 128 | 12 | 12 | 0.237 |
| GENE_A_16_P21215694 | 161 | 14 | 14 | 0.299 |
| GENE_A_16_P58276047 | 147 | 14 | 15 | 0.273 |
| GENE_A_18_P22501450 | 142 | 17 | 17 | 0.263 |
| GENE_A_16_P58264403 | 155 | 17 | 17 | 0.287 |
| GENE_A_16_P21212333 | 142 | 14 | 14 | 0.263 |
| GENE_A_16_P41389844 | 150 | 16 | 16 | 0.278 |
| GENE_A_16_P41416700 | 154 | 14 | 14 | 0.286 |
| GENE_A_16_P03556096 | 133 | 17 | 17 | 0.247 |
| GENE_A_16_P41442103 | 129 | 11 | 11 | 0.239 |
| GENE_A_16_P41437066 | 145 | 14 | 14 | 0.269 |
| GENE_A_16_P03591158 | 139 | 15 | 15 | 0.258 |
| GENE_A_16_P41425285 | 164 | 16 | 16 | 0.304 |
| GENE_A_18_P22584083 | 122 | 13 | 14 | 0.226 |
| GENE_A_18_P22594299 | 138 | 12 | 13 | 0.256 |
| GENE_A_16_P41415372 | 138 | 14 | 14 | 0.256 |
| GENE_A_16_P58269522 | 142 | 15 | 15 | 0.263 |
| GENE_A_16_P03586623 | 162 | 15 | 15 | 0.300 |
| GENE_A_18_P22532610 | 162 | 16 | 17 | 0.300 |
| GENE_A_16_P34775145 | 150 | 14 | 14 | 0.278 |
| GENE_A_18_P13920309 | 159 | 15 | 16 | 0.294 |
| GENE_A_16_P41442253 | 138 | 13 | 13 | 0.255 |
| GENE_A_16_P58267203 | 149 | 15 | 15 | 0.276 |
| GENE_A_18_P22488985 | 153 | 18 | 18 | 0.283 |
| GENE_A_16_P41390357 | 143 | 16 | 16 | 0.265 |

|                     |     |    |    |       |
|---------------------|-----|----|----|-------|
| GENE_A_18_P13946050 | 148 | 16 | 16 | 0.274 |
| GENE_A_18_P13946153 | 153 | 16 | 16 | 0.283 |
| GENE_A_16_P41445864 | 135 | 12 | 12 | 0.250 |
| GENE_A_16_P41436850 | 139 | 12 | 12 | 0.257 |
| GENE_A_18_P13891532 | 138 | 13 | 13 | 0.255 |
| GENE_A_16_P58305938 | 137 | 12 | 12 | 0.253 |
| GENE_A_16_P21228688 | 150 | 15 | 15 | 0.277 |
| GENE_A_16_P58269230 | 152 | 15 | 15 | 0.281 |
| GENE_A_16_P21242301 | 140 | 16 | 16 | 0.259 |
| GENE_A_16_P21214975 | 155 | 15 | 15 | 0.286 |
| GENE_A_16_P41431965 | 162 | 19 | 19 | 0.299 |
| GENE_A_16_P03556317 | 155 | 17 | 17 | 0.286 |
| GENE_A_16_P21271949 | 153 | 16 | 16 | 0.283 |
| GENE_A_16_P21201469 | 163 | 18 | 18 | 0.301 |
| GENE_A_16_P21246328 | 166 | 16 | 16 | 0.307 |
| GENE_A_16_P03569308 | 162 | 15 | 16 | 0.299 |
| GENE_A_16_P03582161 | 133 | 12 | 12 | 0.246 |
| GENE_A_16_P41467135 | 142 | 15 | 15 | 0.262 |
| GENE_A_16_P21250866 | 134 | 12 | 12 | 0.247 |
| GENE_A_16_P21234720 | 156 | 15 | 15 | 0.288 |
| GENE_A_16_P41432184 | 152 | 17 | 17 | 0.281 |
| GENE_A_16_P58287643 | 137 | 14 | 14 | 0.253 |
| GENE_A_16_P21248589 | 145 | 13 | 13 | 0.268 |
| GENE_A_16_P21202879 | 138 | 13 | 13 | 0.255 |
| GENE_A_16_P03563148 | 156 | 16 | 16 | 0.288 |
| GENE_A_16_P21252539 | 148 | 14 | 14 | 0.273 |
| GENE_A_16_P58260380 | 154 | 16 | 16 | 0.284 |
| GENE_A_16_P21218535 | 139 | 14 | 14 | 0.256 |
| GENE_A_16_P21258406 | 140 | 11 | 11 | 0.258 |
| GENE_A_16_P58276984 | 136 | 15 | 15 | 0.251 |
| GENE_A_16_P03580678 | 172 | 17 | 18 | 0.317 |
| GENE_A_16_P21265364 | 165 | 16 | 16 | 0.304 |
| GENE_A_16_P21202943 | 151 | 13 | 13 | 0.278 |
| GENE_A_16_P41417349 | 153 | 16 | 16 | 0.282 |
| GENE_A_16_P58287253 | 140 | 14 | 14 | 0.258 |
| GENE_A_16_P58295213 | 150 | 16 | 16 | 0.276 |
| GENE_A_16_P58281035 | 159 | 15 | 15 | 0.293 |
| GENE_A_18_P13885925 | 158 | 15 | 15 | 0.291 |
| GENE_A_18_P22520790 | 153 | 14 | 14 | 0.281 |
| GENE_A_16_P03588474 | 165 | 14 | 15 | 0.303 |
| GENE_A_16_P03580199 | 153 | 14 | 14 | 0.281 |
| GENE_A_16_P21228092 | 152 | 14 | 14 | 0.280 |
| GENE_A_16_P21237995 | 153 | 15 | 15 | 0.281 |
| GENE_A_16_P21197743 | 135 | 10 | 10 | 0.248 |
| GENE_A_16_P58270495 | 140 | 13 | 13 | 0.257 |
| GENE_A_16_P21213959 | 167 | 16 | 16 | 0.307 |

|                     |     |    |    |       |
|---------------------|-----|----|----|-------|
| GENE_A_16_P03555232 | 143 | 14 | 14 | 0.263 |
| GENE_A_16_P03575739 | 141 | 11 | 11 | 0.259 |
| GENE_A_16_P21219333 | 138 | 15 | 15 | 0.254 |
| GENE_A_16_P21248216 | 147 | 17 | 17 | 0.270 |
| GENE_A_16_P58279263 | 161 | 19 | 19 | 0.296 |
| GENE_A_18_P13881368 | 151 | 17 | 17 | 0.278 |
| GENE_A_16_P58309378 | 177 | 17 | 17 | 0.325 |
| GENE_A_16_P21193998 | 162 | 18 | 18 | 0.298 |
| GENE_A_16_P21248364 | 131 | 15 | 15 | 0.241 |
| GENE_A_16_P41402219 | 163 | 18 | 18 | 0.300 |
| GENE_A_16_P03579573 | 149 | 14 | 14 | 0.274 |
| GENE_A_16_P41457422 | 172 | 18 | 18 | 0.316 |
| GENE_A_16_P58304685 | 157 | 12 | 12 | 0.288 |
| GENE_A_16_P21226740 | 148 | 14 | 14 | 0.272 |
| GENE_A_16_P21236583 | 148 | 12 | 12 | 0.272 |
| GENE_A_16_P03568436 | 167 | 19 | 19 | 0.307 |
| GENE_A_16_P03594994 | 146 | 16 | 16 | 0.268 |
| GENE_A_16_P58290823 | 142 | 13 | 13 | 0.261 |
| GENE_A_16_P21215187 | 143 | 17 | 17 | 0.262 |
| GENE_A_18_P13937318 | 152 | 13 | 13 | 0.279 |
| GENE_A_16_P58265602 | 155 | 17 | 17 | 0.284 |
| GENE_A_16_P03555934 | 164 | 17 | 17 | 0.301 |
| GENE_A_16_P21257969 | 158 | 17 | 17 | 0.290 |
| GENE_A_16_P21228072 | 114 | 12 | 12 | 0.209 |
| GENE_A_16_P58287529 | 166 | 19 | 19 | 0.304 |
| GENE_A_16_P21197460 | 129 | 15 | 15 | 0.237 |
| GENE_A_16_P41419830 | 141 | 14 | 14 | 0.259 |
| GENE_A_16_P21232423 | 139 | 14 | 14 | 0.255 |
| GENE_A_16_P03582845 | 151 | 12 | 12 | 0.277 |
| GENE_A_16_P41403168 | 150 | 12 | 13 | 0.275 |
| GENE_A_16_P58262506 | 156 | 13 | 13 | 0.286 |
| GENE_A_18_P13891245 | 162 | 12 | 12 | 0.297 |
| GENE_A_16_P21225121 | 162 | 15 | 15 | 0.297 |
| GENE_A_18_P13916565 | 144 | 14 | 14 | 0.264 |
| GENE_A_16_P58270845 | 139 | 15 | 15 | 0.255 |
| GENE_A_16_P41426708 | 142 | 13 | 13 | 0.260 |
| GENE_A_16_P03568924 | 124 | 12 | 12 | 0.227 |
| GENE_A_16_P03554254 | 155 | 13 | 13 | 0.284 |
| GENE_A_16_P03590402 | 156 | 16 | 16 | 0.286 |
| GENE_A_16_P03592473 | 140 | 11 | 11 | 0.256 |
| GENE_A_16_P21248520 | 155 | 15 | 15 | 0.284 |
| GENE_A_16_P03564006 | 134 | 12 | 13 | 0.245 |
| GENE_A_16_P41401149 | 165 | 15 | 15 | 0.302 |
| GENE_A_16_P41395284 | 154 | 15 | 15 | 0.282 |
| GENE_A_16_P03585212 | 152 | 15 | 15 | 0.278 |
| GENE_A_16_P03583338 | 144 | 13 | 13 | 0.263 |



|                     |     |    |    |       |
|---------------------|-----|----|----|-------|
| GENE_A_16_P21200856 | 174 | 18 | 18 | 0.318 |
| GENE_A_16_P41466570 | 156 | 13 | 15 | 0.285 |
| GENE_A_18_P22590704 | 143 | 16 | 16 | 0.262 |
| GENE_A_16_P21202690 | 141 | 14 | 14 | 0.258 |
| GENE_A_16_P21224310 | 149 | 14 | 14 | 0.272 |
| GENE_A_16_P58308235 | 157 | 14 | 14 | 0.287 |
| GENE_A_16_P21193803 | 129 | 12 | 12 | 0.236 |
| GENE_A_16_P58262785 | 162 | 14 | 14 | 0.296 |
| GENE_A_16_P58285537 | 136 | 12 | 12 | 0.249 |
| GENE_A_16_P58277284 | 174 | 20 | 20 | 0.318 |
| GENE_A_16_P41449516 | 161 | 13 | 13 | 0.294 |
| GENE_A_16_P21204828 | 142 | 16 | 16 | 0.259 |
| GENE_A_16_P34817222 | 152 | 15 | 15 | 0.278 |
| GENE_A_16_P03593196 | 146 | 16 | 16 | 0.267 |
| GENE_A_18_P13898665 | 153 | 14 | 14 | 0.280 |
| GENE_A_16_P21249077 | 156 | 13 | 13 | 0.285 |
| GENE_A_18_P13879329 | 145 | 12 | 13 | 0.265 |
| GENE_A_16_P21246465 | 150 | 15 | 15 | 0.274 |
| GENE_A_16_P21199808 | 164 | 16 | 16 | 0.299 |
| GENE_A_18_P13923298 | 154 | 15 | 15 | 0.281 |
| GENE_A_16_P03555856 | 167 | 18 | 18 | 0.305 |
| GENE_A_16_P03588591 | 145 | 12 | 12 | 0.265 |
| GENE_A_16_P03581593 | 147 | 15 | 15 | 0.268 |
| GENE_A_16_P21209655 | 154 | 15 | 15 | 0.281 |
| GENE_A_16_P03592501 | 166 | 17 | 17 | 0.303 |
| GENE_A_16_P58277397 | 131 | 15 | 15 | 0.239 |
| GENE_A_18_P13909849 | 161 | 17 | 17 | 0.294 |
| GENE_A_16_P41392979 | 167 | 16 | 16 | 0.305 |
| GENE_A_18_P13864871 | 160 | 12 | 12 | 0.292 |
| GENE_A_16_P21212702 | 158 | 13 | 13 | 0.288 |
| GENE_A_16_P41430062 | 179 | 21 | 21 | 0.326 |
| GENE_A_18_P22559756 | 141 | 13 | 13 | 0.257 |
| GENE_A_16_P58299000 | 159 | 17 | 17 | 0.290 |
| GENE_A_16_P21227348 | 139 | 12 | 12 | 0.253 |
| GENE_A_16_P21229166 | 135 | 14 | 14 | 0.246 |
| GENE_A_16_P41453335 | 161 | 18 | 18 | 0.293 |
| GENE_A_16_P21202730 | 144 | 17 | 17 | 0.262 |
| GENE_A_18_P13876081 | 163 | 14 | 14 | 0.297 |
| GENE_A_18_P22559208 | 190 | 18 | 18 | 0.346 |
| GENE_A_16_P03576742 | 125 | 12 | 12 | 0.228 |
| GENE_A_16_P58275892 | 164 | 17 | 17 | 0.299 |
| GENE_A_16_P03558899 | 167 | 17 | 17 | 0.304 |
| GENE_A_16_P03581376 | 140 | 13 | 13 | 0.255 |
| GENE_A_16_P58267876 | 154 | 15 | 15 | 0.280 |
| GENE_A_16_P58283969 | 145 | 16 | 16 | 0.264 |
| GENE_A_16_P21228924 | 144 | 12 | 12 | 0.262 |

|                     |     |    |    |       |
|---------------------|-----|----|----|-------|
| GENE_A_16_P58298216 | 167 | 14 | 14 | 0.304 |
| GENE_A_18_P13931769 | 152 | 14 | 14 | 0.277 |
| GENE_A_16_P03583880 | 164 | 15 | 15 | 0.298 |
| GENE_A_16_P41445062 | 169 | 19 | 19 | 0.307 |
| GENE_A_16_P58295285 | 155 | 19 | 19 | 0.282 |
| GENE_A_16_P21221675 | 154 | 15 | 15 | 0.280 |
| GENE_A_16_P41402843 | 150 | 11 | 11 | 0.273 |
| GENE_A_16_P58289195 | 163 | 13 | 13 | 0.296 |
| GENE_A_16_P58274275 | 155 | 16 | 17 | 0.282 |
| GENE_A_16_P03552918 | 164 | 16 | 16 | 0.298 |
| GENE_A_16_P34803004 | 128 | 12 | 12 | 0.233 |
| GENE_A_16_P21203744 | 153 | 14 | 14 | 0.278 |
| GENE_A_18_P13924157 | 158 | 15 | 15 | 0.287 |
| GENE_A_16_P58289744 | 164 | 17 | 18 | 0.298 |
| GENE_A_16_P03578708 | 139 | 14 | 14 | 0.253 |
| GENE_A_16_P41471052 | 130 | 12 | 12 | 0.236 |
| GENE_A_16_P03562050 | 148 | 13 | 14 | 0.269 |
| GENE_A_16_P58291095 | 150 | 14 | 14 | 0.273 |
| GENE_A_16_P21227035 | 137 | 12 | 12 | 0.249 |
| GENE_A_16_P03552578 | 153 | 18 | 18 | 0.278 |
| GENE_A_16_P21212439 | 154 | 14 | 14 | 0.280 |
| GENE_A_16_P41391382 | 137 | 13 | 13 | 0.249 |
| GENE_A_16_P21200533 | 156 | 16 | 16 | 0.283 |
| GENE_A_18_P22558324 | 155 | 18 | 18 | 0.281 |
| GENE_A_18_P13886290 | 131 | 10 | 10 | 0.238 |
| GENE_A_16_P21252300 | 169 | 17 | 17 | 0.307 |
| GENE_A_16_P03561424 | 175 | 19 | 19 | 0.318 |
| GENE_A_16_P58290165 | 134 | 11 | 11 | 0.243 |
| GENE_A_16_P21193283 | 137 | 16 | 16 | 0.249 |
| GENE_A_16_P41420967 | 157 | 14 | 14 | 0.285 |
| GENE_A_18_P13905559 | 168 | 14 | 14 | 0.305 |
| GENE_A_16_P21197745 | 144 | 13 | 14 | 0.261 |
| GENE_A_16_P03592837 | 144 | 14 | 15 | 0.261 |
| GENE_A_16_P21246781 | 159 | 16 | 16 | 0.288 |
| GENE_A_16_P21233200 | 148 | 12 | 12 | 0.268 |
| GENE_A_16_P58265164 | 163 | 17 | 17 | 0.295 |
| GENE_A_16_P03589477 | 145 | 11 | 11 | 0.263 |
| GENE_A_16_P21217947 | 158 | 15 | 15 | 0.286 |
| GENE_A_18_P13890039 | 149 | 11 | 11 | 0.270 |
| GENE_A_18_P13900668 | 177 | 16 | 16 | 0.321 |
| GENE_A_16_P58263769 | 150 | 13 | 13 | 0.272 |
| GENE_A_16_P41403411 | 157 | 17 | 17 | 0.284 |
| GENE_A_16_P41448987 | 149 | 16 | 16 | 0.270 |
| GENE_A_16_P21196344 | 158 | 13 | 14 | 0.286 |
| GENE_A_16_P03568539 | 156 | 19 | 19 | 0.283 |
| GENE_A_18_P13905547 | 145 | 13 | 13 | 0.263 |

|                     |     |    |    |       |
|---------------------|-----|----|----|-------|
| GENE_A_16_P03561349 | 151 | 18 | 18 | 0.273 |
| GENE_A_16_P58296353 | 154 | 15 | 15 | 0.279 |
| GENE_A_16_P03571124 | 159 | 16 | 16 | 0.288 |
| GENE_A_16_P21245316 | 139 | 14 | 14 | 0.252 |
| GENE_A_16_P21247787 | 155 | 16 | 16 | 0.281 |
| GENE_A_16_P58275609 | 138 | 15 | 15 | 0.250 |
| GENE_A_16_P21229671 | 147 | 13 | 14 | 0.266 |
| GENE_A_18_P22493240 | 169 | 16 | 16 | 0.306 |
| GENE_A_18_P13896234 | 142 | 12 | 12 | 0.257 |
| GENE_A_16_P34821511 | 150 | 14 | 14 | 0.271 |
| GENE_A_16_P58275410 | 150 | 14 | 14 | 0.271 |
| GENE_A_16_P58266931 | 177 | 14 | 14 | 0.320 |
| GENE_A_18_P22588341 | 166 | 16 | 16 | 0.300 |
| GENE_A_16_P21221166 | 154 | 12 | 12 | 0.279 |
| GENE_A_16_P41416935 | 149 | 12 | 12 | 0.269 |
| GENE_A_16_P03581657 | 131 | 13 | 13 | 0.237 |
| GENE_A_18_P13931896 | 148 | 14 | 14 | 0.268 |
| GENE_A_18_P22587162 | 151 | 17 | 17 | 0.273 |
| GENE_A_16_P41425294 | 149 | 15 | 15 | 0.269 |
| GENE_A_16_P41389723 | 152 | 16 | 16 | 0.275 |
| GENE_A_16_P21243753 | 160 | 16 | 16 | 0.289 |
| GENE_A_18_P22587763 | 144 | 10 | 10 | 0.260 |
| GENE_A_16_P21217141 | 139 | 15 | 15 | 0.251 |
| GENE_A_16_P21260267 | 145 | 14 | 14 | 0.262 |
| GENE_A_16_P21234889 | 168 | 14 | 14 | 0.304 |
| GENE_A_16_P41394984 | 157 | 11 | 11 | 0.284 |
| GENE_A_16_P41406144 | 149 | 17 | 17 | 0.269 |
| GENE_A_16_P58268624 | 157 | 16 | 16 | 0.284 |
| GENE_A_16_P21248173 | 169 | 18 | 18 | 0.305 |
| GENE_A_16_P21221686 | 167 | 15 | 15 | 0.302 |
| GENE_A_16_P03588846 | 144 | 14 | 14 | 0.260 |
| GENE_A_16_P21259300 | 160 | 19 | 19 | 0.289 |
| GENE_A_18_P22519971 | 148 | 14 | 14 | 0.267 |
| GENE_A_16_P21207036 | 158 | 13 | 13 | 0.285 |
| GENE_A_16_P58297996 | 158 | 18 | 18 | 0.285 |
| GENE_A_16_P58291148 | 143 | 13 | 13 | 0.258 |
| GENE_A_18_P13927957 | 131 | 12 | 12 | 0.237 |
| GENE_A_16_P21219605 | 170 | 17 | 18 | 0.307 |
| GENE_A_16_P03567437 | 155 | 15 | 15 | 0.280 |
| GENE_A_16_P03597840 | 135 | 11 | 11 | 0.244 |
| GENE_A_16_P21256797 | 155 | 13 | 13 | 0.280 |
| GENE_A_16_P03556674 | 168 | 17 | 17 | 0.303 |
| GENE_A_16_P58268511 | 169 | 17 | 17 | 0.305 |
| GENE_A_16_P41399889 | 166 | 13 | 13 | 0.300 |
| GENE_A_16_P58260108 | 140 | 15 | 15 | 0.253 |
| GENE_A_16_P21196198 | 153 | 13 | 13 | 0.276 |

|                     |     |    |    |       |
|---------------------|-----|----|----|-------|
| GENE_A_16_P21202186 | 164 | 13 | 13 | 0.296 |
| GENE_A_18_P13893831 | 153 | 14 | 14 | 0.276 |
| GENE_A_16_P58263320 | 162 | 16 | 16 | 0.292 |
| GENE_A_16_P58270669 | 148 | 15 | 15 | 0.267 |
| GENE_A_16_P03580766 | 173 | 15 | 15 | 0.312 |
| GENE_A_16_P21252328 | 171 | 20 | 20 | 0.309 |
| GENE_A_16_P58263351 | 157 | 16 | 16 | 0.283 |
| GENE_A_16_P03562117 | 157 | 13 | 13 | 0.283 |
| GENE_A_16_P58276937 | 155 | 15 | 15 | 0.280 |
| GENE_A_18_P13869644 | 159 | 15 | 15 | 0.287 |
| GENE_A_16_P21237745 | 151 | 16 | 16 | 0.272 |
| GENE_A_16_P21195416 | 164 | 17 | 17 | 0.296 |
| GENE_A_18_P13881731 | 147 | 13 | 14 | 0.265 |
| GENE_A_16_P58294157 | 156 | 13 | 13 | 0.281 |
| GENE_A_16_P41401732 | 136 | 9  | 9  | 0.245 |
| GENE_A_16_P21214655 | 129 | 14 | 14 | 0.232 |
| GENE_A_16_P58267909 | 151 | 15 | 15 | 0.272 |
| GENE_A_16_P41427161 | 133 | 11 | 11 | 0.240 |
| GENE_A_16_P03561317 | 175 | 16 | 16 | 0.315 |
| GENE_A_18_P13945551 | 141 | 13 | 13 | 0.254 |
| GENE_A_16_P21203878 | 158 | 14 | 14 | 0.285 |
| GENE_A_18_P13879595 | 153 | 13 | 14 | 0.276 |
| GENE_A_18_P13873749 | 160 | 17 | 17 | 0.288 |
| GENE_A_16_P03572834 | 136 | 13 | 13 | 0.245 |
| GENE_A_16_P03582347 | 149 | 14 | 14 | 0.268 |
| GENE_A_18_P13884499 | 151 | 14 | 14 | 0.272 |
| GENE_A_16_P21206519 | 161 | 13 | 13 | 0.290 |
| GENE_A_16_P21229793 | 167 | 15 | 15 | 0.301 |
| GENE_A_16_P58268877 | 152 | 12 | 12 | 0.274 |
| GENE_A_16_P21237937 | 154 | 17 | 18 | 0.277 |
| GENE_A_16_P21257326 | 165 | 17 | 17 | 0.297 |
| GENE_A_16_P03570483 | 165 | 18 | 18 | 0.297 |
| GENE_A_16_P58265205 | 169 | 17 | 17 | 0.304 |
| GENE_A_16_P58272383 | 131 | 14 | 14 | 0.236 |
| GENE_A_16_P21212895 | 155 | 16 | 17 | 0.279 |
| GENE_A_16_P41456476 | 162 | 16 | 16 | 0.292 |
| GENE_A_16_P21207186 | 150 | 14 | 14 | 0.270 |
| GENE_A_16_P58267746 | 151 | 11 | 11 | 0.272 |
| GENE_A_16_P58265677 | 146 | 16 | 16 | 0.263 |
| GENE_A_16_P03585924 | 158 | 15 | 16 | 0.284 |
| GENE_A_16_P21214769 | 148 | 14 | 14 | 0.266 |
| GENE_A_16_P03569727 | 149 | 15 | 15 | 0.268 |
| GENE_A_18_P13892461 | 149 | 14 | 14 | 0.268 |
| GENE_A_16_P41457755 | 138 | 14 | 14 | 0.248 |
| GENE_A_16_P21220215 | 175 | 18 | 18 | 0.315 |
| GENE_A_16_P41390883 | 126 | 9  | 9  | 0.227 |

|                     |     |    |    |       |
|---------------------|-----|----|----|-------|
| GENE_A_18_P22549057 | 121 | 11 | 11 | 0.217 |
| GENE_A_16_P21255612 | 149 | 16 | 16 | 0.268 |
| GENE_A_16_P21228579 | 142 | 14 | 14 | 0.255 |
| GENE_A_16_P58299420 | 153 | 14 | 14 | 0.275 |
| GENE_A_16_P41435798 | 148 | 14 | 14 | 0.266 |
| GENE_A_16_P58294549 | 150 | 12 | 12 | 0.269 |
| GENE_A_16_P21195539 | 158 | 16 | 16 | 0.284 |
| GENE_A_16_P03594580 | 150 | 16 | 16 | 0.269 |
| GENE_A_16_P58275416 | 148 | 15 | 15 | 0.266 |
| GENE_A_16_P58271974 | 142 | 15 | 15 | 0.255 |
| GENE_A_18_P13908404 | 159 | 16 | 16 | 0.286 |
| GENE_A_16_P58293863 | 152 | 14 | 14 | 0.273 |
| GENE_A_16_P21197554 | 137 | 11 | 11 | 0.246 |
| GENE_A_16_P03593908 | 169 | 16 | 16 | 0.303 |
| GENE_A_16_P21200371 | 117 | 13 | 14 | 0.210 |
| GENE_A_16_P41448900 | 143 | 13 | 14 | 0.257 |
| GENE_A_16_P58291107 | 164 | 15 | 15 | 0.294 |
| GENE_A_16_P58308144 | 137 | 13 | 13 | 0.246 |
| GENE_A_16_P58281503 | 158 | 18 | 18 | 0.284 |
| GENE_A_16_P21229298 | 147 | 13 | 13 | 0.264 |
| GENE_A_16_P21265340 | 152 | 16 | 16 | 0.273 |
| GENE_A_16_P58274477 | 147 | 17 | 17 | 0.264 |
| GENE_A_16_P58262765 | 161 | 18 | 18 | 0.289 |
| GENE_A_16_P21207662 | 171 | 15 | 16 | 0.307 |
| GENE_A_16_P58268240 | 127 | 11 | 11 | 0.228 |
| GENE_A_16_P58284147 | 138 | 12 | 12 | 0.248 |
| GENE_A_16_P21256043 | 137 | 13 | 13 | 0.246 |
| GENE_A_16_P58283330 | 159 | 16 | 16 | 0.285 |
| GENE_A_16_P58298691 | 163 | 15 | 15 | 0.292 |
| GENE_A_16_P21219809 | 147 | 14 | 14 | 0.264 |
| GENE_A_16_P58298647 | 165 | 12 | 12 | 0.296 |
| GENE_A_16_P41459766 | 139 | 12 | 12 | 0.249 |
| GENE_A_16_P58308015 | 140 | 14 | 14 | 0.251 |
| GENE_A_16_P41438465 | 172 | 17 | 17 | 0.308 |
| GENE_A_16_P03583715 | 168 | 13 | 14 | 0.301 |
| GENE_A_16_P58267302 | 149 | 14 | 14 | 0.267 |
